# Supplementary material
Source: PubMed Central journal article supplement (PMC8451184)

## Supplementary Appendix

This appendix has been provided by the authors to give readers additional information about their work.

Supplement to: Thompson MG, Stenehjem E, Grannis S, et al. Effectiveness of Covid-19 vaccines in ambulatory and inpatient care settings. *N Engl J Med*. DOI: 10.1056/NEJMoa2110362

**SUPPLEMENTAL APPENDIX**

## Table of Contents

### **SECTION S1. SUPPLEMENTAL TABLES REFERENCED IN MANUSCRIPT----- 6**

|                                                                                                                                                                                                                                                                   |    |
|-------------------------------------------------------------------------------------------------------------------------------------------------------------------------------------------------------------------------------------------------------------------|----|
| Table S1. Composition of site-regions and circulation of SARS-CoV-2 Variants of Concern by VISION Network Partners -----                                                                                                                                          | 7  |
| Table S2. Acute illness categories and related International Classification of Diseases, 9th and 10th Revision (ICD) discharge codes-----                                                                                                                         | 9  |
| Table S3. Inclusion and exclusion for hospitalizations analytic sample-----                                                                                                                                                                                       | 13 |
| Table S4. Median Days from vaccine eligibility to index date among unvaccinated and from most recent vaccine dose to index date among vaccinated adults for analytic sample of hospitalizations and emergency department and urgent care (ED/UC) encounters ----- | 15 |
| Table S5. Inclusion and exclusion for ED/UC analytic sample-----                                                                                                                                                                                                  | 17 |
| Tables S6-S11: Characteristics by Site -----                                                                                                                                                                                                                      | 19 |
| Table S12. Characteristics of Full Sample - Hospitalizations-----                                                                                                                                                                                                 | 42 |
| Table S13. Characteristics of Full Sample – ED/UC-----                                                                                                                                                                                                            | 46 |
| Table S14. Characteristics of Sample – Positives Only - Hospitalizations-----                                                                                                                                                                                     | 49 |
| Table S15. Characteristics of Sample – Positives Only - ED/UC -----                                                                                                                                                                                               | 53 |
| Table S16. Full listing of all estimates of messenger RNA (mRNA) vaccine effectiveness (VE) among COVID-19-associated hospitalizations and intensive care unit (ICU) admissions events -----                                                                      | 56 |
| Table S17. mRNA VE against COVID-19-associated hospitalizations and ED/UC medical events by study site-----                                                                                                                                                       | 60 |
| Table S18. Full listing of all estimates of mRNA VE among COVID-19-associated hospitalizations by days past most recent dose-----                                                                                                                                 | 61 |
| Table S19. Full listing of all estimates of mRNA VE among COVID-19-associated ED/UC medical events-----                                                                                                                                                           | 63 |
| Table_S20. Full listing of all estimates of mRNA VE among COVID-19-associated ED/UC medical events by days past most recent dose-----                                                                                                                             | 67 |

### **SECTION S2. SUPPLEMENTAL FIGURES REFERENCED IN THE MAIN MANUSCRIPT----- 69**

|                                                                                   |    |
|-----------------------------------------------------------------------------------|----|
| Figures_S1-S10: Epi-curves with local percent positivity by network partners----- | 70 |
|-----------------------------------------------------------------------------------|----|

### **SECTION S3. SUPPLEMENTAL METHODS ----- 80**

#### **A. Study Design:----- 81**

|                                       |    |
|---------------------------------------|----|
| 1. Inclusion/Exclusion criteria ----- | 81 |
|---------------------------------------|----|

|                                                                                                                                                                             |            |
|-----------------------------------------------------------------------------------------------------------------------------------------------------------------------------|------------|
| 2. Outcome definition -----                                                                                                                                                 | 82         |
| 3. COVID-19 Vaccination Status -----                                                                                                                                        | 84         |
| <b>B. Extracting Percent Positivity Data from HHS Protect -----</b>                                                                                                         | <b>85</b>  |
| <b>C. VISION COVID-19 VE Statistical Analysis Plan -----</b>                                                                                                                | <b>86</b>  |
| Table S21. ICD-9 and-10 codes used for underlying medical conditions -----                                                                                                  | 92         |
| <b>SECTION S4. SUPPLEMENTAL BIAS ANALYSIS -----</b>                                                                                                                         | <b>95</b>  |
| <b>SECTION S5. SUPPLEMENTAL RESULTS (OTHER RESULTS NOT IN MAIN<br/>MANUSCRIPT) -----</b>                                                                                    | <b>123</b> |
| <b>A. Sample of Medical Encounters -----</b>                                                                                                                                | <b>124</b> |
| 1. Differences in medical event exclusions by network partner -----                                                                                                         | 124        |
| Figure S11. VISION VE Map of Hospital Locations -----                                                                                                                       | 125        |
| Figure S12. VISION VE Map of ED and UC facilities' Locations -----                                                                                                          | 126        |
| 2. Differences in Race and Ethnicity by Network partner -----                                                                                                               | 127        |
| 3. COVID-19 Vaccine Products and Manufacturer -----                                                                                                                         | 128        |
| <b>B. Laboratory-confirmed COVID-19-associated Medical Encounters -----</b>                                                                                                 | <b>129</b> |
| <b>C. COVID-19 Vaccination Status -----</b>                                                                                                                                 | <b>130</b> |
| Figures S13-19. Statewide COVID-19 Vaccine Coverage Graphs – By State -----                                                                                                 | 131        |
| <b>D. Messenger RNA COVID-19 Vaccine Effectiveness among COVID-19-associated<br/>Hospitalizations -----</b>                                                                 | <b>138</b> |
| 1. Variables included in inverse propensity to be vaccinated weights for Hospital VE -----                                                                                  | 138        |
| Table S22. Bivariate associations between covariates of interest and COVID-19 infection<br>status for hospitalizations -----                                                | 140        |
| Table S23. Quantiles of Weights used for VE Estimates among COVID-19-associated<br>hospitalizations and ICU admissions events -----                                         | 144        |
| Table S24. Unweighted and weighted standardized mean differences (SMD) for variables<br>included in PS model for mRNA-specific VE estimates - Hospitalizations events ----- | 146        |
| 2. Hospital VE Sensitivity Analysis: Between Partner Heterogeneity -----                                                                                                    | 150        |
| Figure S20. mRNA VE against COVID-19-associated hospitalizations by study site, with<br>statistics assessing heterogeneity -----                                            | 151        |
| 3. Hospital VE Sensitivity Analysis: Alternative Clinical Outcomes -----                                                                                                    | 152        |
| 4. Hospital VE Sensitivity Analysis: Exclude Historical SARS-CoV-2 Positives -----                                                                                          | 153        |

|                                                                                                                                                                                                                                                                |            |
|----------------------------------------------------------------------------------------------------------------------------------------------------------------------------------------------------------------------------------------------------------------|------------|
| Table S25. mRNA VE among COVID-19-associated hospitalizations, ICU admissions, and ED/UC medical events among those without historical positives -----                                                                                                         | 154        |
| <b>5. Hospital VE Sensitivity Analysis: Propensity of Clinical Testing for SARS-CoV-2 -----</b>                                                                                                                                                                | <b>156</b> |
| Table S26. Characteristics of adults with medically attended COVID-19-like illness and the percent with SARS-CoV-2 testing within 14 days prior to, or within <72 hours after, the time of hospital admission or ED/UC visit-----                              | 157        |
| Table S27. Characteristics of vaccinated and unvaccinated adults with medically attended COVID-19-like illness stratified by SARS-CoV-2 testing status within 14 days prior to, or within <72 hours after, the time of hospital admission or ED/UC visit ----- | 161        |
| Table_S28. mRNA VE against COVID-19-associated hospitalization and ED/UC medical events after accounting for likelihood of testing -----                                                                                                                       | 166        |
| <b>E. Messenger RNA COVID-19 Vaccine Effectiveness among COVID-19-associated Emergency Department and Urgent Care Encounters -----</b>                                                                                                                         | <b>167</b> |
| 1. Variables included in inverse propensity to be vaccinated weights for ED/UC -----                                                                                                                                                                           | 167        |
| Table S29. Bivariate associations between covariates of interest and COVID-19 infection status for ED/UC medical events-----                                                                                                                                   | 168        |
| Table S30. Quantiles of Inverse Propensity to be Vaccinated Weights used for ED/UC VE Estimates -----                                                                                                                                                          | 171        |
| 2. ED/UC VE Sensitivity Analysis: Between Partner Heterogeneity -----                                                                                                                                                                                          | 173        |
| 3. ED/UC VE Sensitivity Analysis: Alternative Clinical Outcomes -----                                                                                                                                                                                          | 173        |
| 4. ED/UC VE Sensitivity Analysis: Exclude Historical SARS-CoV-2 Positives -----                                                                                                                                                                                | 174        |
| 5. ED/UC VE Sensitivity Analysis: Propensity of Clinical Testing for SARS-CoV-2-----                                                                                                                                                                           | 175        |
| Table S31. Unweighted and weighted standardized mean differences (SMD) for variables included in PS model1 for unvaccinated and mRNA vaccinees only - ED/UC medical events -----                                                                               | 176        |
| <b>F. Johnson &amp; Johnson COVID-19 Vaccine Effectiveness -----</b>                                                                                                                                                                                           | <b>179</b> |
| 1. Adaptation of methods for product specific VE analysis -----                                                                                                                                                                                                | 179        |
| 2. Variables included in inverse propensity to be vaccinated weights -----                                                                                                                                                                                     | 181        |
| Table S32. Unweighted and weighted standardized mean differences (SMD) for variables included in PS model for unvaccinated and J&J vaccinees only - Hospitalization events----                                                                                 | 182        |
| Table S33. Unweighted and weighted standardized mean differences (SMD) for variables included in PS model for unvaccinated and J&J vaccinees only - ED/UC medical events---                                                                                    | 184        |
| <b>G. COVID-19 VE Sensitivity Analysis: Propensity Score Estimation Using All Observations -----</b>                                                                                                                                                           | <b>186</b> |
| Table S34. Unweighted and weighted standardized mean differences (SMD) for variables included in PS model for mRNA-specific VE estimates - Hospitalizations events-----                                                                                        | 187        |

|                                                                                                                                                                                           |     |
|-------------------------------------------------------------------------------------------------------------------------------------------------------------------------------------------|-----|
| Table S35. Unweighted and weighted standardized mean differences (SMD) for variables included in PS model for mRNA-specific VE estimates - ED/UC medical events -----                     | 191 |
| Table S36. Unweighted and weighted standardized mean differences (SMD) for variables included in PS model for unvaccinated and J&J vaccinees only - Hospitalization events ----           | 194 |
| Table S37. Unweighted and weighted standardized mean differences (SMD) for variables included in PS model for unvaccinated and J&J vaccinees only - ED/UC medical events ---              | 196 |
| Figure S21. Estimates of COVID-19 vaccine effectiveness (VE) among COVID-19 associated hospitalizations and ED/UC encounters by vaccine product -----                                     | 198 |
| Figure S22. Estimated VE of full 2-dose vaccination with mRNA vaccines among COVID-19 associated hospitalizations by age group, race, ethnicity, and underlying medical conditions -----  | 199 |
| Figure S23. Estimated VE of full 2-dose vaccination with mRNA vaccines among COVID-19 associated ED/UC encounters by age group, race, ethnicity, and underlying medical conditions. ----- | 200 |

**Section S1. Supplemental Tables Referenced in Manuscript**

**Table S1. Composition of site-regions and circulation of SARS-CoV-2 Variants of Concern through June 2021 by VISION Network Partners**

| VISION Partner                               | Composition of Site-Regions                                                                                                                                                                                                                                                                             | SARS-CoV-2 Variants of Concern *                                                                                                                                                                                                                                                                                                                                                                                                                                                                                                                                                                                                     |
|----------------------------------------------|---------------------------------------------------------------------------------------------------------------------------------------------------------------------------------------------------------------------------------------------------------------------------------------------------------|--------------------------------------------------------------------------------------------------------------------------------------------------------------------------------------------------------------------------------------------------------------------------------------------------------------------------------------------------------------------------------------------------------------------------------------------------------------------------------------------------------------------------------------------------------------------------------------------------------------------------------------|
| Columbia University (CUIMC)                  | Region 1: Bronx County, Kings County, New York County, Queens County, Richmond County                                                                                                                                                                                                                   | In March, over a quarter (28%) of viruses identified were B.1.1.7. This percentage increased to 48% by the end of April, 57% by the end of May, but fell to 40% by mid-June. P1 viruses increased from 0.1% at the end of March to <10% by mid-June. B.1.351, B.1.427 and B.1.429 viruses have circulated at very low levels (<5%) from March to June. B.1.617.2 viruses increased from 1.7% by the end of May to 19% by mid-June.                                                                                                                                                                                                   |
| HealthPartners (HP)                          | Region 1: Hennepin and Ramsey counties; Region 2: Polk, St. Croix and Washington, Mcleod and Renville counties                                                                                                                                                                                          | In March, over half (55%) of viruses identified were B.1.1.7. This percentage increased to 75% by the end of April, 81% by the end of May, and decreased to 73% by mid-June. P1 viruses increased from 0.3% at the end of March to <10% by mid-June. B.1.351, B.1.427 and B.1.429 viruses have circulated at very low levels (<5%) from March to June. B.1.617.2 viruses increased from 0.6% by the end of May to 9% by mid-June.                                                                                                                                                                                                    |
| Intermountain Healthcare (IH)                | Region 1: Box Elder county and Cache counties; Region 2: Davis county; Region 3: Tooele and Salt Lake counties; Region 4: Utah county; Region 5: Summit and Wasatch counties; Region 6: Weber county; Region 7: Sanpete, Sevier and Millard counties; Region 8: Garfield, Iron and Washington counties. | As of July 13, 2021, CDC has insufficient genomic surveillance data for the specified time interval for the state of Utah.                                                                                                                                                                                                                                                                                                                                                                                                                                                                                                           |
| Kaiser Permanente Northern California (KPNC) | Region 1: Fresno county; Region 2: Stanislaus county; Region 3: Placer and Sacramento counties; Region 4: Alameda, Contra Costa, Marin, San Francisco, and San Mateo counties; Region 5: Santa Clara county; Region 6: Sonoma county; Region 7: San Joaquin county; Region 8: Solano county             | In March, 16% of viruses identified were B.1.1.7. This percentage increased to 45% by the end of April, 58% by the end of May, and decreased to 39% by mid-June. P1 viruses increased from 1.6% at the end of March to 13% by mid-June. While B.1.427 and B.1.429 viruses were identified in 54% of all viruses by the end of March, this percentage decreased to 5% by the end of May. B.1.351 viruses have circulated at very low levels (<5%) from March to June. B.1.617.2 viruses increased from 3.4% by the end of May to 31% by mid-June.                                                                                     |
| Kaiser Permanente Northwest (KPNW)           | Region 1: Multnomah, Washington, Clackamas, Clatsop, and Yamhill counties; Region 2: King, Chelan, Clark, Pacific, Spokane and Cowlitz counties; Region 3: Benton, Deschutes, Harney, Lane, Linn, Marion, Polk, Umatilla, and Wasco counties                                                            | CDC had insufficient genomic surveillance data for the period ending March 25 and April 10. By the end of April, 39% of viruses identified were B.1.1.7. This percentage increased to 49% by the end of May and increased to 54% by mid-June. P1 viruses increased from 4% at the end of April to 24% by mid-June. While B.1.427 and B.1.429 viruses were identified in 25% of all viruses by the end of April, this percentage decreased to 10% by the end of May. B.1.351 viruses have circulated at very low levels (<5%) from March to June. B.1.617.2 viruses increased slightly from 0.2% by the end of May to 3% by mid-June. |



|                              |                                                                                                                                                                                                                                                                                                                                                                                                                                                                                                                                                                                                                                                                                                                                                                                                                                                                                                                                                                                  |                                                                                                                                                                                                                                                                                                                                                                                                                                                                                                    |
|------------------------------|----------------------------------------------------------------------------------------------------------------------------------------------------------------------------------------------------------------------------------------------------------------------------------------------------------------------------------------------------------------------------------------------------------------------------------------------------------------------------------------------------------------------------------------------------------------------------------------------------------------------------------------------------------------------------------------------------------------------------------------------------------------------------------------------------------------------------------------------------------------------------------------------------------------------------------------------------------------------------------|----------------------------------------------------------------------------------------------------------------------------------------------------------------------------------------------------------------------------------------------------------------------------------------------------------------------------------------------------------------------------------------------------------------------------------------------------------------------------------------------------|
| Regenstrief Institute (RG)   | Region 1: Jasper, Lake, La Porte, Newton, Porter; Region 2: Elkhart, Fulton, Kosciusko, Marshall, Pulaski, St. Joseph, Starke; Region 3: Adams, Allen, DeKalb, Huntington, Lagrange, Miami, Noble, Steuben, Wabash, Wells, Whitley; Region 4: Benton, Carroll, Cass, Clinton, Fountain, Tippecanoe, Montgomery, Warren, White; Region 5: Boone, Johnson, Hamilton, Hancock, Hendricks, Marion, Morgan, Shelby; Region 6: Blackford, Delaware, Fayette, Grant, Henry, Howard, Jay, Madison, Randolph, Rush, Tipton, Union, Wayne; Region 7: Clay, Greene, Owen, Parke, Putnam, Sullivan, Vermillion, Vigo; Region 8: Bartholomew, Brown, Jackson, Lawrence, Monroe, Orange, Washington; Region 9: Clark, Dearborn, Decatur, Floyd, Franklin, Harrison, Jefferson, Jennings, Ohio, Ripley, Scott, Switzerland; Region 10: Crawford, Daviess, Dubois, Gibson, Knox, Martin, Spencer, Perry, Pike, Posey, Vanderburgh, Warrick; Region 11: all encounters missing county information | In March, almost a quarter (24%) of viruses identified were B.1.1.7. This percentage increased to 65% by the end of April and 73% by the beginning of June. P1 viruses increased from 0.6% at the end of March to 12% by early June. B.1.351, B.1.427 and B.1.429 viruses have circulated at very low levels (<10%) from March to June. B.1.617.2 viruses increased from 2.3% by the end of May to 8% by early June. CDC had insufficient genomic surveillance data for the period ending June 19. |
| University of Colorado (UCO) | Region 1: Adams, Arapahoe, Douglas, Boulder, Denver, Broomfield and Jefferson counties; Region 2: Larimer, Weld and Routt counties; Region 3: El Paso and Teller counties                                                                                                                                                                                                                                                                                                                                                                                                                                                                                                                                                                                                                                                                                                                                                                                                        | In March, over a quarter (29%) of viruses identified were B.1.1.7. This percentage increased to 60% by the end of April, 80% by the end of May, and decreased to 52% by mid-June. While B.1.427 and B.1.429 viruses were identified in 28% of all viruses by the end of March, this percentage dropped to 2% by the end of May. B.1.351, and P1 viruses have circulated at very low levels (<5%) from March to June. B.1.617.2 viruses increased from 4.3% by the end of May to 37% by mid-June.   |

\* As of July 13, 2021, there are four Variants of Concern circulating in the United States (B.1.1.7, B.1.351, B.1.617.2, and P.1). B.1.427 and B.1.429 had previously been designated variants of concern but have been reclassified as variants of interest as both have conclusively demonstrated to no longer pose a major added risk to global health compared to other circulating SARS-CoV-2 variants. Proportions are based on CDC sequence data (NS3 + CDC-funded contract sequencing) collected over a 4-week period for states with at least 300 sequences. Proportions are calculated using empirical (unweighted) data, which are subject to change over time. Sequences are assigned to a jurisdiction based on where the specimen was collected. Proportions of variants do not represent the total number that may be circulating in the United States and may not match cases reported by states, territories, tribe and local officials. Data available at CDC COVID Data Tracker (<https://covid.cdc.gov/covid-data-tracker/#variant-proportions>). Site accessed on April 20, May 4, May 18, June 1, June 15, June 29 and July 13, 2021.

**Table S2. Acute illness categories and related International Classification of Diseases, 9th and 10th Revision (ICD) discharge codes**

| Disease Condition                                                                                          | ICD-10 Codes | ICD-9 Codes   |
|------------------------------------------------------------------------------------------------------------|--------------|---------------|
| <b>COVID-19</b>                                                                                            |              |               |
| COVID-19, virus identified                                                                                 | U07.1, U07.2 | N/A           |
| COVID-19, virus not identified                                                                             | U07.1, U07.2 | N/A           |
| Coronavirus infection, unspecified                                                                         | B34.2        | N/A           |
| <b>COVID-19 Pneumonia</b>                                                                                  |              |               |
| Pneumonia due to SARS-associated coronavirus                                                               | J12.81       | N/A           |
| Pneumonia due to coronavirus disease 2019                                                                  | J12.82       | N/A           |
| <b>Influenza Pneumonia</b>                                                                                 |              |               |
| Influenza due to identified novel influenza A virus with pneumonia                                         | J09.X1       | 488.81        |
| Influenza due to other identified influenza virus with pneumonia                                           | J10.0        | N/A           |
| Influenza due to other identified influenza virus with unspecified type of pneumonia                       | J10.00       | 487           |
| Influenza due to other identified influenza virus with the same other identified influenza virus pneumonia | J10.01       | 487           |
| Influenza due to other identified influenza virus with other specified pneumonia                           | J10.08       | 487.0, 488.11 |
| Influenza due to unidentified influenza virus with pneumonia                                               | J11.0        | N/A           |
| Influenza due to unidentified influenza virus with unspecified type of pneumonia                           | J11.00       | 487           |
| Influenza due to unidentified influenza virus with specified pneumonia                                     | J11.08       | 487           |
| Influenza with pneumonia                                                                                   | N/A          | 487*          |
| <b>Other Viral Pneumonia</b>                                                                               |              |               |
|                                                                                                            | J12*         | 480*          |
| <b>Bacterial and Other Pneumonia</b>                                                                       |              |               |
| Streptococcus pneumoniae pneumonia                                                                         | J13          | 481           |
| Hemophilus influenzae pneumonia                                                                            | J14          | 482.2         |
| Other bacterial pneumonia                                                                                  | J15*         | 482*          |
| Pneumonia due to other specified organism                                                                  | J16*         | 483*          |
| Pneumonia in infectious diseases classified elsewhere                                                      | J17          | 484*          |
| Pneumonia, unspecified organism                                                                            | J18*         | 486           |

|                                                    |                                                  |                 |
|----------------------------------------------------|--------------------------------------------------|-----------------|
| Influenza Disease                                  | J09*, J10.1, J10.2, J10.8*, J11.1, J11.2, J11.8* | 488*            |
| Acute respiratory distress syndrome                | J80                                              | 518.82          |
| COPD with acute exacerbation                       | J44.1                                            | 491.21          |
| Asthma acute exacerbation                          | J45.*                                            | 493.*           |
| Respiratory failure                                |                                                  |                 |
| Acute respiratory failure                          | J96.0*                                           | 518.81          |
| Acute and chronic respiratory failure              | J96.2*                                           | 518.84          |
| Respiratory arrest                                 | R09.2                                            | 799.1           |
| Other acute lower respiratory tract infections     |                                                  |                 |
| Acute bronchitis                                   | J20*                                             | 466             |
| Acute bronchiolitis                                | J21*                                             | 466.1*          |
| Unspecified acute lower respiratory infection      | J22                                              | 519.8           |
| Bronchitis, not specified as acute or chronic      | J40                                              | 490             |
| Other chronic obstructive pulmonary disease        | J44                                              | N/A             |
| COPD with acute lower respiratory infection        | J44.0                                            | 491.22          |
| Chronic obstructive pulmonary disease, unspecified | J44.9                                            | 491.20, 496     |
| Simple and mucopurulent chronic bronchitis         | J41*                                             | 491*            |
| Unspecified chronic bronchitis                     | J42                                              | 491.9           |
| Emphysema                                          | J43*                                             | 492*            |
| Bronchiectasis                                     | J47*                                             | 494*            |
| Abscess of lung and mediastinum                    | J85                                              | 513             |
| Gangrene and necrosis of lung                      | J85.0                                            | N/A             |
| Abscess of lung without pneumonia                  | J85.2                                            | 513             |
| Abscess of mediastinum                             | J85.3                                            | 513.1           |
| Abscess of lung with pneumonia                     | J85.1                                            | 513             |
| Pyothorax                                          | J86*                                             | 510*            |
| Acute and chronic sinusitis                        | J01*, J32*                                       | 461*, 473*      |
| Acute upper respiratory tract infections           | J00*, J02*-J06*                                  | 460*, 462*-465* |
| Signs and symptoms of acute respiratory illness    |                                                  |                 |
| Hemoptysis                                         | R04.2                                            | 786.3           |
| Cough                                              | R05                                              | 786.2           |
| Dyspnea unspecified                                | R06.00                                           | 786.09          |
| Shortness of breath                                | R06.02                                           | 786.05          |
| Acute respiratory distress                         | R06.03                                           | N/A             |

|                                                                                              |              |                       |
|----------------------------------------------------------------------------------------------|--------------|-----------------------|
| Stridor                                                                                      | R06.1        | 786.1                 |
| Wheezing                                                                                     | R06.2        | 786.07                |
| Other abnormalities of breathing                                                             | R06.8        | N/A                   |
| Apnea, not elsewhere classified                                                              | R06.81       | 786.03                |
| Tachypnea, NEC                                                                               | R06.82       | 786.06                |
| Other abnormalities of breathing/ Other symptoms involving head & neck                       | R06.89       | 784.99                |
| Other dyspnea and respiratory abnormality                                                    | N/A          | 786.09                |
| Other symptoms involving respiratory system and chest                                        | N/A          | 786.9                 |
| Chest pain on breathing/ painful respiration                                                 | R07.1        | 786.52                |
| Asphyxia and hypoxemia                                                                       | R09.0*       | N/A                   |
| Asphyxia                                                                                     | R09.01       | 799.01                |
| Hypoxemia                                                                                    | R09.02       | 799.02                |
| Pleurisy                                                                                     | R09.1        | 511                   |
| Respiratory arrest                                                                           | R09.2        | 799.1                 |
| Abnormal sputum                                                                              | R09.3        | 786.4                 |
| Other specified symptoms and signs involving the circulatory and respiratory systems         | R09.8*       | 478.19, 784.91, 786.7 |
| Signs and symptoms of acute febrile illness                                                  |              |                       |
| Fever                                                                                        | R50*         | N/A                   |
| Fever presenting with conditions classified elsewhere                                        | R50.81       | 780.61                |
| Fever unspecified                                                                            | R50.9        | 780.6                 |
| Chills (without fever)                                                                       | R68.83       | 780.64                |
| Signs and symptoms of acute non-respiratory illness                                          |              |                       |
| Diarrhea                                                                                     | R19.7        | 787.91                |
| Disturbance of smell and taste                                                               | R43*         | N/A                   |
| Unspecified disturbances of smell and taste                                                  | R43.9        | 781.1, V41.5          |
| Headache                                                                                     | R51*         | 784                   |
| Myalgia                                                                                      | M79.1*       | 729.1                 |
| Sepsis - Symptoms and signs specifically associated with systemic inflammation and infection | R65*         | 785.52                |
| Other malaise                                                                                | R53.81       | 780.79                |
| Other fatigue                                                                                | R53.83       | 780.79                |
| Shock, unspecified                                                                           | R57.9        | 785.5                 |
| Debility unspecified                                                                         | N/A          | 799.3                 |
| Altered level of consciousness / altered mental status                                       | R41.82, R40* | 780.97, 780.0*        |
| Weakness                                                                                     | R53.1        | 780.79                |

|                                          |       |       |
|------------------------------------------|-------|-------|
| Nausea and Vomiting                      | R11.* | 787*  |
| Rash and other nonspecific skin eruption | R21.* | 782.1 |
| Abdominal pain                           | R10*  | 789*  |

\* Includes all sub-codes

**Table S3. Inclusion and exclusion for hospitalizations analytic sample****Panel A – Inclusion and Exclusion Table**

|                                                                                          | Hospital analytic sample |         |       |         |          |         |          |         |
|------------------------------------------------------------------------------------------|--------------------------|---------|-------|---------|----------|---------|----------|---------|
|                                                                                          | Combined Sample          | CUIMC   | HP    | IH      | KPNC     | KPNW    | RG       | UCO     |
| Hospitalizations among adults age 50 years and older with CLI diagnosis                  | 103,199                  | 5,370   | 2,090 | 11,846  | 31,444   | 5,379   | 37,472   | 9,598   |
| EXCLUDE adults hospitalized prior to age-specific inclusion dates                        | <37,614>                 | <1,619> | <802> | <4,028> | <14,811> | <2,902> | <10,478> | <2,974> |
| Hospitalizations among vaccine eligible adults                                           | 65,585                   | 3,751   | 1,288 | 7,818   | 16,633   | 2,477   | 26,994   | 6,624   |
| EXCLUDE if days from discharge are less than lag time for vaccine record update          | <1,185>                  | <0>     | <0>   | <261>   | <0>      | <0>     | <872>    | <52>    |
| Hospitalizations among vaccine eligible adults with updated vaccine records              | 64,400                   | 3,751   | 1,288 | 7,557   | 16,633   | 2,477   | 26,122   | 6,572   |
| EXCLUDE repeat admissions within 30 days now combined into single events                 | <6,607>                  | <448>   | <136> | <569>   | <2,216>  | <236>   | <2,358>  | <644>   |
| Unique adult hospitalizations among vaccine eligible adults with updated vaccine records | 57,793                   | 3,303   | 1,152 | 6,988   | 14,417   | 2,241   | 23,764   | 5,928   |
| EXCLUDE no molecular SARS-CoV-2 testing <14 days to 72-hours after admission             | <14,772>                 | <35>    | <61>  | <2,820> | <593>    | <160>   | <10,642> | <461>   |
| Hospitalizations among vaccine eligible with updated records and clinically tested       | 43,021                   | 3,268   | 1,091 | 4,168   | 13,824   | 2,081   | 13,122   | 5,467   |
| EXCLUDE patients receiving dose-1 <14 days prior to index hospitalization date           | <1,872>                  | <142>   | <102> | <258>   | <403>    | <129>   | <685>    | <153>   |
| Analytic sample of hospitalizations including all COVID-19 vaccines                      | 41,552                   | 3,126   | 989   | 3,910   | 13,824   | 1,952   | 12,437   | 5,314   |

Foot notes:

CUIMC: Columbia University Irving Medical Center

HP: HealthPartners

IH: Intermountain Healthcare

KPNC: Kaiser Permanente Northern California

KPNW: Kaiser Permanente Northwest

RG: Regenstrief Institute

UCO: University of Colorado

**Panel B. Flowcharts for inclusion and exclusion into samples of COVID-19-associated hospitalizations**

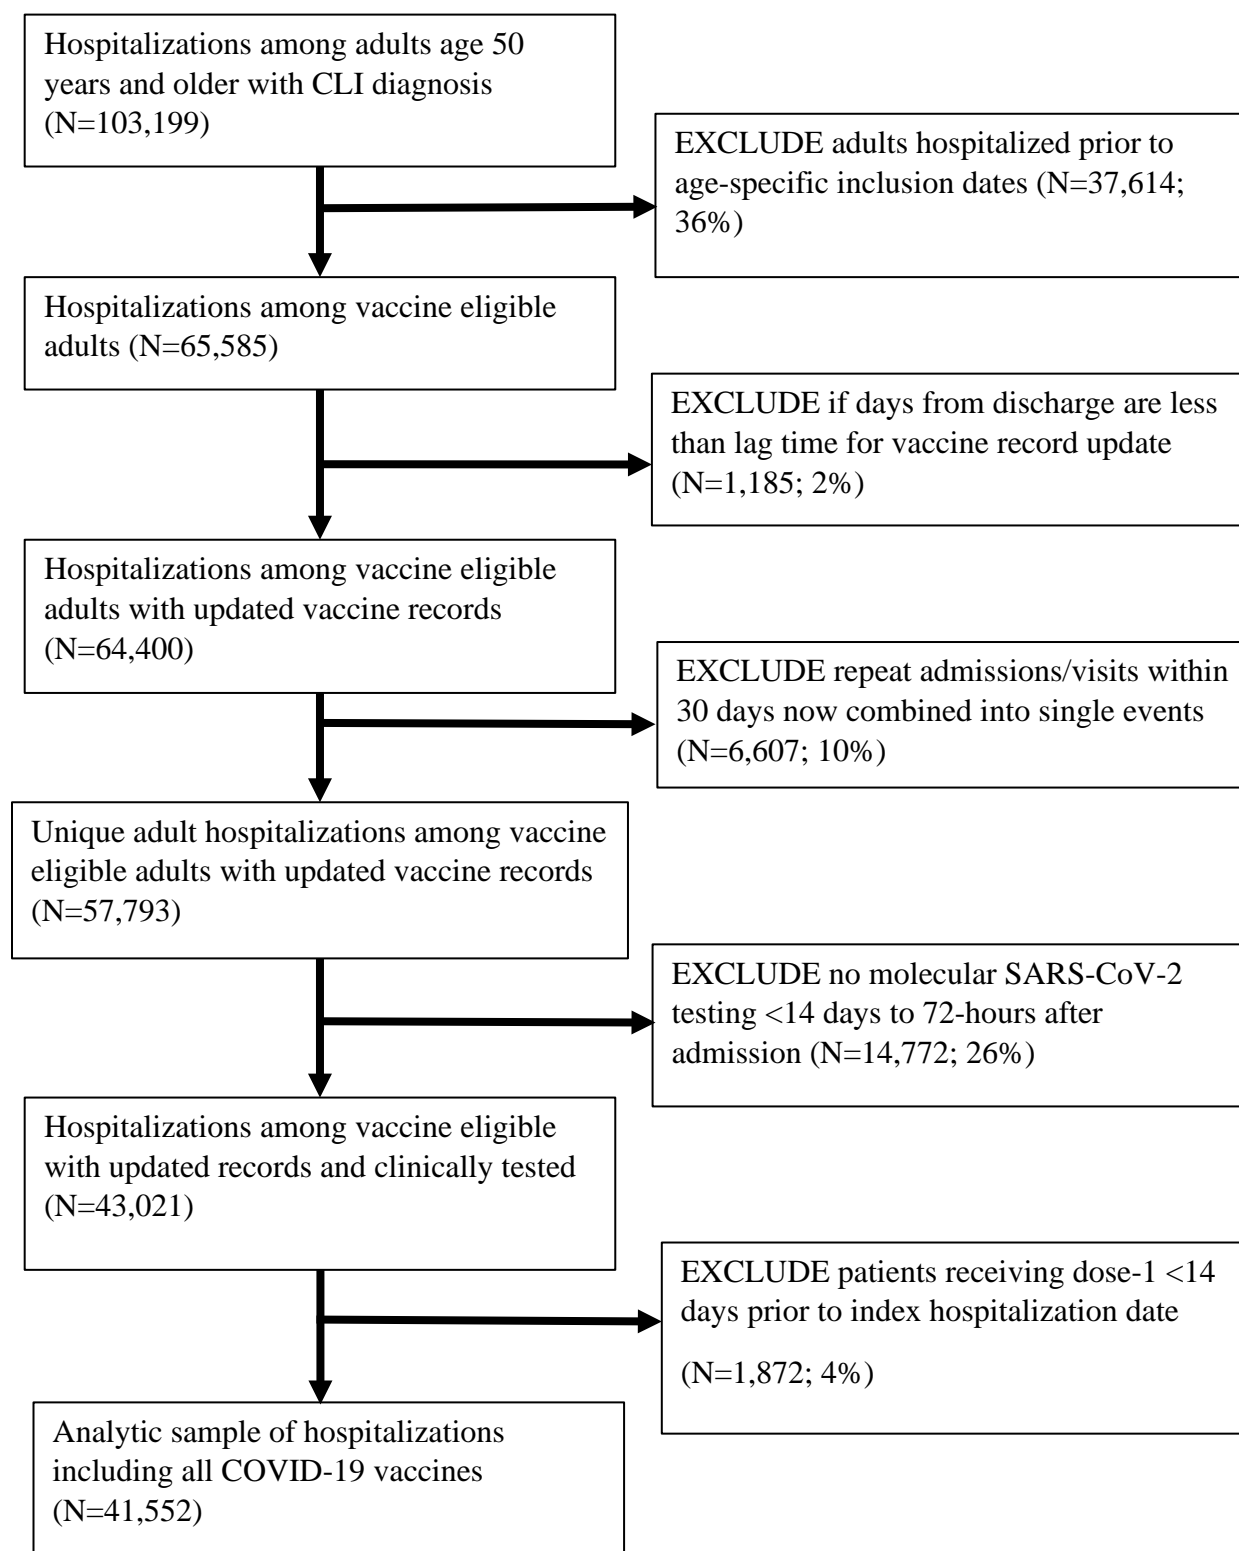

**Table S4. Median Days (Lower and Upper quartiles [Q1-Q3]) from vaccine eligibility to index date among unvaccinated and from most recent vaccine dose to index date among vaccinated adults aged  $\geq 50$  years for analytic sample of hospitalizations and emergency department and urgent care (ED/UC) encounters**

|                             | Days from Vaccine Eligibility by Patient's Age to Index Date among Unvaccinated, Median (Q1-Q3) |            |            | Days from Most Recent Vaccine Dose to Index Date among Vaccinated, Median (Q1-Q3) |            |            |
|-----------------------------|-------------------------------------------------------------------------------------------------|------------|------------|-----------------------------------------------------------------------------------|------------|------------|
|                             | All                                                                                             | Negatives  | Positives  | All                                                                               | Negatives  | Positives  |
| <u>Hospitalizations</u>     |                                                                                                 |            |            |                                                                                   |            |            |
| Unvaccinated                | 39 (16-70)                                                                                      | 40 (16-71) | 38 (14-67) |                                                                                   |            |            |
| Either mRNA vaccine         |                                                                                                 |            |            |                                                                                   |            |            |
| Partially 1-Dose Vaccinated |                                                                                                 |            |            | 24 (18-39)                                                                        | 25 (19-41) | 20 (16-27) |
| Partially 2-Dose Vaccinated |                                                                                                 |            |            | 8 (4-11)                                                                          | 8 (4-11)   | 6 (3-10)   |
| Full 2-dose mRNA Vaccinated |                                                                                                 |            |            | 53 (33-75)                                                                        | 53 (33-75) | 56 (36-78) |
| BioNTech-Pfizer             |                                                                                                 |            |            |                                                                                   |            |            |
| Partially 1-Dose Vaccinated |                                                                                                 |            |            | 21 (17-39)                                                                        | 22 (18-43) | 19 (16-26) |
| Partially 2-Dose Vaccinated |                                                                                                 |            |            | 8 (4-11)                                                                          | 8 (4-11)   | 6 (4-10)   |
| Full 2-dose Vaccinated      |                                                                                                 |            |            | 53 (33-76)                                                                        | 53 (33-75) | 57 (37-82) |
| Moderna                     |                                                                                                 |            |            |                                                                                   |            |            |
| Partially 1-Dose Vaccinated |                                                                                                 |            |            | 26 (20-39)                                                                        | 26 (20-40) | 21 (16-28) |
| Partially 2-Dose Vaccinated |                                                                                                 |            |            | 7 (4-11)                                                                          | 7 (4-11)   | 6 (2-9)    |
| Full 2-dose Vaccinated      |                                                                                                 |            |            | 52 (33-75)                                                                        | 52 (33-75) | 53 (34-73) |
| Johnson & Johnson           |                                                                                                 |            |            |                                                                                   |            |            |
| Full 1-dose Vaccinated      |                                                                                                 |            |            | 42 (28-61)                                                                        | 42 (28-61) | 38 (25-54) |
| <u>ICU Admissions</u>       |                                                                                                 |            |            |                                                                                   |            |            |
| Either mRNA vaccine         |                                                                                                 |            |            |                                                                                   |            |            |
| Partially 1-Dose Vaccinated |                                                                                                 |            |            | 23 (18-37)                                                                        | 24 (19-38) | 20 (17-25) |
| Partially 2-Dose Vaccinated |                                                                                                 |            |            | 8 (4-11)                                                                          | 8 (5-11)   | 4 (3-8)    |
| Full 2-dose mRNA Vaccinated |                                                                                                 |            |            | 52 (34-73)                                                                        | 52 (34-73) | 61 (36-89) |
| <u>ED/UC</u>                |                                                                                                 |            |            |                                                                                   |            |            |
| Unvaccinated                | 39 (15-70)                                                                                      | 38 (15-70) | 40 (14-70) |                                                                                   |            |            |



|                             |            |            |            |
|-----------------------------|------------|------------|------------|
| Either mRNA vaccine         |            |            |            |
| Partially 1-Dose Vaccinated | 22 (18-29) | 23 (18-30) | 19 (16-24) |
| Partially 2-Dose Vaccinated | 7 (4-10)   | 7 (4-10)   | 6 (4-8)    |
| Full 2-dose mRNA Vaccinated | 50 (31-73) | 49 (31-73) | 64 (39-88) |
| BioNTech-Pfizer             |            |            |            |
| Partially 1-Dose Vaccinated | 20 (17-27) | 21 (17-28) | 19 (16-23) |
| Partially 2-Dose Vaccinated | 8 (4-11)   | 8 (4-11)   | 6 (2-8)    |
| Full 2-dose Vaccinated      | 50 (31-74) | 50 (31-73) | 70 (42-97) |
| Moderna                     |            |            |            |
| Partially 1-Dose Vaccinated | 24 (19-30) | 24 (19-30) | 19 (16-27) |
| Partially 2-Dose Vaccinated | 7 (3-10)   | 7 (3-10)   | 5 (4-8)    |
| Full 2-dose Vaccinated      | 49 (31-72) | 49 (31-72) | 52 (31-65) |
| Johnson & Johnson           |            |            |            |
| Full 1-dose Vaccinated      | 44 (27-64) | 44 (27-64) | 42 (26-64) |

**Table S5. Inclusion and exclusion for ED/UC analytic sample****Panel A. Inclusion and Exclusion Table**

|                                                                                           | <b>Emergency department (ED) and urgent care (UC) medical events analytic sample</b> |           |             |           |
|-------------------------------------------------------------------------------------------|--------------------------------------------------------------------------------------|-----------|-------------|-----------|
|                                                                                           | <b>Combined Sample</b>                                                               | <b>IH</b> | <b>KPNW</b> | <b>RG</b> |
| Encounters/events among adults age 50 years and older with CLI diagnosis                  | 121,709                                                                              | 47,877    | 24,817      | 49,015    |
| EXCLUDE adults with encounters/events prior to age-specific inclusion dates               | <44,334>                                                                             | <16,543>  | <12,277>    | <15,514>  |
| Encounters/events among vaccine eligible adults                                           | 77,375                                                                               | 31,334    | 12,540      | 33,501    |
| EXCLUDE if days from discharge are less than lag time for vaccine record update           | <1,155>                                                                              | <0>       | <321>       | <834>     |
| Encounters/events among vaccine eligible adults with updated vaccine records              | 76,220                                                                               | 31,334    | 12,219      | 32,667    |
| EXCLUDE repeat encounters within 24 hours now combined into single events                 | <489>                                                                                | <332>     | <69>        | <88>      |
| Unique adult encounters/events among vaccine eligible adults with updated vaccine records | 75,731                                                                               | 31,002    | 12,150      | 32,579    |
| EXCLUDE no molecular SARS-CoV-2 testing <14 days to 72-hours after visit                  | <52,859>                                                                             | <21,385>  | <7,191>     | <24,283>  |
| Encounters/events among vaccine eligible with updated records and clinically tested       | 22,872                                                                               | 9,617     | 4,959       | 8,296     |
| EXCLUDE patients receiving dose-1 <14 days prior to index visit date                      | <1,350>                                                                              | <624>     | <277>       | <449>     |
| Analytic sample of or encounters/events including all COVID-19 vaccines                   | 21,522                                                                               | 8,993     | 4,682       | 7,847     |

Foot notes:

IH: Intermountain Healthcare

KPNW: Kaiser Permanente Northwest

RG: Regenstrief Institute

**Panel B. Flowcharts for inclusion and exclusion into samples of COVID-19-associated emergency department and urgent care (ED/UC) encounters**

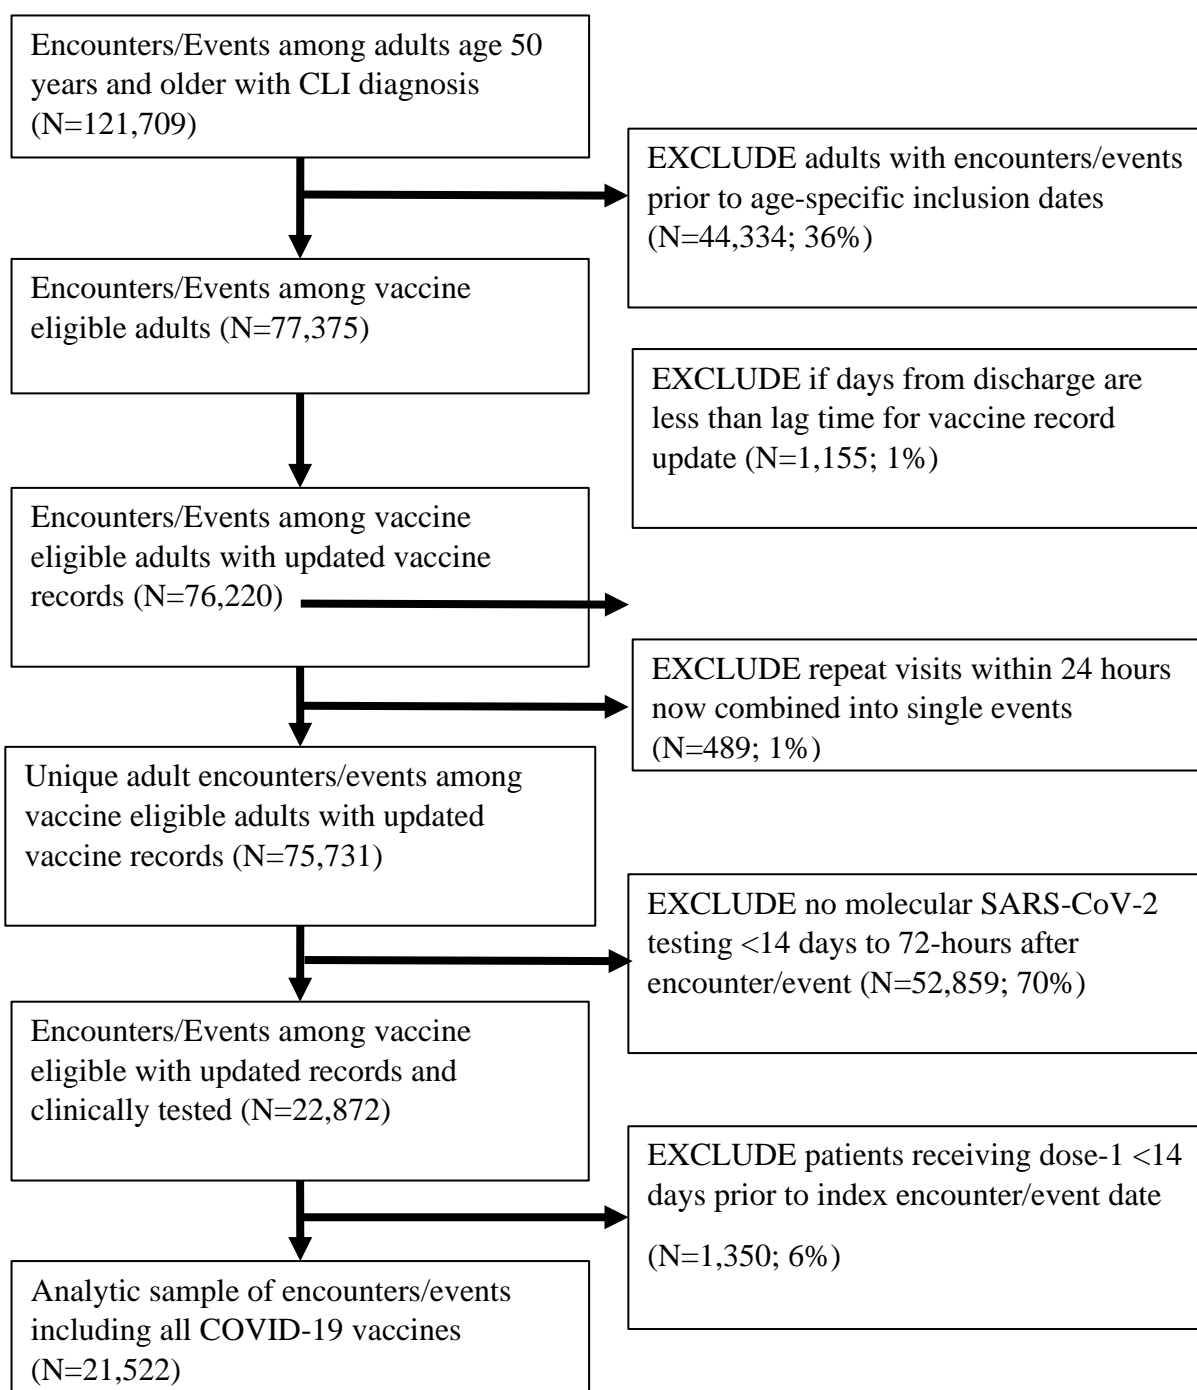

**Tables S6-S11: Characteristics by Site**

**Table S6. Characteristics of adults with medically attended COVID-19-like illness and the percent with laboratory-confirmed SARS-CoV-2 infection and percent unvaccinated, partially vaccinated with messenger RNA (mRNA) vaccines, or fully vaccinated with mRNA or Ad26.COV2.S vaccines, COLUMBIA UNIVERSITY**

|                                                  | <b>Total Medical<br/>Events</b> | <b>SARS-CoV-2<br/>Negatives</b> | <b>SARS-CoV-2<br/>Positives</b> | <b>SMD</b> | <b>Unvaccinated</b> | <b>Partially<br/>mRNA<br/>Vaccinated<br/>(1 dose)<sup>1</sup></b> | <b>Partially<br/>mRNA<br/>Vaccinated<br/>(2 doses)<sup>2</sup></b> | <b>Fully mRNA<br/>Vaccinated<sup>3</sup></b> | <b>Fully<br/>Ad26.COV2.S<br/>Vaccinated<sup>3</sup></b> | <b>SMD<sup>4</sup></b> |
|--------------------------------------------------|---------------------------------|---------------------------------|---------------------------------|------------|---------------------|-------------------------------------------------------------------|--------------------------------------------------------------------|----------------------------------------------|---------------------------------------------------------|------------------------|
|                                                  | N (Col. %)                      | N (Row %)                       | N (Row %)                       |            | N (Row %)           | N (Row %)                                                         | N (Row %)                                                          | N (Row %)                                    | N (Row %)                                               |                        |
| <b>A. Hospitalizations</b>                       |                                 |                                 |                                 |            |                     |                                                                   |                                                                    |                                              |                                                         |                        |
| All hospitalizations                             | 3126 (100)                      | 2458 (79)                       | 668 (21)                        |            | 2181 (70)           | 216 (7)                                                           | 103 (3)                                                            | 588 (19)                                     | 38 (1)                                                  |                        |
| Month of hospitalization index date <sup>5</sup> |                                 |                                 |                                 | 0.94       |                     |                                                                   |                                                                    |                                              |                                                         | 0.56                   |
| January                                          | 203 (6)                         | 109 (54)                        | 94 (46)                         |            | 196 (97)            | 5 (2)                                                             | 1 (0)                                                              | 1 (0)                                        | 0 (0)                                                   |                        |
| February                                         | 593 (19)                        | 359 (61)                        | 234 (39)                        |            | 499 (84)            | 50 (8)                                                            | 33 (6)                                                             | 11 (2)                                       | 0 (0)                                                   |                        |
| March                                            | 634 (20)                        | 468 (74)                        | 166 (26)                        |            | 424 (67)            | 56 (9)                                                            | 35 (6)                                                             | 118 (19)                                     | 1 (0)                                                   |                        |
| April                                            | 776 (25)                        | 651 (84)                        | 125 (16)                        |            | 506 (65)            | 49 (6)                                                            | 26 (3)                                                             | 185 (24)                                     | 10 (1)                                                  |                        |
| May                                              | 753 (24)                        | 708 (94)                        | 45 (6)                          |            | 458 (61)            | 46 (6)                                                            | 8 (1)                                                              | 215 (29)                                     | 26 (3)                                                  |                        |
| June                                             | 167 (5)                         | 163 (98)                        | 4 (2)                           |            | 98 (59)             | 10 (6)                                                            | 0 (0)                                                              | 58 (35)                                      | 1 (1)                                                   |                        |
| Site-regions                                     |                                 |                                 |                                 |            |                     |                                                                   |                                                                    |                                              |                                                         |                        |
| Site-region 1                                    | 3126 (100)                      | 2458 (79)                       | 668 (21)                        |            | 2181 (70)           | 216 (7)                                                           | 103 (3)                                                            | 588 (19)                                     | 38 (1)                                                  |                        |
| Age groups                                       |                                 |                                 |                                 | 0.31       |                     |                                                                   |                                                                    |                                              |                                                         | 0.08                   |
| 50-64 years                                      | 573 (18)                        | 507 (88)                        | 66 (12)                         |            | 415 (72)            | 44 (8)                                                            | 13 (2)                                                             | 89 (16)                                      | 12 (2)                                                  |                        |
| 65-74 years                                      | 1010 (32)                       | 786 (78)                        | 224 (22)                        |            | 721 (71)            | 59 (6)                                                            | 32 (3)                                                             | 192 (19)                                     | 6 (1)                                                   |                        |
| 75-84 years                                      | 932 (30)                        | 701 (75)                        | 231 (25)                        |            | 631 (68)            | 67 (7)                                                            | 32 (3)                                                             | 189 (20)                                     | 13 (1)                                                  |                        |
| ≥85 years                                        | 611 (20)                        | 464 (76)                        | 147 (24)                        |            | 414 (68)            | 46 (8)                                                            | 26 (4)                                                             | 118 (19)                                     | 7 (1)                                                   |                        |
| Race (regardless of ethnicity)                   |                                 |                                 |                                 | 0.29       |                     |                                                                   |                                                                    |                                              |                                                         | 0.22                   |
| White                                            | 869 (28)                        | 719 (83)                        | 150 (17)                        |            | 540 (62)            | 66 (8)                                                            | 40 (5)                                                             | 211 (24)                                     | 12 (1)                                                  |                        |
| Black                                            | 659 (21)                        | 555 (84)                        | 104 (16)                        |            | 484 (73)            | 50 (8)                                                            | 14 (2)                                                             | 100 (15)                                     | 11 (2)                                                  |                        |
| Other <sup>6</sup>                               | 29 (1)                          | 22 (76)                         | 7 (24)                          |            | 17 (59)             | 0 (0)                                                             | 4 (14)                                                             | 8 (28)                                       | 0 (0)                                                   |                        |
| Unknown                                          | 1569 (50)                       | 1162 (74)                       | 407 (26)                        |            | 1140 (73)           | 100 (6)                                                           | 45 (3)                                                             | 269 (17)                                     | 15 (1)                                                  |                        |
| Ethnicity (regardless of race)                   |                                 |                                 |                                 | 0.26       |                     |                                                                   |                                                                    |                                              |                                                         | 0.15                   |
| Hispanic                                         | 1430 (46)                       | 1067 (75)                       | 363 (25)                        |            | 964 (67)            | 104 (7)                                                           | 51 (4)                                                             | 299 (21)                                     | 12 (1)                                                  |                        |
| Non-Hispanic                                     | 1182 (38)                       | 993 (84)                        | 189 (16)                        |            | 819 (69)            | 82 (7)                                                            | 37 (3)                                                             | 222 (19)                                     | 22 (2)                                                  |                        |
| Unknown                                          | 514 (16)                        | 398 (77)                        | 116 (23)                        |            | 398 (77)            | 30 (6)                                                            | 15 (3)                                                             | 67 (13)                                      | 4 (1)                                                   |                        |

|                                                                |           |           |          |       |            |          |         |          |          |       |
|----------------------------------------------------------------|-----------|-----------|----------|-------|------------|----------|---------|----------|----------|-------|
| Underlying respiratory condition at discharge                  |           |           |          | -0.13 |            |          |         |          |          | 0.06  |
| Chronic respiratory condition <sup>7</sup>                     | 2394 (77) | 1913 (80) | 481 (20) |       | 1654 (69)  | 173 (7)  | 85 (4)  | 453 (19) | 29 (1)   |       |
| None                                                           | 732 (23)  | 545 (74)  | 187 (26) |       | 527 (72)   | 43 (6)   | 18 (2)  | 135 (18) | 9 (1)    |       |
| Underlying non-respiratory condition at discharge              |           |           |          | -0.06 |            |          |         |          |          | 0.10  |
| Chronic non-respiratory condition <sup>8</sup>                 | 3098 (99) | 2439 (79) | 659 (21) |       | 2156 (70)  | 216 (7)  | 103 (3) | 585 (19) | 38 (1)   |       |
| None                                                           | 28 (1)    | 19 (68)   | 9 (32)   |       | 25 (89)    | 0 (0)    | 0 (0)   | 3 (11)   | 0 (0)    |       |
| COVID-19-like illness (CLI) ICD discharge codes                |           |           |          | 0.78  |            |          |         |          |          | -0.11 |
| ≥1 CLI clinical diagnosis code <sup>9</sup>                    | 2537 (81) | 1870 (74) | 667 (26) |       | 1798 (71)  | 176 (7)  | 82 (3)  | 451 (18) | 30 (1)   |       |
| No clinical diagnosis but ≥1 CLI sign or symptom <sup>10</sup> | 589 (19)  | 588 (100) | 1 (0)    |       | 383 (65)   | 40 (7)   | 21 (4)  | 137 (23) | 8 (1)    |       |
| CLI diagnosis and placement among discharge codes              |           |           |          | 0.21  |            |          |         |          |          | -0.04 |
| CLI is first or primary diagnosis                              | 2414 (77) | 1854 (77) | 560 (23) |       | 1696 (70)  | 173 (7)  | 80 (3)  | 431 (18) | 34 (1)   |       |
| CLI is not first or primary diagnosis                          | 712 (23)  | 604 (85)  | 108 (15) |       | 485 (68)   | 43 (6)   | 23 (3)  | 157 (22) | 4 (1)    |       |
| Intensive care unit (ICU) admissions                           |           |           |          | -0.07 |            |          |         |          |          | -0.11 |
| Admitted to ICU                                                | 506 (16)  | 411 (81)  | 95 (19)  |       | 379 (75)   | 33 (7)   | 11 (2)  | 73 (14)  | 10 (2)   |       |
| Not in ICU during hospitalization                              | 2620 (84) | 2047 (78) | 573 (22) |       | 1802 (69)  | 183 (7)  | 92 (4)  | 515 (20) | 28 (1)   |       |
| COVID-19 Vaccinations                                          |           |           |          | 0.62  |            |          |         |          |          |       |
| Unvaccinated                                                   | 2181 (70) | 1586 (73) | 595 (27) |       | 2181 (100) | 0 (0)    | 0 (0)   | 0 (0)    | 0 (0)    |       |
| BNT162b2 (Pfizer-BioNTech)                                     | 671 (21)  | 609 (91)  | 62 (9)   |       | 0 (0)      | 140 (21) | 79 (12) | 452 (67) | 0 (0)    |       |
| mRNA-1273 (Moderna)                                            | 236 (8)   | 226 (96)  | 10 (4)   |       | 0 (0)      | 76 (32)  | 24 (10) | 136 (58) | 0 (0)    |       |
| Ad26.COV2.S (Johnson & Johnson)                                | 38 (1)    | 37 (97)   | 1 (3)    |       | 0 (0)      | 0 (0)    | 0 (0)   | 0 (0)    | 38 (100) |       |

## Footnote:

Note: All patients with indeterminate immunization status (receipt of dose-1 of mRNA vaccine 1-13 days prior to index test date) were excluded from table.

Abbreviations: Standard Mean Difference (SMD), COVID-like Illness (CLI), International Classification of Disease (ICD), Intensive Care Unit (ICU), Emergency Department (ED), Urgent Care (UC)

<sup>1</sup>Partially vaccinated with 1 dose: patients received dose-1 of mRNA vaccine ≥ 14 days prior to the index text date, had not received dose-2 by the index test date.

<sup>2</sup>Partially vaccinated with 2 doses: patients received dose-1 and dose-2 of mRNA vaccine, dose-2 receipt date 1-13 days prior to index date.

<sup>3</sup>Fully vaccinated: patients received single dose of J&J vaccine, dose-1 and dose-2 of mRNA vaccine, dose-2 of mRNA vaccine ≥ 14 days prior to the index text date.

<sup>4</sup>Standard Mean Difference (SMD) calculation compares unvaccinated to any receipt of vaccine (partial dose-1, partial dose-2 and full vaccination).

<sup>5</sup>Index date for each medical encounter was defined as the date of respiratory specimen collection associated with the most recent positive or negative SARS-CoV-2 test result prior to the medical encounter or the date of the medical encounter if testing only occurred after the admission or encounter date.

<sup>6</sup>Other race include: Asian, Hawaiian or Other Pacific islander, American Indian or Alaskan Native, Other not-listed and multi-race.

<sup>7</sup>Underlying chronic respiratory conditions include: asthma, chronic obstructive pulmonary disease (COPD), other lung disease.

<sup>8</sup>Underlying chronic non-respiratory conditions include: heart failure, ischemic heart disease, hypertension, other heart disease, stroke, other cerebrovascular disease, diabetes (type 1, 2 and due to other specified conditions), other metabolic disease, clinical obesity, clinically underweight, renal disease, liver disease, blood disorder, other immunosuppressive conditions, organ transplant recipient, cancer, dementia, neurological/musculoskeletal disorder or Down's syndrome.

<sup>9</sup>CLI clinical discharge diagnosis codes include: COVID-19 U codes, COVID-19 pneumonia, influenza pneumonia, other viral pneumonia, pneumonia and influenza (bacterial and other) influenza diseases, acute respiratory distress syndrome (ARDS), COPD exacerbation, asthma exacerbation, respiratory failure, other acute lower respiratory tract infection, sinusitis, acute upper respiratory tract infection.

<sup>10</sup>CLI signs and symptoms include: hemoptysis, cough, dyspnea unspecified, chest pain or breathing/painful respiration, asphyxia, hypoxemia, pleurisy, respiratory arrest, abnormal sputum, other specified symptoms and signs involving the circulatory and respiratory systems, fever, chills (without fever), diarrhea, disturbance of taste or smell, headache, myalgia, sepsis, other malaise, other fatigue, shock (unspecified), debility (unspecified), altered level of consciousness /mental state, weakness, nausea and vomiting, rash or other nonspecific skin eruption, abdominal pain

**Table S7. Characteristics of adults with medically attended COVID-19-like illness and the percent with laboratory-confirmed SARS-CoV-2 infection and percent unvaccinated, partially vaccinated with messenger RNA (mRNA) vaccines, or fully vaccinated with mRNA or Ad26.COVS vaccines, for combined HEALTHPARTNERS and KAISER PERMANENTE NORTHWEST encounters (due to small cell sizes)**

|                                                  | Total Medical<br>Events<br>N (Col. %) | SARS-CoV-2<br>Negatives<br>N (Row %) | SARS-CoV-2<br>Positives<br>N (Row %) | SMD  | Unvaccinated<br>N (Row %) | Partially<br>mRNA<br>Vaccinated<br>(1 dose) <sup>1</sup><br>N (Row %) | Partially<br>mRNA<br>Vaccinated<br>(2 doses) <sup>2</sup><br>N (Row %) | Fully mRNA<br>Vaccinated <sup>3</sup><br>N (Row %) | Fully<br>Ad26.COVS<br>Vaccinated <sup>3</sup><br>N (Row %) | SMD <sup>4</sup> |
|--------------------------------------------------|---------------------------------------|--------------------------------------|--------------------------------------|------|---------------------------|-----------------------------------------------------------------------|------------------------------------------------------------------------|----------------------------------------------------|------------------------------------------------------------|------------------|
| <b>A. Hospitalizations</b>                       |                                       |                                      |                                      |      |                           |                                                                       |                                                                        |                                                    |                                                            |                  |
| All hospitalizations                             | 2941 (100)                            | 2762 (94)                            | 179 (6)                              |      | 1295 (44)                 | 308 (10)                                                              | 236 (8)                                                                | 1041 (35)                                          | 61 (2)                                                     |                  |
| Month of hospitalization index date <sup>5</sup> |                                       |                                      |                                      | 0.45 |                           |                                                                       |                                                                        |                                                    |                                                            | 0.48             |
| January                                          | 30 (1)                                | 29 (97)                              | <5                                   |      | 25 (83)                   | 5 (17)                                                                | <5                                                                     | <5                                                 | <5                                                         |                  |
| February                                         | 261 (9)                               | 247 (95)                             | 14 (5)                               |      | 169 (65)                  | 50 (19)                                                               | 30 (11)                                                                | 12 (5)                                             | <5                                                         |                  |
| March                                            | 866 (29)                              | 839 (97)                             | 27 (3)                               |      | 467 (54)                  | 120 (14)                                                              | 82 (9)                                                                 | 192 (22)                                           | 5 (1)                                                      |                  |
| April                                            | 983 (33)                              | 903 (92)                             | 80 (8)                               |      | 347 (35)                  | 93 (9)                                                                | 103 (10)                                                               | 410 (42)                                           | 30 (3)                                                     |                  |
| May                                              | 752 (26)                              | 696 (93)                             | 56 (7)                               |      | 272 (36)                  | 36 (5)                                                                | 21 (3)                                                                 | 400 (53)                                           | 23 (3)                                                     |                  |
| June                                             | 49 (2)                                | 48 (98)                              | <5                                   |      | 15 (31)                   | <5                                                                    | <5                                                                     | 27 (55)                                            | <5                                                         |                  |
| Site-regions                                     |                                       |                                      |                                      | 0.25 |                           |                                                                       |                                                                        |                                                    |                                                            | 0.22             |
| HealthPartners site-region 1                     | 973 (33)                              | 916 (94)                             | 57 (6)                               |      | 381 (39)                  | 93 (10)                                                               | 103 (11)                                                               | 388 (40)                                           | 8 (1)                                                      |                  |
| HealthPartners site-region 2                     | 16 (1)                                | 12 (75)                              | <5                                   |      | 8 (50)                    | 5 (31)                                                                | <5                                                                     | <5                                                 | <5                                                         |                  |
| Kaiser Permanente Northwest site-region 1        | 1376 (47)                             | 1301 (95)                            | 75 (5)                               |      | 624 (45)                  | 159 (12)                                                              | 92 (7)                                                                 | 455 (33)                                           | 46 (3)                                                     |                  |
| Kaiser Permanente Northwest site-region 2        | 394 (13)                              | 362 (92)                             | 32 (8)                               |      | 204 (52)                  | 36 (9)                                                                | 20 (5)                                                                 | 128 (32)                                           | 6 (2)                                                      |                  |
| Kaiser Permanente Northwest site-region 3        | 182 (6)                               | 171 (94)                             | 11 (6)                               |      | 78 (43)                   | 15 (8)                                                                | 20 (11)                                                                | 68 (37)                                            | <5                                                         |                  |
| Age groups                                       |                                       |                                      |                                      | 0.51 |                           |                                                                       |                                                                        |                                                    |                                                            | 0.30             |
| 50-64 years                                      | 455 (15)                              | 396 (87)                             | 59 (13)                              |      | 270 (59)                  | 29 (6)                                                                | 28 (6)                                                                 | 121 (27)                                           | 7 (2)                                                      |                  |
| 65-74 years                                      | 901 (31)                              | 844 (94)                             | 57 (6)                               |      | 402 (45)                  | 96 (11)                                                               | 77 (9)                                                                 | 302 (34)                                           | 24 (3)                                                     |                  |
| 75-84 years                                      | 985 (33)                              | 943 (96)                             | 42 (4)                               |      | 390 (40)                  | 116 (12)                                                              | 83 (8)                                                                 | 375 (38)                                           | 21 (2)                                                     |                  |
| ≥85 years                                        | 600 (20)                              | 579 (97)                             | 21 (4)                               |      | 233 (39)                  | 67 (11)                                                               | 48 (8)                                                                 | 243 (41)                                           | 9 (2)                                                      |                  |
| Race (regardless of ethnicity)                   |                                       |                                      |                                      | 0.35 |                           |                                                                       |                                                                        |                                                    |                                                            | 0.22             |
| White                                            | 2519 (86)                             | 2380 (94)                            | 139 (6)                              |      | 1077 (43)                 | 276 (11)                                                              | 193 (8)                                                                | 915 (36)                                           | 58 (2)                                                     |                  |
| Black                                            | 139 (5)                               | 119 (86)                             | 20 (14)                              |      | 78 (56)                   | 11 (8)                                                                | 7 (5)                                                                  | 42 (30)                                            | <5                                                         |                  |
| Other <sup>6</sup>                               | 207 (7)                               | 199 (96)                             | 8 (4)                                |      | 87 (42)                   | 18 (9)                                                                | 31 (15)                                                                | 69 (33)                                            | <5                                                         |                  |
| Unknown                                          | 76 (3)                                | 64 (84)                              | 12 (16)                              |      | 53 (70)                   | <5                                                                    | 5 (7)                                                                  | 15 (20)                                            | <5                                                         |                  |
| Ethnicity (regardless of race)                   |                                       |                                      |                                      | 0.21 |                           |                                                                       |                                                                        |                                                    |                                                            | 0.16             |
| Hispanic                                         | 76 (3)                                | 66 (87)                              | 10 (13)                              |      | 40 (53)                   | 6 (8)                                                                 | 12 (16)                                                                | 17 (22)                                            | <5                                                         |                  |
| Non-Hispanic                                     | 2821 (96)                             | 2656 (94)                            | 165 (6)                              |      | 1221 (43)                 | 301 (11)                                                              | 224 (8)                                                                | 1015 (36)                                          | 60 (2)                                                     |                  |

|                                                                 |            |            |          |         |            |          |          |           |          |
|-----------------------------------------------------------------|------------|------------|----------|---------|------------|----------|----------|-----------|----------|
| Unknown                                                         | 44 (1)     | 40 (91)    | <5       | 34 (77) | <5         | <5       | 9 (20)   | <5        |          |
| Underlying respiratory condition at discharge                   |            |            |          | 0.39    |            |          |          |           | -0.11    |
| Chronic respiratory condition <sup>7</sup>                      | 1813 (62)  | 1673 (92)  | 140 (8)  |         | 838 (46)   | 186 (10) | 129 (7)  | 629 (35)  | 31 (2)   |
| None                                                            | 1128 (38)  | 1089 (97)  | 39 (3)   |         | 457 (41)   | 122 (11) | 107 (9)  | 412 (37)  | 30 (3)   |
| Underlying non-respiratory condition at discharge               |            |            |          | -0.13   |            |          |          |           | 0.08     |
| Chronic non-respiratory condition <sup>8</sup>                  | 2896 (98)  | 2723 (94)  | 173 (6)  |         | 1268 (44)  | 304 (10) | 234 (8)  | 1029 (36) | 61 (2)   |
| None                                                            | 45 (2)     | 39 (87)    | 6 (13)   |         | 27 (60)    | <5       | <5       | 12 (27)   | <5       |
| COVID-19-like illness (CLI) ICD discharge codes                 |            |            |          | 1.11    |            |          |          |           | -0.14    |
| ≥1 CLI clinical diagnosis code <sup>9</sup>                     | 1790 (61)  | 1614 (90)  | 176 (10) |         | 836 (47)   | 188 (11) | 128 (7)  | 603 (34)  | 35 (2)   |
| No clinical diagnosis but ≥1 CLI sign or symptom <sup>10</sup>  | 1151 (39)  | 1148 (100) | <5       |         | 459 (40)   | 120 (10) | 108 (9)  | 438 (38)  | 26 (2)   |
| CLI diagnosis and placement among discharge codes               |            |            |          | 1.69    |            |          |          |           | -0.24    |
| CLI is first or primary diagnosis                               | 382 (13)   | 252 (66)   | 130 (34) |         | 227 (59)   | 45 (12)  | 22 (6)   | 79 (21)   | 9 (2)    |
| CLI is not first or primary diagnosis                           | 2559 (87)  | 2510 (98)  | 49 (2)   |         | 1068 (42)  | 263 (10) | 214 (8)  | 962 (38)  | 52 (2)   |
| Intensive care unit (ICU) admissions                            |            |            |          | 0.02    |            |          |          |           | -0.15    |
| Admitted to ICU                                                 | 500 (17)   | 468 (94)   | 32 (6)   |         | 262 (52)   | 47 (9)   | 42 (8)   | 146 (29)  | <5       |
| Not in ICU during hospitalization                               | 2441 (83)  | 2294 (94)  | 147 (6)  |         | 1033 (42)  | 261 (11) | 194 (8)  | 895 (37)  | 58 (2)   |
| COVID-19 Vaccinations                                           |            |            |          | 0.88    |            |          |          |           |          |
| Unvaccinated                                                    | 1295 (44)  | 1150 (89)  | 145 (11) |         | 1295 (100) | 0 (0)    | 0 (0)    | 0 (0)     | 0 (0)    |
| BNT162b2 (Pfizer-BioNTech)                                      | 1015 (35)  | 995 (98)   | 20 (2)   |         | 0 (0)      | 179 (18) | 161 (16) | 675 (67)  | 0 (0)    |
| mRNA-1273 (Moderna)                                             | 570 (19)   | 558 (98)   | 12 (2)   |         | 0 (0)      | 129 (23) | 75 (13)  | 366 (64)  | 0 (0)    |
| Ad26.COV2.S (Johnson & Johnson)                                 | 61 (2)     | 59 (97)    | <5       |         | 0 (0)      | 0 (0)    | 0 (0)    | 0 (0)     | 61 (100) |
| <b>B. Emergency Department (ED) and Urgent Care (UC) Visits</b> |            |            |          |         |            |          |          |           |          |
| All ED and UC Visits                                            | 4682 (100) | 4277 (91)  | 405 (9)  |         | 2100 (45)  | 440 (9)  | 327 (7)  | 1702 (36) | 113 (2)  |
| By medical event setting                                        |            |            |          | 0.15    |            |          |          |           | 0.15     |
| ED visits                                                       | 3180 (68)  | 2932 (92)  | 248 (8)  |         | 1507 (47)  | 299 (9)  | 223 (7)  | 1085 (34) | 66 (2)   |
| UC visits                                                       | 1502 (32)  | 1345 (90)  | 157 (10) |         | 593 (39)   | 141 (9)  | 104 (7)  | 617 (41)  | 47 (3)   |
| Month of ED/UC event index date <sup>5</sup>                    |            |            |          | 0.53    |            |          |          |           | 0.61     |
| January                                                         | 19 (0)     | 15 (79)    | <5       |         | 18 (95)    | <5       | <5       | <5        | <5       |
| February                                                        | 373 (8)    | 345 (92)   | 28 (8)   |         | 313 (84)   | 30 (8)   | 14 (4)   | 16 (4)    | <5       |
| March                                                           | 860 (18)   | 838 (97)   | 22 (3)   |         | 489 (57)   | 149 (17) | 94 (11)  | 118 (14)  | 10 (1)   |



|                                                                |           |           |          |       |           |          |          |           |         |       |
|----------------------------------------------------------------|-----------|-----------|----------|-------|-----------|----------|----------|-----------|---------|-------|
| April                                                          | 1239 (26) | 1134 (92) | 105 (8)  |       | 471 (38)  | 128 (10) | 138 (11) | 471 (38)  | 31 (3)  |       |
| May                                                            | 1814 (39) | 1600 (88) | 214 (12) |       | 684 (38)  | 111 (6)  | 71 (4)   | 894 (49)  | 54 (3)  |       |
| June                                                           | 377 (8)   | 345 (92)  | 32 (8)   |       | 125 (33)  | 21 (6)   | 10 (3)   | 203 (54)  | 18 (5)  |       |
| Site-regions                                                   |           |           |          | 0.17  |           |          |          |           |         | 0.12  |
| Kaiser Permanente Northwest site-region 1                      | 2197 (47) | 2004 (91) | 193 (9)  |       | 915 (42)  | 232 (11) | 147 (7)  | 828 (38)  | 75 (3)  |       |
| Kaiser Permanente Northwest site-region 2                      | 1939 (41) | 1794 (93) | 145 (7)  |       | 916 (47)  | 155 (8)  | 144 (7)  | 697 (36)  | 27 (1)  |       |
| Kaiser Permanente Northwest site-region 3                      | 546 (12)  | 479 (88)  | 67 (12)  |       | 269 (49)  | 53 (10)  | 36 (7)   | 177 (32)  | 11 (2)  |       |
| Age groups                                                     |           |           |          | 0.52  |           |          |          |           |         | 0.18  |
| 50-64 years                                                    | 959 (20)  | 795 (83)  | 164 (17) |       | 487 (51)  | 83 (9)   | 64 (7)   | 300 (31)  | 25 (3)  |       |
| 65-74 years                                                    | 1651 (35) | 1517 (92) | 134 (8)  |       | 768 (47)  | 152 (9)  | 116 (7)  | 571 (35)  | 44 (3)  |       |
| 75-84 years                                                    | 1431 (31) | 1357 (95) | 74 (5)   |       | 564 (39)  | 143 (10) | 111 (8)  | 574 (40)  | 39 (3)  |       |
| ≥85 years                                                      | 641 (14)  | 608 (95)  | 33 (5)   |       | 281 (44)  | 62 (10)  | 36 (6)   | 257 (40)  | 5 (1)   |       |
| Race (regardless of ethnicity)                                 |           |           |          | 0.29  |           |          |          |           |         | 0.12  |
| White                                                          | 3991 (85) | 3682 (92) | 309 (8)  |       | 1755 (44) | 363 (9)  | 284 (7)  | 1490 (37) | 99 (2)  |       |
| Black                                                          | 145 (3)   | 121 (83)  | 24 (17)  |       | 80 (55)   | 16 (11)  | <5       | 46 (32)   | <5      |       |
| Other <sup>6</sup>                                             | 319 (7)   | 288 (90)  | 31 (10)  |       | 137 (43)  | 39 (12)  | 29 (9)   | 104 (33)  | 10 (3)  |       |
| Unknown                                                        | 227 (5)   | 186 (82)  | 41 (18)  |       | 128 (56)  | 22 (10)  | 12 (5)   | 62 (27)   | <5      |       |
| Ethnicity (regardless of race)                                 |           |           |          | 0.17  |           |          |          |           |         | 0.06  |
| Hispanic                                                       | 249 (5)   | 216 (87)  | 33 (13)  |       | 115 (46)  | 26 (10)  | 25 (10)  | 76 (31)   | 7 (3)   |       |
| Non-Hispanic                                                   | 4337 (93) | 3979 (92) | 358 (8)  |       | 1928 (44) | 406 (9)  | 300 (7)  | 1597 (37) | 106 (2) |       |
| Unknown                                                        | 96 (2)    | 82 (85)   | 14 (15)  |       | 57 (59)   | 8 (8)    | <5       | 29 (30)   | <5      |       |
| Underlying respiratory condition at discharge                  |           |           |          | -0.18 |           |          |          |           |         | -0.05 |
| Chronic respiratory condition <sup>7</sup>                     | 1561 (33) | 1456 (93) | 105 (7)  |       | 730 (47)  | 160 (10) | 113 (7)  | 521 (33)  | 37 (2)  |       |
| None                                                           | 3121 (67) | 2821 (90) | 300 (10) |       | 1370 (44) | 280 (9)  | 214 (7)  | 1181 (38) | 76 (2)  |       |
| Underlying non-respiratory condition at discharge              |           |           |          | -0.29 |           |          |          |           |         | -0.08 |
| Chronic non-respiratory condition <sup>8</sup>                 | 3267 (70) | 3035 (93) | 232 (7)  |       | 1509 (46) | 318 (10) | 233 (7)  | 1138 (35) | 69 (2)  |       |
| None                                                           | 1415 (30) | 1242 (88) | 173 (12) |       | 591 (42)  | 122 (9)  | 94 (7)   | 564 (40)  | 44 (3)  |       |
| COVID-19-like illness (CLI) ICD discharge codes                |           |           |          | 0.96  |           |          |          |           |         | -0.15 |
| ≥1 CLI clinical diagnosis code <sup>9</sup>                    | 2066 (44) | 1732 (84) | 334 (16) |       | 1014 (49) | 204 (10) | 132 (6)  | 665 (32)  | 51 (2)  |       |
| No clinical diagnosis but ≥1 CLI sign or symptom <sup>10</sup> | 2616 (56) | 2545 (97) | 71 (3)   |       | 1086 (42) | 236 (9)  | 195 (7)  | 1037 (40) | 62 (2)  |       |
| CLI diagnosis and placement among discharge codes              |           |           |          | 0.67  |           |          |          |           |         | -0.19 |
| CLI is first or primary diagnosis                              | 817 (17)  | 640 (78)  | 177 (22) |       | 452 (55)  | 69 (8)   | 57 (7)   | 224 (27)  | 15 (2)  |       |
| CLI is not first or primary diagnosis                          | 3865 (83) | 3637 (94) | 228 (6)  |       | 1648 (43) | 371 (10) | 270 (7)  | 1478 (38) | 98 (3)  |       |

|                                 |           |           |          |      |            |          |          |           |           |
|---------------------------------|-----------|-----------|----------|------|------------|----------|----------|-----------|-----------|
| COVID-19 Vaccinations           |           |           |          | 1.10 |            |          |          |           |           |
| Unvaccinated                    | 2100 (45) | 1746 (83) | 354 (17) |      | 2100 (100) | 0 (0)    | 0 (0)    | 0 (0)     | 0 (0)     |
| BNT162b2 (Pfizer-BioNTech)      | 1735 (37) | 1696 (98) | 39 (2)   |      | 0 (0)      | 266 (15) | 237 (14) | 1232 (71) | 0 (0)     |
| mRNA-1273 (Moderna)             | 734 (16)  | 726 (99)  | 8 (1)    |      | 0 (0)      | 174 (24) | 90 (12)  | 470 (64)  | 0 (0)     |
| Ad26.COV2.S (Johnson & Johnson) | 113 (2)   | 109 (96)  | <5       |      | 0 (0)      | 0 (0)    | 0 (0)    | 0 (0)     | 113 (100) |

Note: All patients with indeterminate immunization status (receipt of dose-1 of mRNA vaccine 1-13 days prior to index test date) were excluded from table.

Abbreviations: Standard Mean Difference (SMD), COVID-like Illness (CLI), International Classification of Disease (ICD), Intensive Care Unit (ICU), Emergency Department (ED), Urgent Care (UC)

<sup>1</sup>Partially vaccinated with 1 dose: patients received dose-1 of mRNA vaccine  $\geq$  14 days prior to the index text date, had not received dose-2 by the index test date.

<sup>2</sup>Partially vaccinated with 2 doses: patients received dose-1 and dose-2 of mRNA vaccine, dose-2 receipt date 1-13 days prior to index date.

<sup>3</sup>Fully vaccinated: patients received single dose of J&J vaccine, dose-1 and dose-2 of mRNA vaccine, dose-2 of mRNA vaccine  $\geq$  14 days prior to the index text date.

<sup>4</sup>Standard Mean Difference (SMD) calculation compares unvaccinated to any receipt of vaccine (partial dose-1, partial dose-2 and full vaccination).

<sup>5</sup>Index date for each medical encounter was defined as the date of respiratory specimen collection associated with the most recent positive or negative SARS-CoV-2 test result prior to the medical encounter or the date of the medical encounter if testing only occurred after the admission or encounter date.

<sup>6</sup>Other race include Asian, Hawaiian or Other Pacific islander, American Indian or Alaskan Native, Other not-listed and multi-race.

<sup>7</sup>Underlying chronic respiratory conditions include asthma, chronic obstructive pulmonary disease (COPD), other lung disease.

<sup>8</sup>Underlying chronic non-respiratory conditions include heart failure, ischemic heart disease, hypertension, other heart disease, stroke, other cerebrovascular disease, diabetes (type 1, 2 and due to other specified conditions), other metabolic disease, clinical obesity, clinically underweight, renal disease, liver disease, blood disorder, other immunosuppressive conditions, organ transplant recipient, cancer, dementia, neurological/musculoskeletal disorder or Down's syndrome.

<sup>9</sup>CLI clinical discharge diagnosis codes include: COVID-19 U codes, COVID-19 pneumonia, influenza pneumonia, other viral pneumonia, pneumonia and influenza (bacterial and other) influenza diagnoses, acute respiratory distress syndrome (ARDS), COPD exacerbation, asthma exacerbation, respiratory failure, other acute lower respiratory tract infection, sinusitis, acute upper respiratory tract infection.

<sup>10</sup>CLI signs and symptoms include: hemoptysis, cough, dyspnea unspecified, chest pain or breathing/painful respiration, asphyxia, hypoxemia, pleurisy, respiratory arrest, abnormal sputum, other specified symptoms and signs involving the circulatory and respiratory systems, fever, chills (without fever), diarrhea, disturbance of taste or smell, headache, myalgia, sepsis, other malaise, other fatigue, shock (unspecified), debility (unspecified), altered level of consciousness/mental state, weakness, nausea and vomiting, rash or other nonspecific skin eruption, abdominal pain

**Table S8. Characteristics of adults with medically attended COVID-19-like illness and the percent with laboratory-confirmed SARS-CoV-2 infection and percent unvaccinated, partially vaccinated with messenger RNA (mRNA) vaccines, or fully vaccinated with mRNA or Ad26.COVID.2.S vaccines, INTERMOUNTAIN HEALTHCARE**

|                                                  | Total Medical<br>Events | SARS-CoV-2<br>Negatives | SARS-CoV-2<br>Positives | SMD  | Unvaccinated | Partially<br>mRNA<br>Vaccinated<br>(1 dose) <sup>1</sup> | Partially<br>mRNA<br>Vaccinated<br>(2 doses) <sup>2</sup> | Fully mRNA<br>Vaccinated <sup>3</sup> | Fully Ad26.COVID.2.S<br>Vaccinated <sup>3</sup> | SMD <sup>4</sup> |
|--------------------------------------------------|-------------------------|-------------------------|-------------------------|------|--------------|----------------------------------------------------------|-----------------------------------------------------------|---------------------------------------|-------------------------------------------------|------------------|
|                                                  | N (Col. %)              | N (Row %)               | N (Row %)               |      | N (Row %)    | N (Row %)                                                | N (Row %)                                                 | N (Row %)                             | N (Row %)                                       |                  |
| <b>A. Hospitalizations</b>                       |                         |                         |                         |      |              |                                                          |                                                           |                                       |                                                 |                  |
| All hospitalizations                             | 3910 (100)              | 3353 (86)               | 557 (14)                |      | 1917 (49)    | 392 (10)                                                 | 278 (7)                                                   | 1236 (32)                             | 87 (2)                                          |                  |
| Month of hospitalization index date <sup>5</sup> |                         |                         |                         | 0.25 |              |                                                          |                                                           |                                       |                                                 | 0.34             |
| February                                         | 24 (1)                  | 16 (67)                 | 8 (33)                  |      | 23 (96)      | 0 (0)                                                    | 1 (4)                                                     | 0 (0)                                 | 0 (0)                                           |                  |
| March                                            | 557 (14)                | 450 (81)                | 107 (19)                |      | 369 (66)     | 104 (19)                                                 | 60 (11)                                                   | 24 (4)                                | 0 (0)                                           |                  |
| April                                            | 914 (23)                | 798 (87)                | 116 (13)                |      | 446 (49)     | 130 (14)                                                 | 104 (11)                                                  | 225 (25)                              | 9 (1)                                           |                  |
| May                                              | 1062 (27)               | 932 (88)                | 130 (12)                |      | 480 (45)     | 81 (8)                                                   | 81 (8)                                                    | 393 (37)                              | 27 (3)                                          |                  |
| June                                             | 965 (25)                | 832 (86)                | 133 (14)                |      | 437 (45)     | 57 (6)                                                   | 29 (3)                                                    | 409 (42)                              | 33 (3)                                          |                  |
| Site-regions                                     | 388 (10)                | 325 (84)                | 63 (16)                 | 0.27 | 162 (42)     | 20 (5)                                                   | 3 (1)                                                     | 185 (48)                              | 18 (5)                                          | 0.20             |
| Site-region 1                                    | 248 (6)                 | 219 (88)                | 29 (12)                 |      | 133 (54)     | 19 (8)                                                   | 16 (6)                                                    | 71 (29)                               | 9 (4)                                           |                  |
| Site-region 2                                    | 238 (6)                 | 204 (86)                | 34 (14)                 |      | 101 (42)     | 27 (11)                                                  | 13 (5)                                                    | 93 (39)                               | 4 (2)                                           |                  |
| Site-region 3                                    | 1434 (37)               | 1253 (87)               | 181 (13)                |      | 654 (46)     | 147 (10)                                                 | 95 (7)                                                    | 510 (36)                              | 28 (2)                                          |                  |
| Site-region 4                                    | 721 (18)                | 630 (87)                | 91 (13)                 |      | 340 (47)     | 66 (9)                                                   | 52 (7)                                                    | 257 (36)                              | 6 (1)                                           |                  |
| Site-region 5                                    | 67 (2)                  | 58 (87)                 | 9 (13)                  |      | 34 (51)      | 6 (9)                                                    | 9 (13)                                                    | 17 (25)                               | 1 (1)                                           |                  |
| Site-region 6                                    | 479 (12)                | 411 (86)                | 68 (14)                 |      | 245 (51)     | 51 (11)                                                  | 38 (8)                                                    | 133 (28)                              | 12 (3)                                          |                  |
| Site-region 7                                    | 74 (2)                  | 61 (82)                 | 13 (18)                 |      | 37 (50)      | 7 (9)                                                    | 9 (12)                                                    | 20 (27)                               | 1 (1)                                           |                  |
| Site-region 8                                    | 649 (17)                | 517 (80)                | 132 (20)                |      | 373 (57)     | 69 (11)                                                  | 46 (7)                                                    | 135 (21)                              | 26 (4)                                          |                  |
| Age groups                                       |                         |                         |                         | 0.27 |              |                                                          |                                                           |                                       |                                                 | 0.34             |
| 50-64 years                                      | 1036 (26)               | 843 (81)                | 193 (19)                |      | 633 (61)     | 85 (8)                                                   | 56 (5)                                                    | 221 (21)                              | 41 (4)                                          |                  |
| 65-74 years                                      | 1184 (30)               | 1010 (85)               | 174 (15)                |      | 595 (50)     | 121 (10)                                                 | 75 (6)                                                    | 368 (31)                              | 25 (2)                                          |                  |
| 75-84 years                                      | 1135 (29)               | 996 (88)                | 139 (12)                |      | 484 (43)     | 130 (11)                                                 | 96 (8)                                                    | 411 (36)                              | 14 (1)                                          |                  |
| ≥85 years                                        | 555 (14)                | 504 (91)                | 51 (9)                  |      | 205 (37)     | 56 (10)                                                  | 51 (9)                                                    | 236 (43)                              | 7 (1)                                           |                  |
| Race (regardless of ethnicity)                   |                         |                         |                         | 0.18 |              |                                                          |                                                           |                                       |                                                 | 0.19             |
| White                                            | 3608 (92)               | 3117 (86)               | 491 (14)                |      | 1733 (48)    | 364 (10)                                                 | 261 (7)                                                   | 1174 (33)                             | 76 (2)                                          |                  |
| Black                                            | 26 (1)                  | 20 (77)                 | 6 (23)                  |      | 19 (73)      | 1 (4)                                                    | 0 (0)                                                     | 4 (15)                                | 2 (8)                                           |                  |
| Other <sup>6</sup>                               | 142 (4)                 | 116 (82)                | 26 (18)                 |      | 82 (58)      | 16 (11)                                                  | 11 (8)                                                    | 29 (20)                               | 4 (3)                                           |                  |
| Unknown                                          | 134 (3)                 | 100 (75)                | 34 (25)                 |      | 83 (62)      | 11 (8)                                                   | 6 (4)                                                     | 29 (22)                               | 5 (4)                                           |                  |

|                                                                |           |            |          |       |            |          |          |           |          |       |
|----------------------------------------------------------------|-----------|------------|----------|-------|------------|----------|----------|-----------|----------|-------|
| Ethnicity (regardless of race)                                 |           |            |          | 0.30  |            |          |          |           |          | 0.20  |
| Hispanic                                                       | 276 (7)   | 198 (72)   | 78 (28)  |       | 179 (65)   | 26 (9)   | 18 (7)   | 47 (17)   | 6 (2)    |       |
| Non-Hispanic                                                   | 3510 (90) | 3059 (87)  | 451 (13) |       | 1662 (47)  | 358 (10) | 252 (7)  | 1161 (33) | 77 (2)   |       |
| Unknown                                                        | 124 (3)   | 96 (77)    | 28 (23)  |       | 76 (61)    | 8 (6)    | 8 (6)    | 28 (23)   | 4 (3)    |       |
| Underlying respiratory condition at discharge                  |           |            |          | -0.03 |            |          |          |           |          | 0.08  |
| Chronic respiratory condition <sup>7</sup>                     | 2394 (61) | 2061 (86)  | 333 (14) |       | 1135 (47)  | 241 (10) | 168 (7)  | 791 (33)  | 59 (2)   |       |
| None                                                           | 1516 (39) | 1292 (85)  | 224 (15) |       | 782 (52)   | 151 (10) | 110 (7)  | 445 (29)  | 28 (2)   |       |
| Underlying non-respiratory condition at discharge              |           |            |          | -0.22 |            |          |          |           |          | 0.11  |
| Chronic non-respiratory condition <sup>8</sup>                 | 3706 (95) | 3205 (86)  | 501 (14) |       | 1793 (48)  | 374 (10) | 267 (7)  | 1192 (32) | 80 (2)   |       |
| None                                                           | 204 (5)   | 148 (73)   | 56 (27)  |       | 124 (61)   | 18 (9)   | 11 (5)   | 44 (22)   | 7 (3)    |       |
| COVID-19-like illness (CLI) ICD discharge codes                |           |            |          | 1.01  |            |          |          |           |          | -0.10 |
| ≥1 CLI clinical diagnosis code <sup>9</sup>                    | 2725 (70) | 2172 (80)  | 553 (20) |       | 1379 (51)  | 260 (10) | 191 (7)  | 836 (31)  | 59 (2)   |       |
| No clinical diagnosis but ≥1 CLI sign or symptom <sup>10</sup> | 1185 (30) | 1181 (100) | 4 (0)    |       | 538 (45)   | 132 (11) | 87 (7)   | 400 (34)  | 28 (2)   |       |
| CLI diagnosis and placement among discharge codes              |           |            |          | 0.78  |            |          |          |           |          | -0.10 |
| CLI is first or primary diagnosis                              | 1552 (40) | 1157 (75)  | 395 (25) |       | 807 (52)   | 144 (9)  | 108 (7)  | 460 (30)  | 33 (2)   |       |
| CLI is not first or primary diagnosis                          | 2358 (60) | 2196 (93)  | 162 (7)  |       | 1110 (47)  | 248 (11) | 170 (7)  | 776 (33)  | 54 (2)   |       |
| Intensive care unit (ICU) admissions                           |           |            |          | 0.14  |            |          |          |           |          | -0.08 |
| Admitted to ICU                                                | 318 (8)   | 253 (80)   | 65 (20)  |       | 176 (55)   | 28 (9)   | 23 (7)   | 88 (28)   | 3 (1)    |       |
| Not in ICU during hospitalization                              | 3592 (92) | 3100 (86)  | 492 (14) |       | 1741 (48)  | 364 (10) | 255 (7)  | 1148 (32) | 84 (2)   |       |
| COVID-19 Vaccinations                                          |           |            |          | 0.97  |            |          |          |           |          |       |
| Unvaccinated                                                   | 1917 (49) | 1446 (75)  | 471 (25) |       | 1917 (100) | 0 (0)    | 0 (0)    | 0 (0)     | 0 (0)    |       |
| BNT162b2 (Pfizer-BioNTech)                                     | 1068 (27) | 1021 (96)  | 47 (4)   |       | 0 (0)      | 200 (19) | 146 (14) | 722 (68)  | 0 (0)    |       |
| mRNA-1273 (Moderna)                                            | 838 (21)  | 803 (96)   | 35 (4)   |       | 0 (0)      | 192 (23) | 132 (16) | 514 (61)  | 0 (0)    |       |
| Ad26.COV2.S (Johnson & Johnson)                                | 87 (2)    | 83 (95)    | 4 (5)    |       | 0 (0)      | 0 (0)    | 0 (0)    | 0 (0)     | 87 (100) |       |

| <b>B. Emergency Department (ED) and Urgent Care (UC) Visits</b> |            |           |           |      |           |          |          |           |         |       |
|-----------------------------------------------------------------|------------|-----------|-----------|------|-----------|----------|----------|-----------|---------|-------|
| All ED and UC Visits                                            | 8993 (100) | 7600 (85) | 1393 (15) |      | 4612 (51) | 908 (10) | 557 (6)  | 2700 (30) | 216 (2) |       |
| By medical event setting                                        |            |           |           | 0.13 |           |          |          |           |         | -0.03 |
| ED visits                                                       | 7348 (82)  | 6272 (85) | 1076 (15) |      | 3744 (51) | 711 (10) | 461 (6)  | 2252 (31) | 180 (2) |       |
| UC visits                                                       | 1645 (18)  | 1328 (81) | 317 (19)  |      | 868 (53)  | 197 (12) | 96 (6)   | 448 (27)  | 36 (2)  |       |
| Month of ED/UC event index date <sup>5</sup>                    |            |           |           | 0.27 |           |          |          |           |         | 0.32  |
| February                                                        | 53 (1)     | 30 (57)   | 23 (43)   |      | 52 (98)   | 1 (2)    | 0 (0)    | 0 (0)     | 0 (0)   |       |
| March                                                           | 1141 (13)  | 907 (79)  | 234 (21)  |      | 785 (69)  | 207 (18) | 100 (9)  | 49 (4)    | 0 (0)   |       |
| April                                                           | 1944 (22)  | 1676 (86) | 268 (14)  |      | 1002 (52) | 316 (16) | 198 (10) | 414 (21)  | 14 (1)  |       |
| May                                                             | 2558 (28)  | 2229 (87) | 329 (13)  |      | 1217 (48) | 235 (9)  | 192 (8)  | 838 (33)  | 76 (3)  |       |
| June                                                            | 2173 (24)  | 1837 (85) | 336 (15)  |      | 1013 (47) | 106 (5)  | 52 (2)   | 923 (42)  | 79 (4)  |       |
| Site-regions                                                    | 1124 (12)  | 921 (82)  | 203 (18)  | 0.24 | 543 (48)  | 43 (4)   | 15 (1)   | 476 (42)  | 47 (4)  | 0.16  |
| Site-region 1                                                   | 605 (7)    | 522 (86)  | 83 (14)   |      | 278 (46)  | 55 (9)   | 35 (6)   | 225 (37)  | 12 (2)  |       |
| Site-region 2                                                   | 356 (4)    | 278 (78)  | 78 (22)   |      | 180 (51)  | 35 (10)  | 22 (6)   | 116 (33)  | 3 (1)   |       |
| Site-region 3                                                   | 3266 (36)  | 2864 (88) | 402 (12)  |      | 1542 (47) | 351 (11) | 219 (7)  | 1073 (33) | 81 (2)  |       |
| Site-region 4                                                   | 1418 (16)  | 1166 (82) | 252 (18)  |      | 721 (51)  | 129 (9)  | 80 (6)   | 472 (33)  | 16 (1)  |       |
| Site-region 5                                                   | 310 (3)    | 262 (85)  | 48 (15)   |      | 165 (53)  | 31 (10)  | 24 (8)   | 82 (26)   | 8 (3)   |       |
| Site-region 6                                                   | 1146 (13)  | 983 (86)  | 163 (14)  |      | 623 (54)  | 111 (10) | 72 (6)   | 307 (27)  | 33 (3)  |       |
| Site-region 7                                                   | 283 (3)    | 241 (85)  | 42 (15)   |      | 159 (56)  | 27 (10)  | 15 (5)   | 77 (27)   | 5 (2)   |       |
| Site-region 8                                                   | 1609 (18)  | 1284 (80) | 325 (20)  |      | 944 (59)  | 169 (11) | 90 (6)   | 348 (22)  | 58 (4)  |       |
| Age groups                                                      |            |           |           | 0.30 |           |          |          |           |         | 0.41  |
| 50-64 years                                                     | 3070 (34)  | 2468 (80) | 602 (20)  |      | 1919 (63) | 253 (8)  | 149 (5)  | 630 (21)  | 119 (4) |       |
| 65-74 years                                                     | 2654 (30)  | 2237 (84) | 417 (16)  |      | 1366 (51) | 280 (11) | 156 (6)  | 796 (30)  | 56 (2)  |       |
| 75-84 years                                                     | 2213 (25)  | 1931 (87) | 282 (13)  |      | 924 (42)  | 263 (12) | 159 (7)  | 840 (38)  | 27 (1)  |       |
| ≥85 years                                                       | 1056 (12)  | 964 (91)  | 92 (9)    |      | 403 (38)  | 112 (11) | 93 (9)   | 434 (41)  | 14 (1)  |       |
| Race (regardless of ethnicity)                                  |            |           |           | 0.12 |           |          |          |           |         | 0.18  |
| White                                                           | 8227 (91)  | 6990 (85) | 1237 (15) |      | 4132 (50) | 833 (10) | 521 (6)  | 2548 (31) | 193 (2) |       |
| Black                                                           | 75 (1)     | 60 (80)   | 15 (20)   |      | 54 (72)   | 3 (4)    | 2 (3)    | 12 (16)   | 4 (5)   |       |
| Other <sup>6</sup>                                              | 366 (4)    | 300 (82)  | 66 (18)   |      | 216 (59)  | 45 (12)  | 20 (5)   | 78 (21)   | 7 (2)   |       |
| Unknown                                                         | 325 (4)    | 250 (77)  | 75 (23)   |      | 210 (65)  | 27 (8)   | 14 (4)   | 62 (19)   | 12 (4)  |       |
| Ethnicity (regardless of race)                                  |            |           |           | 0.29 |           |          |          |           |         | 0.19  |

|                                                                |           |           |           |            |          |          |           |           |
|----------------------------------------------------------------|-----------|-----------|-----------|------------|----------|----------|-----------|-----------|
| Hispanic                                                       | 788 (9)   | 569 (72)  | 219 (28)  | 502 (64)   | 71 (9)   | 39 (5)   | 160 (20)  | 16 (2)    |
| Non-Hispanic                                                   | 7921 (88) | 6802 (86) | 1119 (14) | 3935 (50)  | 814 (10) | 505 (6)  | 2478 (31) | 189 (2)   |
| Unknown                                                        | 284 (3)   | 229 (81)  | 55 (19)   | 175 (62)   | 23 (8)   | 13 (5)   | 62 (22)   | 11 (4)    |
| Underlying respiratory condition at discharge                  |           |           |           |            | -0.14    |          |           | 0.08      |
| Chronic respiratory condition <sup>7</sup>                     | 3998 (44) | 3462 (87) | 536 (13)  | 1956 (49)  | 410 (10) | 255 (6)  | 1271 (32) | 106 (3)   |
| None                                                           | 4995 (56) | 4138 (83) | 857 (17)  | 2656 (53)  | 498 (10) | 302 (6)  | 1429 (29) | 110 (2)   |
| Underlying non-respiratory condition at discharge              |           |           |           |            | -0.20    |          |           | 0.12      |
| Chronic non-respiratory condition <sup>8</sup>                 | 6673 (74) | 5743 (86) | 930 (14)  | 3306 (50)  | 665 (10) | 425 (6)  | 2124 (32) | 153 (2)   |
| None                                                           | 2320 (26) | 1857 (80) | 463 (20)  | 1306 (56)  | 243 (10) | 132 (6)  | 576 (25)  | 63 (3)    |
| COVID-19-like illness (CLI) ICD discharge codes                |           |           |           |            | 0.89     |          |           | -0.12     |
| ≥1 CLI clinical diagnosis code <sup>9</sup>                    | 5534 (62) | 4256 (77) | 1278 (23) | 2969 (54)  | 521 (9)  | 319 (6)  | 1588 (29) | 137 (2)   |
| No clinical diagnosis but ≥1 CLI sign or symptom <sup>10</sup> | 3459 (38) | 3344 (97) | 115 (3)   | 1643 (47)  | 387 (11) | 238 (7)  | 1112 (32) | 79 (2)    |
| CLI diagnosis and placement among discharge codes              |           |           |           |            | 0.84     |          |           | -0.18     |
| CLI is first or primary diagnosis                              | 5143 (57) | 3927 (76) | 1216 (24) | 2835 (55)  | 499 (10) | 289 (6)  | 1385 (27) | 135 (3)   |
| CLI is not first or primary diagnosis                          | 3850 (43) | 3673 (95) | 177 (5)   | 1777 (46)  | 409 (11) | 268 (7)  | 1315 (34) | 81 (2)    |
| COVID-19 Vaccinations                                          |           |           |           |            | 0.96     |          |           |           |
| Unvaccinated                                                   | 4612 (51) | 3419 (74) | 1193 (26) | 4612 (100) | 0 (0)    | 0 (0)    | 0 (0)     | 0 (0)     |
| BNT162b2 (Pfizer-BioNTech)                                     | 2302 (26) | 2186 (95) | 116 (5)   | 0 (0)      | 422 (18) | 307 (13) | 1573 (68) | 0 (0)     |
| mRNA-1273 (Moderna)                                            | 1863 (21) | 1792 (96) | 71 (4)    | 0 (0)      | 486 (26) | 250 (13) | 1127 (60) | 0 (0)     |
| Ad26.COV2.S (Johnson & Johnson)                                | 216 (2)   | 203 (94)  | 13 (6)    | 0 (0)      | 0 (0)    | 0 (0)    | 0 (0)     | 216 (100) |

Note: All patients with indeterminate immunization status (receipt of dose-1 of mRNA vaccine 1-13 days prior to index test date) were excluded from table.

Abbreviations: Standard Mean Difference (SMD), COVID-like Illness (CLI), International Classification of Disease (ICD), Intensive Care Unit (ICU), Emergency Department (ED), Urgent Care (UC)

<sup>1</sup>Partially vaccinated with 1 dose: patients received dose-1 of mRNA vaccine ≥ 14 days prior to the index text date, had not received dose-2 by the index test date.

<sup>2</sup>Partially vaccinated with 2 doses: patients received dose-1 and dose-2 of mRNA vaccine, dose-2 receipt date 1-13 days prior to index date.

<sup>3</sup>Fully vaccinated: patients received single dose of J&J vaccine, dose-1 and dose-2 of mRNA vaccine, dose-2 of mRNA vaccine ≥ 14 days prior to the index text date.

<sup>4</sup>Standard Mean Difference (SMD) calculation compares unvaccinated to any receipt of vaccine (partial dose-1, partial dose-2 and full vaccination).

<sup>5</sup>Index date for each medical encounter was defined as the date of respiratory specimen collection associated with the most recent positive or negative SARS-CoV-2 test result prior to the medical encounter or the date of the medical encounter if testing only occurred after the admission or encounter date.

<sup>6</sup>Other race include Asian, Hawaiian or Other Pacific islander, American Indian or Alaskan Native, Other not-listed and multi-race.

<sup>7</sup>Underlying chronic respiratory conditions include asthma, chronic obstructive pulmonary disease (COPD), other lung disease.

<sup>8</sup>Underlying chronic non-respiratory conditions include heart failure, ischemic heart disease, hypertension, other heart disease, stroke, other cerebrovascular disease, diabetes (type 1, 2 and due to other specified conditions), other metabolic disease, clinical obesity, clinically underweight, renal disease, liver disease, blood disorder, other immunosuppressive conditions, organ transplant recipient, cancer, dementia, neurological/musculoskeletal disorder or Down's syndrome.

<sup>9</sup>CLI clinical discharge diagnosis codes include: COVID-19 U codes, COVID-19 pneumonia, influenza pneumonia, other viral pneumonia, pneumonia and influenza (bacterial and other) influenza diagnoses, acute respiratory distress syndrome (ARDS), COPD exacerbation, asthma exacerbation, respiratory failure, other acute lower respiratory tract infection, sinusitis, acute upper respiratory tract infection.

<sup>10</sup>CLI signs and symptoms include: hemoptysis, cough, dyspnea unspecified, chest pain or breathing/painful respiration, asphyxia, hypoxemia, pleurisy, respiratory arrest, abnormal sputum, other specified symptoms and signs involving the circulatory and respiratory systems, fever, chills (without fever), diarrhea, disturbance of taste or smell, headache, myalgia, sepsis, other malaise, other fatigue, shock (unspecified), debility (unspecified), altered level of consciousness/mental state, weakness, nausea and vomiting, rash or other nonspecific skin eruption, abdominal pain

**Table S9. Characteristics of adults with medically attended COVID-19-like illness and the percent with laboratory-confirmed SARS-CoV-2 infection and percent unvaccinated, partially vaccinated with messenger RNA (mRNA) vaccines, or fully vaccinated with mRNA or Ad26.COVID.S vaccines, KAISER PERMANENTE NORTHERN CALIFORNIA**

|                                                  | Total Medical Events |            | SARS-CoV-2 Negatives |           | SARS-CoV-2 Positives |           | SMD  | Unvaccinated |           | Partially mRNA Vaccinated (1 dose) <sup>1</sup> |           | Partially mRNA Vaccinated (2 doses) <sup>2</sup> |           | Fully mRNA Vaccinated <sup>3</sup> |           | Fully Ad26.COVID.S Vaccinated <sup>3</sup> |           | SMD <sup>4</sup> |      |
|--------------------------------------------------|----------------------|------------|----------------------|-----------|----------------------|-----------|------|--------------|-----------|-------------------------------------------------|-----------|--------------------------------------------------|-----------|------------------------------------|-----------|--------------------------------------------|-----------|------------------|------|
|                                                  | N                    | ( Col. % ) | N                    | ( Row % ) | N                    | ( Row % ) |      | N            | ( Row % ) | N                                               | ( Row % ) | N                                                | ( Row % ) | N                                  | ( Row % ) | N                                          | ( Row % ) |                  |      |
| <b>A. Hospitalizations</b>                       |                      |            |                      |           |                      |           |      |              |           |                                                 |           |                                                  |           |                                    |           |                                            |           |                  |      |
| All hospitalizations                             | 13824                | ( 100 )    | 13159                | ( 95 )    | 665                  | ( 5 )     |      | 3559         | ( 26 )    | 1021                                            | ( 7 )     | 980                                              | ( 7 )     | 7874                               | ( 57 )    | 390                                        | ( 3 )     |                  |      |
| Month of hospitalization index date <sup>5</sup> |                      |            |                      |           |                      |           | 0.14 |              |           |                                                 |           |                                                  |           |                                    |           |                                            |           |                  | 0.23 |
| March                                            | 2471                 | ( 18 )     | 2352                 | ( 95 )    | 119                  | ( 5 )     |      | 826          | ( 33 )    | 375                                             | ( 15 )    | 469                                              | ( 19 )    | 797                                | ( 32 )    | 4                                          | ( 0 )     |                  |      |
| April                                            | 4460                 | ( 32 )     | 4218                 | ( 95 )    | 242                  | ( 5 )     |      | 1218         | ( 27 )    | 320                                             | ( 7 )     | 348                                              | ( 8 )     | 2448                               | ( 55 )    | 126                                        | ( 3 )     |                  |      |
| May                                              | 4960                 | ( 36 )     | 4724                 | ( 95 )    | 236                  | ( 5 )     |      | 1144         | ( 23 )    | 260                                             | ( 5 )     | 143                                              | ( 3 )     | 3241                               | ( 65 )    | 172                                        | ( 3 )     |                  |      |
| June                                             | 1933                 | ( 14 )     | 1865                 | ( 96 )    | 68                   | ( 4 )     |      | 371          | ( 19 )    | 66                                              | ( 3 )     | 20                                               | ( 1 )     | 1388                               | ( 72 )    | 88                                         | ( 5 )     |                  |      |
| Site-regions                                     |                      |            |                      |           |                      |           | 0.47 |              |           |                                                 |           |                                                  |           |                                    |           |                                            |           |                  | 0.28 |
| Site-region 1                                    | 705                  | ( 5 )      | 651                  | ( 92 )    | 54                   | ( 8 )     |      | 223          | ( 32 )    | 68                                              | ( 10 )    | 49                                               | ( 7 )     | 347                                | ( 49 )    | 18                                         | ( 3 )     |                  |      |
| Site-region 2                                    | 510                  | ( 4 )      | 453                  | ( 89 )    | 57                   | ( 11 )    |      | 211          | ( 41 )    | 41                                              | ( 8 )     | 25                                               | ( 5 )     | 225                                | ( 44 )    | 8                                          | ( 2 )     |                  |      |
| Site-region 3                                    | 3200                 | ( 23 )     | 2981                 | ( 93 )    | 219                  | ( 7 )     |      | 997          | ( 31 )    | 255                                             | ( 8 )     | 204                                              | ( 6 )     | 1683                               | ( 53 )    | 61                                         | ( 2 )     |                  |      |
| Site-region 4                                    | 5660                 | ( 41 )     | 5478                 | ( 97 )    | 182                  | ( 3 )     |      | 1262         | ( 22 )    | 370                                             | ( 7 )     | 432                                              | ( 8 )     | 3410                               | ( 60 )    | 186                                        | ( 3 )     |                  |      |
| Site-region 5                                    | 1660                 | ( 12 )     | 1605                 | ( 97 )    | 55                   | ( 3 )     |      | 338          | ( 20 )    | 117                                             | ( 7 )     | 118                                              | ( 7 )     | 1023                               | ( 62 )    | 64                                         | ( 4 )     |                  |      |
| Site-region 6                                    | 676                  | ( 5 )      | 663                  | ( 98 )    | 13                   | ( 2 )     |      | 123          | ( 18 )    | 57                                              | ( 8 )     | 47                                               | ( 7 )     | 428                                | ( 63 )    | 21                                         | ( 3 )     |                  |      |
| Site-region 7                                    | 267                  | ( 2 )      | 243                  | ( 91 )    | 24                   | ( 9 )     |      | 91           | ( 34 )    | 19                                              | ( 7 )     | 20                                               | ( 7 )     | 132                                | ( 49 )    | 5                                          | ( 2 )     |                  |      |
| Site-region 8                                    | 1146                 | ( 8 )      | 1085                 | ( 95 )    | 61                   | ( 5 )     |      | 314          | ( 27 )    | 94                                              | ( 8 )     | 85                                               | ( 7 )     | 626                                | ( 55 )    | 27                                         | ( 2 )     |                  |      |
| Age groups                                       |                      |            |                      |           |                      |           | 0.45 |              |           |                                                 |           |                                                  |           |                                    |           |                                            |           |                  | 0.30 |
| 50-64 years                                      | 2347                 | ( 17 )     | 2118                 | ( 90 )    | 229                  | ( 10 )    |      | 871          | ( 37 )    | 183                                             | ( 8 )     | 202                                              | ( 9 )     | 938                                | ( 40 )    | 153                                        | ( 7 )     |                  |      |
| 65-74 years                                      | 4288                 | ( 31 )     | 4096                 | ( 96 )    | 192                  | ( 4 )     |      | 1178         | ( 27 )    | 377                                             | ( 9 )     | 336                                              | ( 8 )     | 2302                               | ( 54 )    | 95                                         | ( 2 )     |                  |      |
| 75-84 years                                      | 4330                 | ( 31 )     | 4181                 | ( 97 )    | 149                  | ( 3 )     |      | 907          | ( 21 )    | 280                                             | ( 6 )     | 288                                              | ( 7 )     | 2768                               | ( 64 )    | 87                                         | ( 2 )     |                  |      |
| ≥85 years                                        | 2859                 | ( 21 )     | 2764                 | ( 97 )    | 95                   | ( 3 )     |      | 603          | ( 21 )    | 181                                             | ( 6 )     | 154                                              | ( 5 )     | 1866                               | ( 65 )    | 55                                         | ( 2 )     |                  |      |
| Race (regardless of ethnicity)                   |                      |            |                      |           |                      |           | 0.34 |              |           |                                                 |           |                                                  |           |                                    |           |                                            |           |                  | 0.20 |
| White                                            | 8712                 | ( 63 )     | 8374                 | ( 96 )    | 338                  | ( 4 )     |      | 2083         | ( 24 )    | 658                                             | ( 8 )     | 586                                              | ( 7 )     | 5160                               | ( 59 )    | 225                                        | ( 3 )     |                  |      |
| Black                                            | 1355                 | ( 10 )     | 1260                 | ( 93 )    | 95                   | ( 7 )     |      | 493          | ( 36 )    | 119                                             | ( 9 )     | 113                                              | ( 8 )     | 581                                | ( 43 )    | 49                                         | ( 4 )     |                  |      |
| Other <sup>6</sup>                               | 2225                 | ( 16 )     | 2128                 | ( 96 )    | 97                   | ( 4 )     |      | 518          | ( 23 )    | 134                                             | ( 6 )     | 160                                              | ( 7 )     | 1342                               | ( 60 )    | 71                                         | ( 3 )     |                  |      |
| Unknown                                          | 1532                 | ( 11 )     | 1397                 | ( 91 )    | 135                  | ( 9 )     |      | 465          | ( 30 )    | 110                                             | ( 7 )     | 121                                              | ( 8 )     | 791                                | ( 52 )    | 45                                         | ( 3 )     |                  |      |
| Ethnicity (regardless of race)                   |                      |            |                      |           |                      |           | 0.39 |              |           |                                                 |           |                                                  |           |                                    |           |                                            |           |                  | 0.25 |
| Hispanic                                         | 2070                 | ( 15 )     | 1914                 | ( 92 )    | 156                  | ( 8 )     |      | 616          | ( 30 )    | 141                                             | ( 7 )     | 159                                              | ( 8 )     | 1088                               | ( 53 )    | 66                                         | ( 3 )     |                  |      |
| Non-Hispanic                                     | 8532                 | ( 62 )     | 8243                 | ( 97 )    | 289                  | ( 3 )     |      | 1881         | ( 22 )    | 616                                             | ( 7 )     | 584                                              | ( 7 )     | 5253                               | ( 62 )    | 198                                        | ( 2 )     |                  |      |
| Unknown                                          | 3222                 | ( 23 )     | 3002                 | ( 93 )    | 220                  | ( 7 )     |      | 1062         | ( 33 )    | 264                                             | ( 8 )     | 237                                              | ( 7 )     | 1533                               | ( 48 )    | 126                                        | ( 4 )     |                  |      |



|                                                                |       |        |       |         |     |        |      |         |      |        |      |        |      |        |     |         |
|----------------------------------------------------------------|-------|--------|-------|---------|-----|--------|------|---------|------|--------|------|--------|------|--------|-----|---------|
| Underlying respiratory condition at discharge                  |       |        |       | -0.10   |     |        |      |         |      |        | 0.06 |        |      |        |     |         |
| Chronic respiratory condition <sup>7</sup>                     | 10485 | ( 76 ) | 10007 | ( 95 )  | 478 | ( 5 )  | 2632 | ( 25 )  | 767  | ( 7 )  | 756  | ( 7 )  | 6033 | ( 58 ) | 297 | ( 3 )   |
| None                                                           | 3339  | ( 24 ) | 3152  | ( 94 )  | 187 | ( 6 )  | 927  | ( 28 )  | 254  | ( 8 )  | 224  | ( 7 )  | 1841 | ( 55 ) | 93  | ( 3 )   |
| Underlying non-respiratory condition at discharge              |       |        |       | -0.19   |     |        |      |         |      |        |      |        |      |        |     | 0.07    |
| Chronic non-respiratory condition <sup>8</sup>                 | 13669 | ( 99 ) | 13030 | ( 95 )  | 639 | ( 5 )  | 3499 | ( 26 )  | 1006 | ( 7 )  | 970  | ( 7 )  | 7808 | ( 57 ) | 386 | ( 3 )   |
| None                                                           | 155   | ( 1 )  | 129   | ( 83 )  | 26  | ( 17 ) | 60   | ( 39 )  | 15   | ( 10 ) | 10   | ( 6 )  | 66   | ( 43 ) | 4   | ( 3 )   |
| COVID-19-like illness (CLI) ICD discharge codes                |       |        |       | 0.66    |     |        |      |         |      |        |      |        |      |        |     | 0.00    |
| ≥1 CLI clinical diagnosis code <sup>9</sup>                    | 10838 | ( 78 ) | 10187 | ( 94 )  | 651 | ( 6 )  | 2792 | ( 26 )  | 804  | ( 7 )  | 784  | ( 7 )  | 6159 | ( 57 ) | 299 | ( 3 )   |
| No clinical diagnosis but ≥1 CLI sign or symptom <sup>10</sup> | 2986  | ( 22 ) | 2972  | ( 100 ) | 14  | ( 0 )  | 767  | ( 26 )  | 217  | ( 7 )  | 196  | ( 7 )  | 1715 | ( 57 ) | 91  | ( 3 )   |
| CLI diagnosis and placement among discharge codes              |       |        |       | 0.17    |     |        |      |         |      |        |      |        |      |        |     | -0.06   |
| CLI is first or primary diagnosis                              | 255   | ( 2 )  | 224   | ( 88 )  | 31  | ( 12 ) | 89   | ( 35 )  | 20   | ( 8 )  | 18   | ( 7 )  | 118  | ( 46 ) | 10  | ( 4 )   |
| CLI is not first or primary diagnosis                          | 13569 | ( 98 ) | 12935 | ( 95 )  | 634 | ( 5 )  | 3470 | ( 26 )  | 1001 | ( 7 )  | 962  | ( 7 )  | 7756 | ( 57 ) | 380 | ( 3 )   |
| Intensive care unit (ICU) admissions                           |       |        |       | -0.02   |     |        |      |         |      |        |      |        |      |        |     | -0.05   |
| Admitted to ICU                                                | 2380  | ( 17 ) | 2270  | ( 95 )  | 110 | ( 5 )  | 664  | ( 28 )  | 200  | ( 8 )  | 159  | ( 7 )  | 1279 | ( 54 ) | 78  | ( 3 )   |
| Not in ICU during hospitalization                              | 11444 | ( 83 ) | 10889 | ( 95 )  | 555 | ( 5 )  | 2895 | ( 25 )  | 821  | ( 7 )  | 821  | ( 7 )  | 6595 | ( 58 ) | 312 | ( 3 )   |
| COVID-19 Vaccinations                                          |       |        |       | 1.16    |     |        |      |         |      |        |      |        |      |        |     | -       |
| Unvaccinated                                                   | 3559  | ( 26 ) | 3071  | ( 86 )  | 488 | ( 14 ) | 3559 | ( 100 ) |      |        |      |        |      |        |     |         |
| BNT162b2 (Pfizer-BioNTech)                                     | 5668  | ( 41 ) | 5564  | ( 98 )  | 104 | ( 2 )  |      |         | 473  | ( 8 )  | 517  | ( 9 )  | 4678 | ( 83 ) |     |         |
| mRNA-1273 (Moderna)                                            | 4207  | ( 30 ) | 4144  | ( 99 )  | 63  | ( 1 )  |      |         | 548  | ( 13 ) | 463  | ( 11 ) | 3196 | ( 76 ) |     |         |
| Ad26.COV2.S (Johnson & Johnson)                                | 390   | ( 3 )  | 380   | ( 97 )  | 10  | ( 3 )  |      |         |      |        |      |        |      |        | 390 | ( 100 ) |

Abbreviations: Standard Mean Difference (SMD), COVID-like Illness (CLI), International Classification of Disease (ICD), Intensive Care Unit (ICU), Emergency Department (ED), Urgent Care (UC)

<sup>1</sup>Partially vaccinated with 1 dose: patients received dose-1 of mRNA vaccine ≥ 14 days prior to the index text date, had not received dose-2 by the index test date

<sup>2</sup>Partially vaccinated with 2 doses: patients received dose-1 and dose-2 of mRNA vaccine, dose-2 receipt date 1-13 days prior to index date.

<sup>3</sup>Fully vaccinated: patients received single dose of J&J vaccine, dose-1 and dose-2 of mRNA vaccine, dose-2 of mRNA vaccine ≥ 14 days prior to the index text date.

<sup>4</sup>Standard Mean Difference (SMD) calculation compares unvaccinated to any receipt of vaccine (partial dose-1, partial dose-2 and full vaccination).

<sup>5</sup>Index date for each medical encounter was defined as the date of respiratory specimen collection associated with the most recent positive or negative SARS-CoV-2 test result prior to the medical encounter or the date of the medical encounter if testing only occurred after the admission or encounter date.

<sup>6</sup>Other race include Asian, Hawaiian or Other Pacific islander, American Indian or Alaskan Native, Other not-listed and multi-race.

<sup>7</sup>Underlying chronic respiratory conditions include asthma, chronic obstructive pulmonary disease (COPD), other lung disease.

<sup>8</sup>Underlying chronic non-respiratory conditions include: heart failure, ischemic heart disease, hypertension, other heart disease, stroke, other cerebrovascular disease, diabetes (type 1, 2 and due to other specified conditions), other metabolic disease, clinical obesity, clinically underweight, renal disease, liver disease, blood disorder, other immunosuppressive conditions, organ transplant recipient, cancer, dementia, neurological/musculoskeletal disorder or Down's syndrome.

<sup>9</sup>CLI clinical discharge diagnosis codes include: COVID-19 U codes, COVID-19 pneumonia, influenza pneumonia, other viral pneumonia, pneumonia and influenza (bacterial and other) influenza diagnoses, acute respiratory distress syndrome (ARDS), COPD exacerbation, asthma exacerbation, respiratory failure, other acute lower respiratory tract infection, sinusitis, acute upper respiratory tract infection.

<sup>10</sup>CLI signs and symptoms include: hemoptysis, cough, dyspnea unspecified, chest pain or breathing/painful respiration, asphyxia, hypoxemia, pleurisy, respiratory arrest, abnormal sputum, other specified symptoms and signs involving the circulatory and respiratory systems, fever, chills (without fever), diarrhea, disturbance of taste or smell, headache, myalgia, sepsis, other malaise, other fatigue, shock (unspecified), debility (unspecified), altered level of consciousness/mental state, weakness, nausea and vomiting, rash or other nonspecific skin eruption, abdominal pain

**Table S10. Characteristics of adults with medically attended COVID-19-like illness and the percent with laboratory-confirmed SARS-CoV-2 infection and percent unvaccinated, partially vaccinated with messenger RNA (mRNA) vaccines, or fully vaccinated with mRNA or Ad26.COV2.S vaccines, REGENSTRIEF INSTITUTE**

|                                                  | Total Medical Events | SARS-CoV-2 Negatives | SARS-CoV-2 Positives | SMD  | Unvaccinated | Partially mRNA Vaccinated (1 dose) <sup>1</sup> | Partially mRNA Vaccinated (2 doses) <sup>2</sup> | Fully mRNA Vaccinated <sup>3</sup> | Fully Ad26.COV2.S Vaccinated <sup>3</sup> | SMD <sup>4</sup> |
|--------------------------------------------------|----------------------|----------------------|----------------------|------|--------------|-------------------------------------------------|--------------------------------------------------|------------------------------------|-------------------------------------------|------------------|
|                                                  | N (Col. %)           | N (Row %)            | N (Row %)            |      | N (Row %)    | N (Row %)                                       | N (Row %)                                        | N (Row %)                          | N (Row %)                                 |                  |
| <b>A. Hospitalizations</b>                       |                      |                      |                      |      |              |                                                 |                                                  |                                    |                                           |                  |
| All hospitalizations                             | 12437 (100)          | 10776 (87)           | 1661 (13)            |      | 7593 (61)    | 925 (7)                                         | 674 (5)                                          | 3114 (25)                          | 131 (1)                                   |                  |
| Month of hospitalization index date <sup>5</sup> |                      |                      |                      | 0.3  |              |                                                 |                                                  |                                    |                                           | 0.36             |
| January                                          | 536 (4)              | 387 (72)             | 149 (28)             |      | 489 (91)     | 35 (7)                                          | 12 (2)                                           | 0 (0)                              | 0 (0)                                     |                  |
| February                                         | 1828 (15)            | 1594 (87)            | 234 (13)             |      | 1318 (72)    | 268 (15)                                        | 180 (10)                                         | 62 (3)                             | 0 (0)                                     |                  |
| March                                            | 2863 (23)            | 2589 (90)            | 274 (10)             |      | 1779 (62)    | 249 (9)                                         | 250 (9)                                          | 581 (20)                           | 4 (0)                                     |                  |
| April                                            | 3257 (26)            | 2762 (85)            | 495 (15)             |      | 1908 (59)    | 217 (7)                                         | 143 (4)                                          | 951 (29)                           | 38 (1)                                    |                  |
| May                                              | 3105 (25)            | 2652 (85)            | 453 (15)             |      | 1672 (54)    | 137 (4)                                         | 81 (3)                                           | 1151 (37)                          | 64 (2)                                    |                  |
| June                                             | 848 (7)              | 792 (93)             | 56 (7)               |      | 427 (50)     | 19 (2)                                          | 8 (1)                                            | 369 (44)                           | 25 (3)                                    |                  |
| Site-regions                                     |                      |                      |                      | 0.31 |              |                                                 |                                                  |                                    |                                           | 0.28             |
| Site-region 1                                    | 2797 (22)            | 2386 (85)            | 411 (15)             |      | 1966 (70)    | 173 (6)                                         | 114 (4)                                          | 514 (18)                           | 30 (1)                                    |                  |
| Site-region 2                                    | 565 (5)              | 458 (81)             | 107 (19)             |      | 317 (56)     | 44 (8)                                          | 16 (3)                                           | 180 (32)                           | 8 (1)                                     |                  |
| Site-region 3                                    | 170 (1)              | 122 (72)             | 48 (28)              |      | 116 (68)     | 9 (5)                                           | 8 (5)                                            | 37 (22)                            | 0 (0)                                     |                  |
| Site-region 4                                    | 934 (8)              | 779 (83)             | 155 (17)             |      | 577 (62)     | 63 (7)                                          | 63 (7)                                           | 222 (24)                           | 9 (1)                                     |                  |
| Site-region 5                                    | 3754 (30)            | 3334 (89)            | 420 (11)             |      | 2181 (58)    | 302 (8)                                         | 223 (6)                                          | 1002 (27)                          | 46 (1)                                    |                  |
| Site-region 6                                    | 1151 (9)             | 991 (86)             | 160 (14)             |      | 681 (59)     | 104 (9)                                         | 65 (6)                                           | 293 (25)                           | 8 (1)                                     |                  |
| Site-region 7                                    | 114 (1)              | 108 (95)             | 6 (5)                |      | 64 (56)      | 8 (7)                                           | 7 (6)                                            | 33 (29)                            | 2 (2)                                     |                  |
| Site-region 8                                    | 856 (7)              | 735 (86)             | 121 (14)             |      | 513 (60)     | 65 (8)                                          | 51 (6)                                           | 224 (26)                           | 3 (0)                                     |                  |
| Site-region 9                                    | 778 (6)              | 711 (91)             | 67 (9)               |      | 371 (48)     | 65 (8)                                          | 50 (6)                                           | 279 (36)                           | 13 (2)                                    |                  |
| Site-region 10                                   | 271 (2)              | 256 (94)             | 15 (6)               |      | 142 (52)     | 19 (7)                                          | 13 (5)                                           | 95 (35)                            | 2 (1)                                     |                  |
| Site-region missing                              | 1047 (8)             | 896 (86)             | 151 (14)             |      | 665 (64)     | 73 (7)                                          | 64 (6)                                           | 235 (22)                           | 10 (1)                                    |                  |
| Age groups                                       |                      |                      |                      | 0.25 |              |                                                 |                                                  |                                    |                                           | 0.39             |
| 50-64 years                                      | 3158 (25)            | 2583 (82)            | 575 (18)             |      | 2323 (74)    | 208 (7)                                         | 127 (4)                                          | 431 (14)                           | 69 (2)                                    |                  |
| 65-74 years                                      | 3988 (32)            | 3488 (87)            | 500 (13)             |      | 2483 (62)    | 293 (7)                                         | 202 (5)                                          | 973 (24)                           | 37 (1)                                    |                  |
| 75-84 years                                      | 3382 (27)            | 2997 (89)            | 385 (11)             |      | 1842 (54)    | 261 (8)                                         | 204 (6)                                          | 1057 (31)                          | 18 (1)                                    |                  |
| ≥85 years                                        | 1909 (15)            | 1708 (89)            | 201 (11)             |      | 945 (50)     | 163 (9)                                         | 141 (7)                                          | 653 (34)                           | 7 (0)                                     |                  |
| Race (regardless of ethnicity)                   |                      |                      |                      | 0.11 |              |                                                 |                                                  |                                    |                                           | 0.22             |
| White                                            | 8916 (72)            | 7797 (87)            | 1119 (13)            |      | 5360 (60)    | 693 (8)                                         | 513 (6)                                          | 2268 (25)                          | 82 (1)                                    |                  |

|                                                                |            |           |           |       |            |          |          |           |           |       |
|----------------------------------------------------------------|------------|-----------|-----------|-------|------------|----------|----------|-----------|-----------|-------|
| Black                                                          | 1385 (11)  | 1174 (85) | 211 (15)  |       | 1025 (74)  | 77 (6)   | 55 (4)   | 206 (15)  | 22 (2)    |       |
| Other <sup>6</sup>                                             | 84 (1)     | 65 (77)   | 19 (23)   |       | 49 (58)    | 3 (4)    | 9 (11)   | 23 (27)   | 0 (0)     |       |
| Unknown                                                        | 2052 (16)  | 1740 (85) | 312 (15)  |       | 1159 (56)  | 152 (7)  | 97 (5)   | 617 (30)  | 27 (1)    |       |
| Ethnicity (regardless of race)                                 |            |           |           | 0.13  |            |          |          |           |           | 0.15  |
| Hispanic                                                       | 207 (2)    | 166 (80)  | 41 (20)   |       | 159 (77)   | 9 (4)    | 3 (1)    | 34 (16)   | 2 (1)     |       |
| Non-Hispanic                                                   | 10263 (83) | 8960 (87) | 1303 (13) |       | 6365 (62)  | 763 (7)  | 577 (6)  | 2455 (24) | 103 (1)   |       |
| Unknown                                                        | 1967 (16)  | 1650 (84) | 317 (16)  |       | 1069 (54)  | 153 (8)  | 94 (5)   | 625 (32)  | 26 (1)    |       |
| Underlying respiratory condition at discharge                  |            |           |           | -0.09 |            |          |          |           |           | 0.00  |
| Chronic respiratory condition <sup>7</sup>                     | 6790 (55)  | 5951 (88) | 839 (12)  |       | 4141 (61)  | 517 (8)  | 360 (5)  | 1707 (25) | 65 (1)    |       |
| None                                                           | 5647 (45)  | 4825 (85) | 822 (15)  |       | 3452 (61)  | 408 (7)  | 314 (6)  | 1407 (25) | 66 (1)    |       |
| Underlying non-respiratory condition at discharge              |            |           |           | -0.25 |            |          |          |           |           | 0.07  |
| Chronic non-respiratory condition <sup>8</sup>                 | 9282 (75)  | 8208 (88) | 1074 (12) |       | 5571 (60)  | 714 (8)  | 519 (6)  | 2369 (26) | 109 (1)   |       |
| None                                                           | 3155 (25)  | 2568 (81) | 587 (19)  |       | 2022 (64)  | 211 (7)  | 155 (5)  | 745 (24)  | 22 (1)    |       |
| COVID-19-like illness (CLI) ICD discharge codes                |            |           |           | 0.88  |            |          |          |           |           | -0.12 |
| ≥1 CLI clinical diagnosis code <sup>9</sup>                    | 8550 (69)  | 6950 (81) | 1600 (19) |       | 5383 (63)  | 620 (7)  | 432 (5)  | 2027 (24) | 88 (1)    |       |
| No clinical diagnosis but ≥1 CLI sign or symptom <sup>10</sup> | 3887 (31)  | 3826 (98) | 61 (2)    |       | 2210 (57)  | 305 (8)  | 242 (6)  | 1087 (28) | 43 (1)    |       |
| CLI diagnosis and placement among discharge codes              |            |           |           | 0.65  |            |          |          |           |           | -0.11 |
| CLI is first or primary diagnosis                              | 5495 (44)  | 4321 (79) | 1174 (21) |       | 3511 (64)  | 393 (7)  | 283 (5)  | 1250 (23) | 58 (1)    |       |
| CLI is not first or primary diagnosis                          | 6942 (56)  | 6455 (93) | 487 (7)   |       | 4082 (59)  | 532 (8)  | 391 (6)  | 1864 (27) | 73 (1)    |       |
| Intensive care unit (ICU) admissions                           |            |           |           | 0.05  |            |          |          |           |           | -0.08 |
| Admitted to ICU                                                | 2236 (18)  | 1911 (85) | 325 (15)  |       | 1457 (65)  | 149 (7)  | 104 (5)  | 509 (23)  | 17 (1)    |       |
| Not in ICU during hospitalization                              | 10201 (82) | 8865 (87) | 1336 (13) |       | 6136 (60)  | 776 (8)  | 570 (6)  | 2605 (26) | 114 (1)   |       |
| COVID-19 Vaccinations                                          |            |           |           | 0.71  |            |          |          |           |           |       |
| Unvaccinated                                                   | 7593 (61)  | 6156 (81) | 1437 (19) |       | 7593 (100) | 0 (0)    | 0 (0)    | 0 (0)     | 0 (0)     |       |
| BNT162b2 (Pfizer-BioNTech)                                     | 2050 (16)  | 1949 (95) | 101 (5)   |       | 0 (0)      | 352 (17) | 320 (16) | 1378 (67) | 0 (0)     |       |
| mRNA-1273 (Moderna)                                            | 2663 (21)  | 2553 (96) | 110 (4)   |       | 0 (0)      | 573 (22) | 354 (13) | 1736 (65) | 0 (0)     |       |
| Ad26.COV2.S (Johnson & Johnson)                                | 131 (1)    | 118 (90)  | 13 (10)   |       | 0 (0)      | 0 (0)    | 0 (0)    | 0 (0)     | 131 (100) |       |

**B. Emergency Department (ED) and Urgent Care (UC) Visits**

|                                              |            |           |           |      |           |          |         |           |         |      |
|----------------------------------------------|------------|-----------|-----------|------|-----------|----------|---------|-----------|---------|------|
| All ED and UC Visits                         | 7847 (100) | 6394 (81) | 1453 (19) |      | 5100 (65) | 572 (7)  | 385 (5) | 1663 (21) | 127 (2) |      |
| By medical event setting                     |            |           |           |      |           |          |         |           |         |      |
| ED visits                                    | 7847 (100) | 6394 (81) | 1453 (19) |      | 5100 (65) | 572 (7)  | 385 (5) | 1663 (21) | 127 (2) |      |
| Month of ED/UC event index date <sup>5</sup> |            |           |           | 0.25 |           |          |         |           |         | 0.31 |
| January                                      | 281 (4)    | 192 (68)  | 89 (32)   |      | 265 (94)  | 14 (5)   | 1 (0)   | 1 (0)     | 0 (0)   |      |
| February                                     | 884 (11)   | 749 (85)  | 135 (15)  |      | 634 (72)  | 137 (15) | 82 (9)  | 31 (4)    | 0 (0)   |      |
| March                                        | 1682 (21)  | 1411 (84) | 271 (16)  |      | 1164 (69) | 145 (9)  | 126 (7) | 243 (14)  | 4 (0)   |      |
| April                                        | 2159 (28)  | 1676 (78) | 483 (22)  |      | 1361 (63) | 160 (7)  | 103 (5) | 494 (23)  | 41 (2)  |      |
| May                                          | 2082 (27)  | 1705 (82) | 377 (18)  |      | 1257 (60) | 92 (4)   | 62 (3)  | 613 (29)  | 58 (3)  |      |
| June                                         | 759 (10)   | 661 (87)  | 98 (13)   |      | 419 (55)  | 24 (3)   | 11 (1)  | 281 (37)  | 24 (3)  |      |
| Site-regions                                 |            |           |           | 0.38 |           |          |         |           |         | 0.18 |
| Site-region 1                                | 894 (11)   | 705 (79)  | 189 (21)  |      | 658 (74)  | 58 (6)   | 40 (4)  | 129 (14)  | 9 (1)   |      |
| Site-region 2                                | 518 (7)    | 420 (81)  | 98 (19)   |      | 316 (61)  | 23 (4)   | 17 (3)  | 148 (29)  | 14 (3)  |      |
| Site-region 3                                | 291 (4)    | 156 (54)  | 135 (46)  |      | 216 (74)  | 27 (9)   | 16 (5)  | 30 (10)   | 2 (1)   |      |
| Site-region 4                                | 884 (11)   | 695 (79)  | 189 (21)  |      | 574 (65)  | 65 (7)   | 47 (5)  | 184 (21)  | 14 (2)  |      |
| Site-region 5                                | 2339 (30)  | 1968 (84) | 371 (16)  |      | 1455 (62) | 180 (8)  | 136 (6) | 528 (23)  | 40 (2)  |      |
| Site-region 6                                | 639 (8)    | 530 (83)  | 109 (17)  |      | 445 (70)  | 49 (8)   | 30 (5)  | 107 (17)  | 8 (1)   |      |
| Site-region 7                                | 176 (2)    | 153 (87)  | 23 (13)   |      | 119 (68)  | 12 (7)   | 7 (4)   | 35 (20)   | 3 (2)   |      |
| Site-region 8                                | 711 (9)    | 581 (82)  | 130 (18)  |      | 477 (67)  | 45 (6)   | 27 (4)  | 151 (21)  | 11 (2)  |      |
| Site-region 9                                | 398 (5)    | 344 (86)  | 54 (14)   |      | 233 (59)  | 37 (9)   | 20 (5)  | 101 (25)  | 7 (2)   |      |
| Site-region 10                               | 191 (2)    | 179 (94)  | 12 (6)    |      | 112 (59)  | 14 (7)   | 13 (7)  | 52 (27)   | 0 (0)   |      |
| Site-region missing                          | 806 (10)   | 663 (82)  | 143 (18)  |      | 495 (61)  | 62 (8)   | 32 (4)  | 198 (25)  | 19 (2)  |      |
| Age groups                                   |            |           |           | 0.33 |           |          |         |           |         | 0.41 |
| 50-64 years                                  | 3323 (42)  | 2556 (77) | 767 (23)  |      | 2502 (75) | 211 (6)  | 112 (3) | 406 (12)  | 92 (3)  |      |
| 65-74 years                                  | 2264 (29)  | 1862 (82) | 402 (18)  |      | 1384 (61) | 179 (8)  | 131 (6) | 548 (24)  | 22 (1)  |      |
| 75-84 years                                  | 1591 (20)  | 1368 (86) | 223 (14)  |      | 871 (55)  | 133 (8)  | 99 (6)  | 479 (30)  | 9 (1)   |      |
| ≥85 years                                    | 669 (9)    | 608 (91)  | 61 (9)    |      | 343 (51)  | 49 (7)   | 43 (6)  | 230 (34)  | 4 (1)   |      |
| Race (regardless of ethnicity)               |            |           |           | 0.11 |           |          |         |           |         | 0.16 |
| White                                        | 5346 (68)  | 4417 (83) | 929 (17)  |      | 3447 (64) | 403 (8)  | 271 (5) | 1144 (21) | 81 (2)  |      |
| Black                                        | 612 (8)    | 474 (77)  | 138 (23)  |      | 470 (77)  | 36 (6)   | 21 (3)  | 76 (12)   | 9 (1)   |      |
| Other <sup>6</sup>                           | 56 (1)     | 37 (66)   | 19 (34)   |      | 38 (68)   | 3 (5)    | 5 (9)   | 10 (18)   | 0 (0)   |      |
| Unknown                                      | 1833 (23)  | 1466 (80) | 367 (20)  |      | 1145 (62) | 130 (7)  | 88 (5)  | 433 (24)  | 37 (2)  |      |
| Ethnicity (regardless of race)               |            |           |           | 0.14 |           |          |         |           |         | 0.11 |

|                                                                |           |           |           |       |            |          |          |           |           |       |
|----------------------------------------------------------------|-----------|-----------|-----------|-------|------------|----------|----------|-----------|-----------|-------|
| Hispanic                                                       | 133 (2)   | 92 (69)   | 41 (31)   |       | 108 (81)   | 5 (4)    | 1 (1)    | 14 (11)   | 5 (4)     |       |
| Non-Hispanic                                                   | 5884 (75) | 4825 (82) | 1059 (18) |       | 3855 (66)  | 446 (8)  | 300 (5)  | 1198 (20) | 85 (1)    |       |
| Unknown                                                        | 1830 (23) | 1477 (81) | 353 (19)  |       | 1137 (62)  | 121 (7)  | 84 (5)   | 451 (25)  | 37 (2)    |       |
| Underlying respiratory condition at discharge                  |           |           |           | -0.44 |            |          |          |           |           | 0.05  |
| Chronic respiratory condition <sup>7</sup>                     | 1824 (23) | 1680 (92) | 144 (8)   |       | 1146 (63)  | 133 (7)  | 95 (5)   | 414 (23)  | 36 (2)    |       |
| None                                                           | 6023 (77) | 4714 (78) | 1309 (22) |       | 3954 (66)  | 439 (7)  | 290 (5)  | 1249 (21) | 91 (2)    |       |
| Underlying non-respiratory condition at discharge              |           |           |           | -0.30 |            |          |          |           |           | 0.12  |
| Chronic non-respiratory condition <sup>8</sup>                 | 2723 (35) | 2379 (87) | 344 (13)  |       | 1668 (61)  | 196 (7)  | 138 (5)  | 685 (25)  | 36 (1)    |       |
| None                                                           | 5124 (65) | 4015 (78) | 1109 (22) |       | 3432 (67)  | 376 (7)  | 247 (5)  | 978 (19)  | 91 (2)    |       |
| COVID-19-like illness (CLI) ICD discharge codes                |           |           |           | 1.07  |            |          |          |           |           | -0.21 |
| ≥1 CLI clinical diagnosis code <sup>9</sup>                    | 4031 (51) | 2752 (68) | 1279 (32) |       | 2802 (70)  | 267 (7)  | 155 (4)  | 739 (18)  | 68 (2)    |       |
| No clinical diagnosis but ≥1 CLI sign or symptom <sup>10</sup> | 3816 (49) | 3642 (95) | 174 (5)   |       | 2298 (60)  | 305 (8)  | 230 (6)  | 924 (24)  | 59 (2)    |       |
| CLI diagnosis and placement among discharge codes              |           |           |           | 0.59  |            |          |          |           |           | -0.16 |
| CLI is first or primary diagnosis                              | 5330 (68) | 4055 (76) | 1275 (24) |       | 3598 (68)  | 376 (7)  | 253 (5)  | 1010 (19) | 93 (2)    |       |
| CLI is not first or primary diagnosis                          | 2517 (32) | 2339 (93) | 178 (7)   |       | 1502 (60)  | 196 (8)  | 132 (5)  | 653 (26)  | 34 (1)    |       |
| COVID-19 Vaccinations                                          |           |           |           | 0.73  |            |          |          |           |           |       |
| Unvaccinated                                                   | 5100 (65) | 3800 (75) | 1300 (25) |       | 5100 (100) | 0 (0)    | 0 (0)    | 0 (0)     | 0 (0)     |       |
| BNT162b2 (Pfizer-BioNTech)                                     | 1175 (15) | 1106 (94) | 69 (6)    |       | 0 (0)      | 224 (19) | 167 (14) | 784 (67)  | 0 (0)     |       |
| mRNA-1273 (Moderna)                                            | 1445 (18) | 1373 (95) | 72 (5)    |       | 0 (0)      | 348 (24) | 218 (15) | 879 (61)  | 0 (0)     |       |
| Ad26.COV2.S (Johnson & Johnson)                                | 127 (2)   | 115 (91)  | 12 (9)    |       | 0 (0)      | 0 (0)    | 0 (0)    | 0 (0)     | 127 (100) |       |

Note: All patients with indeterminate immunization status (receipt of dose-1 of mRNA vaccine 1-13 days prior to index test date) were excluded from table.

Abbreviations: Standard Mean Difference (SMD), COVID-like Illness (CLI), International Classification of Disease (ICD), Intensive Care Unit (ICU), Emergency Department (ED), Urgent Care (UC)

<sup>1</sup>Partially vaccinated with 1 dose: patients received dose-1 of mRNA vaccine ≥ 14 days prior to the index text date, had not received dose-2 by the index test date.

<sup>2</sup>Partially vaccinated with 2 doses: patients received dose-1 and dose-2 of mRNA vaccine, dose-2 receipt date 1-13 days prior to index date.

<sup>3</sup>Fully vaccinated: patients received single dose of J&J vaccine, dose-1 and dose-2 of mRNA vaccine, dose-2 of mRNA vaccine ≥ 14 days prior to the index text date.

<sup>4</sup>Standard Mean Difference (SMD) calculation compares unvaccinated to any receipt of vaccine (partial dose-1, partial dose-2 and full vaccination).

<sup>5</sup>Index date for each medical encounter was defined as the date of respiratory specimen collection associated with the most recent positive or negative SARS-CoV-2 test result prior to the medical encounter or the date of the medical encounter if testing only occurred after the admission or encounter date.

<sup>6</sup>Other race include Asian, Hawaiian or Other Pacific islander, American Indian or Alaskan Native, Other not-listed and multi-race.

<sup>7</sup>Underlying chronic respiratory conditions include asthma, chronic obstructive pulmonary disease (COPD), other lung disease.

<sup>8</sup>Underlying chronic non-respiratory conditions include: heart failure, ischemic heart disease, hypertension, other heart disease, stroke, other cerebrovascular disease, diabetes (type 1, 2 and due to other specified conditions), other metabolic disease, clinical obesity, clinically underweight, renal disease, liver disease, blood disorder, other immunosuppressive conditions, organ transplant recipient, cancer, dementia, neurological/musculoskeletal disorder or Down's syndrome.

<sup>9</sup>CLI clinical discharge diagnosis codes include: COVID-19 U codes, COVID-19 pneumonia, influenza pneumonia, other viral pneumonia, pneumonia and influenza (bacterial and other) influenza diagnoses, acute respiratory distress syndrome (ARDS), COPD exacerbation, asthma exacerbation, respiratory failure, other acute lower respiratory tract infection, sinusitis, acute upper respiratory tract infection.

<sup>10</sup>CLI signs and symptoms include: hemoptysis, cough, dyspnea unspecified, chest pain or breathing/painful respiration, asphyxia, hypoxemia, pleurisy, respiratory arrest, abnormal sputum, other specified symptoms and signs involving the circulatory and respiratory systems, fever, chills (without fever), diarrhea, disturbance of taste or smell, headache, myalgia, sepsis, other malaise, other fatigue, shock (unspecified), debility (unspecified), altered level of consciousness/mental state, weakness, nausea and vomiting, rash or other nonspecific skin eruption, abdominal pain

**Table S11. Characteristics of adults with medically attended COVID-19-like illness and the percent with laboratory-confirmed SARS-CoV-2 infection and percent unvaccinated, partially vaccinated with messenger RNA (mRNA) vaccines, or fully vaccinated with mRNA or Ad26.COV2.S vaccines, UNIVERSITY OF COLORADO**

|                                                  | Total Medical Events | SARS-CoV-2 Negatives | SARS-CoV-2 Positives | SMD  | Unvaccinated | Partially mRNA Vaccinated (1 dose) <sup>1</sup> | Partially mRNA Vaccinated (2 doses) <sup>2</sup> | Fully mRNA Vaccinated <sup>3</sup> | Fully Ad26.COV2.S Vaccinated <sup>3</sup> | SMD <sup>4</sup> |
|--------------------------------------------------|----------------------|----------------------|----------------------|------|--------------|-------------------------------------------------|--------------------------------------------------|------------------------------------|-------------------------------------------|------------------|
|                                                  | N (Col. %)           | N (Row %)            | N (Row %)            |      | N (Row %)    | N (Row %)                                       | N (Row %)                                        | N (Row %)                          | N (Row %)                                 |                  |
| <b>A. Hospitalizations</b>                       |                      |                      |                      |      |              |                                                 |                                                  |                                    |                                           |                  |
| All hospitalizations                             | 5314 (100)           | 4723 (89)            | 591 (11)             |      | 3861 (73)    | 221 (4)                                         | 211 (4)                                          | 1021 (19)                          | 0 (0)                                     |                  |
| Month of hospitalization index date <sup>5</sup> |                      |                      |                      | 0.31 |              |                                                 |                                                  |                                    |                                           | 0.27             |
| January                                          | 270 (5)              | 225 (83)             | 45 (17)              |      | 247 (91)     | 17 (6)                                          | 6 (2)                                            | 0 (0)                              | 0 (0)                                     |                  |
| February                                         | 777 (15)             | 700 (90)             | 77 (10)              |      | 614 (79)     | 73 (9)                                          | 52 (7)                                           | 38 (5)                             | 0 (0)                                     |                  |
| March                                            | 1125 (21)            | 1038 (92)            | 87 (8)               |      | 772 (69)     | 59 (5)                                          | 82 (7)                                           | 212 (19)                           | 0 (0)                                     |                  |
| April                                            | 1605 (30)            | 1407 (88)            | 198 (12)             |      | 1160 (72)    | 41 (3)                                          | 56 (3)                                           | 348 (22)                           | 0 (0)                                     |                  |
| May                                              | 1408 (26)            | 1231 (87)            | 177 (13)             |      | 988 (70)     | 24 (2)                                          | 14 (1)                                           | 382 (27)                           | 0 (0)                                     |                  |
| June                                             | 129 (2)              | 122 (95)             | 7 (5)                |      | 80 (62)      | 7 (5)                                           | 1 (1)                                            | 41 (32)                            | 0 (0)                                     |                  |
| Site-regions                                     |                      |                      |                      | 0.04 |              |                                                 |                                                  |                                    |                                           | 0.37             |
| Site-region 1                                    | 1585 (30)            | 1413 (89)            | 172 (11)             |      | 1153 (73)    | 64 (4)                                          | 62 (4)                                           | 306 (19)                           | 0 (0)                                     |                  |
| Site-region 2                                    | 1927 (36)            | 1719 (89)            | 208 (11)             |      | 1239 (64)    | 106 (6)                                         | 98 (5)                                           | 484 (25)                           | 0 (0)                                     |                  |
| Site-region 3                                    | 1802 (34)            | 1591 (88)            | 211 (12)             |      | 1469 (82)    | 51 (3)                                          | 51 (3)                                           | 231 (13)                           | 0 (0)                                     |                  |
| Age groups                                       |                      |                      |                      | 0.32 |              |                                                 |                                                  |                                    |                                           | 0.40             |
| 50-64 years                                      | 1195 (22)            | 989 (83)             | 206 (17)             |      | 1020 (85)    | 36 (3)                                          | 41 (3)                                           | 98 (8)                             | 0 (0)                                     |                  |
| 65-74 years                                      | 1787 (34)            | 1615 (90)            | 172 (10)             |      | 1302 (73)    | 68 (4)                                          | 73 (4)                                           | 344 (19)                           | 0 (0)                                     |                  |
| 75-84 years                                      | 1518 (29)            | 1375 (91)            | 143 (9)              |      | 979 (64)     | 81 (5)                                          | 69 (5)                                           | 389 (26)                           | 0 (0)                                     |                  |
| ≥85 years                                        | 814 (15)             | 744 (91)             | 70 (9)               |      | 560 (69)     | 36 (4)                                          | 28 (3)                                           | 190 (23)                           | 0 (0)                                     |                  |
| Race (regardless of ethnicity)                   |                      |                      |                      | 0.30 |              |                                                 |                                                  |                                    |                                           | 0.30             |
| White                                            | 4395 (83)            | 3970 (90)            | 425 (10)             |      | 3093 (70)    | 189 (4)                                         | 186 (4)                                          | 927 (21)                           | 0 (0)                                     |                  |
| Black                                            | 338 (6)              | 286 (85)             | 52 (15)              |      | 294 (87)     | 11 (3)                                          | 5 (1)                                            | 28 (8)                             | 0 (0)                                     |                  |
| Other <sup>6</sup>                               | 205 (4)              | 162 (79)             | 43 (21)              |      | 160 (78)     | 12 (6)                                          | 8 (4)                                            | 25 (12)                            | 0 (0)                                     |                  |
| Unknown                                          | 376 (7)              | 305 (81)             | 71 (19)              |      | 314 (84)     | 9 (2)                                           | 12 (3)                                           | 41 (11)                            | 0 (0)                                     |                  |
| Ethnicity (regardless of race)                   |                      |                      |                      | 0.28 |              |                                                 |                                                  |                                    |                                           | 0.20             |
| Hispanic                                         | 515 (10)             | 414 (80)             | 101 (20)             |      | 418 (81)     | 21 (4)                                          | 21 (4)                                           | 55 (11)                            | 0 (0)                                     |                  |
| Non-Hispanic                                     | 4761 (90)            | 4279 (90)            | 482 (10)             |      | 3413 (72)    | 198 (4)                                         | 189 (4)                                          | 961 (20)                           | 0 (0)                                     |                  |
| Unknown                                          | 38 (1)               | 30 (79)              | 8 (21)               |      | 30 (79)      | 2 (5)                                           | 1 (3)                                            | 5 (13)                             | 0 (0)                                     |                  |



|                                                                |           |            |          |       |            |          |          |           |       |  |       |
|----------------------------------------------------------------|-----------|------------|----------|-------|------------|----------|----------|-----------|-------|--|-------|
| Underlying respiratory condition at discharge                  |           |            |          | 0.29  |            |          |          |           |       |  | -0.08 |
| Chronic respiratory condition <sup>7</sup>                     | 3547 (67) | 3084 (87)  | 463 (13) |       | 2618 (74)  | 149 (4)  | 136 (4)  | 644 (18)  | 0 (0) |  |       |
| None                                                           | 1767 (33) | 1639 (93)  | 128 (7)  |       | 1243 (70)  | 72 (4)   | 75 (4)   | 377 (21)  | 0 (0) |  |       |
| Underlying non-respiratory condition at discharge              |           |            |          | -0.23 |            |          |          |           |       |  | 0.11  |
| Chronic non-respiratory condition <sup>8</sup>                 | 5248 (99) | 4684 (89)  | 564 (11) |       | 3802 (72)  | 221 (4)  | 209 (4)  | 1016 (19) | 0 (0) |  |       |
| None                                                           | 66 (1)    | 39 (59)    | 27 (41)  |       | 59 (89)    | 0 (0)    | 2 (3)    | 5 (8)     | 0 (0) |  |       |
| COVID-19-like illness (CLI) ICD discharge codes                |           |            |          | 1.09  |            |          |          |           |       |  | -0.15 |
| ≥1 CLI clinical diagnosis code <sup>9</sup>                    | 3501 (66) | 2913 (83)  | 588 (17) |       | 2617 (75)  | 143 (4)  | 131 (4)  | 610 (17)  | 0 (0) |  |       |
| No clinical diagnosis but ≥1 CLI sign or symptom <sup>10</sup> | 1813 (34) | 1810 (100) | 3 (0)    |       | 1244 (69)  | 78 (4)   | 80 (4)   | 411 (23)  | 0 (0) |  |       |
| CLI diagnosis and placement among discharge codes              |           |            |          | 1.73  |            |          |          |           |       |  | -0.29 |
| CLI is first or primary diagnosis                              | 911 (17)  | 470 (52)   | 441 (48) |       | 768 (84)   | 22 (2)   | 29 (3)   | 92 (10)   | 0 (0) |  |       |
| CLI is not first or primary diagnosis                          | 4403 (83) | 4253 (97)  | 150 (3)  |       | 3093 (70)  | 199 (5)  | 182 (4)  | 929 (21)  | 0 (0) |  |       |
| Intensive care unit (ICU) admissions                           |           |            |          | 0.00  |            |          |          |           |       |  | -0.06 |
| Admitted to ICU                                                | 1454 (27) | 1293 (89)  | 161 (11) |       | 1086 (75)  | 55 (4)   | 49 (3)   | 264 (18)  | 0 (0) |  |       |
| Not in ICU during hospitalization                              | 3860 (73) | 3430 (89)  | 430 (11) |       | 2775 (72)  | 166 (4)  | 162 (4)  | 757 (20)  | 0 (0) |  |       |
| COVID-19 Vaccinations                                          |           |            |          | 0.71  |            |          |          |           |       |  |       |
| Unvaccinated                                                   | 3861 (73) | 3302 (86)  | 559 (14) |       | 3861 (100) | 0 (0)    | 0 (0)    | 0 (0)     | 0 (0) |  |       |
| BNT162b2 (Pfizer-BioNTech)                                     | 820 (15)  | 794 (97)   | 26 (3)   |       | 0 (0)      | 100 (12) | 125 (15) | 595 (73)  | 0 (0) |  |       |
| mRNA-1273 (Moderna)                                            | 633 (12)  | 627 (99)   | 6 (1)    |       | 0 (0)      | 121 (19) | 86 (14)  | 426 (67)  | 0 (0) |  |       |
| Ad26.COV2.S (Johnson & Johnson)                                | 0 (0)     | 0 (0)      | 0 (0)    |       | 0 (0)      | 0 (0)    | 0 (0)    | 0 (0)     | 0 (0) |  |       |

Note: All patients with indeterminate immunization status (receipt of dose-1 of mRNA vaccine 1-13 days prior to index test date) were excluded from table.

Abbreviations: Standard Mean Difference (SMD), COVID-like Illness (CLI), International Classification of Disease (ICD), Intensive Care Unit (ICU), Emergency Department (ED), Urgent Care (UC)

<sup>1</sup>Partially vaccinated with 1 dose: patients received dose-1 of mRNA vaccine ≥ 14 days prior to the index text date, had not received dose-2 by the index test date.

<sup>2</sup>Partially vaccinated with 2 doses: patients received dose-1 and dose-2 of mRNA vaccine, dose-2 receipt date 1-13 days prior to index date.

<sup>3</sup>Fully vaccinated: patients received single dose of J&J vaccine, dose-1 and dose-2 of mRNA vaccine, dose-2 of mRNA vaccine ≥ 14 days prior to the index text date.

<sup>4</sup>Standard Mean Difference (SMD) calculation compares unvaccinated to any receipt of vaccine (partial dose-1, partial dose-2 and full vaccination).

<sup>5</sup>Index date for each medical encounter was defined as the date of respiratory specimen collection associated with the most recent positive or negative SARS-CoV-2 test result prior to the medical encounter or the date of the medical encounter if testing only occurred after the admission or encounter date.

<sup>6</sup>Other race include Asian, Hawaiian or Other Pacific islander, American Indian or Alaskan Native, Other not-listed and multi-race.

<sup>7</sup>Underlying chronic respiratory conditions include asthma, chronic obstructive pulmonary disease (COPD), other lung disease.

<sup>8</sup>Underlying chronic non-respiratory conditions include heart failure, ischemic heart disease, hypertension, other heart disease, stroke, other cerebrovascular disease, diabetes (type 1, 2 and due to other specified conditions), other metabolic disease, clinical obesity, clinically underweight, renal disease, liver disease, blood disorder, other immunosuppressive conditions, organ transplant recipient, cancer, dementia, neurological/musculoskeletal disorder or Down's syndrome.

<sup>9</sup>CLI clinical discharge diagnosis codes include: COVID-19 U codes, COVID-19 pneumonia, influenza pneumonia, other viral pneumonia, pneumonia and influenza (bacterial and other) influenza diagnoses, acute respiratory distress syndrome (ARDS), COPD exacerbation, asthma exacerbation, respiratory failure, other acute lower respiratory tract infection, sinusitis, acute upper respiratory tract infection.

<sup>10</sup>CLI signs and symptoms include: hemoptysis, cough, dyspnea unspecified, chest pain or breathing/painful respiration, asphyxia, hypoxemia, pleurisy, respiratory arrest, abnormal sputum, other specified symptoms and signs involving the circulatory and respiratory systems, fever, chills (without fever), diarrhea, disturbance of taste or smell, headache, myalgia, sepsis, other malaise, other fatigue, shock (unspecified), debility (unspecified), altered level of consciousness/mental state, weakness, nausea and vomiting, rash or other nonspecific skin eruption, abdominal pain

Table S12. Characteristics of Full Sample - Hospitalizations

|                                                  | Total<br>Medical<br>Events<br>N (Col. %) | SARS-<br>CoV-2<br>Negatives<br>N (Row %) | SARS-<br>CoV-2<br>Positives<br>N (Row %) | SMD   | Unvaccinated<br>N (Row %) | Partially<br>mRNA<br>Vaccinated<br>(1 dose) <sup>1</sup><br>N (Row %) | Partially mRNA Vaccinated<br>(2 doses) <sup>2</sup><br>N (Row %) | Fully<br>mRNA<br>Vaccinated <sup>3</sup><br>N (Row %) | Fully<br>Ad26.COVS.S<br>Vaccinated <sup>3</sup><br>N (Row %) | SMD <sup>4</sup> |
|--------------------------------------------------|------------------------------------------|------------------------------------------|------------------------------------------|-------|---------------------------|-----------------------------------------------------------------------|------------------------------------------------------------------|-------------------------------------------------------|--------------------------------------------------------------|------------------|
| <b>A. Hospitalizations</b>                       |                                          |                                          |                                          |       |                           |                                                                       |                                                                  |                                                       |                                                              |                  |
| All hospitalizations                             | 41552 (100)                              | 37231 (90)                               | 4321 (10)                                |       | 20406 (49)                | 3083 (7)                                                              | 2482 (6)                                                         | 14874 (36)                                            | 707 (2)                                                      |                  |
| Events per person                                |                                          |                                          |                                          | -0.13 |                           |                                                                       |                                                                  |                                                       |                                                              | 0.05             |
| First hospitalization per person                 | 40367 (97)                               | 36096 (89)                               | 4271 (11)                                |       | 19903 (49)                | 3003 (7)                                                              | 2456 (6)                                                         | 14361 (36)                                            | 644 (2)                                                      |                  |
| Repeat hospitalization per person                | 1185 (3)                                 | 1135 (96)                                | 50 (4)                                   |       | 503 (42)                  | 80 (7)                                                                | 26 (2)                                                           | 513 (43)                                              | 63 (5)                                                       |                  |
| Month of hospitalization index date <sup>5</sup> |                                          |                                          |                                          | 0.36  |                           |                                                                       |                                                                  |                                                       |                                                              | 0.51             |
| January                                          | 1063 (3)                                 | 766 (72)                                 | 297 (28)                                 |       | 980 (92)                  | 62 (6)                                                                | 20 (2)                                                           | 1 (0)                                                 | 0 (0)                                                        |                  |
| February                                         | 4016 (10)                                | 3350 (83)                                | 666 (17)                                 |       | 2969 (74)                 | 545 (14)                                                              | 355 (9)                                                          | 147 (4)                                               | 0 (0)                                                        |                  |
| March                                            | 8873 (21)                                | 8084 (91)                                | 789 (9)                                  |       | 4714 (53)                 | 989 (11)                                                              | 1022 (12)                                                        | 2125 (24)                                             | 23 (0)                                                       |                  |
| April                                            | 12143 (29)                               | 10873 (90)                               | 1270 (10)                                |       | 5619 (46)                 | 801 (7)                                                               | 757 (6)                                                          | 4735 (39)                                             | 231 (2)                                                      |                  |
| May                                              | 11943 (29)                               | 10843 (91)                               | 1100 (9)                                 |       | 4971 (42)                 | 560 (5)                                                               | 296 (2)                                                          | 5798 (49)                                             | 318 (3)                                                      |                  |
| June                                             | 3514 (8)                                 | 3315 (94)                                | 199 (6)                                  |       | 1153 (33)                 | 126 (4)                                                               | 32 (1)                                                           | 2068 (59)                                             | 135 (4)                                                      |                  |
| Sites                                            |                                          |                                          |                                          | 0.56  |                           |                                                                       |                                                                  |                                                       |                                                              | 0.78             |
| Columbia University                              | 3126 (8)                                 | 2458 (79)                                | 668 (21)                                 |       | 2181 (70)                 | 216 (7)                                                               | 103 (3)                                                          | 588(19)                                               | 38 (1)                                                       |                  |
| HealthPartners                                   | 989 (2)                                  | 928 (94)                                 | 61 (6)                                   |       | 389 (39)                  | 98 (10)                                                               | 104 (11)                                                         | 390(39)                                               | 8 (1)                                                        |                  |
| Intermountain Healthcare                         | 3910 (9)                                 | 3353 (86)                                | 557 (14)                                 |       | 1917 (49)                 | 392 (10)                                                              | 278 (7)                                                          | 1236(32)                                              | 87 (2)                                                       |                  |
| Kaiser Permanente Northern California            | 13824 (33)                               | 13159 (95)                               | 665 (5)                                  |       | 3559 (26)                 | 1021 (7)                                                              | 980 (7)                                                          | 7874(57)                                              | 390 (3)                                                      |                  |
| Kaiser Permanente Northwest                      | 1952 (5)                                 | 1834 (94)                                | 118 (6)                                  |       | 906 (46)                  | 210 (11)                                                              | 132 (7)                                                          | 651(33)                                               | 53 (3)                                                       |                  |
| Regenstrief Institute                            | 12437 (30)                               | 10776 (87)                               | 1661 (13)                                |       | 7593 (61)                 | 925 (7)                                                               | 674 (5)                                                          | 3114(25)                                              | 131 (1)                                                      |                  |
| University of Colorado                           | 5314 (13)                                | 4723 (89)                                | 591 (11)                                 |       | 3861 (73)                 | 221 (4)                                                               | 211 (4)                                                          | 1021(19)                                              | 0 (0)                                                        |                  |
| Site-regions                                     |                                          |                                          |                                          | 0.63  |                           |                                                                       |                                                                  |                                                       |                                                              | 0.82             |
| Columbia University - site-region 1              | 3126 (8)                                 | 2458 (79)                                | 668 (21)                                 |       | 2181 (70)                 | 216 (7)                                                               | 103 (3)                                                          | 588 (19)                                              | 38 (1)                                                       |                  |
| HealthPartners - site-region 1                   | 973 (2)                                  | 916 (94)                                 | 57 (6)                                   |       | 381 (39)                  | 93 (10)                                                               | 103 (11)                                                         | 388 (40)                                              | 8 (1)                                                        |                  |
| HealthPartners - site-region 2                   | 16 (0)                                   | 12 (75)                                  | <5                                       |       | 8 (50)                    | 5 (31)                                                                | <5                                                               | <5                                                    | 0 (0)                                                        |                  |
| Intermountain Healthcare - site-region 1         | 248 (1)                                  | 219 (88)                                 | 29 (12)                                  |       | 133 (54)                  | 19 (8)                                                                | 16 (6)                                                           | 71 (29)                                               | 9 (4)                                                        |                  |

|                                                       |           |           |          |           |          |         |           |         |
|-------------------------------------------------------|-----------|-----------|----------|-----------|----------|---------|-----------|---------|
| Intermountain Healthcare - site-region 2              | 238 (1)   | 204 (86)  | 34 (14)  | 101 (42)  | 27 (11)  | 13 (5)  | 93 (39)   | 4 (2)   |
| Intermountain Healthcare - site-region 3              | 1434 (3)  | 1253 (87) | 181 (13) | 654 (46)  | 147 (10) | 95 (7)  | 510 (36)  | 28 (2)  |
| Intermountain Healthcare - site-region 4              | 721 (2)   | 630 (87)  | 91 (13)  | 340 (47)  | 66 (9)   | 52 (7)  | 257 (36)  | 6 (1)   |
| Intermountain Healthcare - site-region 5              | 67 (0)    | 58 (87)   | 9 (13)   | 34 (51)   | 6 (9)    | 9 (13)  | 17 (25)   | 1 (1)   |
| Intermountain Healthcare - site-region 6              | 479 (1)   | 411 (86)  | 68 (14)  | 245 (51)  | 51 (11)  | 38 (8)  | 133 (28)  | 12 (3)  |
| Intermountain Healthcare - site-region 7              | 74 (0)    | 61 (82)   | 13 (18)  | 37 (50)   | 7 (9)    | 9 (12)  | 20 (27)   | 1 (1)   |
| Intermountain Healthcare - site-region 8              | 649 (2)   | 517 (80)  | 132 (20) | 373 (57)  | 69 (11)  | 46 (7)  | 135 (21)  | 26 (4)  |
| Kaiser Permanente Northern California – site-region 1 | 705 (2)   | 651 (92)  | 54 (8)   | 223 (32)  | 68 (10)  | 49 (7)  | 347 (49)  | 18 (3)  |
| Kaiser Permanente Northern California – site-region 2 | 510 (1)   | 453 (89)  | 57 (11)  | 211 (41)  | 41 (8)   | 25 (5)  | 225 (44)  | 8 (2)   |
| Kaiser Permanente Northern California – site-region 3 | 3200 (8)  | 2981 (93) | 219 (7)  | 997 (31)  | 255 (8)  | 204 (6) | 1683 (53) | 61 (2)  |
| Kaiser Permanente Northern California – site-region 4 | 5660 (14) | 5478 (97) | 182 (3)  | 1262 (22) | 370 (7)  | 432 (8) | 3410 (60) | 186 (3) |
| Kaiser Permanente Northern California – site-region 5 | 1660 (4)  | 1605 (97) | 55 (3)   | 338 (20)  | 117 (7)  | 118 (7) | 1023 (62) | 64 (4)  |
| Kaiser Permanente Northern California – site-region 6 | 676 (2)   | 663 (98)  | 13 (2)   | 123 (18)  | 57 (8)   | 47 (7)  | 428 (63)  | 21 (3)  |
| Kaiser Permanente Northern California – site-region 7 | 267 (1)   | 243 (91)  | 24 (9)   | 91 (34)   | 19 (7)   | 20 (7)  | 132 (49)  | 5 (2)   |
| Kaiser Permanente Northern California – site-region 8 | 1146 (3)  | 1085 (95) | 61 (5)   | 314 (27)  | 94 (8)   | 85 (7)  | 626 (55)  | 27 (2)  |
| Kaiser Permanente Northwest - site-region 1           | 1376 (3)  | 1301 (95) | 75 (5)   | 624 (45)  | 159 (12) | 92 (7)  | 455 (33)  | 46 (3)  |
| Kaiser Permanente Northwest - site-region 2           | 394 (1)   | 362 (92)  | 32 (8)   | 204 (52)  | 36 (9)   | 20 (5)  | 128 (32)  | 6 (2)   |
| Kaiser Permanente Northwest - site-region 3           | 182 (0)   | 171 (94)  | 11 (6)   | 78 (43)   | 15 (8)   | 20 (11) | 68 (37)   | 1 (1)   |
| Regenstrief Institute - site-region 1                 | 2797 (7)  | 2386 (85) | 411 (15) | 1966 (70) | 173 (6)  | 114 (4) | 514 (18)  | 30 (1)  |
| Regenstrief Institute - site-region 2                 | 565 (1)   | 458 (81)  | 107 (19) | 317 (56)  | 44 (8)   | 16 (3)  | 180 (32)  | 8 (1)   |
| Regenstrief Institute - site-region 3                 | 170 (0)   | 122 (72)  | 48 (28)  | 116 (68)  | 9 (5)    | 8 (5)   | 37 (22)   | 0 (0)   |
| Regenstrief Institute - site-region 4                 | 934 (2)   | 779 (83)  | 155 (17) | 577 (62)  | 63 (7)   | 63 (7)  | 222 (24)  | 9 (1)   |
| Regenstrief Institute - site-region 5                 | 3754 (9)  | 3334 (89) | 420 (11) | 2181 (58) | 302 (8)  | 223 (6) | 1002 (27) | 46 (1)  |
| Regenstrief Institute - site-region 6                 | 1151 (3)  | 991 (86)  | 160 (14) | 681 (59)  | 104 (9)  | 65 (6)  | 293 (25)  | 8 (1)   |
| Regenstrief Institute - site-region 7                 | 114 (0)   | 108 (95)  | 6 (5)    | 64 (56)   | 8 (7)    | 7 (6)   | 33 (29)   | 2 (2)   |
| Regenstrief Institute - site-region 8                 | 856 (2)   | 735 (86)  | 121 (14) | 513 (60)  | 65 (8)   | 51 (6)  | 224 (26)  | 3 (0)   |
| Regenstrief Institute - site-region 9                 | 778 (2)   | 711 (91)  | 67 (9)   | 371 (48)  | 65 (8)   | 50 (6)  | 279 (36)  | 13 (2)  |
| Regenstrief Institute - site-region 10                | 271 (1)   | 256 (94)  | 15 (6)   | 142 (52)  | 19 (7)   | 13 (5)  | 95 (35)   | 2 (1)   |
| Regenstrief Institute - site-region missing           | 1047 (3)  | 896 (86)  | 151 (14) | 665 (64)  | 73 (7)   | 64 (6)  | 235 (22)  | 10 (1)  |
| University of Colorado - site-region 1                | 1585 (4)  | 1413 (89) | 172 (11) | 1153 (73) | 64 (4)   | 62 (4)  | 306 (19)  | 0 (0)   |

|                                                                |            |            |           |       |            |          |          |           |         |       |
|----------------------------------------------------------------|------------|------------|-----------|-------|------------|----------|----------|-----------|---------|-------|
| University of Colorado - site-region 2                         | 1927 (5)   | 1719 (89)  | 208 (11)  |       | 1239 (64)  | 106 (6)  | 98 (5)   | 484 (25)  | 0 (0)   |       |
| University of Colorado - site-region 3                         | 1802 (4)   | 1591 (88)  | 211 (12)  |       | 1469 (82)  | 51 (3)   | 51 (3)   | 231 (13)  | 0 (0)   |       |
| Age groups                                                     |            |            |           | 0.26  |            |          |          |           |         | 0.34  |
| 50-64 years                                                    | 8764 (21)  | 7436 (85)  | 1328 (15) |       | 5532 (63)  | 585 (7)  | 467 (5)  | 1898(22)  | 282 (3) |       |
| 65-74 years                                                    | 13158 (32) | 11839 (90) | 1319 (10) |       | 6681 (51)  | 1014 (8) | 795 (6)  | 4481(34)  | 187 (1) |       |
| 75-84 years                                                    | 12282 (30) | 11193 (91) | 1089 (9)  |       | 5233 (43)  | 935 (8)  | 772 (6)  | 5189(42)  | 153 (1) |       |
| ≥85 years                                                      | 7348 (18)  | 6763 (92)  | 585 (8)   |       | 2960 (40)  | 549 (7)  | 448 (6)  | 3306(45)  | 85 (1)  |       |
| Race (regardless of ethnicity)                                 |            |            |           | 0.29  |            |          |          |           |         | 0.27  |
| White                                                          | 29019 (70) | 26357 (91) | 2662 (9)  |       | 13886 (48) | 2246 (8) | 1779 (6) | 10655(37) | 453 (2) |       |
| Black                                                          | 3902 (9)   | 3414 (87)  | 488 (13)  |       | 2393 (61)  | 269 (7)  | 194 (5)  | 961(25)   | 85 (2)  |       |
| Other <sup>6</sup>                                             | 2892 (7)   | 2692 (93)  | 200 (7)   |       | 913 (32)   | 183 (6)  | 223 (8)  | 1496(52)  | 77 (3)  |       |
| Unknown                                                        | 5739 (14)  | 4768 (83)  | 971 (17)  |       | 3214 (56)  | 385 (7)  | 286 (5)  | 1762(31)  | 92 (2)  |       |
| Ethnicity (regardless of race)                                 |            |            |           | 0.23  |            |          |          |           |         | 0.07  |
| Hispanic                                                       | 4574 (11)  | 3825 (84)  | 749 (16)  |       | 2376 (52)  | 307 (7)  | 264 (6)  | 1540(34)  | 87 (2)  |       |
| Non-Hispanic                                                   | 31069 (75) | 28190 (91) | 2879 (9)  |       | 15361 (49) | 2318 (7) | 1863 (6) | 11067(36) | 460 (1) |       |
| Unknown                                                        | 5909 (14)  | 5216 (88)  | 693 (12)  |       | 2669 (45)  | 458 (8)  | 355 (6)  | 2267(38)  | 160 (3) |       |
| Underlying respiratory condition at discharge                  |            |            |           | -0.06 |            |          |          |           |         |       |
| Chronic respiratory condition <sup>7</sup>                     | 27423 (66) | 24689 (90) | 2734 (10) |       | 13018 (47) | 2033 (7) | 1634 (6) | 10257(37) | 481 (2) |       |
| None                                                           | 14129 (34) | 12542 (89) | 1587 (11) |       | 7388 (52)  | 1050 (7) | 848 (6)  | 4617(33)  | 226 (2) |       |
| Underlying non-respiratory condition at discharge              |            |            |           | -0.26 |            |          |          |           |         | 0.18  |
| Chronic non-respiratory condition <sup>8</sup>                 | 37899 (91) | 34289 (90) | 3610 (10) |       | 18089 (48) | 2835 (7) | 2302 (6) | 13999(37) | 674 (2) |       |
| None                                                           | 3653 (9)   | 2942 (81)  | 711 (19)  |       | 2317 (63)  | 248 (7)  | 180 (5)  | 875(24)   | 33 (1)  |       |
| COVID-19-like illness (CLI) ICD discharge codes                |            |            |           | 0.85  |            |          |          |           |         | -0.02 |
| ≥1 CLI clinical diagnosis code <sup>9</sup>                    | 29941 (72) | 25706 (86) | 4235 (14) |       | 14805 (49) | 2191 (7) | 1748 (6) | 10686(36) | 511 (2) |       |
| No clinical diagnosis but ≥1 CLI sign or symptom <sup>10</sup> | 11611 (28) | 11525 (99) | 86 (1)    |       | 5601 (48)  | 892 (8)  | 734 (6)  | 4188(36)  | 196 (2) |       |
| CLI diagnosis and placement among discharge codes              |            |            |           | 1.07  |            |          |          |           |         | -0.37 |
| CLI is first or primary diagnosis                              | 8699 (21)  | 6005 (69)  | 2694 (31) |       | 5815 (67)  | 600 (7)  | 400 (5)  | 1770(20)  | 114 (2) |       |
| CLI is not first or primary diagnosis                          | 32853 (79) | 31226 (95) | 1627 (5)  |       | 14591 (44) | 2483 (8) | 2082 (6) | 13104(40) | 593 (2) |       |

|                                      |            |            |           |      |             |           |           |           |           |       |
|--------------------------------------|------------|------------|-----------|------|-------------|-----------|-----------|-----------|-----------|-------|
| Intensive care unit (ICU) admissions |            |            |           | 0.01 |             |           |           |           |           | -0.10 |
| Admitted to ICU                      | 7394 (18)  | 6606 (89)  | 788 (11)  |      | 4024 (54)   | 512 (7)   | 388 (5)   | 2359(32)  | 111 (2)   |       |
| Not in ICU during hospitalization    | 34158 (82) | 30625 (90) | 3533 (10) |      | 16382 (48)  | 2571 (8)  | 2094 (6)  | 12515(37) | 596 (2)   |       |
| COVID-19 Vaccinations                |            |            |           | 0.95 |             |           |           |           |           | NA    |
| Unvaccinated                         | 20406 (49) | 16711 (82) | 3695 (18) |      | 20406 (100) |           |           |           |           |       |
| BNT162b2 (Pfizer-BioNTech)           | 11292 (27) | 10932 (97) | 360 (3)   |      |             | 1444 (13) | 1348 (12) | 8500(75)  |           |       |
| mRNA-1273 (Moderna)                  | 9147 (22)  | 8911 (97)  | 236 (3)   |      |             | 1639 (18) | 1134 (12) | 6374(70)  |           |       |
| Ad26.COV2.S (Johnson & Johnson)      | 707 (2)    | 677 (96)   | 30 (4)    |      |             |           |           |           | 707 (100) |       |

Note: All patients with indeterminate immunization status (receipt of dose-1 of mRNA vaccine 1-13 days prior to index test date) were excluded.

Abbreviations: Standardized Mean Difference (SMD), COVID-like Illness (CLI), International Classification of Disease (ICD), Intensive Care Unit (ICU), Emergency Department (ED), Urgent Care (UC), Not Applicable (NA)

<sup>1</sup>Partially vaccinated with 1 dose: patients received dose-1 of mRNA vaccine  $\geq$  14 days prior to the index text date had not received dose-2 by the index test date.

<sup>2</sup>Partially vaccinated with 2 doses: patients received dose-1 and dose-2 of mRNA vaccine, dose-2 receipt date 1-13 days prior to index date.

<sup>3</sup>Fully vaccinated: patients received single dose of J&J vaccine, dose-1 and dose-2 of mRNA vaccine, or dose-2 of mRNA vaccine  $\geq$  14 days prior to the index text date.

<sup>4</sup>Standardized Mean Difference (SMD) calculation compares unvaccinated to any receipt of vaccine (partial dose-1, partial dose-2 and full vaccination).

<sup>5</sup>Index date for each medical encounter was defined as the date of respiratory specimen collection associated with the most recent positive or negative SARS-CoV-2 test result prior to the medical encounter or the date of the medical encounter if testing only occurred after the admission or encounter date.

<sup>6</sup>Other race include Asian, Hawaiian or Other Pacific islander, American Indian or Alaskan Native, Other not-listed and multi-race.

<sup>7</sup>Underlying chronic respiratory conditions include asthma, chronic obstructive pulmonary disease (COPD), other lung disease.

<sup>8</sup>Underlying chronic non-respiratory conditions include: heart failure, ischemic heart disease, hypertension, other heart disease, stroke, other cerebrovascular disease, diabetes (type 1, 2 and due to other specified conditions), other metabolic disease, clinical obesity, clinically underweight, renal disease, liver disease, blood disorder, other immunosuppressive conditions, organ transplant recipient, cancer, dementia, neurological/musculoskeletal disorder or Down's syndrome.

<sup>9</sup>CLI clinical discharge diagnosis codes include: COVID-19 U codes, COVID-19 pneumonia, influenza pneumonia, other viral pneumonia, pneumonia and influenza (bacterial and other), influenza disease, acute respiratory distress syndrome (ARDS), COPD exacerbation, asthma exacerbation, respiratory failure, other acute lower respiratory tract infection, sinusitis, acute upper respiratory tract infection.

<sup>10</sup>CLI signs and symptoms include: hemoptysis, cough, dyspnea unspecified, chest pain or breathing/painful respiration, asphyxia, hypoxemia, pleurisy, respiratory arrest, abnormal sputum, other specified symptoms and signs involving the circulatory and respiratory systems, fever, chills (without fever), diarrhea, disturbance of taste or smell, headache, myalgia, sepsis, other malaise, other fatigue, shock (unspecified), debility (unspecified), altered level of consciousness/mental state, weakness, nausea and vomiting, rash or other nonspecific skin eruption, abdominal pain

Table S13. Characteristics of Full Sample – ED/UC

|                                                                 | Total Medical<br>Events<br>N (Col. %) | SARS-CoV-2<br>Negatives<br>N (Row %) | SARS-CoV-2<br>Positives<br>N (Row %) | SMD  | Unvaccinated<br>N (Row %) | Partially<br>mRNA<br>Vaccinated<br>(1 dose) <sup>1</sup><br>N (Row %) | Partially<br>mRNA<br>Vaccinated<br>(2 doses) <sup>2</sup><br>N (Row %) | Fully mRNA<br>Vaccinated <sup>3</sup><br>N (Row %) | Fully<br>Ad26.COV2.S<br>Vaccinated <sup>3</sup><br>N (Row %) | SMD <sup>4</sup> |
|-----------------------------------------------------------------|---------------------------------------|--------------------------------------|--------------------------------------|------|---------------------------|-----------------------------------------------------------------------|------------------------------------------------------------------------|----------------------------------------------------|--------------------------------------------------------------|------------------|
| <b>B. Emergency Department (ED) and Urgent Care (UC) Visits</b> |                                       |                                      |                                      |      |                           |                                                                       |                                                                        |                                                    |                                                              |                  |
| All ED and UC Visits                                            | 21522 (100)                           | 18271 (85)                           | 3251 (15)                            |      | 11812 (55)                | 1920 (9)                                                              | 1269 (6)                                                               | 6065 (28)                                          | 456 (2)                                                      |                  |
| Events per person                                               |                                       |                                      |                                      | 0.09 |                           |                                                                       |                                                                        |                                                    |                                                              | 0.00             |
| First ED/UC event per person                                    | 18537 (86)                            | 15822 (85)                           | 2715 (15)                            |      | 10190 (55)                | 1688 (9)                                                              | 1088 (6)                                                               | 5181 (28)                                          | 390 (2)                                                      |                  |
| Repeat ED/UC event per person                                   | 2985 (14)                             | 2449 (82)                            | 536 (18)                             |      | 1622 (54)                 | 232 (8)                                                               | 181 (6)                                                                | 884 (30)                                           | 66 (2)                                                       |                  |
| By medical event setting                                        |                                       |                                      |                                      | 0.00 |                           |                                                                       |                                                                        |                                                    |                                                              | 0.14             |
| ED visits                                                       | 18375 (85)                            | 15598 (85)                           | 2777 (15)                            |      | 10351 (56)                | 1582 (9)                                                              | 1069 (6)                                                               | 5000 (27)                                          | 373 (2)                                                      |                  |
| UC visits                                                       | 3147 (15)                             | 2673 (85)                            | 474 (15)                             |      | 1461 (46)                 | 338 (11)                                                              | 200 (6)                                                                | 1065 (34)                                          | 83 (3)                                                       |                  |
| Month of ED/UC event <sup>5</sup>                               |                                       |                                      |                                      | 0.22 |                           |                                                                       |                                                                        |                                                    |                                                              | 0.40             |
| January                                                         | 353 (2)                               | 237 (67)                             | 116 (33)                             |      | 335 (95)                  | 16 (5)                                                                | 1 (0)                                                                  | 1 (0)                                              | 0 (0)                                                        |                  |
| February                                                        | 2398 (11)                             | 2001 (83)                            | 397 (17)                             |      | 1732 (72)                 | 374 (16)                                                              | 196 (8)                                                                | 96 (4)                                             | 0 (0)                                                        |                  |
| March                                                           | 4486 (21)                             | 3925 (87)                            | 561 (13)                             |      | 2655 (59)                 | 610 (14)                                                              | 418 (9)                                                                | 775 (17)                                           | 28 (1)                                                       |                  |
| April                                                           | 5956 (28)                             | 5039 (85)                            | 917 (15)                             |      | 3049 (51)                 | 523 (9)                                                               | 433 (7)                                                                | 1803 (30)                                          | 148 (2)                                                      |                  |
| May                                                             | 6069 (28)                             | 5142 (85)                            | 927 (15)                             |      | 2954 (49)                 | 309 (5)                                                               | 185 (3)                                                                | 2430 (40)                                          | 191 (3)                                                      |                  |
| June                                                            | 2260 (11)                             | 1927 (85)                            | 333 (15)                             |      | 1087 (48)                 | 88 (4)                                                                | 36 (2)                                                                 | 960 (42)                                           | 89 (4)                                                       |                  |
| Sites                                                           |                                       |                                      |                                      | 0.31 |                           |                                                                       |                                                                        |                                                    |                                                              | 0.33             |
| Intermountain Healthcare                                        | 8993 (42)                             | 7600 (85)                            | 1393 (15)                            |      | 4612 (51)                 | 908 (10)                                                              | 557 (6)                                                                | 2700 (30)                                          | 216 (2)                                                      |                  |
| Kaiser Permanente Northwest                                     | 4682 (22)                             | 4277 (91)                            | 405 (9)                              |      | 2100 (45)                 | 440 (9)                                                               | 327 (7)                                                                | 1702 (36)                                          | 113 (2)                                                      |                  |
| Regenstrief Institute                                           | 7847 (36)                             | 6394 (81)                            | 1453 (19)                            |      | 5100 (65)                 | 572 (7)                                                               | 385 (5)                                                                | 1663 (21)                                          | 127 (2)                                                      |                  |
| Site-regions                                                    |                                       |                                      |                                      | 0.47 |                           |                                                                       |                                                                        |                                                    |                                                              | 0.40             |
| Intermountain Healthcare - site-region 1                        | 605 (3)                               | 522 (86)                             | 83 (14)                              |      | 278 (46)                  | 55 (9)                                                                | 35 (6)                                                                 | 225 (37)                                           | 12 (2)                                                       |                  |
| Intermountain Healthcare - site-region 2                        | 356 (2)                               | 278 (78)                             | 78 (22)                              |      | 180 (51)                  | 35 (10)                                                               | 22 (6)                                                                 | 116 (33)                                           | 3 (1)                                                        |                  |
| Intermountain Healthcare - site-region 3                        | 3266 (15)                             | 2864 (88)                            | 402 (12)                             |      | 1542 (47)                 | 351 (11)                                                              | 219 (7)                                                                | 1073 (33)                                          | 81 (2)                                                       |                  |
| Intermountain Healthcare - site-region 4                        | 1418 (7)                              | 1166 (82)                            | 252 (18)                             |      | 721 (51)                  | 129 (9)                                                               | 80 (6)                                                                 | 472 (33)                                           | 16 (1)                                                       |                  |
| Intermountain Healthcare - site-region 5                        | 310 (1)                               | 262 (85)                             | 48 (15)                              |      | 165 (53)                  | 31 (10)                                                               | 24 (8)                                                                 | 82 (26)                                            | 8 (3)                                                        |                  |
| Intermountain Healthcare - site-region 6                        | 1146 (5)                              | 983 (86)                             | 163 (14)                             |      | 623 (54)                  | 111 (10)                                                              | 72 (6)                                                                 | 307 (27)                                           | 33 (3)                                                       |                  |
| Intermountain Healthcare - site-region 7                        | 283 (1)                               | 241 (85)                             | 42 (15)                              |      | 159 (56)                  | 27 (10)                                                               | 15 (5)                                                                 | 77 (27)                                            | 5 (2)                                                        |                  |

|                                                   |            |            |           |           |          |          |           |         |      |
|---------------------------------------------------|------------|------------|-----------|-----------|----------|----------|-----------|---------|------|
| Intermountain Healthcare - site-region 8          | 1609 (7)   | 1284 (80)  | 325 (20)  | 944 (59)  | 169 (11) | 90 (6)   | 348 (22)  | 58 (4)  |      |
| Kaiser Permanente Northwest - site-region 1       | 2197 (10)  | 2004 (91)  | 193 (9)   | 915 (42)  | 232 (11) | 147 (7)  | 828 (38)  | 75 (3)  |      |
| Kaiser Permanente Northwest - site-region 2       | 1939 (9)   | 1794 (93)  | 145 (7)   | 916 (47)  | 155 (8)  | 144 (7)  | 697 (36)  | 27 (1)  |      |
| Kaiser Permanente Northwest - site-region 3       | 546 (3)    | 479 (88)   | 67 (12)   | 269 (49)  | 53 (10)  | 36 (7)   | 177 (32)  | 11 (2)  |      |
| Regenstrief Institute - site-region 1             | 894 (4)    | 705 (79)   | 189 (21)  | 658 (74)  | 58 (6)   | 40 (4)   | 129 (14)  | 9 (1)   |      |
| Regenstrief Institute - site-region 2             | 518 (2)    | 420 (81)   | 98 (19)   | 316 (61)  | 23 (4)   | 17 (3)   | 148 (29)  | 14 (3)  |      |
| Regenstrief Institute - site-region 3             | 291 (1)    | 156 (54)   | 135 (46)  | 216 (74)  | 27 (9)   | 16 (5)   | 30 (10)   | 2 (1)   |      |
| Regenstrief Institute - site-region 4             | 884 (4)    | 695 (79)   | 189 (21)  | 574 (65)  | 65 (7)   | 47 (5)   | 184 (21)  | 14 (2)  |      |
| Regenstrief Institute - site-region 5             | 2339 (11)  | 1968 (84)  | 371 (16)  | 1455 (62) | 180 (8)  | 136 (6)  | 528 (23)  | 40 (2)  |      |
| Regenstrief Institute - site-region 6             | 639 (3)    | 530 (83)   | 109 (17)  | 445 (70)  | 49 (8)   | 30 (5)   | 107 (17)  | 8 (1)   |      |
| Regenstrief Institute - site-region 7             | 176 (1)    | 153 (87)   | 23 (13)   | 119 (68)  | 12 (7)   | 7 (4)    | 35 (20)   | 3 (2)   |      |
| Regenstrief Institute - site-region 8             | 711 (3)    | 581 (82)   | 130 (18)  | 477 (67)  | 45 (6)   | 27 (4)   | 151 (21)  | 11 (2)  |      |
| Regenstrief Institute - site-region 9             | 398 (2)    | 344 (86)   | 54 (14)   | 233 (59)  | 37 (9)   | 20 (5)   | 101 (25)  | 7 (2)   |      |
| Regenstrief Institute - site-region 10            | 191 (1)    | 179 (94)   | 12 (6)    | 112 (59)  | 14 (7)   | 13 (7)   | 52 (27)   | 0 (0)   |      |
| Regenstrief Institute - site-region missing       | 806 (4)    | 663 (82)   | 143 (18)  | 495 (61)  | 62 (8)   | 32 (4)   | 198 (25)  | 19 (2)  |      |
| Age groups                                        |            |            |           | 0.35      |          |          |           |         | 0.41 |
| 50-64 years                                       | 7352 (34)  | 5819 (79)  | 1533 (21) | 4908 (67) | 547 (7)  | 325 (4)  | 1336 (18) | 236 (3) |      |
| 65-74 years                                       | 6569 (31)  | 5616 (85)  | 953 (15)  | 3518 (54) | 611 (9)  | 403 (6)  | 1915 (29) | 122 (2) |      |
| 75-84 years                                       | 5235 (24)  | 4656 (89)  | 579 (11)  | 2359 (45) | 539 (10) | 369 (7)  | 1893 (36) | 75 (1)  |      |
| ≥85 years                                         | 2366 (11)  | 2180 (92)  | 186 (8)   | 1027 (43) | 223 (9)  | 172 (7)  | 921 (39)  | 23 (1)  |      |
| Race (regardless of ethnicity)                    |            |            |           | 0.18      |          |          |           |         | 0.22 |
| White                                             | 17564 (82) | 15089 (86) | 2475 (14) | 9334 (53) | 1599 (9) | 1076 (6) | 5182 (30) | 373 (2) |      |
| Black                                             | 832 (4)    | 655 (79)   | 177 (21)  | 604 (73)  | 55 (7)   | 25 (3)   | 134 (16)  | 14 (2)  |      |
| Other <sup>6</sup>                                | 741 (3)    | 625 (84)   | 116 (16)  | 391 (53)  | 87 (12)  | 54 (7)   | 192 (26)  | 17 (2)  |      |
| Unknown                                           | 2385 (11)  | 1902 (80)  | 483 (20)  | 1483 (62) | 179 (8)  | 114 (5)  | 557 (23)  | 52 (2)  |      |
| Ethnicity (regardless of race)                    |            |            |           | 0.19      |          |          |           |         | 0.14 |
| Hispanic                                          | 1170 (5)   | 877 (75)   | 293 (25)  | 725 (62)  | 102 (9)  | 65 (6)   | 250 (21)  | 28 (2)  |      |
| Non-Hispanic                                      | 18142 (84) | 15606 (86) | 2536 (14) | 9718 (54) | 1666 (9) | 1105 (6) | 5273 (29) | 380 (2) |      |
| Unknown                                           | 2210 (10)  | 1788 (81)  | 422 (19)  | 1369 (62) | 152 (7)  | 99 (4)   | 542 (25)  | 48 (2)  |      |
| Underlying respiratory condition at discharge     |            |            |           | -0.26     |          |          |           |         | 0.09 |
| Chronic respiratory condition <sup>7</sup>        | 7383 (34)  | 6598 (89)  | 785 (11)  | 3832 (52) | 703 (10) | 463 (6)  | 2206 (30) | 179 (2) |      |
| None                                              | 14139 (66) | 11673 (83) | 2466 (17) | 7980 (56) | 1217 (9) | 806 (6)  | 3859 (27) | 277 (2) |      |
| Underlying non-respiratory condition at discharge |            |            |           | -0.30     |          |          |           |         | 0.18 |
| Chronic non-respiratory condition <sup>8</sup>    | 12663 (59) | 11157 (88) | 1506 (12) | 6483 (51) | 1179 (9) | 796 (6)  | 3947 (31) | 258 (2) |      |



|                                                                |            |           |           |      |             |           |          |           |           |       |
|----------------------------------------------------------------|------------|-----------|-----------|------|-------------|-----------|----------|-----------|-----------|-------|
| None                                                           | 8859 (41)  | 7114 (80) | 1745 (20) |      | 5329 (60)   | 741 (8)   | 473 (5)  | 2118 (24) | 198 (2)   |       |
| COVID-19-like illness (CLI) ICD discharge codes                |            |           |           | 0.99 |             |           |          |           |           | -0.15 |
| ≥1 CLI clinical diagnosis code <sup>9</sup>                    | 11631 (54) | 8740 (75) | 2891 (25) |      | 6785 (58)   | 992 (9)   | 606 (5)  | 2992 (26) | 256 (2)   |       |
| No clinical diagnosis but ≥1 CLI sign or symptom <sup>10</sup> | 9891 (46)  | 9531 (96) | 360 (4)   |      | 5027 (51)   | 928 (9)   | 663 (7)  | 3073 (31) | 200 (2)   |       |
| CLI diagnosis and placement among discharge codes              |            |           |           | 0.78 |             |           |          |           |           | -0.26 |
| CLI is first or primary diagnosis                              | 11290 (52) | 8622 (76) | 2668 (24) |      | 6885 (61)   | 944 (8)   | 599 (5)  | 2619 (23) | 243 (2)   |       |
| CLI is not first or primary diagnosis                          | 10232 (48) | 9649 (94) | 583 (6)   |      | 4927 (48)   | 976 (10)  | 670 (7)  | 3446 (34) | 213 (2)   |       |
| COVID-19 Vaccinations                                          |            |           |           | 0.93 |             |           |          |           |           |       |
| Unvaccinated                                                   | 11812 (55) | 8965 (76) | 2847 (24) |      | 11812 (100) | 0 (0)     | 0 (0)    | 0 (0)     | 0 (0)     |       |
| BNT162b2 (Pfizer-BioNTech)                                     | 5212 (24)  | 4988 (96) | 224 (4)   |      | 0 (0)       | 912 (17)  | 711 (14) | 3589 (69) | 0 (0)     |       |
| mRNA-1273 (Moderna)                                            | 4042 (19)  | 3891 (96) | 151 (4)   |      | 0 (0)       | 1008 (25) | 558 (14) | 2476 (61) | 0 (0)     |       |
| Ad26.COV2.S (Johnson & Johnson)                                | 456 (2)    | 427 (94)  | 29 (6)    |      | 0 (0)       | 0 (0)     | 0 (0)    | 0 (0)     | 456 (100) |       |

**Table S14 Characteristics of Sample – Positives Only - Hospitalizations**

|                                                  | <b>Total SARS-CoV-2<br/>Positives</b><br>N (Col. %) | <b>Unvaccinated</b><br>N (Row %) | <b>Partially mRNA<br/>Vaccinated<br/>(1 dose)<sup>1</sup></b><br>N (Row %) | <b>Partially mRNA<br/>Vaccinated<br/>(2 doses)<sup>2</sup></b><br>N (Row %) | <b>Fully mRNA<br/>Vaccinated<sup>3</sup></b><br>N (Row %) | <b>Fully Ad26.COVS.S<br/>Vaccinated<sup>3</sup></b><br>N (Row %) | <b>SMD<sup>4</sup></b> |
|--------------------------------------------------|-----------------------------------------------------|----------------------------------|----------------------------------------------------------------------------|-----------------------------------------------------------------------------|-----------------------------------------------------------|------------------------------------------------------------------|------------------------|
| <b>A. Hospitalizations</b>                       |                                                     |                                  |                                                                            |                                                                             |                                                           |                                                                  |                        |
| All hospitalizations                             | 4321 (100)                                          | 3695 (86)                        | 231 (5)                                                                    | 107 (2)                                                                     | 258 (6)                                                   | 30 (1)                                                           |                        |
| Events per person                                |                                                     |                                  |                                                                            |                                                                             |                                                           |                                                                  | 0.10                   |
| First hospitalization per person                 | 4271 (99)                                           | 3662 (86)                        | 225 (5)                                                                    | 105 (2)                                                                     | 251 (6)                                                   | 28 (1)                                                           |                        |
| Repeat hospitalization per person                | 50 (1)                                              | 33 (66)                          | 6 (12)                                                                     | 2 (4)                                                                       | 7 (14)                                                    | 2 (4)                                                            |                        |
| Month of hospitalization index date <sup>5</sup> |                                                     |                                  |                                                                            |                                                                             |                                                           |                                                                  | 0.35                   |
| January                                          | 297 (7)                                             | 286 (96)                         | 10 (3)                                                                     | 1 (0)                                                                       | 0 (0)                                                     | 0 (0)                                                            |                        |
| February                                         | 666 (15)                                            | 584 (88)                         | 56 (8)                                                                     | 22 (3)                                                                      | 4 (1)                                                     | 0 (0)                                                            |                        |
| March                                            | 789 (18)                                            | 632 (80)                         | 85 (11)                                                                    | 38 (5)                                                                      | 33 (4)                                                    | 1 (0)                                                            |                        |
| April                                            | 1270 (29)                                           | 1086 (86)                        | 56 (4)                                                                     | 35 (3)                                                                      | 81 (6)                                                    | 12 (1)                                                           |                        |
| May                                              | 1100 (25)                                           | 948 (86)                         | 22 (2)                                                                     | 10 (1)                                                                      | 107 (10)                                                  | 13 (1)                                                           |                        |
| June                                             | 199 (5)                                             | 159 (80)                         | 2 (1)                                                                      | 1 (1)                                                                       | 33 (17)                                                   | 4 (2)                                                            |                        |
| Sites                                            |                                                     |                                  |                                                                            |                                                                             |                                                           |                                                                  | 0.50                   |
| Columbia University                              | 668 (15)                                            | 595 (89)                         | 39 (6)                                                                     | 13 (2)                                                                      | 20 (3)                                                    | 1 (0)                                                            |                        |
| HealthPartners                                   | 61 (1)                                              | 47 (77)                          | 8 (13)                                                                     | 1 (2)                                                                       | 5 (8)                                                     | 0 (0)                                                            |                        |
| Intermountain Healthcare                         | 557 (13)                                            | 471 (85)                         | 31 (6)                                                                     | 16 (3)                                                                      | 35 (6)                                                    | 4 (1)                                                            |                        |
| Kaiser Permanente Northern California            | 665 (15)                                            | 488 (73)                         | 47 (7)                                                                     | 24 (4)                                                                      | 96 (14)                                                   | 2 (0)                                                            |                        |
| Kaiser Permanente Northwest                      | 118 (3)                                             | 98 (83)                          | 10 (8)                                                                     | 4 (3)                                                                       | 4 (3)                                                     | 2 (2)                                                            |                        |
| Regenstrief Institute                            | 1661 (38)                                           | 1437 (87)                        | 86 (5)                                                                     | 40 (2)                                                                      | 85 (5)                                                    | 13 (1)                                                           |                        |
| University of Colorado                           | 591 (14)                                            | 559 (95)                         | 10 (2)                                                                     | 9 (2)                                                                       | 13 (2)                                                    | 0 (0)                                                            |                        |
| Site-regions                                     |                                                     |                                  |                                                                            |                                                                             |                                                           |                                                                  | 0.58                   |
| Columbia University - site-region 1              | 668 (15)                                            | 595 (89)                         | 39 (6)                                                                     | 13 (2)                                                                      | 20 (3)                                                    | 1 (0)                                                            |                        |
| HealthPartners - site-region 1                   | 57 (1)                                              | 44 (77)                          | 7 (12)                                                                     | 1 (2)                                                                       | 5 (9)                                                     | 0 (0)                                                            |                        |
| HealthPartners - site-region 2                   | 4 (0)                                               | 3 (75)                           | 1 (25)                                                                     | 0 (0)                                                                       | 0 (0)                                                     | 0 (0)                                                            |                        |
| Intermountain Healthcare - site-region 1         | 29 (1)                                              | 26 (90)                          | 1 (3)                                                                      | 1 (3)                                                                       | 0 (0)                                                     | 1 (3)                                                            |                        |
| Intermountain Healthcare - site-region 2         | 34 (1)                                              | 30 (88)                          | 1 (3)                                                                      | 0 (0)                                                                       | 3 (9)                                                     | 0 (0)                                                            |                        |
| Intermountain Healthcare - site-region 3         | 181 (4)                                             | 146 (81)                         | 15 (8)                                                                     | 4 (2)                                                                       | 14 (8)                                                    | 2 (1)                                                            |                        |
| Intermountain Healthcare - site-region 4         | 91 (2)                                              | 75 (82)                          | 4 (4)                                                                      | 3 (3)                                                                       | 9 (10)                                                    | 0 (0)                                                            |                        |
| Intermountain Healthcare - site-region 5         | 9 (0)                                               | 8 (89)                           | 0 (0)                                                                      | 1 (11)                                                                      | 0 (0)                                                     | 0 (0)                                                            |                        |

|                                                       |           |           |         |        |         |        |
|-------------------------------------------------------|-----------|-----------|---------|--------|---------|--------|
| Intermountain Healthcare - site-region 6              | 68 (2)    | 56 (82)   | 3 (4)   | 4 (6)  | 5 (7)   | 0 (0)  |
| Intermountain Healthcare - site-region 7              | 13 (0)    | 11 (85)   | 0 (0)   | 1 (8)  | 1 (8)   | 0 (0)  |
| Intermountain Healthcare - site-region 8              | 132 (3)   | 119 (90)  | 7 (5)   | 2 (2)  | 3 (2)   | 1 (1)  |
| Kaiser Permanente Northern California - site-region 1 | 54 (1)    | 35 (65)   | 7 (13)  | 3 (6)  | 8 (15)  | 1 (2)  |
| Kaiser Permanente Northern California - site-region 2 | 57 (1)    | 46 (81)   | 5 (9)   | 3 (5)  | 3 (5)   | 0 (0)  |
| Kaiser Permanente Northern California - site-region 3 | 219 (5)   | 174 (79)  | 13 (6)  | 9 (4)  | 22 (10) | 1 (0)  |
| Kaiser Permanente Northern California - site-region 4 | 182 (4)   | 127 (70)  | 14 (8)  | 5 (3)  | 32 (18) | 4 (2)  |
| Kaiser Permanente Northern California - site-region 5 | 55 (1)    | 35 (64)   | 3 (5)   | 2 (4)  | 14 (25) | 1 (2)  |
| Kaiser Permanente Northern California - site-region 6 | 13 (0)    | 8 (62)    | 2 (15)  | 0 (0)  | 3 (23)  | 0 (0)  |
| Kaiser Permanente Northern California - site-region 7 | 24 (1)    | 16 (67)   | 2 (8)   | 1 (4)  | 4 (17)  | 1 (4)  |
| Kaiser Permanente Northern California - site-region 8 | 61 (1)    | 47 (77)   | 1 (2)   | 1 (2)  | 10 (16) | 2 (3)  |
| Kaiser Permanente Northwest - site-region 1           | 75 (2)    | 64 (85)   | 7 (9)   | 2 (3)  | 1 (1)   | 1 (1)  |
| Kaiser Permanente Northwest - site-region 2           | 32 (1)    | 25 (78)   | 3 (9)   | 1 (3)  | 2 (6)   | 1 (3)  |
| Kaiser Permanente Northwest - site-region 3           | 11 (0)    | 9 (82)    | 0 (0)   | 1 (9)  | 1 (9)   | 0 (0)  |
| Regenstrief Institute - site-region 1                 | 411 (10)  | 370 (90)  | 22 (5)  | 7 (2)  | 12 (3)  | 0 (0)  |
| Regenstrief Institute - site-region 2                 | 107 (2)   | 87 (81)   | 11 (10) | 2 (2)  | 5 (5)   | 2 (2)  |
| Regenstrief Institute - site-region 3                 | 48 (1)    | 43 (90)   | 3 (6)   | 0 (0)  | 2 (4)   | 0 (0)  |
| Regenstrief Institute - site-region 4                 | 155 (4)   | 139 (90)  | 5 (3)   | 3 (2)  | 7 (5)   | 1 (1)  |
| Regenstrief Institute - site-region 5                 | 420 (10)  | 366 (87)  | 14 (3)  | 11 (3) | 23 (5)  | 6 (1)  |
| Regenstrief Institute - site-region 6                 | 160 (4)   | 133 (83)  | 8 (5)   | 5 (3)  | 13 (8)  | 1 (1)  |
| Regenstrief Institute - site-region 7                 | 6 (0)     | 6 (100)   | 0 (0)   | 0 (0)  | 0 (0)   | 0 (0)  |
| Regenstrief Institute - site-region 8                 | 121 (3)   | 102 (84)  | 8 (7)   | 4 (3)  | 6 (5)   | 1 (1)  |
| Regenstrief Institute - site-region 9                 | 67 (2)    | 51 (76)   | 9 (13)  | 1 (1)  | 6 (9)   | 0 (0)  |
| Regenstrief Institute - site-region 10                | 15 (0)    | 13 (87)   | 1 (7)   | 1 (7)  | 0 (0)   | 0 (0)  |
| Regenstrief Institute - site-region missing           | 151 (3)   | 127 (84)  | 5 (3)   | 6 (4)  | 11 (7)  | 2 (1)  |
| University of Colorado - site-region 1                | 172 (4)   | 157 (91)  | 3 (2)   | 3 (2)  | 9 (5)   | 0 (0)  |
| University of Colorado - site-region 2                | 208 (5)   | 196 (94)  | 6 (3)   | 3 (1)  | 3 (1)   | 0 (0)  |
| University of Colorado - site-region 3                | 211 (5)   | 206 (98)  | 1 (0)   | 3 (1)  | 1 (0)   | 0 (0)  |
| Age groups                                            |           |           |         |        |         | 0.44   |
| 50-64 years                                           | 1328 (31) | 1219 (92) | 41 (3)  | 20 (2) | 33 (2)  | 15 (1) |
| 65-74 years                                           | 1319 (31) | 1142 (87) | 75 (6)  | 26 (2) | 68 (5)  | 8 (1)  |
| 75-84 years                                           | 1089 (25) | 887 (81)  | 74 (7)  | 34 (3) | 89 (8)  | 5 (0)  |
| ≥85 years                                             | 585 (14)  | 447 (76)  | 41 (7)  | 27 (5) | 68 (12) | 2 (0)  |
| Race (regardless of ethnicity)                        |           |           |         |        |         | 0.17   |
| White                                                 | 2662 (62) | 2255 (85) | 140 (5) | 73 (3) | 175 (7) | 19 (1) |
| Black                                                 | 488 (11)  | 436 (89)  | 21 (4)  | 7 (1)  | 20 (4)  | 4 (1)  |
| Other <sup>6</sup>                                    | 200 (5)   | 158 (79)  | 12 (6)  | 10 (5) | 19 (10) | 1 (1)  |

|                                                                      |           |            |          |         |          |          |       |
|----------------------------------------------------------------------|-----------|------------|----------|---------|----------|----------|-------|
| Unknown                                                              | 971 (22)  | 846 (87)   | 58 (6)   | 17 (2)  | 44 (5)   | 6 (1)    |       |
| Ethnicity (regardless of race)                                       |           |            |          |         |          |          | 0.09  |
| Hispanic                                                             | 749 (17)  | 656 (88)   | 36 (5)   | 16 (2)  | 35 (5)   | 6 (1)    |       |
| Non-Hispanic                                                         | 2879 (67) | 2460 (85)  | 144 (5)  | 77 (3)  | 179 (6)  | 19 (1)   |       |
| Unknown                                                              | 693 (16)  | 579 (84)   | 51 (7)   | 14 (2)  | 44 (6)   | 5 (1)    |       |
| Underlying respiratory condition at discharge                        |           |            |          |         |          |          | -0.08 |
| Chronic respiratory condition <sup>7</sup>                           | 2734 (63) | 2359 (86)  | 140 (5)  | 62 (2)  | 152 (6)  | 21 (1)   |       |
| None                                                                 | 1587 (37) | 1336 (84)  | 91 (6)   | 45 (3)  | 106 (7)  | 9 (1)    |       |
| Underlying non-respiratory condition at discharge                    |           |            |          |         |          |          | 0.24  |
| Chronic non-respiratory condition <sup>8</sup>                       | 3610 (84) | 3043 (84)  | 201 (6)  | 97 (3)  | 240 (7)  | 29 (1)   |       |
| None                                                                 | 711 (16)  | 652 (92)   | 30 (4)   | 10 (1)  | 18 (3)   | 1 (0)    |       |
| COVID-19-like illness (CLI) ICD discharge codes                      |           |            |          |         |          |          | -0.12 |
| $\geq 1$ CLI clinical diagnosis code <sup>9</sup>                    | 4235 (98) | 3632 (86)  | 222 (5)  | 104 (2) | 248 (6)  | 29 (1)   |       |
| No clinical diagnosis but $\geq 1$ CLI sign or symptom <sup>10</sup> | 86 (2)    | 63 (73)    | 9 (10)   | 3 (3)   | 10 (12)  | 1 (1)    |       |
| CLI diagnosis and placement among discharge codes                    |           |            |          |         |          |          | -0.35 |
| CLI is first or primary diagnosis                                    | 2694 (62) | 2395 (89)  | 121 (4)  | 57 (2)  | 108 (4)  | 13 (0)   |       |
| CLI is not first or primary diagnosis                                | 1627 (38) | 1300 (80)  | 110 (7)  | 50 (3)  | 150 (9)  | 17 (1)   |       |
| Intensive care unit (ICU) admissions                                 |           |            |          |         |          |          | -0.09 |
| Admitted to ICU                                                      | 788 (18)  | 692 (88)   | 39 (5)   | 15 (2)  | 38 (5)   | 4 (1)    |       |
| Not in ICU during hospitalization                                    | 3533 (82) | 3003 (85)  | 192 (5)  | 92 (3)  | 220 (6)  | 26 (1)   |       |
| COVID-19 Vaccinations                                                |           |            |          |         |          |          |       |
| Unvaccinated                                                         | 3695 (86) | 3695 (100) | 0 (0)    | 0 (0)   | 0 (0)    | 0 (0)    |       |
| BNT162b2 (Pfizer-BioNTech)                                           | 360 (8)   | 0 (0)      | 140 (39) | 57 (16) | 163 (45) | 0 (0)    |       |
| mRNA-1273 (Moderna)                                                  | 236 (5)   | 0 (0)      | 91 (39)  | 50 (21) | 95 (40)  | 0 (0)    |       |
| Ad26.COV2.S (Johnson & Johnson)                                      | 30 (1)    | 0 (0)      | 0 (0)    | 0 (0)   | 0 (0)    | 30 (100) |       |

Note: All patients with indeterminate immunization status (receipt of dose-1 of mRNA vaccine 1-13 days prior to index test date) were excluded from table.

Abbreviations: Standard Mean Difference (SMD), COVID-like Illness (CLI), International Classification of Disease (ICD), Intensive Care Unit (ICU), Emergency Department (ED), Urgent Care (UC)

<sup>1</sup>Partially vaccinated with 1 dose: patients received dose-1 of mRNA vaccine  $\geq 14$  days prior to the index text date, had not received dose-2 by the index test date.

<sup>2</sup>Partially vaccinated with 2 doses: patients received dose-1 and dose-2 of mRNA vaccine, dose-2 receipt date 1-13 days prior to index date.

<sup>3</sup>Fully vaccinated: patients received single dose of J&J vaccine, dose-1 and dose-2 of mRNA vaccine, dose-2 of mRNA vaccine  $\geq$  14 days prior to the index text date.

<sup>4</sup>Standard Mean Difference (SMD) calculation compares unvaccinated to any receipt of vaccine (partial dose-1, partial dose-2 and full vaccination).

<sup>5</sup>Index date for each medical encounter was defined as the date of respiratory specimen collection associated with the most recent positive or negative SARS-CoV-2 test result prior to the medical encounter or the date of the medical encounter if testing only occurred after the admission or encounter date.

<sup>6</sup>Other race include Asian, Hawaiian or Other Pacific islander, American Indian or Alaskan Native, Other not-listed and multi-race.

<sup>7</sup>Underlying chronic respiratory conditions include asthma, chronic obstructive pulmonary disease (COPD), other lung disease.

<sup>8</sup>Underlying chronic non-respiratory conditions include heart failure, ischemic heart disease, hypertension, other heart disease, stroke, other cerebrovascular disease, diabetes (type 1, 2 and due to other specified conditions), other metabolic disease, clinical obesity, clinically underweight, renal disease, liver disease, blood disorder, other immunosuppressive conditions, organ transplant recipient, cancer, dementia, neurological/musculoskeletal disorder or Down's syndrome.

<sup>9</sup>CLI clinical discharge diagnosis codes include: COVID-19 U codes, COVID-19 pneumonia, influenza pneumonia, other viral pneumonia, pneumonia and influenza (bacterial and other) influenza disease, acute respiratory distress syndrome (ARDS), COPD exacerbation, asthma exacerbation, respiratory failure, other acute lower respiratory tract infection, sinusitis, acute upper respiratory tract infection.

<sup>10</sup>CLI signs and symptoms include: hemoptysis, cough, dyspnea unspecified, chest pain or breathing/painful respiration, asphyxia, hypoxemia, pleurisy, respiratory arrest, abnormal sputum, other specified symptoms and signs involving the circulatory and respiratory systems, fever, chills (without fever), diarrhea, disturbance of taste or smell, headache, myalgia, sepsis, other malaise, other fatigue, shock (unspecified), debility (unspecified), altered level of consciousness/mental state, weakness, nausea and vomiting, rash or other nonspecific skin eruption, abdominal pain

Table S15. Characteristics of Sample – Positives Only - ED/UC

|                                                                     | Total SARS-CoV-2<br>Positives<br>N (Col. %) | Unvaccinated<br>N (Row %) | Partially mRNA<br>Vaccinated<br>(1 dose) <sup>1</sup><br>N (Row %) | Partially mRNA<br>Vaccinated<br>(2 doses) <sup>2</sup><br>N (Row %) | Fully mRNA<br>Vaccinated <sup>3</sup><br>N (Row %) | Fully Ad26.COVS.S<br>Vaccinated <sup>3</sup><br>N (Row %) | SMD <sup>4</sup> |
|---------------------------------------------------------------------|---------------------------------------------|---------------------------|--------------------------------------------------------------------|---------------------------------------------------------------------|----------------------------------------------------|-----------------------------------------------------------|------------------|
| <b>B. Emergency Department (ED) and Urgent<br/>Care (UC) Visits</b> |                                             |                           |                                                                    |                                                                     |                                                    |                                                           |                  |
| All ED and UC Visits                                                | 3251 (100)                                  | 2847 (88)                 | 155 (5)                                                            | 66 (2)                                                              | 154 (5)                                            | 29 (1)                                                    |                  |
| Events per person                                                   |                                             |                           |                                                                    |                                                                     |                                                    |                                                           | -0.03            |
| First ED/UC event per person                                        | 2715 (84)                                   | 2374 (87)                 | 135 (5)                                                            | 57 (2)                                                              | 125 (5)                                            | 24 (1)                                                    |                  |
| Repeat ED/UC event per person                                       | 536 (16)                                    | 473 (88)                  | 20 (4)                                                             | 9 (2)                                                               | 29 (5)                                             | 5 (1)                                                     |                  |
| By medical event setting                                            |                                             |                           |                                                                    |                                                                     |                                                    |                                                           | 0.15             |
| ED visits                                                           | 2777 (85)                                   | 2451 (88)                 | 128 (5)                                                            | 55 (2)                                                              | 120 (4)                                            | 23 (1)                                                    |                  |
| UC visits                                                           | 474 (15)                                    | 396 (84)                  | 27 (6)                                                             | 11 (2)                                                              | 34 (7)                                             | 6 (1)                                                     |                  |
| Month of ED/UC event <sup>5</sup>                                   |                                             |                           |                                                                    |                                                                     |                                                    |                                                           | 0.29             |
| January                                                             | 116 (4)                                     | 112 (97)                  | 4 (3)                                                              | 0 (0)                                                               | 0 (0)                                              | 0 (0)                                                     |                  |
| February                                                            | 397 (12)                                    | 344 (87)                  | 32 (8)                                                             | 15 (4)                                                              | 6 (2)                                              | 0 (0)                                                     |                  |
| March                                                               | 561 (17)                                    | 473 (84)                  | 48 (9)                                                             | 19 (3)                                                              | 19 (3)                                             | 2 (0)                                                     |                  |
| April                                                               | 917 (28)                                    | 803 (88)                  | 47 (5)                                                             | 21 (2)                                                              | 37 (4)                                             | 9 (1)                                                     |                  |
| May                                                                 | 927 (29)                                    | 839 (91)                  | 21 (2)                                                             | 4 (0)                                                               | 52 (6)                                             | 11 (1)                                                    |                  |
| June                                                                | 333 (10)                                    | 276 (83)                  | 3 (1)                                                              | 7 (2)                                                               | 40 (12)                                            | 7 (2)                                                     |                  |
| Sites                                                               |                                             |                           |                                                                    |                                                                     |                                                    |                                                           | 0.19             |
| Intermountain Healthcare                                            | 1393 (43)                                   | 1193 (86)                 | 66 (5)                                                             | 31 (2)                                                              | 90 (6)                                             | 13 (1)                                                    |                  |
| Kaiser Permanente Northwest                                         | 405 (12)                                    | 354 (87)                  | 21 (5)                                                             | 10 (2)                                                              | 16 (4)                                             | 4 (1)                                                     |                  |
| Regenstrief Institute                                               | 1453 (45)                                   | 1300 (89)                 | 68 (5)                                                             | 25 (2)                                                              | 48 (3)                                             | 12 (1)                                                    |                  |
| Site-regions                                                        |                                             |                           |                                                                    |                                                                     |                                                    |                                                           | 0.35             |
| Intermountain Healthcare - site-region 1                            | 83 (3)                                      | 76 (92)                   | 3 (4)                                                              | 0 (0)                                                               | 4 (5)                                              | 0 (0)                                                     |                  |
| Intermountain Healthcare - site-region 2                            | 78 (2)                                      | 57 (73)                   | 6 (8)                                                              | 3 (4)                                                               | 12 (15)                                            | 0 (0)                                                     |                  |
| Intermountain Healthcare - site-region 3                            | 402 (12)                                    | 334 (83)                  | 23 (6)                                                             | 8 (2)                                                               | 28 (7)                                             | 9 (2)                                                     |                  |
| Intermountain Healthcare - site-region 4                            | 252 (8)                                     | 215 (85)                  | 11 (4)                                                             | 7 (3)                                                               | 19 (8)                                             | 0 (0)                                                     |                  |

|                                               |           |           |         |        |         |        |      |
|-----------------------------------------------|-----------|-----------|---------|--------|---------|--------|------|
| Intermountain Healthcare - site-region 5      | 48 (1)    | 44 (92)   | 1 (2)   | 2 (4)  | 1 (2)   | 0 (0)  |      |
| Intermountain Healthcare - site-region 6      | 163 (5)   | 133 (82)  | 7 (4)   | 7 (4)  | 15 (9)  | 1 (1)  |      |
| Intermountain Healthcare - site-region 7      | 42 (1)    | 39 (93)   | 0 (0)   | 1 (2)  | 2 (5)   | 0 (0)  |      |
| Intermountain Healthcare - site-region 8      | 325 (10)  | 295 (91)  | 15 (5)  | 3 (1)  | 9 (3)   | 3 (1)  |      |
| Kaiser Permanente Northwest - site-region 1   | 193 (6)   | 169 (88)  | 13 (7)  | 4 (2)  | 6 (3)   | 1 (1)  |      |
| Kaiser Permanente Northwest - site-region 2   | 145 (4)   | 126 (87)  | 7 (5)   | 3 (2)  | 8 (6)   | 1 (1)  |      |
| Kaiser Permanente Northwest - site-region 3   | 67 (2)    | 59 (88)   | 1 (1)   | 3 (4)  | 2 (3)   | 2 (3)  |      |
| Regenstrief Institute - site-region 1         | 189 (6)   | 169 (89)  | 10 (5)  | 4 (2)  | 5 (3)   | 1 (1)  |      |
| Regenstrief Institute - site-region 2         | 98 (3)    | 88 (90)   | 4 (4)   | 2 (2)  | 2 (2)   | 2 (2)  |      |
| Regenstrief Institute - site-region 3         | 135 (4)   | 116 (86)  | 12 (9)  | 3 (2)  | 4 (3)   | 0 (0)  |      |
| Regenstrief Institute - site-region 4         | 189 (6)   | 167 (88)  | 7 (4)   | 3 (2)  | 9 (5)   | 3 (2)  |      |
| Regenstrief Institute - site-region 5         | 371 (11)  | 339 (91)  | 15 (4)  | 9 (2)  | 6 (2)   | 2 (1)  |      |
| Regenstrief Institute - site-region 6         | 109 (3)   | 102 (94)  | 3 (3)   | 1 (1)  | 3 (3)   | 0 (0)  |      |
| Regenstrief Institute - site-region 7         | 23 (1)    | 19 (83)   | 3 (13)  | 1 (4)  | 0 (0)   | 0 (0)  |      |
| Regenstrief Institute - site-region 8         | 130 (4)   | 113 (87)  | 5 (4)   | 1 (1)  | 9 (7)   | 2 (2)  |      |
| Regenstrief Institute - site-region 9         | 54 (2)    | 47 (87)   | 5 (9)   | 0 (0)  | 1 (2)   | 1 (2)  |      |
| Regenstrief Institute - site-region 10        | 12 (0)    | 11 (92)   | 0 (0)   | 0 (0)  | 1 (8)   | 0 (0)  |      |
| Regenstrief Institute - site-region missing   | 143 (4)   | 129 (90)  | 4 (3)   | 1 (1)  | 8 (6)   | 1 (1)  |      |
| Age groups                                    |           |           |         |        |         |        | 0.50 |
| 50-64 years                                   | 1533 (47) | 1416 (92) | 50 (3)  | 13 (1) | 35 (2)  | 19 (1) |      |
| 65-74 years                                   | 953 (29)  | 829 (87)  | 47 (5)  | 22 (2) | 48 (5)  | 7 (1)  |      |
| 75-84 years                                   | 579 (18)  | 459 (79)  | 45 (8)  | 21 (4) | 51 (9)  | 3 (1)  |      |
| ≥85 years                                     | 186 (6)   | 143 (77)  | 13 (7)  | 10 (5) | 20 (11) | 0 (0)  |      |
| Race (regardless of ethnicity)                |           |           |         |        |         |        | 0.15 |
| White                                         | 2475 (76) | 2158 (87) | 114 (5) | 53 (2) | 128 (5) | 22 (1) |      |
| Black                                         | 177 (5)   | 166 (94)  | 7 (4)   | 1 (1)  | 3 (2)   | 0 (0)  |      |
| Other <sup>6</sup>                            | 116 (4)   | 99 (85)   | 7 (6)   | 5 (4)  | 4 (3)   | 1 (1)  |      |
| Unknown                                       | 483 (15)  | 424 (88)  | 27 (6)  | 7 (1)  | 19 (4)  | 6 (1)  |      |
| Ethnicity (regardless of race)                |           |           |         |        |         |        | 0.07 |
| Hispanic                                      | 293 (9)   | 248 (85)  | 14 (5)  | 5 (2)  | 23 (8)  | 3 (1)  |      |
| Non-Hispanic                                  | 2536 (78) | 2224 (88) | 120 (5) | 53 (2) | 118 (5) | 21 (1) |      |
| Unknown                                       | 422 (13)  | 375 (89)  | 21 (5)  | 8 (2)  | 13 (3)  | 5 (1)  |      |
| Underlying respiratory condition at discharge |           |           |         |        |         |        | 0.07 |
| Chronic respiratory condition <sup>7</sup>    | 785 (24)  | 677 (86)  | 36 (5)  | 20 (3) | 44 (6)  | 8 (1)  |      |
| None                                          | 2466 (76) | 2170 (88) | 119 (5) | 46 (2) | 110 (4) | 21 (1) |      |

|                                                                |           |            |         |         |          |          |  |       |
|----------------------------------------------------------------|-----------|------------|---------|---------|----------|----------|--|-------|
| Underlying non-respiratory condition at discharge              |           |            |         |         |          |          |  | 0.15  |
| Chronic non-respiratory condition <sup>8</sup>                 | 1506 (46) | 1293 (86)  | 67 (4)  | 33 (2)  | 98 (7)   | 15 (1)   |  |       |
| None                                                           | 1745 (54) | 1554 (89)  | 88 (5)  | 33 (2)  | 56 (3)   | 14 (1)   |  |       |
| COVID-19-like illness (CLI) ICD discharge codes                |           |            |         |         |          |          |  | -0.08 |
| ≥1 CLI clinical diagnosis code <sup>9</sup>                    | 2891 (89) | 2541 (88)  | 136 (5) | 54 (2)  | 135 (5)  | 25 (1)   |  |       |
| No clinical diagnosis but ≥1 CLI sign or symptom <sup>10</sup> | 360 (11)  | 306 (85)   | 19 (5)  | 12 (3)  | 19 (5)   | 4 (1)    |  |       |
| CLI diagnosis and placement among discharge codes              |           |            |         |         |          |          |  | -0.20 |
| CLI is first or primary diagnosis                              | 2668 (82) | 2365 (89)  | 122 (5) | 46 (2)  | 109 (4)  | 26 (1)   |  |       |
| CLI is not first or primary diagnosis                          | 583 (18)  | 482 (83)   | 33 (6)  | 20 (3)  | 45 (8)   | 3 (1)    |  |       |
| COVID-19 Vaccinations                                          |           |            |         |         |          |          |  |       |
| Unvaccinated                                                   | 2847 (88) | 2847 (100) | 0 (0)   | 0 (0)   | 0 (0)    | 0 (0)    |  |       |
| BNT162b2 (Pfizer-BioNTech)                                     | 224 (7)   | 0 (0)      | 88 (39) | 31 (14) | 105 (47) | 0 (0)    |  |       |
| mRNA-1273 (Moderna)                                            | 151 (5)   | 0 (0)      | 67 (44) | 35 (23) | 49 (32)  | 0 (0)    |  |       |
| Ad26.COV2.S (Johnson & Johnson)                                | 29 (1)    | 0 (0)      | 0 (0)   | 0 (0)   | 0 (0)    | 29 (100) |  |       |

Note: All patients with indeterminate immunization status (receipt of dose-1 of mRNA vaccine 1-13 days prior to index test date) were excluded from table.

Abbreviations: Standard Mean Difference (SMD), COVID-like Illness (CLI), International Classification of Disease (ICD), Intensive Care Unit (ICU), Emergency Department (ED), Urgent Care (UC)

<sup>1</sup>Partially vaccinated with 1 dose: patients received dose-1 of mRNA vaccine ≥ 14 days prior to the index text date, had not received dose-2 by the index test date.

<sup>2</sup>Partially vaccinated with 2 doses: patients received dose-1 and dose-2 of mRNA vaccine, dose-2 receipt date 1-13 days prior to index date.

<sup>3</sup>Fully vaccinated: patients received single dose of J&J vaccine, dose-1 and dose-2 of mRNA vaccine, dose-2 of mRNA vaccine ≥ 14 days prior to the index text date.

<sup>4</sup>Standard Mean Difference (SMD) calculation compares unvaccinated to any receipt of vaccine (partial dose-1, partial dose-2 and full vaccination).

<sup>5</sup>Index date for each medical encounter was defined as the date of respiratory specimen collection associated with the most recent positive or negative SARS-CoV-2 test result prior to the medical encounter or the date of the medical encounter if testing only occurred after the admission or encounter date.

<sup>6</sup>Other race include Asian, Hawaiian or Other Pacific islander, American Indian or Alaskan Native, Other not-listed and multi-race.

<sup>7</sup>Underlying chronic respiratory conditions include asthma, chronic obstructive pulmonary disease (COPD), other lung disease.

<sup>8</sup>Underlying chronic non-respiratory conditions include heart failure, ischemic heart disease, hypertension, other heart disease, stroke, other cerebrovascular disease, diabetes (type 1, 2 and due to other specified conditions), other metabolic disease, clinical obesity, clinically underweight, renal disease, liver disease, blood disorder, other immunosuppressive conditions, organ transplant recipient, cancer, dementia, neurological/musculoskeletal disorder or Down's syndrome.

<sup>9</sup>CLI clinical discharge diagnosis codes include: COVID-19 U codes, COVID-19 pneumonia, influenza pneumonia, other viral pneumonia, pneumonia and influenza (bacterial and other), influenza disease, acute respiratory distress syndrome (ARDS), COPD exacerbation, asthma exacerbation, respiratory failure, other acute lower respiratory tract infection, sinusitis, acute upper respiratory tract infection.

<sup>10</sup>CLI signs and symptoms include: hemoptysis, cough, dyspnea unspecified, chest pain or breathing/painful respiration, asphyxia, hypoxemia, pleurisy, respiratory arrest, abnormal sputum, other specified symptoms and signs involving the circulatory and respiratory systems, fever, chills (without fever), diarrhea, disturbance of taste or smell, headache, myalgia, sepsis, other malaise, other fatigue, shock (unspecified), debility (unspecified), altered level of consciousness/mental state, weakness, nausea and vomiting, rash or other nonspecific skin eruption, abdominal pain



**Table S16. Full listing of all estimates of messenger RNA (mRNA) vaccine effectiveness (VE) among COVID-19-associated hospitalizations and intensive care unit (ICU) admissions events**

|                                                                | Total | SARS-CoV-2<br>Positive | ( Row % ) | VE before Adjusted Model |             | VE <sup>1</sup> |             |
|----------------------------------------------------------------|-------|------------------------|-----------|--------------------------|-------------|-----------------|-------------|
|                                                                |       |                        |           | %                        | ( 95% CI )  | %               | ( 95% CI )  |
| <u>mRNA VE among COVID-19 hospitalizations</u>                 |       |                        |           |                          |             |                 |             |
| VE COVID-19 vaccines (aged ≥50 years)                          |       |                        |           |                          |             |                 |             |
| Unvaccinated (Referent)                                        | 20406 | 3695                   | ( 18.1 )  |                          |             |                 |             |
| Partially 1-Dose Vaccinated                                    | 3083  | 231                    | ( 7.5 )   | 63                       | ( 58 - 68 ) | 54              | ( 47 - 61 ) |
| Partially 2-Dose Vaccinated                                    | 2482  | 107                    | ( 4.3 )   | 80                       | ( 75 - 83 ) | 73              | ( 66 - 79 ) |
| Full 2-dose mRNA Vaccinated                                    | 14874 | 258                    | ( 1.7 )   | 92                       | ( 91 - 93 ) | 89              | ( 87 - 91 ) |
| <u>By mRNA vaccine product among COVID-19 hospitalizations</u> |       |                        |           |                          |             |                 |             |
| VE of BioNTech-Pfizer mRNA (aged ≥50 years)                    |       |                        |           |                          |             |                 |             |
| Unvaccinated (Referent)                                        | 20406 | 3695                   | ( 18.1 )  |                          |             |                 |             |
| Partially 1-Dose Vaccinated                                    | 1444  | 140                    | ( 9.7 )   | 51                       | ( 42 - 60 ) | 33              | ( 18 - 46 ) |
| Partially 2-Dose Vaccinated                                    | 1348  | 57                     | ( 4.2 )   | 80                       | ( 74 - 85 ) | 73              | ( 63 - 81 ) |
| Fully Vaccinated                                               | 8500  | 163                    | ( 1.9 )   | 91                       | ( 90 - 92 ) | 87              | ( 85 - 90 ) |
| VE of Moderna mRNA (aged ≥50 years)                            |       |                        |           |                          |             |                 |             |
| Unvaccinated (Referent)                                        | 20406 | 3695                   | ( 18.1 )  |                          |             |                 |             |
| Partially 1-Dose Vaccinated                                    | 1639  | 91                     | ( 5.6 )   | 73                       | ( 67 - 79 ) | 68              | ( 59 - 75 ) |
| Partially 2-Dose Vaccinated                                    | 1134  | 50                     | ( 4.4 )   | 79                       | ( 73 - 85 ) | 74              | ( 64 - 82 ) |
| Fully Vaccinated                                               | 6374  | 95                     | ( 1.5 )   | 93                       | ( 92 - 94 ) | 91              | ( 89 - 93 ) |
| Ad26.COV2.S (Johnson & Johnson)                                |       |                        |           |                          |             |                 |             |
| Unvaccinated (Referent)                                        | 10761 | 2006                   | ( 18.6 )  |                          |             |                 |             |
| Full 1-dose Vaccinated <sup>2</sup>                            | 707   | 30                     | ( 4.2 )   | 81                       | ( 73 - 87 ) | 68              | ( 50 - 79 ) |
| <u>By Age Group among COVID-19 hospitalizations</u>            |       |                        |           |                          |             |                 |             |
| VE mRNA vaccines (aged 50-64 years)                            |       |                        |           |                          |             |                 |             |
| Unvaccinated (Referent)                                        | 5532  | 1219                   | ( 22.0 )  |                          |             |                 |             |
| Partially 1-Dose Vaccinated                                    | 585   | 41                     | ( 7.0 )   | 73                       | ( 64 - 81 ) | 68              | ( 53 - 77 ) |
| Partially 2-Dose Vaccinated                                    | 467   | 20                     | ( 4.3 )   | 84                       | ( 76 - 90 ) | 82              | ( 70 - 89 ) |
| Fully Vaccinated                                               | 1898  | 33                     | ( 1.7 )   | 94                       | ( 91 - 96 ) | 93              | ( 89 - 95 ) |
| VE mRNA vaccines (aged 65-74 years)                            |       |                        |           |                          |             |                 |             |

|                                                                                                                                                          |       |      |          |    |             |    |             |  |  |
|----------------------------------------------------------------------------------------------------------------------------------------------------------|-------|------|----------|----|-------------|----|-------------|--|--|
| Unvaccinated (Referent)                                                                                                                                  | 6681  | 1142 | ( 17.1 ) |    |             |    |             |  |  |
| Partially 1-Dose Vaccinated                                                                                                                              | 1014  | 75   | ( 7.4 )  | 61 | ( 51 - 70 ) | 54 | ( 40 - 65 ) |  |  |
| Partially 2-Dose Vaccinated                                                                                                                              | 795   | 26   | ( 3.3 )  | 84 | ( 76 - 89 ) | 79 | ( 65 - 87 ) |  |  |
| Fully Vaccinated                                                                                                                                         | 4481  | 68   | ( 1.5 )  | 93 | ( 91 - 94 ) | 90 | ( 86 - 92 ) |  |  |
| VE mRNA vaccines (aged 75-84 years)                                                                                                                      |       |      |          |    |             |    |             |  |  |
| Unvaccinated (Referent)                                                                                                                                  | 5233  | 887  | ( 17.0 ) |    |             |    |             |  |  |
| Partially 1-Dose Vaccinated                                                                                                                              | 935   | 74   | ( 7.9 )  | 58 | ( 46 - 67 ) | 43 | ( 24 - 58 ) |  |  |
| Partially 2-Dose Vaccinated                                                                                                                              | 772   | 34   | ( 4.4 )  | 77 | ( 68 - 84 ) | 70 | ( 56 - 80 ) |  |  |
| Fully Vaccinated                                                                                                                                         | 5189  | 89   | ( 1.7 )  | 91 | ( 89 - 93 ) | 88 | ( 84 - 90 ) |  |  |
| VE mRNA vaccines (aged ≥85 years)                                                                                                                        |       |      |          |    |             |    |             |  |  |
| Unvaccinated (Referent)                                                                                                                                  | 2960  | 447  | ( 15.1 ) |    |             |    |             |  |  |
| Partially 1-Dose Vaccinated                                                                                                                              | 549   | 41   | ( 7.5 )  | 55 | ( 37 - 68 ) | 38 | ( 11 - 57 ) |  |  |
| Partially 2-Dose Vaccinated                                                                                                                              | 448   | 27   | ( 6.0 )  | 64 | ( 47 - 76 ) | 56 | ( 32 - 72 ) |  |  |
| Fully Vaccinated                                                                                                                                         | 3306  | 68   | ( 2.1 )  | 88 | ( 85 - 91 ) | 83 | ( 77 - 87 ) |  |  |
| <u>By Race (regardless of ethnicity) among COVID-19 hospitalizations</u>                                                                                 |       |      |          |    |             |    |             |  |  |
| VE mRNA vaccines among Black adults aged ≥50 years                                                                                                       |       |      |          |    |             |    |             |  |  |
| Unvaccinated (Referent)                                                                                                                                  | 2393  | 436  | ( 18.2 ) |    |             |    |             |  |  |
| Partially 1-Dose Vaccinated                                                                                                                              | 269   | 21   | ( 7.8 )  | 62 | ( 41 - 77 ) | 47 | ( 10 - 69 ) |  |  |
| Partially 2-Dose Vaccinated                                                                                                                              | 194   | 7    | ( 3.6 )  | 83 | ( 67 - 93 ) | 75 | ( 36 - 90 ) |  |  |
| Fully Vaccinated                                                                                                                                         | 961   | 20   | ( 2.1 )  | 90 | ( 85 - 94 ) | 86 | ( 75 - 92 ) |  |  |
| VE mRNA vaccines among white adults aged ≥50 years                                                                                                       |       |      |          |    |             |    |             |  |  |
| Unvaccinated (Referent)                                                                                                                                  | 13886 | 2255 | ( 16.2 ) |    |             |    |             |  |  |
| Partially 1-Dose Vaccinated                                                                                                                              | 2246  | 140  | ( 6.2 )  | 66 | ( 59 - 71 ) | 57 | ( 48 - 65 ) |  |  |
| Partially 2-Dose Vaccinated                                                                                                                              | 1779  | 73   | ( 4.1 )  | 78 | ( 72 - 83 ) | 71 | ( 61 - 78 ) |  |  |
| Fully Vaccinated                                                                                                                                         | 10655 | 175  | ( 1.6 )  | 91 | ( 90 - 93 ) | 90 | ( 88 - 91 ) |  |  |
| VE mRNA vaccines among other (Asian, Hawaiian or Other Pacific Islander, American Indian or Alaska Native, Multi-racial, or Other) adults aged ≥50 years |       |      |          |    |             |    |             |  |  |
| Unvaccinated (Referent)                                                                                                                                  | 913   | 158  | ( 17.3 ) |    |             |    |             |  |  |
| Partially 1-Dose Vaccinated                                                                                                                              | 183   | 12   | ( 6.6 )  | 66 | ( 41 - 83 ) | 57 | ( 9 - 79 )  |  |  |
| Partially 2-Dose Vaccinated                                                                                                                              | 223   | 10   | ( 4.5 )  | 78 | ( 59 - 89 ) | 63 | ( 23 - 82 ) |  |  |
| Fully Vaccinated                                                                                                                                         | 1496  | 19   | ( 1.3 )  | 94 | ( 90 - 96 ) | 92 | ( 86 - 95 ) |  |  |

By Ethnicity (regardless of race) among COVID-19 hospitalizations

VE mRNA vaccines among Hispanic adults aged  $\geq 50$  years

|                             |      |     |          |    |             |    |             |  |  |
|-----------------------------|------|-----|----------|----|-------------|----|-------------|--|--|
| Unvaccinated (Referent)     | 2376 | 656 | ( 27.6 ) |    |             |    |             |  |  |
| Partially 1-Dose Vaccinated | 307  | 36  | ( 11.7 ) | 65 | ( 51 - 76 ) | 56 | ( 35 - 70 ) |  |  |
| Partially 2-Dose Vaccinated | 264  | 16  | ( 6.1 )  | 83 | ( 73 - 90 ) | 80 | ( 63 - 89 ) |  |  |
| Fully Vaccinated            | 1540 | 35  | ( 2.3 )  | 94 | ( 92 - 96 ) | 90 | ( 85 - 93 ) |  |  |

VE mRNA vaccines among non-Hispanic adults aged  $\geq 50$  years

|                             |       |      |          |    |             |    |             |  |  |
|-----------------------------|-------|------|----------|----|-------------|----|-------------|--|--|
| Unvaccinated (Referent)     | 15361 | 2460 | ( 16.0 ) |    |             |    |             |  |  |
| Partially 1-Dose Vaccinated | 2318  | 144  | ( 6.2 )  | 65 | ( 59 - 71 ) | 57 | ( 48 - 65 ) |  |  |
| Partially 2-Dose Vaccinated | 1863  | 77   | ( 4.1 )  | 77 | ( 72 - 82 ) | 71 | ( 62 - 78 ) |  |  |
| Fully Vaccinated            | 11067 | 179  | ( 1.6 )  | 91 | ( 90 - 93 ) | 89 | ( 87 - 91 ) |  |  |

By Presence or Absence of Underlying Chronic Medical Conditions

Associated with Increased Risk of Severe Respiratory Disease

VE mRNA vaccines among aged  $\geq 50$  years with no chronic condition

|                             |      |     |          |    |             |    |             |  |  |
|-----------------------------|------|-----|----------|----|-------------|----|-------------|--|--|
| Unvaccinated (Referent)     | 1493 | 422 | ( 28.3 ) |    |             |    |             |  |  |
| Partially 1-Dose Vaccinated | 154  | 21  | ( 13.6 ) | 60 | ( 37 - 76 ) | 46 | ( 7 - 69 )  |  |  |
| Partially 2-Dose Vaccinated | 126  | 9   | ( 7.1 )  | 80 | ( 63 - 91 ) | 78 | ( 52 - 90 ) |  |  |
| Fully Vaccinated            | 565  | 14  | ( 2.5 )  | 94 | ( 89 - 96 ) | 92 | ( 86 - 96 ) |  |  |

VE mRNA vaccines among aged  $\geq 50$  years with  $\geq 1$  chronic respiratory condition

|                             |       |      |          |    |             |    |             |  |  |
|-----------------------------|-------|------|----------|----|-------------|----|-------------|--|--|
| Unvaccinated (Referent)     | 13018 | 2359 | ( 18.1 ) |    |             |    |             |  |  |
| Partially 1-Dose Vaccinated | 2033  | 140  | ( 6.9 )  | 67 | ( 60 - 72 ) | 56 | ( 47 - 64 ) |  |  |
| Partially 2-Dose Vaccinated | 1634  | 62   | ( 3.8 )  | 82 | ( 77 - 86 ) | 76 | ( 68 - 82 ) |  |  |
| Fully Vaccinated            | 10257 | 152  | ( 1.5 )  | 93 | ( 92 - 94 ) | 90 | ( 88 - 92 ) |  |  |

VE mRNA vaccines among aged  $\geq 50$  years with  $\geq 1$  chronic non-respiratory condition

|                             |       |      |          |    |             |    |             |  |  |
|-----------------------------|-------|------|----------|----|-------------|----|-------------|--|--|
| Unvaccinated (Referent)     | 18089 | 3043 | ( 16.8 ) |    |             |    |             |  |  |
| Partially 1-Dose Vaccinated | 2835  | 201  | ( 7.1 )  | 62 | ( 56 - 68 ) | 54 | ( 45 - 61 ) |  |  |
| Partially 2-Dose Vaccinated | 2302  | 97   | ( 4.2 )  | 78 | ( 73 - 82 ) | 71 | ( 62 - 77 ) |  |  |
| Fully Vaccinated            | 13999 | 240  | ( 1.7 )  | 91 | ( 90 - 92 ) | 88 | ( 86 - 90 ) |  |  |

By Alternative Clinical OutcomesVE mRNA vaccines among aged  $\geq 50$  years with acute respiratory illness diagnosis

|                             |       |      |          |    |             |    |             |  |  |
|-----------------------------|-------|------|----------|----|-------------|----|-------------|--|--|
| Unvaccinated (Referent)     | 14805 | 3632 | ( 24.5 ) |    |             |    |             |  |  |
| Partially 1-Dose Vaccinated | 2191  | 222  | ( 10.1 ) | 65 | ( 60 - 70 ) | 54 | ( 45 - 61 ) |  |  |
| Partially 2-Dose Vaccinated | 1748  | 104  | ( 5.9 )  | 81 | ( 76 - 84 ) | 74 | ( 67 - 79 ) |  |  |
| Fully Vaccinated            | 10686 | 248  | ( 2.3 )  | 93 | ( 92 - 94 ) | 89 | ( 88 - 91 ) |  |  |

VE mRNA vaccines among aged  $\geq 50$  years with clinical pneumonia diagnosis

|                             |      |      |          |    |             |    |             |  |  |
|-----------------------------|------|------|----------|----|-------------|----|-------------|--|--|
| Unvaccinated (Referent)     | 5491 | 2324 | ( 42.3 ) |    |             |    |             |  |  |
| Partially 1-Dose Vaccinated | 624  | 133  | ( 21.3 ) | 63 | ( 55 - 70 ) | 49 | ( 36 - 60 ) |  |  |
| Partially 2-Dose Vaccinated | 463  | 40   | ( 8.6 )  | 87 | ( 82 - 91 ) | 80 | ( 71 - 86 ) |  |  |
| Fully Vaccinated            | 2555 | 108  | ( 4.2 )  | 94 | ( 93 - 95 ) | 92 | ( 90 - 94 ) |  |  |

VE mRNA vaccines among aged  $\geq 50$  years with CLI/signs and symptoms as primary discharge code

|                             |       |      |          |    |             |    |             |  |  |
|-----------------------------|-------|------|----------|----|-------------|----|-------------|--|--|
| Unvaccinated (Referent)     | 13022 | 1942 | ( 14.9 ) |    |             |    |             |  |  |
| Partially 1-Dose Vaccinated | 1863  | 131  | ( 7.0 )  | 57 | ( 48 - 64 ) | 45 | ( 33 - 56 ) |  |  |
| Partially 2-Dose Vaccinated | 1449  | 63   | ( 4.3 )  | 74 | ( 67 - 80 ) | 68 | ( 57 - 77 ) |  |  |
| Fully Vaccinated            | 8094  | 119  | ( 1.5 )  | 91 | ( 90 - 93 ) | 88 | ( 86 - 91 ) |  |  |

Among ICU Admissions

## VE mRNA vaccines

|                             |      |     |          |    |             |    |             |  |  |
|-----------------------------|------|-----|----------|----|-------------|----|-------------|--|--|
| Unvaccinated (Referent)     | 4024 | 692 | ( 17.2 ) |    |             |    |             |  |  |
| Partially 1-Dose Vaccinated | 512  | 39  | ( 7.6 )  | 60 | ( 45 - 72 ) | 56 | ( 35 - 70 ) |  |  |
| Partially 2-Dose Vaccinated | 388  | 15  | ( 3.9 )  | 81 | ( 69 - 89 ) | 75 | ( 58 - 86 ) |  |  |
| Fully Vaccinated            | 2359 | 38  | ( 1.6 )  | 92 | ( 89 - 94 ) | 90 | ( 86 - 93 ) |  |  |

<sup>1</sup>Adjusted model using inverse propensity weights, calculated using strata specific data, in regression doubly accounting for calendar time, daily virus circulation, age, and geographic cluster.

<sup>2</sup>Variables that did not achieve SMD < 0.2 after propensity weighting and were included as covariates in the model were Admitting Hospital Type and Urban-Rural Classification of Facility

**Table S17. Messenger RNA (mRNA) vaccine effectiveness (VE) against COVID-19-associated hospitalizations and emergency department and urgent care (ED/UC) medical events by study site**

|                                                       | <u>IH</u>      | <u>KPNC</u>    | <u>RG</u>      | <u>UCO</u>     | <u>CUIMC</u>   | <u>KPNW</u>     |
|-------------------------------------------------------|----------------|----------------|----------------|----------------|----------------|-----------------|
|                                                       | % ( 95% CI )    |
| <b><u>mRNA VE among COVID-19 hospitalizations</u></b> |                |                |                |                |                |                 |
| VE both mRNA vaccines                                 |                |                |                |                |                |                 |
| Unvaccinated (Referent)                               |                |                |                |                |                |                 |
| Partially 1-Dose Vaccinated                           | 67 ( 50 - 79 ) | 66 ( 53 - 75 ) | 46 ( 30 - 59 ) | 69 ( 38 - 84 ) | 3 ( -46 - 35 ) | 39 ( -28 - 71 ) |
| Partially 2-Dose Vaccinated                           | 74 ( 55 - 86 ) | 83 ( 73 - 89 ) | 69 ( 55 - 79 ) | 64 ( 26 - 83 ) | 74 ( 48 - 87 ) | 68 ( -5 - 90 )  |
| Fully Vaccinated                                      | 91 ( 86 - 94 ) | 91 ( 88 - 93 ) | 87 ( 84 - 90 ) | 89 ( 79 - 94 ) | 82 ( 70 - 90 ) | 97 ( 91 - 99 )  |
| <b><u>mRNA VE among COVID-19 ED/UC</u></b>            |                |                |                |                |                |                 |
| VE both mRNA vaccines                                 |                |                |                |                |                |                 |
| Unvaccinated (Referent)                               |                |                |                |                |                |                 |
| Partially 1-Dose Vaccinated                           | 72 ( 63 - 79 ) |                | 60 ( 46 - 70 ) |                |                | 74 ( 56 - 84 )  |
| Partially 2-Dose Vaccinated                           | 77 ( 65 - 85 ) |                | 81 ( 71 - 88 ) |                |                | 80 ( 55 - 91 )  |
| Fully Vaccinated                                      | 89 ( 86 - 91 ) |                | 90 ( 85 - 93 ) |                |                | 97 ( 94 - 98 )  |

Legend: A separate model for Health Partners was not calculated because the sample size was not sufficient to calculate a stratified propensity to be vaccinated score.

CUIMC: Columbia University Irving Medical Center

HP: HealthPartners

IH: Intermountain Healthcare

KPNC: Kaiser Permanente Northern California

KPNW: Kaiser Permanente Northwest

RG: Regenstrief Institute

UCO: University of Colorado

**Table S18. Full listing of all estimates of messenger RNA (mRNA) vaccine effectiveness (VE) among COVID-19-associated hospitalization by days past most recent dose**

|                                                                  | Total | SARS-CoV-2 Positive | ( Row % ) | VE before Adjusted Model |             |    |              | VE <sup>1</sup> |            |  |  |
|------------------------------------------------------------------|-------|---------------------|-----------|--------------------------|-------------|----|--------------|-----------------|------------|--|--|
|                                                                  |       |                     |           | %                        | ( 95% CI )  |    |              | %               | ( 95% CI ) |  |  |
| <u>mRNA VE against COVID-19 hospitalizations</u>                 |       |                     |           |                          |             |    |              |                 |            |  |  |
| VE COVID-19 vaccines (aged ≥50 years)                            |       |                     |           |                          |             |    |              |                 |            |  |  |
| Unvaccinated (Referent)                                          | 20618 | 3711                | ( 18 )    |                          |             |    |              |                 |            |  |  |
| Indeterminate Vaccination (0-13 days post dose-1)                | 1751  | 290                 | ( 17 )    | 10                       | ( -3 - 21 ) | -4 | ( -21 - 10 ) |                 |            |  |  |
| Partially 1-Dose Vaccinated (14-27 days post dose-1)             | 1895  | 181                 | ( 10 )    | 52                       | ( 44 - 59 ) | 44 | ( 33 - 53 )  |                 |            |  |  |
| Partially 1-Dose Vaccinated (28-41 days post dose-1)             | 479   | 30                  | ( 6 )     | 70                       | ( 57 - 79 ) | 70 | ( 56 - 80 )  |                 |            |  |  |
| Partially 1-Dose Vaccinated (42-55 days post dose-1)             | 189   | 4                   | ( 2 )     | 90                       | ( 77 - 97 ) | 91 | ( 74 - 97 )  |                 |            |  |  |
| Partially 1-Dose Vaccinated (≥56 days post dose-1)               | 561   | 17                  | ( 3 )     | 86                       | ( 78 - 92 ) | 83 | ( 71 - 90 )  |                 |            |  |  |
| Partially 2-Dose Vaccinated (0-13 days post dose-2)              | 2497  | 107                 | ( 4 )     | 80                       | ( 75 - 83 ) | 74 | ( 67 - 79 )  |                 |            |  |  |
| Fully Vaccinated (14-27 days post dose-2)                        | 2754  | 48                  | ( 2 )     | 92                       | ( 89 - 94 ) | 88 | ( 84 - 92 )  |                 |            |  |  |
| Fully Vaccinated (28-41 days post dose-2)                        | 2783  | 41                  | ( 1 )     | 93                       | ( 91 - 95 ) | 92 | ( 88 - 94 )  |                 |            |  |  |
| Fully Vaccinated (42-55 days post dose-2)                        | 2603  | 41                  | ( 2 )     | 93                       | ( 90 - 95 ) | 90 | ( 87 - 93 )  |                 |            |  |  |
| Fully Vaccinated (56-69 days post dose-2)                        | 2394  | 51                  | ( 2 )     | 90                       | ( 87 - 93 ) | 86 | ( 82 - 90 )  |                 |            |  |  |
| Fully Vaccinated (70-83 days post dose-2)                        | 2048  | 24                  | ( 1 )     | 95                       | ( 92 - 96 ) | 93 | ( 89 - 95 )  |                 |            |  |  |
| Fully Vaccinated (84-97 days post dose-2)                        | 1528  | 27                  | ( 2 )     | 92                       | ( 88 - 95 ) | 86 | ( 79 - 91 )  |                 |            |  |  |
| Fully Vaccinated (98-111 days post dose-2)                       | 971   | 23                  | ( 2 )     | 89                       | ( 84 - 93 ) | 82 | ( 72 - 89 )  |                 |            |  |  |
| Fully Vaccinated (≥112 days post dose-2)                         | 568   | 11                  | ( 2 )     | 91                       | ( 84 - 95 ) | 86 | ( 74 - 93 )  |                 |            |  |  |
| <u>By mRNA vaccine product against COVID-19 hospitalizations</u> |       |                     |           |                          |             |    |              |                 |            |  |  |
| VE of BioNTech-Pfizer mRNA (aged ≥50 years)                      |       |                     |           |                          |             |    |              |                 |            |  |  |
| Unvaccinated (Referent)                                          | 20618 | 3711                | ( 18 )    |                          |             |    |              |                 |            |  |  |
| Indeterminate Vaccination (0-13 days post dose-1)                | 976   | 163                 | ( 17 )    | 9                        | ( -8 - 23 ) | -3 | ( -26 - 15 ) |                 |            |  |  |
| Partially 1-Dose Vaccinated (14-27 days post dose-1)             | 939   | 112                 | ( 12 )    | 38                       | ( 25 - 50 ) | 26 | ( 7 - 41 )   |                 |            |  |  |
| Partially 1-Dose Vaccinated (28-41 days post dose-1)             | 168   | 17                  | ( 10 )    | 49                       | ( 18 - 70 ) | 47 | ( 7 - 70 )   |                 |            |  |  |
| Partially 1-Dose Vaccinated (42-55 days post dose-1)             | 79    | 3                   | ( 4 )     | 82                       | ( 52 - 96 ) | 80 | ( 32 - 94 )  |                 |            |  |  |
| Partially 1-Dose Vaccinated (≥56 days post dose-1)               | 283   | 8                   | ( 3 )     | 87                       | ( 75 - 94 ) | 86 | ( 69 - 93 )  |                 |            |  |  |
| Partially 2-Dose Vaccinated (0-13 days post dose-2)              | 1357  | 57                  | ( 4 )     | 80                       | ( 74 - 85 ) | 73 | ( 63 - 80 )  |                 |            |  |  |
| Fully Vaccinated (14-27 days post dose-2)                        | 1586  | 33                  | ( 2 )     | 90                       | ( 87 - 93 ) | 87 | ( 80 - 91 )  |                 |            |  |  |
| Fully Vaccinated (28-41 days post dose-2)                        | 1572  | 17                  | ( 1 )     | 95                       | ( 92 - 97 ) | 95 | ( 91 - 97 )  |                 |            |  |  |
| Fully Vaccinated (42-55 days post dose-2)                        | 1456  | 28                  | ( 2 )     | 91                       | ( 87 - 94 ) | 86 | ( 79 - 91 )  |                 |            |  |  |
| Fully Vaccinated (56-69 days post dose-2)                        | 1365  | 32                  | ( 2 )     | 89                       | ( 85 - 92 ) | 83 | ( 75 - 89 )  |                 |            |  |  |

|                                                           |       |      |        |    |              |     |              |
|-----------------------------------------------------------|-------|------|--------|----|--------------|-----|--------------|
| Fully Vaccinated (70-83 days post dose-2)                 | 1184  | 17   | ( 1 )  | 93 | ( 90 - 96 )  | 90  | ( 82 - 94 )  |
| Fully Vaccinated (84-97 days post dose-2)                 | 863   | 12   | ( 1 )  | 94 | ( 89 - 97 )  | 87  | ( 76 - 93 )  |
| Fully Vaccinated (98-111 days post dose-2)                | 560   | 18   | ( 3 )  | 85 | ( 77 - 91 )  | 75  | ( 57 - 85 )  |
| Fully Vaccinated ( $\geq 112$ days post dose-2)           | 362   | 9    | ( 2 )  | 88 | ( 79 - 94 )  | 83  | ( 64 - 92 )  |
| VE of Moderna mRNA (aged $\geq 50$ years)                 |       |      |        |    |              |     |              |
| Unvaccinated (Referent)                                   | 20618 | 3711 | ( 18 ) |    |              |     |              |
| Indeterminate Vaccination (0-13 days post dose-1)         | 775   | 127  | ( 16 ) | 11 | ( -8 - 27 )  | -12 | ( -41 - 11 ) |
| Partially 1-Dose Vaccinated (14-27 days post dose-1)      | 956   | 69   | ( 7 )  | 65 | ( 55 - 73 )  | 58  | ( 44 - 69 )  |
| Partially 1-Dose Vaccinated (28-41 days post dose-1)      | 311   | 13   | ( 4 )  | 80 | ( 67 - 89 )  | 81  | ( 65 - 90 )  |
| Partially 1-Dose Vaccinated (42-55 days post dose-1)      | 110   | 1    | ( 1 )  | 96 | ( 81 - 100 ) | 98  | ( 82 - 100 ) |
| Partially 1-Dose Vaccinated ( $\geq 56$ days post dose-1) | 280   | 9    | ( 3 )  | 85 | ( 72 - 93 )  | 80  | ( 54 - 91 )  |
| Partially 2-Dose Vaccinated (0-13 days post dose-2)       | 1140  | 50   | ( 4 )  | 79 | ( 73 - 84 )  | 74  | ( 63 - 81 )  |
| Fully Vaccinated (14-27 days post dose-2)                 | 1168  | 15   | ( 1 )  | 94 | ( 90 - 97 )  | 90  | ( 81 - 94 )  |
| Fully Vaccinated (28-41 days post dose-2)                 | 1211  | 24   | ( 2 )  | 91 | ( 87 - 94 )  | 89  | ( 83 - 93 )  |
| Fully Vaccinated (42-55 days post dose-2)                 | 1147  | 13   | ( 1 )  | 95 | ( 91 - 97 )  | 93  | ( 87 - 97 )  |
| Fully Vaccinated ( $\geq 56$ days post dose-2)            | 1029  | 19   | ( 2 )  | 91 | ( 87 - 95 )  | 91  | ( 85 - 94 )  |
| Fully Vaccinated (56-69 days post dose-2)                 | 864   | 7    | ( 1 )  | 96 | ( 93 - 98 )  | 96  | ( 92 - 98 )  |
| Fully Vaccinated (70-83 days post dose-2)                 | 665   | 15   | ( 2 )  | 89 | ( 83 - 94 )  | 86  | ( 75 - 92 )  |
| Fully Vaccinated (84-97 days post dose-2)                 | 411   | 5    | ( 1 )  | 94 | ( 88 - 98 )  | 93  | ( 82 - 97 )  |
| Fully Vaccinated ( $\geq 112$ days post dose-2)           | 206   | 2    | ( 1 )  | 96 | ( 86 - 99 )  | 95  | ( 79 - 99 )  |
| Ad26.COV2.S (Johnson & Johnson)                           |       |      |        |    |              |     |              |
| Unvaccinated (Referent)                                   | 10761 | 2006 | ( 19 ) |    |              |     |              |
| Indeterminate Vaccination (0-13 days post dose)           | 78    | 2    | ( 3 )  | 37 | ( -1 - 64 )  | 19  | ( -41 - 53 ) |
| Fully Vaccinated (14-27 days post dose)                   | 135   | 3    | ( 3 )  | 77 | ( 58 - 89 )  | 72  | ( 38 - 88 )  |
| Fully Vaccinated (28-41 days post dose)                   | 120   | 6    | ( 5 )  | 76 | ( 55 - 89 )  | 69  | ( 34 - 86 )  |
| Fully Vaccinated (42-55 days post dose)                   | 132   | 5    | ( 4 )  | 79 | ( 57 - 92 )  | 68  | ( 18 - 87 )  |
| Fully Vaccinated ( $\geq 56$ days post dose)              | 188   | 6    | ( 3 )  | 85 | ( 72 - 93 )  | 79  | ( 48 - 91 )  |

<sup>1</sup>Adjusted model using inverse propensity weights, calculated using strata specific data, in regression doubly accounting for calendar time, daily virus circulation, age, and geographic cluster.

**Table S19. Full listing of all estimates of messenger RNA (mRNA) vaccine effectiveness (VE) among COVID-19-associated emergency department and urgent care (ED/UC) medical events**

|                                                         | Total | SARS-CoV-2<br>Positive | ( Row % ) | VE before Adjusted Model |             |    |             | VE <sup>1</sup> |            |  |  |
|---------------------------------------------------------|-------|------------------------|-----------|--------------------------|-------------|----|-------------|-----------------|------------|--|--|
|                                                         |       |                        |           | %                        | ( 95% CI )  |    |             | %               | ( 95% CI ) |  |  |
| <u>mRNA VE among COVID-19 ED/UC medical events</u>      |       |                        |           |                          |             |    |             |                 |            |  |  |
| VE both mRNA vaccines (aged ≥50 years)                  |       |                        |           |                          |             |    |             |                 |            |  |  |
| Unvaccinated (Referent)                                 | 11812 | 2847                   | ( 24.1 )  |                          |             |    |             |                 |            |  |  |
| Partially 1-Dose Vaccinated                             | 1920  | 155                    | ( 8.1 )   | 72                       | ( 67 - 77 ) | 68 | ( 61 - 74 ) |                 |            |  |  |
| Partially 2-Dose Vaccinated                             | 1269  | 66                     | ( 5.2 )   | 83                       | ( 78 - 87 ) | 80 | ( 73 - 85 ) |                 |            |  |  |
| Fully Vaccinated                                        | 6065  | 154                    | ( 2.5 )   | 92                       | ( 90 - 93 ) | 91 | ( 89 - 93 ) |                 |            |  |  |
| <u>By vaccine product among COVID-19 medical events</u> |       |                        |           |                          |             |    |             |                 |            |  |  |
| VE of BioNTech-Pfizer mRNA (aged ≥50 years)             |       |                        |           |                          |             |    |             |                 |            |  |  |
| Unvaccinated (Referent)                                 | 11812 | 2847                   | ( 24.1 )  |                          |             |    |             |                 |            |  |  |
| Partially 1-Dose Vaccinated                             | 912   | 88                     | ( 9.6 )   | 66                       | ( 58 - 73 ) | 58 | ( 46 - 68 ) |                 |            |  |  |
| Partially 2-Dose Vaccinated                             | 711   | 31                     | ( 4.4 )   | 86                       | ( 79 - 90 ) | 82 | ( 74 - 88 ) |                 |            |  |  |
| Fully Vaccinated                                        | 3589  | 105                    | ( 2.9 )   | 91                       | ( 88 - 92 ) | 89 | ( 85 - 91 ) |                 |            |  |  |
| VE of Moderna mRNA (aged ≥50 years)                     |       |                        |           |                          |             |    |             |                 |            |  |  |
| Unvaccinated (Referent)                                 | 11812 | 2847                   | ( 24.1 )  |                          |             |    |             |                 |            |  |  |
| Partially 1-Dose Vaccinated                             | 1008  | 67                     | ( 6.6 )   | 78                       | ( 71 - 83 ) | 73 | ( 64 - 79 ) |                 |            |  |  |
| Partially 2-Dose Vaccinated                             | 558   | 35                     | ( 6.3 )   | 79                       | ( 70 - 85 ) | 72 | ( 59 - 81 ) |                 |            |  |  |
| Fully Vaccinated                                        | 2476  | 49                     | ( 2.0 )   | 94                       | ( 92 - 95 ) | 92 | ( 89 - 94 ) |                 |            |  |  |
| Ad26.COVS.2.S (Johnson & Johnson)                       |       |                        |           |                          |             |    |             |                 |            |  |  |
| Unvaccinated (Referent)                                 | 8461  | 2200                   | ( 26.0 )  |                          |             |    |             |                 |            |  |  |
| Full 1-dose Vaccinated                                  | 456   | 29                     | ( 6.4 )   | 81                       | ( 72 - 87 ) | 73 | ( 59 - 82 ) |                 |            |  |  |
| <u>By Age Group among COVID-19 medical events</u>       |       |                        |           |                          |             |    |             |                 |            |  |  |
| VE both mRNA vaccines (aged 50-64 years)                |       |                        |           |                          |             |    |             |                 |            |  |  |
| Unvaccinated (Referent)                                 | 4908  | 1416                   | ( 28.9 )  |                          |             |    |             |                 |            |  |  |
| Partially 1-Dose Vaccinated                             | 547   | 50                     | ( 9.1 )   | 75                       | ( 67 - 82 ) | 73 | ( 63 - 80 ) |                 |            |  |  |
| Partially 2-Dose Vaccinated                             | 325   | 13                     | ( 4.0 )   | 90                       | ( 82 - 94 ) | 90 | ( 82 - 94 ) |                 |            |  |  |
| Fully Vaccinated                                        | 1336  | 35                     | ( 2.6 )   | 93                       | ( 91 - 95 ) | 93 | ( 90 - 95 ) |                 |            |  |  |
| VE both mRNA vaccines (aged 65-74 years)                |       |                        |           |                          |             |    |             |                 |            |  |  |



|                                                             |      |      |          |    |             |    |              |  |  |  |
|-------------------------------------------------------------|------|------|----------|----|-------------|----|--------------|--|--|--|
| Unvaccinated (Referent)                                     | 3518 | 829  | ( 23.6 ) |    |             |    |              |  |  |  |
| Partially 1-Dose Vaccinated                                 | 611  | 47   | ( 7.7 )  | 73 | ( 63 - 80 ) | 72 | ( 61 - 80 )  |  |  |  |
| Partially 2-Dose Vaccinated                                 | 403  | 22   | ( 5.5 )  | 81 | ( 71 - 88 ) | 81 | ( 69 - 88 )  |  |  |  |
| Fully Vaccinated                                            | 1915 | 48   | ( 2.5 )  | 92 | ( 89 - 94 ) | 92 | ( 89 - 94 )  |  |  |  |
| VE both mRNA vaccines (aged 75-84 years)                    |      |      |          |    |             |    |              |  |  |  |
| Unvaccinated (Referent)                                     | 2359 | 459  | ( 19.5 ) |    |             |    |              |  |  |  |
| Partially 1-Dose Vaccinated                                 | 539  | 45   | ( 8.3 )  | 62 | ( 48 - 73 ) | 59 | ( 41 - 71 )  |  |  |  |
| Partially 2-Dose Vaccinated                                 | 369  | 21   | ( 5.7 )  | 75 | ( 61 - 84 ) | 63 | ( 39 - 78 )  |  |  |  |
| Fully Vaccinated                                            | 1893 | 51   | ( 2.7 )  | 89 | ( 85 - 91 ) | 89 | ( 85 - 92 )  |  |  |  |
| VE both mRNA vaccines (aged ≥85 years)                      |      |      |          |    |             |    |              |  |  |  |
| Unvaccinated (Referent)                                     | 1027 | 143  | ( 13.9 ) |    |             |    |              |  |  |  |
| Partially 1-Dose Vaccinated                                 | 223  | 13   | ( 5.8 )  | 62 | ( 31 - 79 ) | 44 | ( -8 - 71 )  |  |  |  |
| Partially 2-Dose Vaccinated                                 | 172  | 10   | ( 5.8 )  | 62 | ( 26 - 80 ) | 54 | ( 6 - 77 )   |  |  |  |
| Fully Vaccinated                                            | 921  | 20   | ( 2.2 )  | 86 | ( 78 - 91 ) | 84 | ( 73 - 91 )  |  |  |  |
| <u>By Race and Ethnicity among COVID-19 medical events</u>  |      |      |          |    |             |    |              |  |  |  |
| -                                                           |      |      |          |    |             |    |              |  |  |  |
| VE both mRNA vaccines among White adults aged ≥50 years     |      |      |          |    |             |    |              |  |  |  |
| Unvaccinated (Referent)                                     | 9334 | 2158 | ( 23.1 ) |    |             |    |              |  |  |  |
| Partially 1-Dose Vaccinated                                 | 1599 | 114  | ( 7.1 )  | 74 | ( 69 - 79 ) | 70 | ( 63 - 76 )  |  |  |  |
| Partially 2-Dose Vaccinated                                 | 1076 | 53   | ( 4.9 )  | 83 | ( 77 - 87 ) | 78 | ( 70 - 84 )  |  |  |  |
| Fully Vaccinated                                            | 5182 | 128  | ( 2.5 )  | 92 | ( 90 - 93 ) | 91 | ( 89 - 93 )  |  |  |  |
| VE both mRNA vaccines among Black adults aged ≥50 years     |      |      |          |    |             |    |              |  |  |  |
| Unvaccinated (Referent)                                     | 604  | 166  | ( 27.5 ) |    |             |    |              |  |  |  |
| Partially 1-Dose Vaccinated                                 | 55   | 7    | ( 12.7 ) | 62 | ( 13 - 83 ) | 59 | ( 0 - 83 )   |  |  |  |
| Partially 2-Dose Vaccinated                                 | 25   | 1    | ( 4.0 )  | 89 | ( 18 - 99 ) | 82 | ( -71 - 98 ) |  |  |  |
| Fully Vaccinated                                            | 134  | 3    | ( 2.2 )  | 94 | ( 81 - 98 ) | 95 | ( 84 - 98 )  |  |  |  |
| VE both mRNA vaccines among Other or Unknown aged ≥50 years |      |      |          |    |             |    |              |  |  |  |
| Unvaccinated (Referent)                                     | 1874 | 523  | ( 27.9 ) |    |             |    |              |  |  |  |
| Partially 1-Dose Vaccinated                                 | 266  | 34   | ( 12.8 ) | 62 | ( 45 - 74 ) | 57 | ( 37 - 71 )  |  |  |  |
| Partially 2-Dose Vaccinated                                 | 168  | 12   | ( 7.1 )  | 80 | ( 64 - 89 ) | 84 | ( 70 - 92 )  |  |  |  |
| Fully Vaccinated                                            | 749  | 23   | ( 3.1 )  | 92 | ( 87 - 95 ) | 87 | ( 79 - 93 )  |  |  |  |

|                                                                                                                                     |       |      |   |      |   |    |   |    |   |    |
|-------------------------------------------------------------------------------------------------------------------------------------|-------|------|---|------|---|----|---|----|---|----|
| VE both mRNA vaccines among Hispanic adults aged $\geq 50$ years                                                                    |       |      |   |      |   |    |   |    |   |    |
| Unvaccinated (Referent)                                                                                                             | 725   | 248  | ( | 34.2 | ) |    |   |    |   |    |
| Partially 1-Dose Vaccinated                                                                                                         | 102   | 14   | ( | 13.7 | ) | 69 | ( | 45 | - | 83 |
| Partially 2-Dose Vaccinated                                                                                                         | 65    | 5    | ( | 7.7  | ) | 84 | ( | 60 | - | 94 |
| Fully Vaccinated                                                                                                                    | 250   | 23   | ( | 9.2  | ) | 81 | ( | 69 | - | 88 |
| VE both mRNA vaccines among Non-Hispanic adults aged $\geq 50$ years                                                                |       |      |   |      |   |    |   |    |   |    |
| Unvaccinated (Referent)                                                                                                             | 11087 | 2599 | ( | 23.4 | ) |    |   |    |   |    |
| Partially 1-Dose Vaccinated                                                                                                         | 1818  | 141  | ( | 7.8  | ) | 73 | ( | 67 | - | 77 |
| Partially 2-Dose Vaccinated                                                                                                         | 1204  | 61   | ( | 5.1  | ) | 83 | ( | 77 | - | 87 |
| Fully Vaccinated                                                                                                                    | 5815  | 131  | ( | 2.2  | ) | 92 | ( | 91 | - | 94 |
| <u>By Presence of Absence of Underlying Chronic Medical Conditions Associated with Increased Risk of Severe Respiratory Disease</u> |       |      |   |      |   |    |   |    |   |    |
| VE both mRNA vaccines among aged $\geq 50$ years with no chronic condition                                                          |       |      |   |      |   |    |   |    |   |    |
| Unvaccinated (Referent)                                                                                                             | 4524  | 1446 | ( | 32.0 | ) |    |   |    |   |    |
| Partially 1-Dose Vaccinated                                                                                                         | 634   | 82   | ( | 12.9 | ) | 68 | ( | 60 | - | 75 |
| Partially 2-Dose Vaccinated                                                                                                         | 393   | 30   | ( | 7.6  | ) | 82 | ( | 74 | - | 88 |
| Fully Vaccinated                                                                                                                    | 1805  | 52   | ( | 2.9  | ) | 94 | ( | 92 | - | 95 |
| VE both mRNA vaccines among aged $\geq 50$ years with $\geq 1$ chronic respiratory condition                                        |       |      |   |      |   |    |   |    |   |    |
| Unvaccinated (Referent)                                                                                                             | 3832  | 677  | ( | 17.7 | ) |    |   |    |   |    |
| Partially 1-Dose Vaccinated                                                                                                         | 703   | 36   | ( | 5.1  | ) | 75 | ( | 64 | - | 82 |
| Partially 2-Dose Vaccinated                                                                                                         | 463   | 20   | ( | 4.3  | ) | 79 | ( | 67 | - | 87 |
| Fully Vaccinated                                                                                                                    | 2206  | 44   | ( | 2.0  | ) | 91 | ( | 87 | - | 93 |
| VE both mRNA vaccines among aged $\geq 50$ years with $\geq 1$ chronic non-respiratory condition                                    |       |      |   |      |   |    |   |    |   |    |
| Unvaccinated (Referent)                                                                                                             | 6483  | 1293 | ( | 19.9 | ) |    |   |    |   |    |
| Partially 1-Dose Vaccinated                                                                                                         | 1179  | 67   | ( | 5.7  | ) | 76 | ( | 69 | - | 81 |
| Partially 2-Dose Vaccinated                                                                                                         | 796   | 33   | ( | 4.2  | ) | 83 | ( | 75 | - | 88 |
| Fully Vaccinated                                                                                                                    | 3947  | 98   | ( | 2.5  | ) | 90 | ( | 87 | - | 92 |

By Alternative Clinical Outcomes

|                                                                                                        |      |      |   |      |   |    |   |         |   |
|--------------------------------------------------------------------------------------------------------|------|------|---|------|---|----|---|---------|---|
| VE both mRNA vaccines among aged $\geq 50$ years with acute respiratory illness diagnosis              |      |      |   |      |   |    |   |         |   |
| Unvaccinated (Referent)                                                                                | 6785 | 2541 | ( | 37.5 | ) |    |   |         |   |
| Partially 1-Dose Vaccinated                                                                            | 992  | 136  | ( | 13.7 | ) | 73 | ( | 68 - 78 | ) |
| Partially 2-Dose Vaccinated                                                                            | 606  | 54   | ( | 8.9  | ) | 84 | ( | 78 - 88 | ) |
| Fully Vaccinated                                                                                       | 2992 | 135  | ( | 4.5  | ) | 92 | ( | 91 - 93 | ) |
| VE both mRNA vaccines among aged $\geq 50$ years with clinical pneumonia diagnosis                     |      |      |   |      |   |    |   |         |   |
| Unvaccinated (Referent)                                                                                | 1962 | 930  | ( | 47.4 | ) |    |   |         |   |
| Partially 1-Dose Vaccinated                                                                            | 220  | 36   | ( | 16.4 | ) | 78 | ( | 69 - 85 | ) |
| Partially 2-Dose Vaccinated                                                                            | 165  | 14   | ( | 8.5  | ) | 90 | ( | 82 - 94 | ) |
| Fully Vaccinated                                                                                       | 797  | 33   | ( | 4.1  | ) | 95 | ( | 93 - 97 | ) |
| VE both mRNA vaccines among aged $\geq 50$ years with CLI/signs and symptoms as primary discharge code |      |      |   |      |   |    |   |         |   |
| Unvaccinated (Referent)                                                                                | 6885 | 2365 | ( | 34.4 | ) |    |   |         |   |
| Partially 1-Dose Vaccinated                                                                            | 944  | 122  | ( | 12.9 | ) | 72 | ( | 65 - 77 | ) |
| Partially 2-Dose Vaccinated                                                                            | 599  | 46   | ( | 7.7  | ) | 84 | ( | 78 - 88 | ) |
| Fully Vaccinated                                                                                       | 2619 | 109  | ( | 4.2  | ) | 92 | ( | 90 - 93 | ) |

<sup>1</sup>Adjusted model using inverse propensity weights, calculated using strata specific data, in regression doubly accounting for calendar time, daily virus circulation, age, and geographic cluster.

**Table\_S20. Full listing of all estimates of messenger RNA (mRNA) vaccine effectiveness (VE) among COVID-19-associated emergency department and urgent care (ED/UC) medical events by days past most recent dose**

|                                                       | Total | SARS-CoV-2 Positive | Row (%)  | VE before Adjusted Model |                                       |                 | VE <sup>1</sup>                       |        |  |
|-------------------------------------------------------|-------|---------------------|----------|--------------------------|---------------------------------------|-----------------|---------------------------------------|--------|--|
|                                                       |       |                     |          | %                        | 95% CI                                |                 | %                                     | 95% CI |  |
| <u>mRNA VE against COVID-19 ED/UC</u>                 |       |                     |          |                          |                                       |                 |                                       |        |  |
| VE COVID-19 vaccines (aged ≥50 years)                 |       |                     |          |                          |                                       |                 |                                       |        |  |
| Unvaccinated (Referent)                               | 11812 | 2847                | ( 24.1 ) |                          |                                       |                 |                                       |        |  |
| Indeterminate Vaccination (0-13 days post dose-1)     | 1255  | 252                 | ( 20.1 ) | 21                       | ( 9 - 32 )                            | 6               | ( -10 - 20 )                          |        |  |
| Partially 1-Dose Vaccinated (14-27 days post dose-1)  | 1346  | 128                 | ( 9.5 )  | 67                       | ( 60 - 73 )                           | 63              | ( 54 - 69 )                           |        |  |
| Partially 1-Dose Vaccinated (28-41 days post dose-1)  | 307   | 18                  | ( 5.9 )  | 80                       | ( 68 - 88 )                           | 77              | ( 59 - 87 )                           |        |  |
| Partially 1-Dose Vaccinated (42-55 days post dose-1)  | 72    | 2                   | ( 2.8 )  | 91                       | ( 63 - 98 )                           | 91              | ( 60 - 98 )                           |        |  |
| Partially 1-Dose Vaccinated (≥56 days post dose-1)    | 195   | 7                   | ( 3.6 )  | 88                       | ( 75 - 94 )                           | 88              | ( 73 - 95 )                           |        |  |
| Partially 2-Dose Vaccinated (0-13 days post dose-2)   | 1269  | 66                  | ( 5.2 )  | 83                       | ( 78 - 87 )                           | 80              | ( 74 - 85 )                           |        |  |
| Fully Vaccinated (14-27 days post dose-2)             | 1198  | 23                  | ( 1.9 )  | 94                       | ( 91 - 96 )                           | 92              | ( 88 - 95 )                           |        |  |
| Fully Vaccinated (28-41 days post dose-2)             | 1170  | 20                  | ( 1.7 )  | 95                       | ( 91 - 96 )                           | 95              | ( 92 - 97 )                           |        |  |
| Fully Vaccinated (42-55 days post dose-2)             | 1067  | 18                  | ( 1.7 )  | 95                       | ( 91 - 97 )                           | 95              | ( 91 - 97 )                           |        |  |
| Fully Vaccinated (56-69 days post dose-2)             | 924   | 28                  | ( 3.0 )  | 90                       | ( 86 - 93 )                           | 88              | ( 81 - 92 )                           |        |  |
| Fully Vaccinated (70-83 days post dose-2)             | 667   | 24                  | ( 3.6 )  | 88                       | ( 82 - 92 )                           | 86              | ( 78 - 91 )                           |        |  |
| Fully Vaccinated (84-97 days post dose-2)             | 487   | 13                  | ( 2.7 )  | 91                       | ( 85 - 95 )                           | 92              | ( 87 - 96 )                           |        |  |
| Fully Vaccinated (98-111 days post dose-2)            | 331   | 17                  | ( 5.1 )  | 83                       | ( 72 - 90 )                           | 86              | ( 77 - 92 )                           |        |  |
| Fully Vaccinated (≥112 days post dose-2)              | 221   | 11                  | ( 5.0 )  | 84                       | ( 70 - 91 )                           | 86              | ( 74 - 93 )                           |        |  |
| <u>By mRNA vaccine product against COVID-19 ED/UC</u> |       |                     |          |                          |                                       |                 |                                       |        |  |
| VE of BioNTech-Pfizer mRNA (aged ≥50 years)           |       |                     |          |                          |                                       |                 |                                       |        |  |
| Unvaccinated (Referent)                               | 11812 | 2847                | ( 24.1 ) |                          |                                       |                 |                                       |        |  |
| Indeterminate Vaccination (0-13 days post dose-1)     | 673   | 129                 | ( 19.2 ) | 25                       | ( 9 - 39 )                            | 1               | ( -25 - 22 )                          |        |  |
| Partially 1-Dose Vaccinated (14-27 days post dose-1)  | 685   | 76                  | ( 11.1 ) | 61                       | ( 50 - 69 )                           | 53              | ( 38 - 65 )                           |        |  |
| Partially 1-Dose Vaccinated (28-41 days post dose-1)  | 97    | 8                   | ( 8.2 )  | 72                       | ( 42 - 86 )                           | 77              | ( 47 - 90 )                           |        |  |
| Partially 1-Dose Vaccinated (42-55 days post dose-1)  | 33    | 0                   | ( 0.0 )  | NC <sup>2</sup>          | ( NC <sup>2</sup> - NC <sup>2</sup> ) | NC <sup>2</sup> | ( NC <sup>2</sup> - NC <sup>2</sup> ) |        |  |
| Partially 1-Dose Vaccinated (≥56 days post dose-1)    | 97    | 4                   | ( 4.1 )  | 86                       | ( 63 - 95 )                           | 80              | ( 39 - 94 )                           |        |  |
| Partially 2-Dose Vaccinated (0-13 days post dose-2)   | 711   | 31                  | ( 4.4 )  | 86                       | ( 79 - 90 )                           | 83              | ( 74 - 88 )                           |        |  |
| Fully Vaccinated (14-27 days post dose-2)             | 725   | 13                  | ( 1.8 )  | 94                       | ( 90 - 97 )                           | 93              | ( 87 - 96 )                           |        |  |
| Fully Vaccinated (28-41 days post dose-2)             | 680   | 13                  | ( 1.9 )  | 94                       | ( 89 - 96 )                           | 94              | ( 90 - 97 )                           |        |  |
| Fully Vaccinated (42-55 days post dose-2)             | 608   | 8                   | ( 1.3 )  | 96                       | ( 92 - 98 )                           | 93              | ( 81 - 97 )                           |        |  |
| Fully Vaccinated (56-69 days post dose-2)             | 548   | 18                  | ( 3.3 )  | 89                       | ( 83 - 93 )                           | 82              | ( 68 - 90 )                           |        |  |
| Fully Vaccinated (70-83 days post dose-2)             | 391   | 18                  | ( 4.6 )  | 85                       | ( 76 - 91 )                           | 80              | ( 66 - 88 )                           |        |  |

|                                                             |       |      |          |                 |                                       |                 |                                       |
|-------------------------------------------------------------|-------|------|----------|-----------------|---------------------------------------|-----------------|---------------------------------------|
| Fully Vaccinated (84-97 days post dose-2)                   | 275   | 9    | ( 3.3 )  | 89              | ( 79 - 95 )                           | 91              | ( 82 - 96 )                           |
| Fully Vaccinated (98-111 days post dose-2)                  | 224   | 17   | ( 7.6 )  | 74              | ( 58 - 84 )                           | 78              | ( 61 - 87 )                           |
| Fully Vaccinated ( $\geq 112$ days post dose-2)             | 138   | 9    | ( 6.5 )  | 78              | ( 57 - 89 )                           | 83              | ( 64 - 92 )                           |
| <b>VE of Moderna mRNA (aged <math>\geq 50</math> years)</b> |       |      |          |                 |                                       |                 |                                       |
| Unvaccinated (Referent)                                     | 11812 | 2847 | ( 24.1 ) |                 |                                       |                 |                                       |
| Indeterminate Vaccination (0-13 days post dose-1)           | 582   | 123  | ( 21.1 ) | 16              | ( -3 - 31 )                           | 0               | ( -25 - 21 )                          |
| Partially 1-Dose Vaccinated (14-27 days post dose-1)        | 661   | 52   | ( 7.9 )  | 73              | ( 64 - 80 )                           | 67              | ( 56 - 76 )                           |
| Partially 1-Dose Vaccinated (28-41 days post dose-1)        | 210   | 10   | ( 4.8 )  | 84              | ( 70 - 92 )                           | 78              | ( 54 - 90 )                           |
| Partially 1-Dose Vaccinated (42-55 days post dose-1)        | 39    | 2    | ( 5.1 )  | 83              | ( 30 - 96 )                           | 87              | ( 41 - 97 )                           |
| Partially 1-Dose Vaccinated ( $\geq 56$ days post dose-1)   | 98    | 3    | ( 3.1 )  | 90              | ( 69 - 97 )                           | 92              | ( 72 - 97 )                           |
| Partially 2-Dose Vaccinated (0-13 days post dose-2)         | 558   | 35   | ( 6.3 )  | 79              | ( 70 - 85 )                           | 74              | ( 62 - 82 )                           |
| Fully Vaccinated (14-27 days post dose-2)                   | 473   | 10   | ( 2.1 )  | 93              | ( 87 - 96 )                           | 90              | ( 81 - 95 )                           |
| Fully Vaccinated (28-41 days post dose-2)                   | 490   | 7    | ( 1.4 )  | 95              | ( 90 - 98 )                           | 96              | ( 92 - 98 )                           |
| Fully Vaccinated (42-55 days post dose-2)                   | 459   | 10   | ( 2.2 )  | 93              | ( 87 - 96 )                           | 93              | ( 85 - 96 )                           |
| Fully Vaccinated ( $\geq 56$ days post dose-2)              | 376   | 10   | ( 2.7 )  | 91              | ( 84 - 95 )                           | 90              | ( 79 - 95 )                           |
| Fully Vaccinated (56-69 days post dose-2)                   | 276   | 6    | ( 2.2 )  | 93              | ( 84 - 97 )                           | 91              | ( 79 - 96 )                           |
| Fully Vaccinated (70-83 days post dose-2)                   | 212   | 4    | ( 1.9 )  | 94              | ( 84 - 98 )                           | 91              | ( 74 - 97 )                           |
| Fully Vaccinated (84-97 days post dose-2)                   | 107   | 0    | ( 0.0 )  | NC <sup>2</sup> | ( NC <sup>2</sup> - NC <sup>2</sup> ) | NC <sup>2</sup> | ( NC <sup>2</sup> - NC <sup>2</sup> ) |
| Fully Vaccinated ( $\geq 112$ days post dose-2)             | 83    | 2    | ( 2.4 )  | 92              | ( 68 - 98 )                           | 90              | ( 52 - 98 )                           |
| <b>Ad26.COVS.2.S (Johnson &amp; Johnson)</b>                |       |      |          |                 |                                       |                 |                                       |
| Unvaccinated (Referent)                                     | 8461  | 2200 | ( 26.0 ) |                 |                                       |                 |                                       |
| Indeterminate Vaccination (0-13 days post dose)             | 81    | 15   | ( 18.5 ) | 35              | ( -14 - 63 )                          | 25              | ( -37 - 59 )                          |
| Fully Vaccinated (14-27 days post dose)                     | 119   | 8    | ( 6.7 )  | 79              | ( 58 - 90 )                           | 67              | ( 30 - 84 )                           |
| Fully Vaccinated (28-41 days post dose)                     | 99    | 6    | ( 6.1 )  | 82              | ( 58 - 92 )                           | 80              | ( 52 - 92 )                           |
| Fully Vaccinated (42-55 days post dose)                     | 81    | 7    | ( 8.6 )  | 73              | ( 41 - 88 )                           | 58              | ( 5 - 81 )                            |
| Fully Vaccinated ( $\geq 56$ days post dose)                | 157   | 8    | ( 5.1 )  | 85              | ( 69 - 93 )                           | 87              | ( 71 - 94 )                           |

<sup>1</sup>Adjusted model using inverse propensity weights, calculated using strata specific data, in regression doubly accounting for calendar time, daily virus circulation, age, and geographic cluster.

<sup>2</sup>Not Calculated due to no breakthrough cases.

**Section S2. Supplemental Figures Referenced in the Main Manuscript**

Figures\_S1-S10: Epi-curves with local percent positivity by Partner Sites

Figure S1: Hospital admission for all adults with a COVID-like illness in analytic sample from COLUMBIA UNIVERSITY, with local percent positivity by date

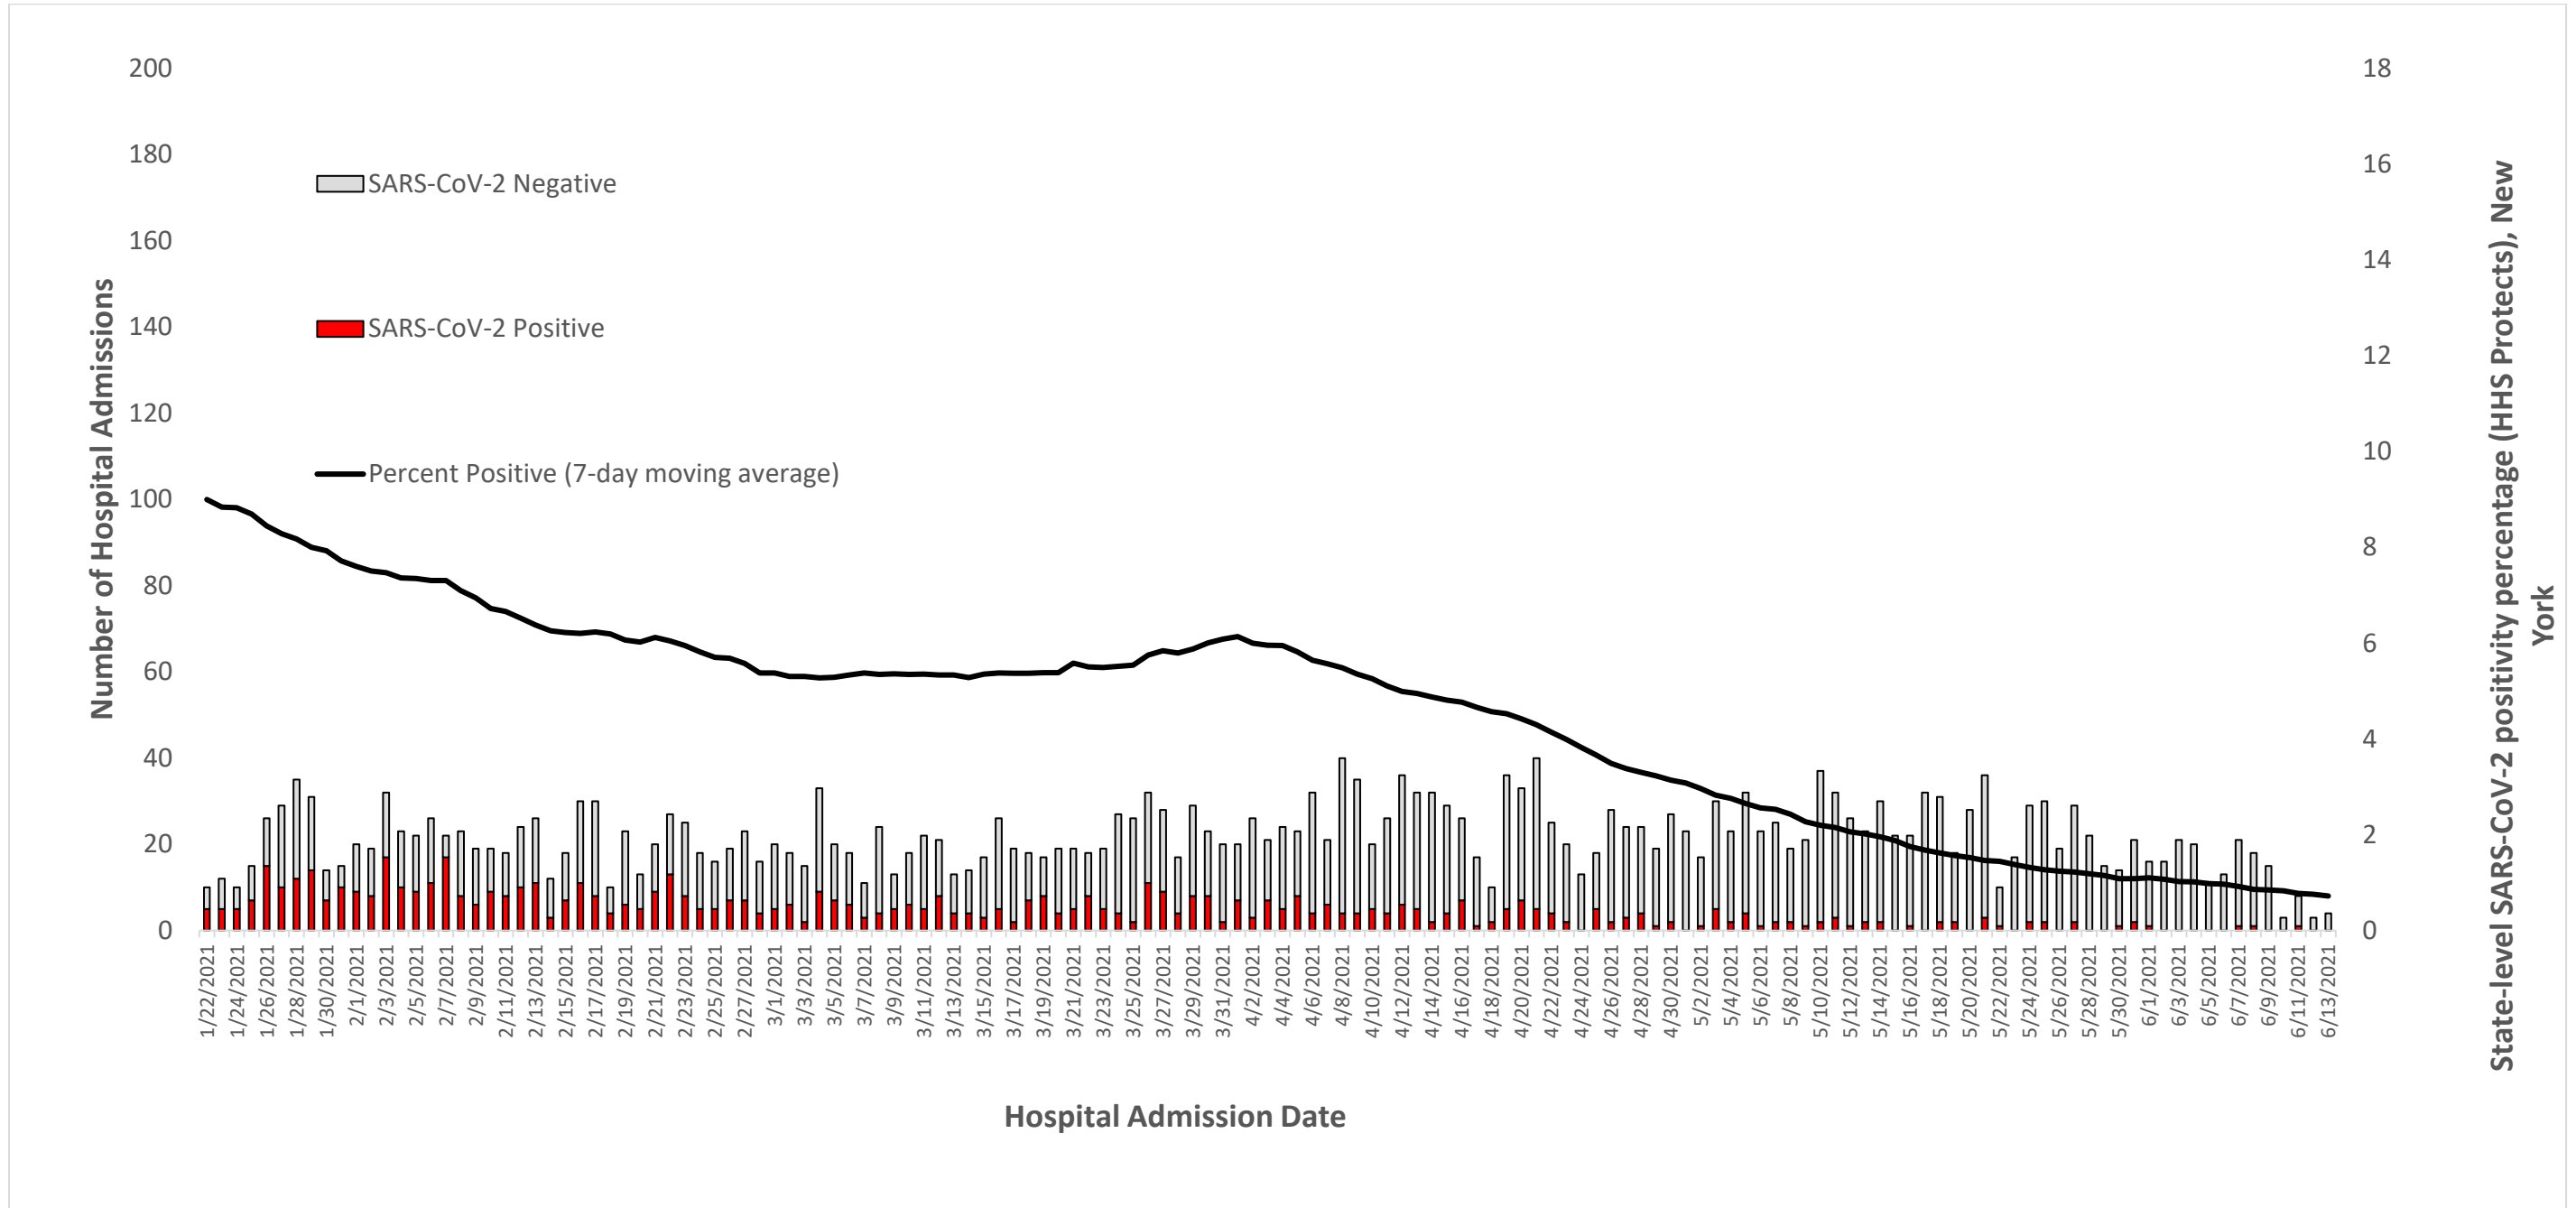

Footnote: For Columbia University Irving Medical Center, hospitalizations starting on January 22 were included in the analytic sample, reflecting hospitalizations among patients in at least one age group that occurred 14 days after the date of local vaccine availability.

Figure S2: Hospital admission for all adults with a COVID-like illness in analytic sample from HEALTHPARTNERS, with local percent positivity by date

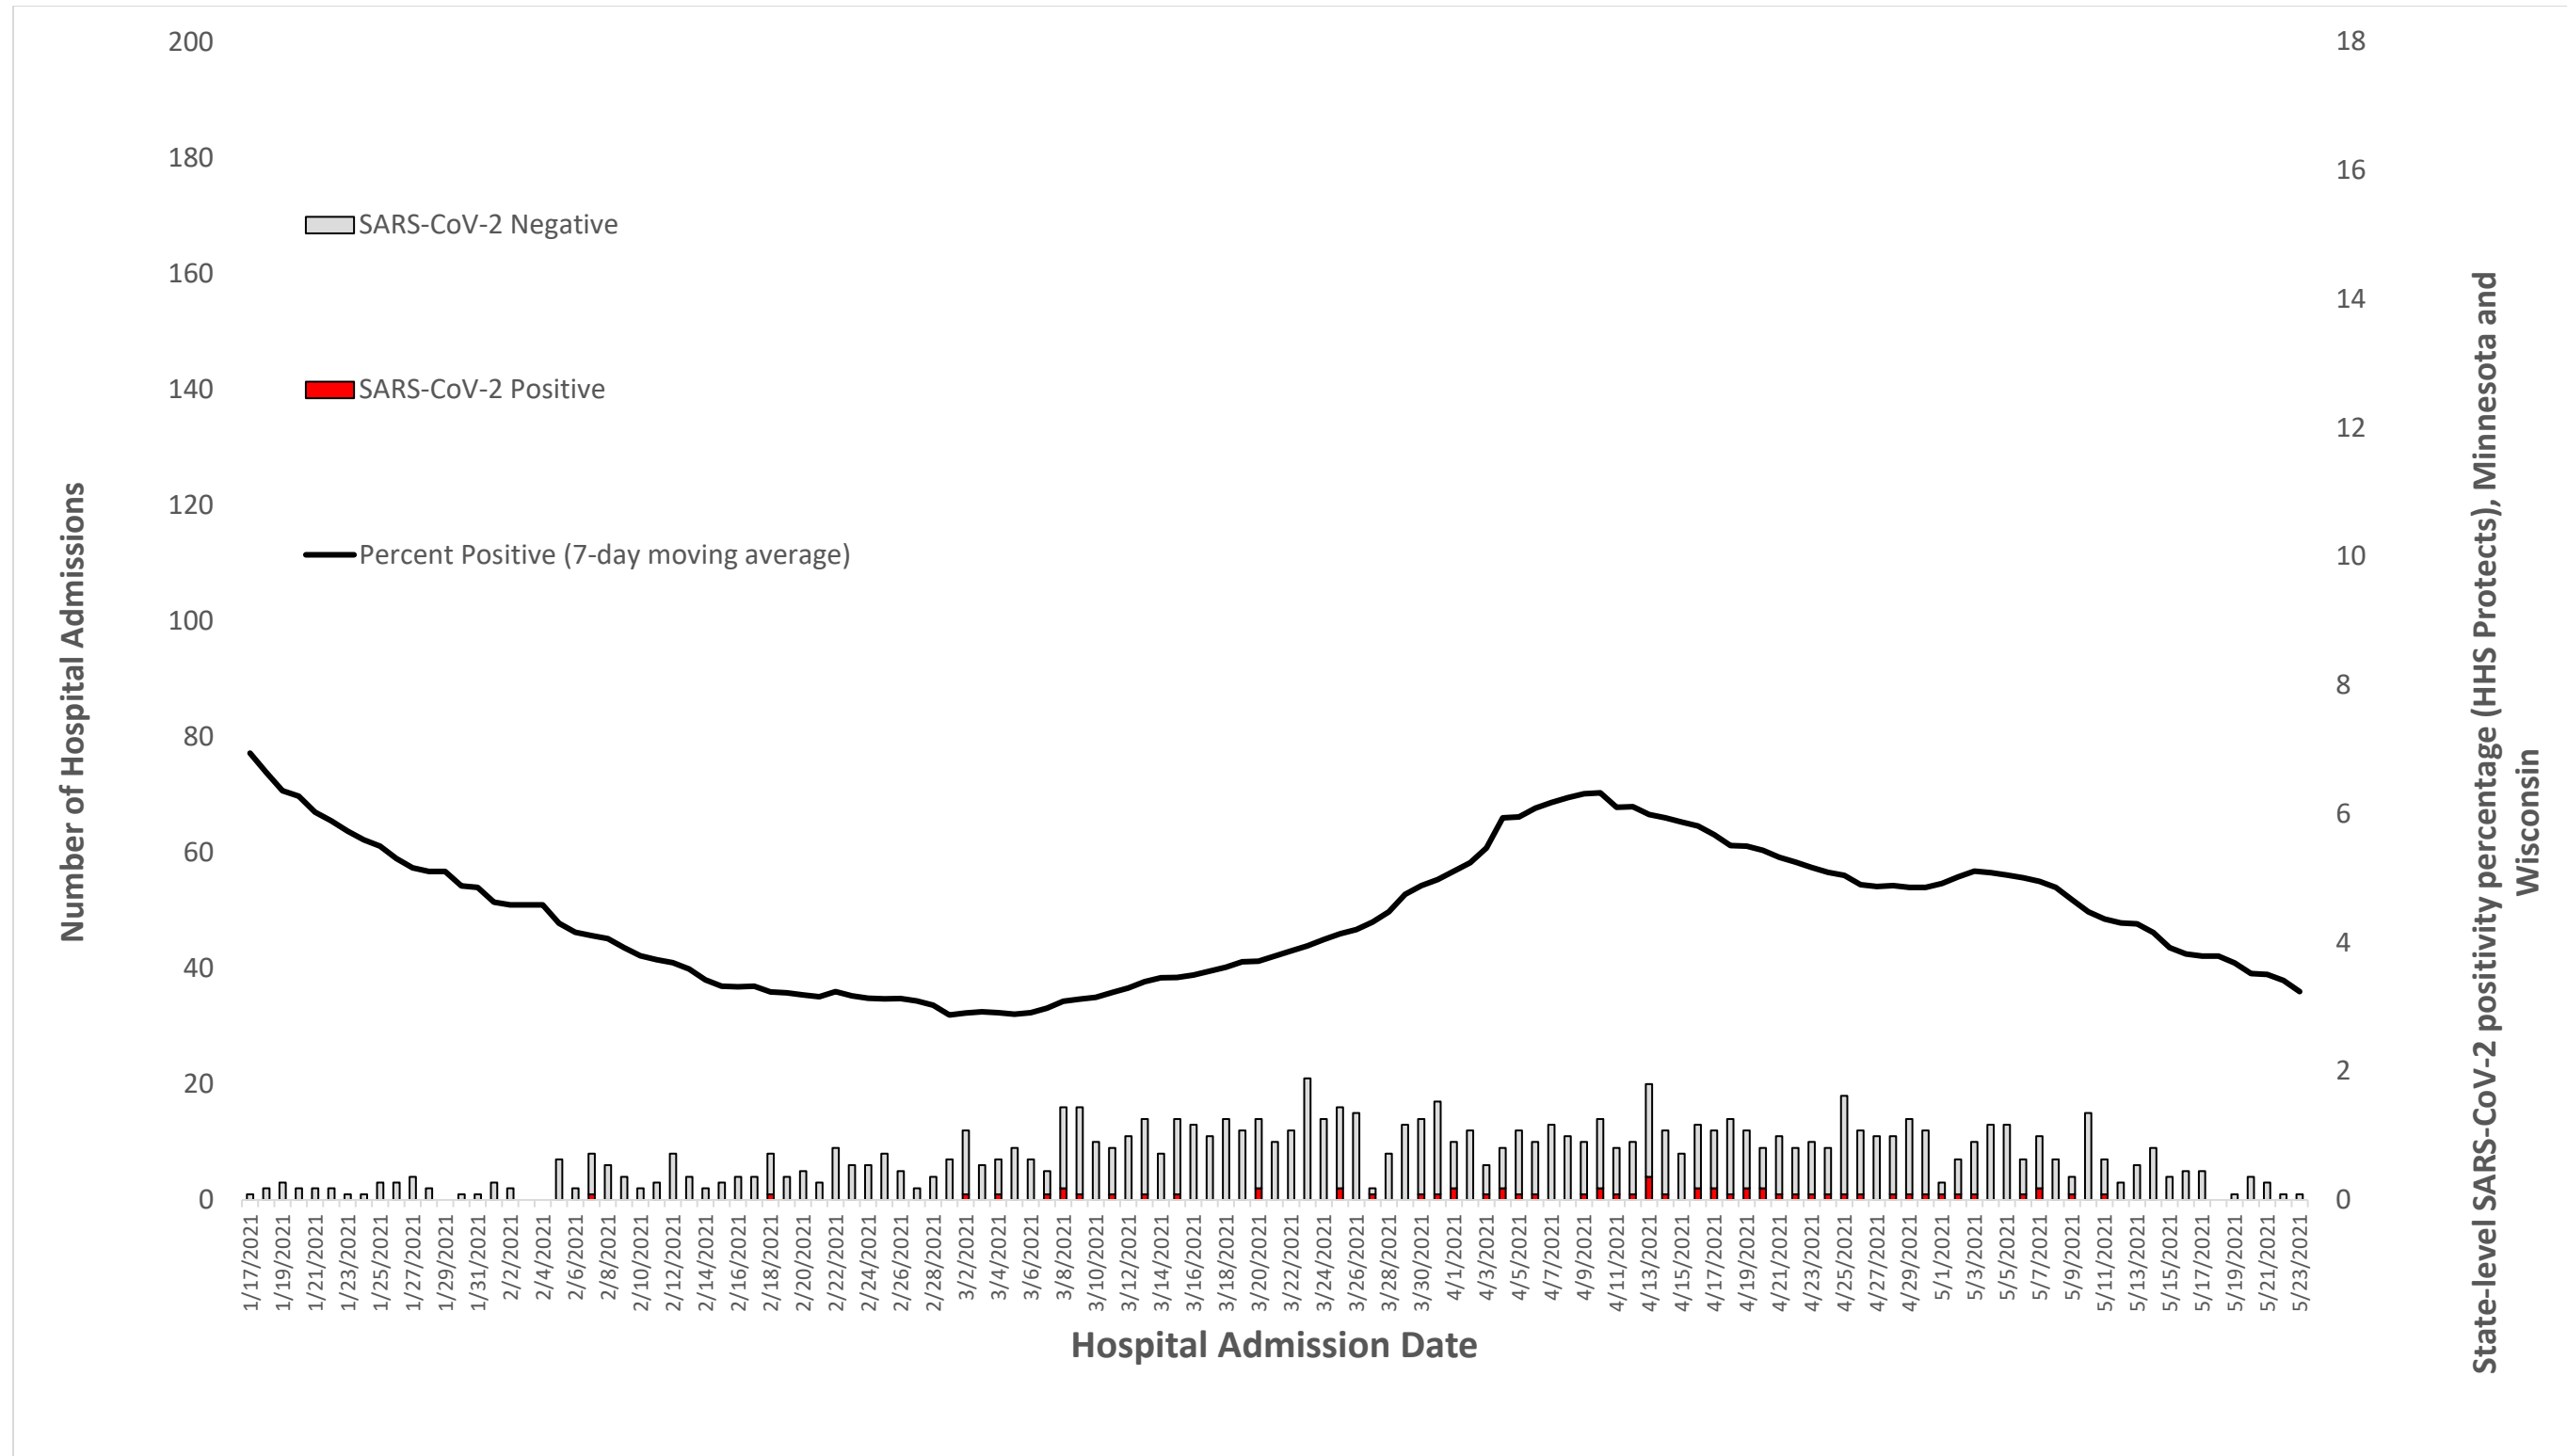

Footnote: For HealthPartners, hospitalizations starting on January 17 were included in the analytic sample, reflecting hospitalizations among patients in at least one age group that occurred 14 days after the date of local vaccine availability.



**Figure S3: Hospital admission for all adults with a COVID-like illness in analytic sample from INTERMOUNTAIN HEALTHCARE, with local percent positivity by date**

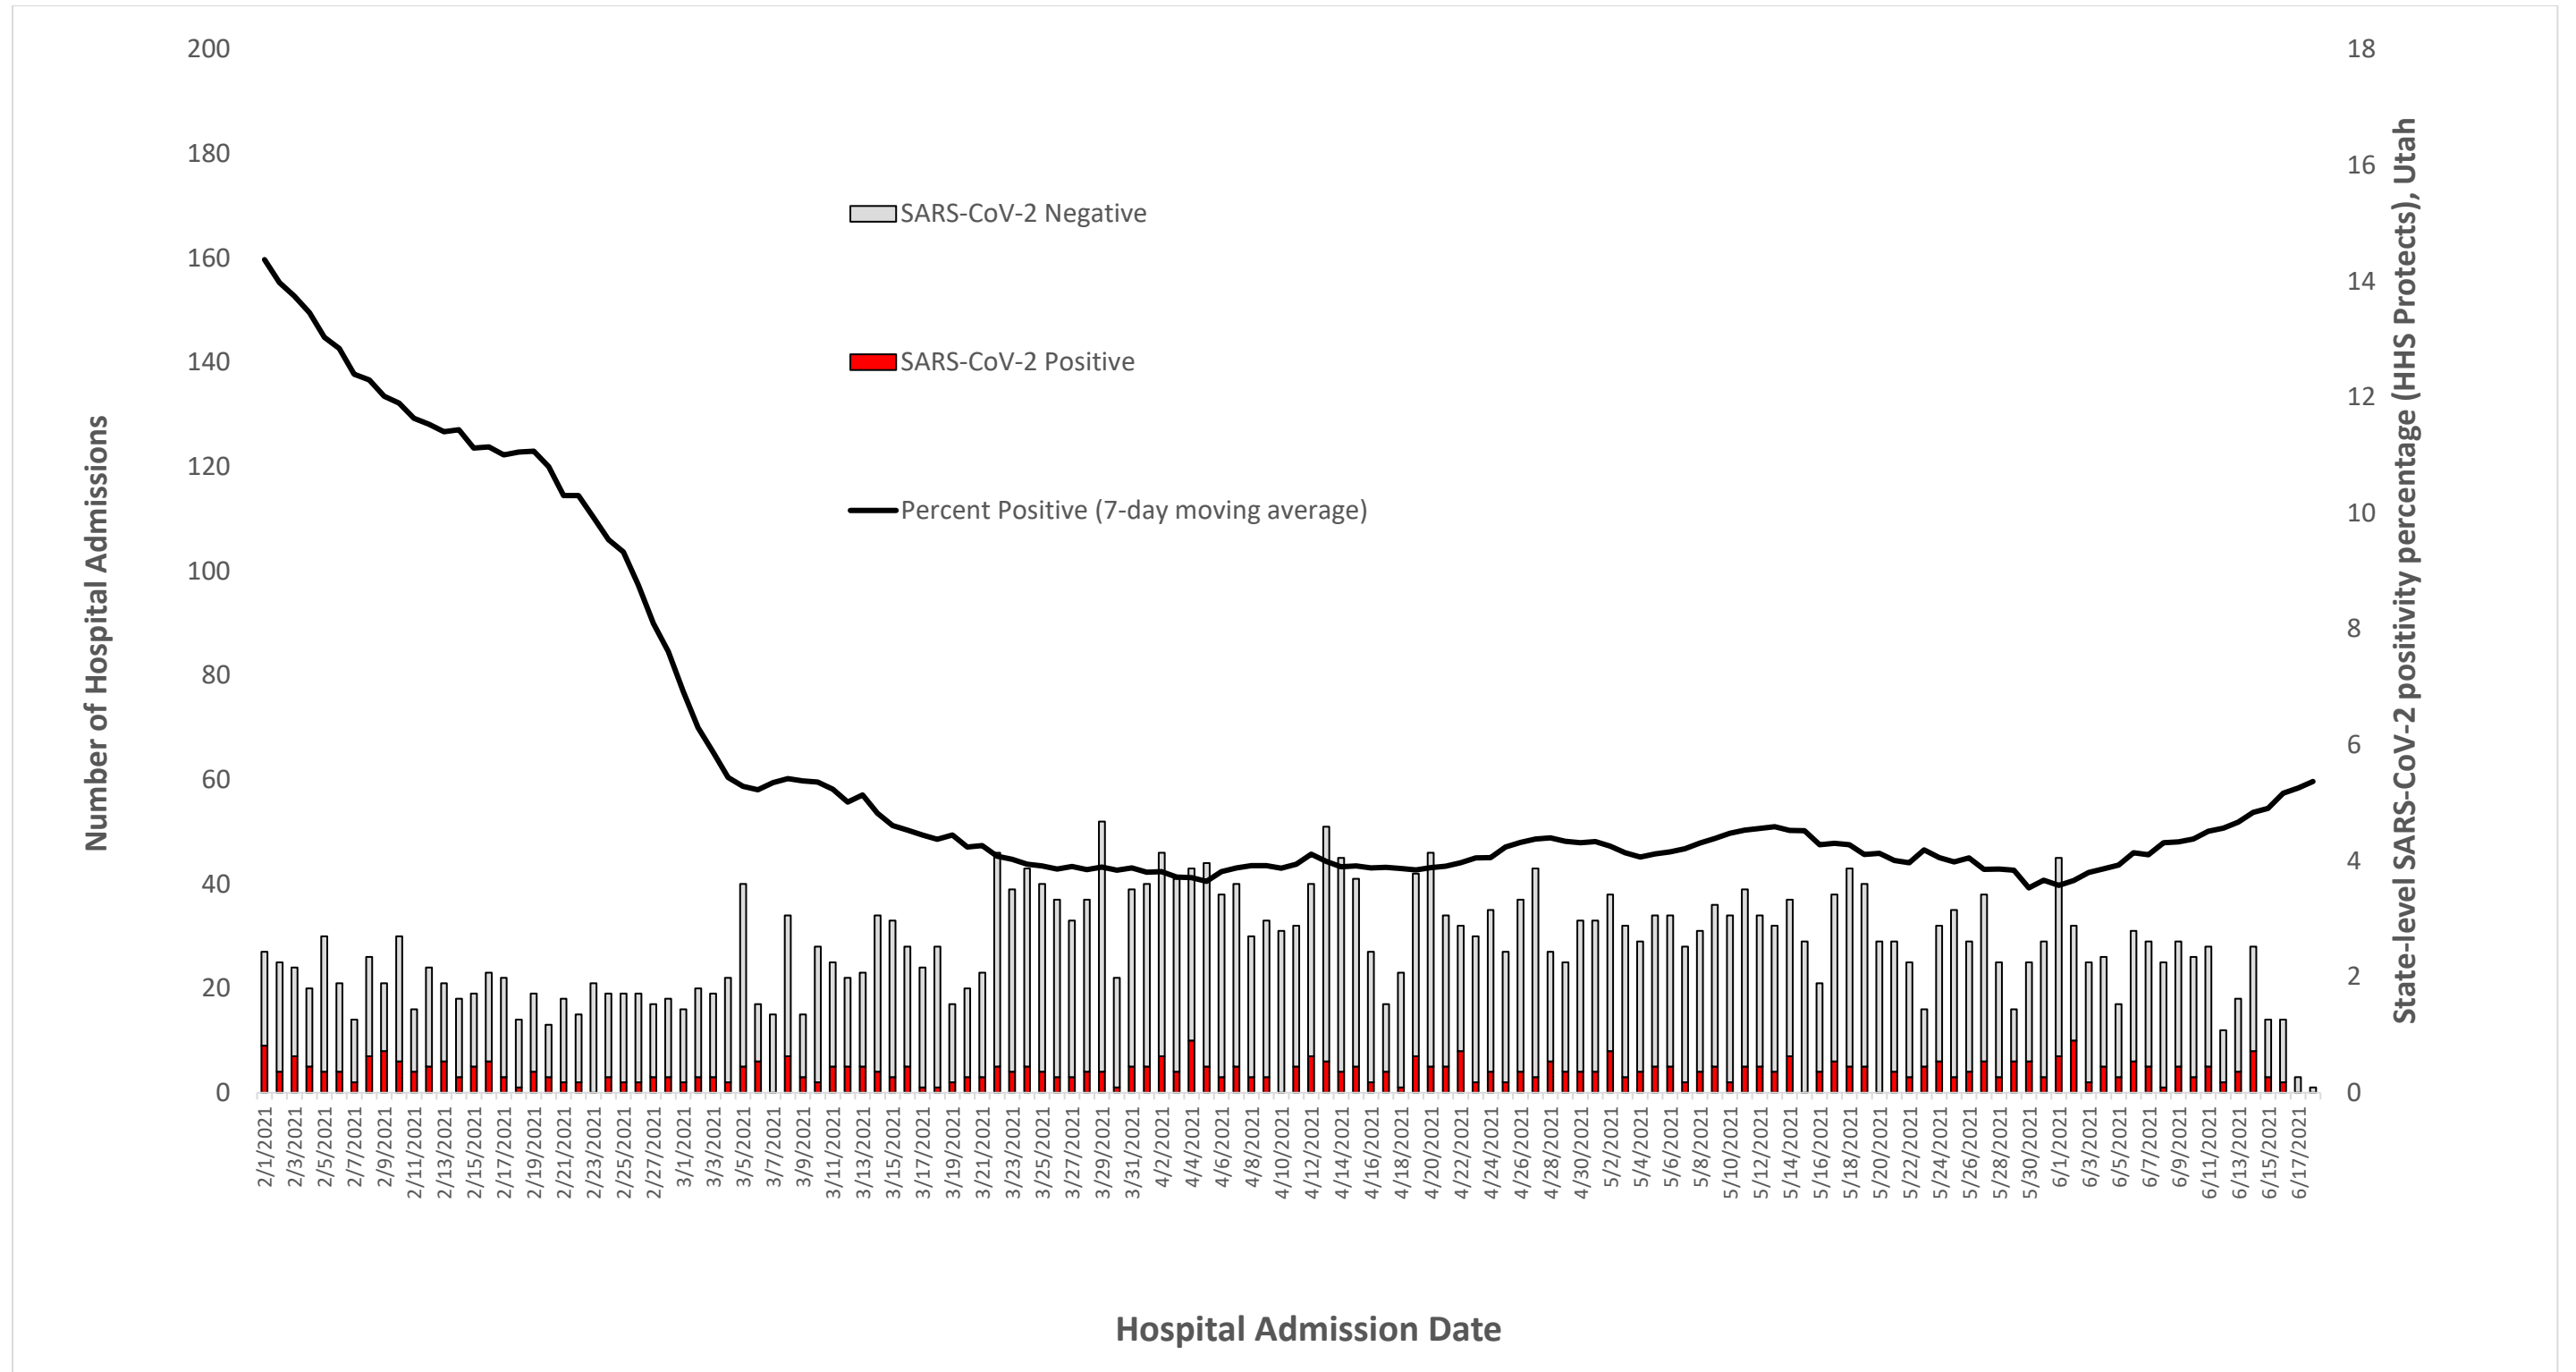

Footnote: For Intermountain Healthcare, hospitalizations starting on February 1 were included in the analytic sample, reflecting hospitalizations among patients in at least one age group that occurred 14 days after the date of local vaccine availability.

**Figure S4: Hospital admission for all adults with a COVID-like illness in analytic sample from KAISER PERMANENTE NORTHERN CALIFORNIA, with local percent positivity by date**

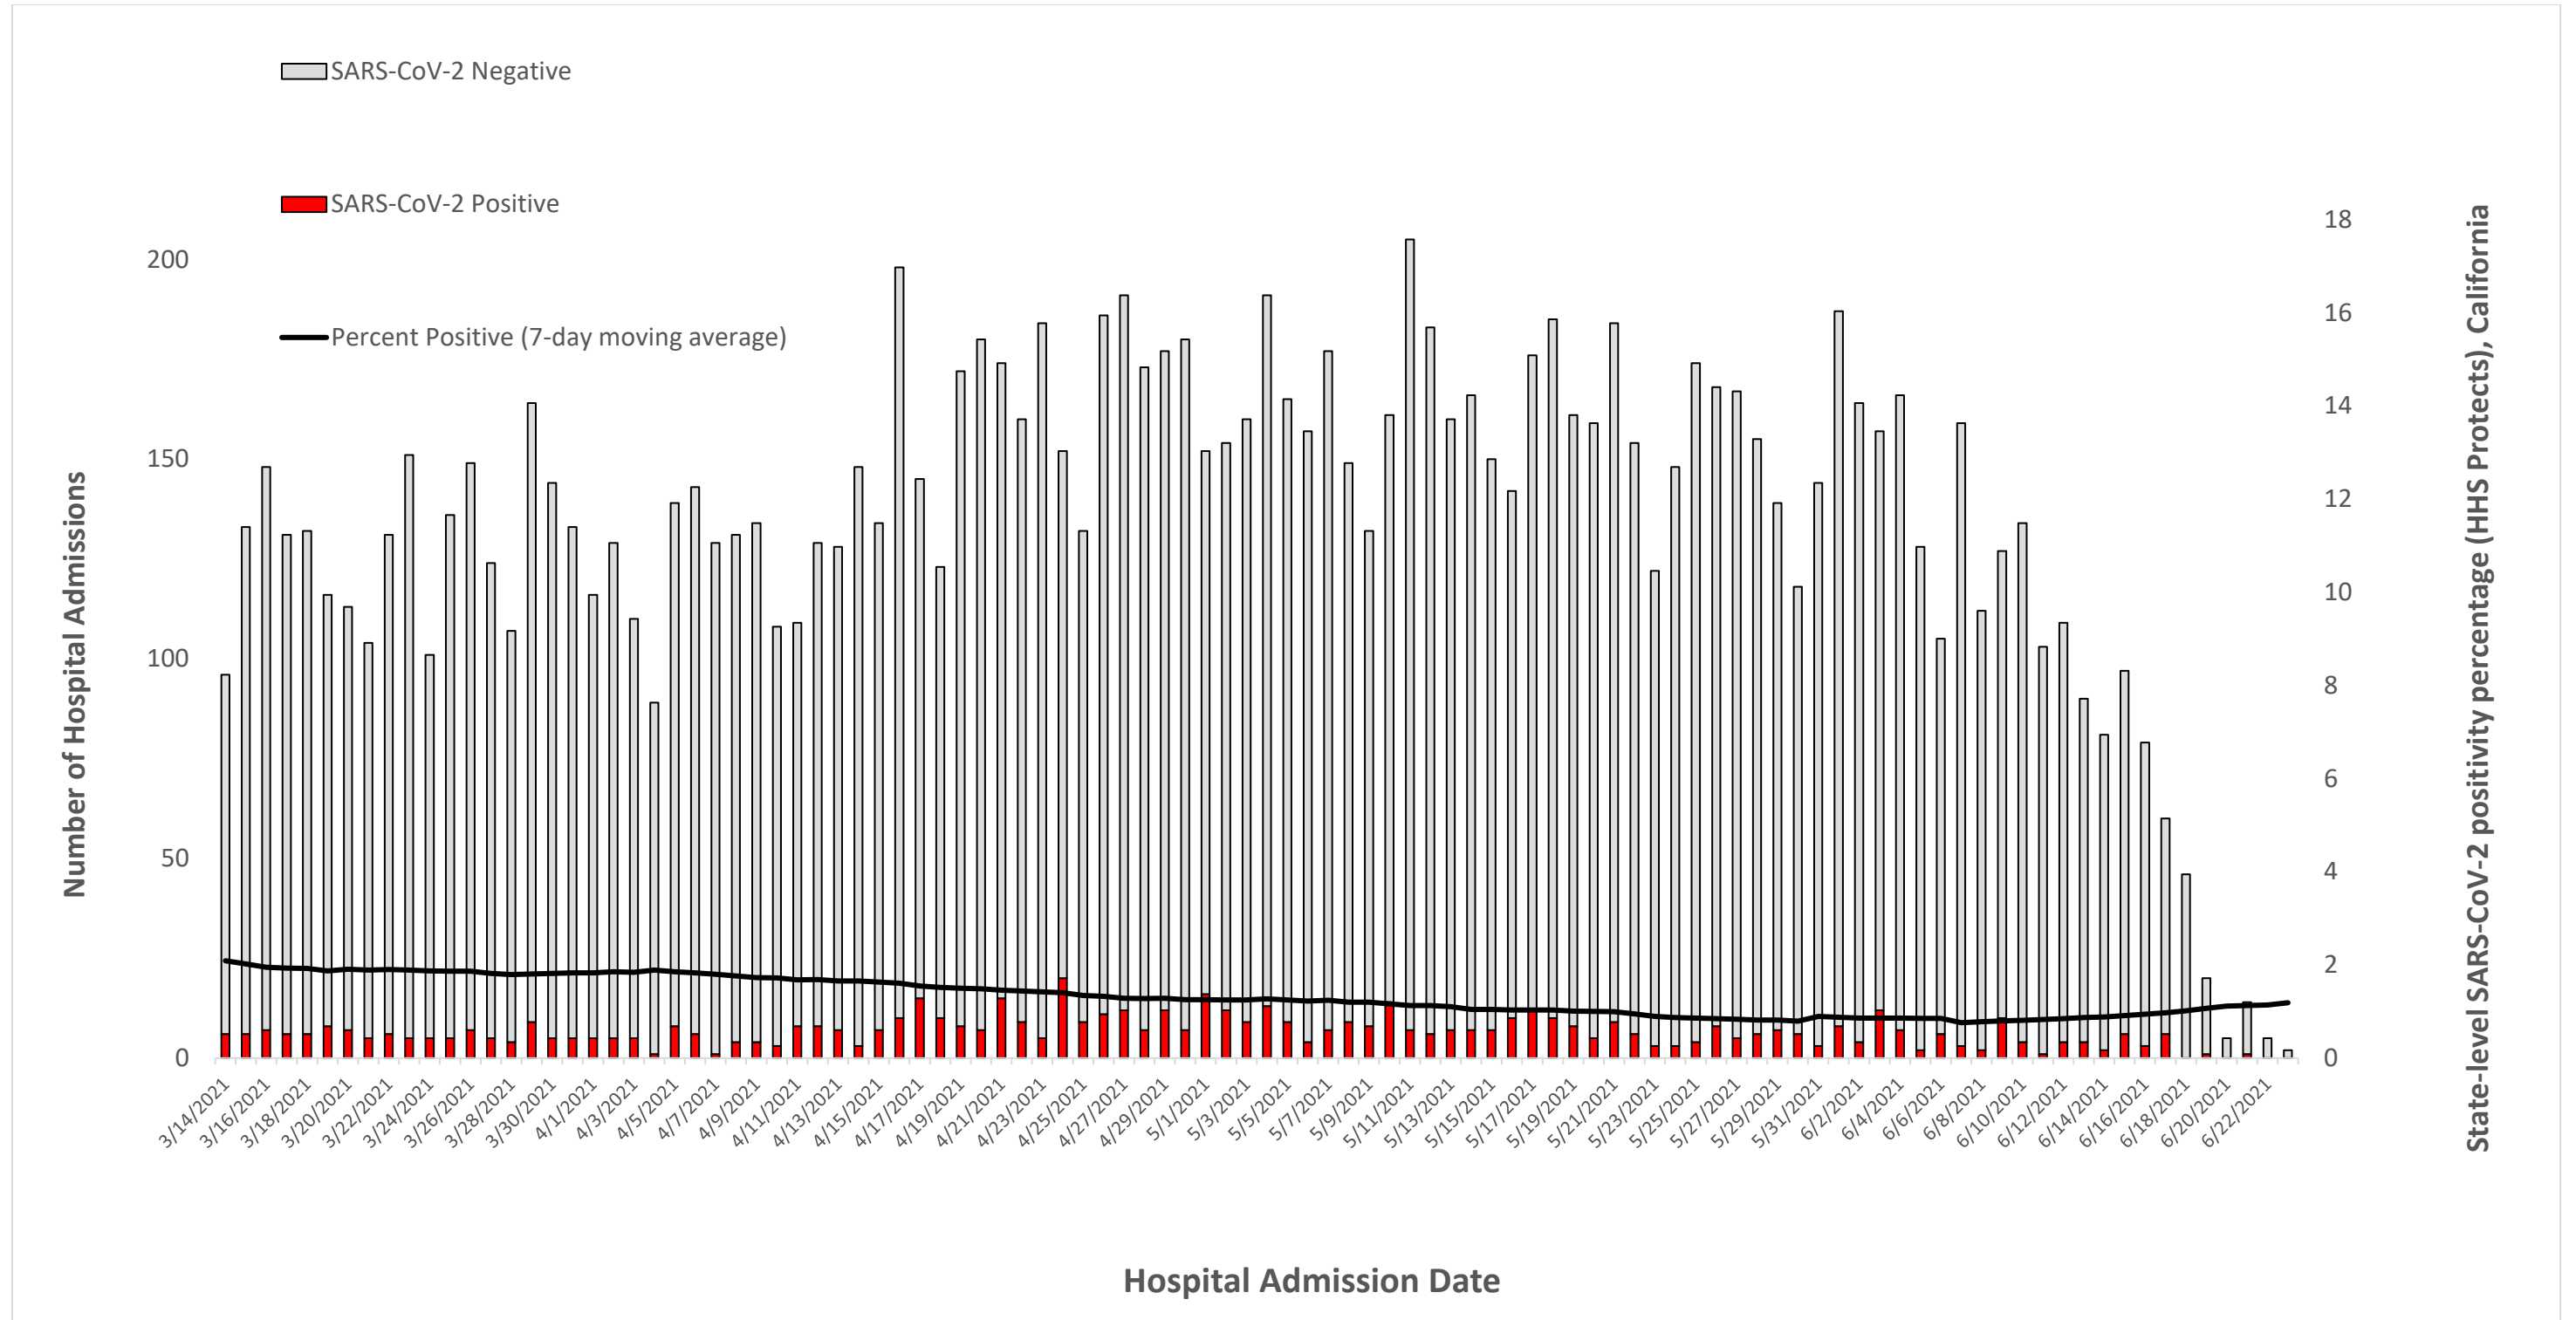

Footnote: For Kaiser Permanente Northern California, hospitalizations starting on March 14 were included in the analytic sample, reflecting hospitalizations among patients in at least one age group that occurred 14 days after the date of local vaccine availability.

**Figure S5: Hospital admission for all adults with a COVID-like illness in analytic sample from KAISER PERMANENTE NORTHWEST, with local percent positivity by date**

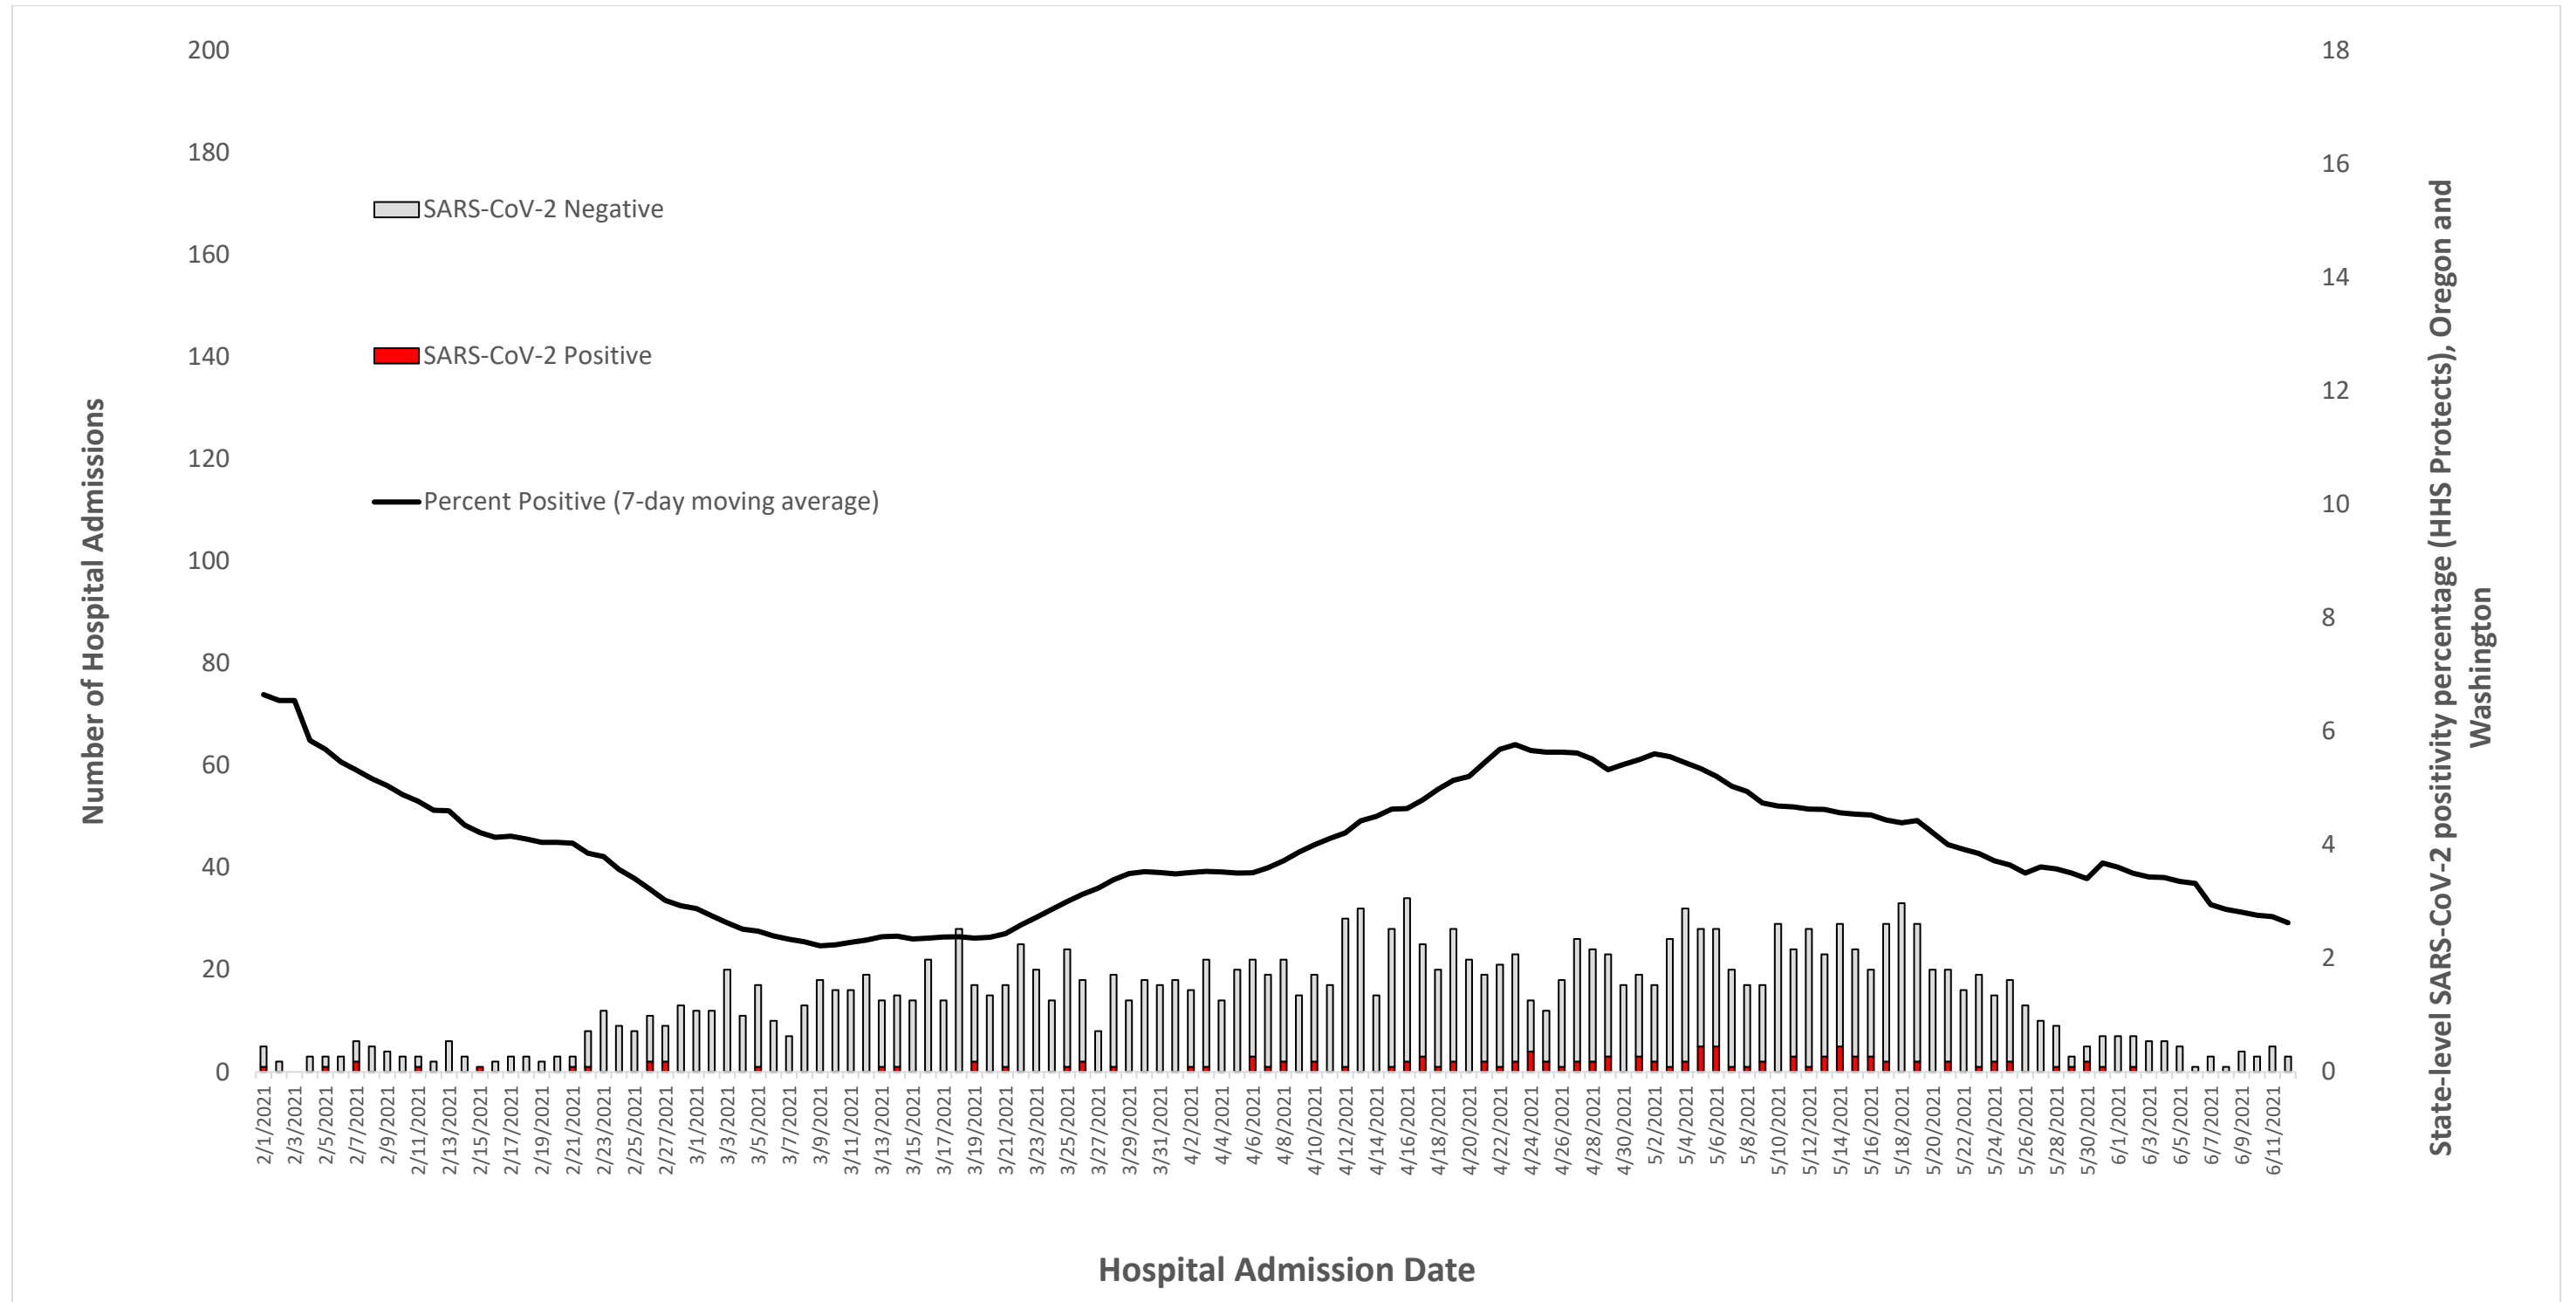

Footnote: For Kaiser Permanente Northwest, hospitalizations starting on February 1 were included in the analytic sample, reflecting hospitalizations among patients in at least one age group that occurred 14 days after the date of local vaccine availability.

Figure S6: Hospital admission for all adults with a COVID-like illness in analytic sample from REGENSTRIEF INSTITUTE, with local percent positivity by date

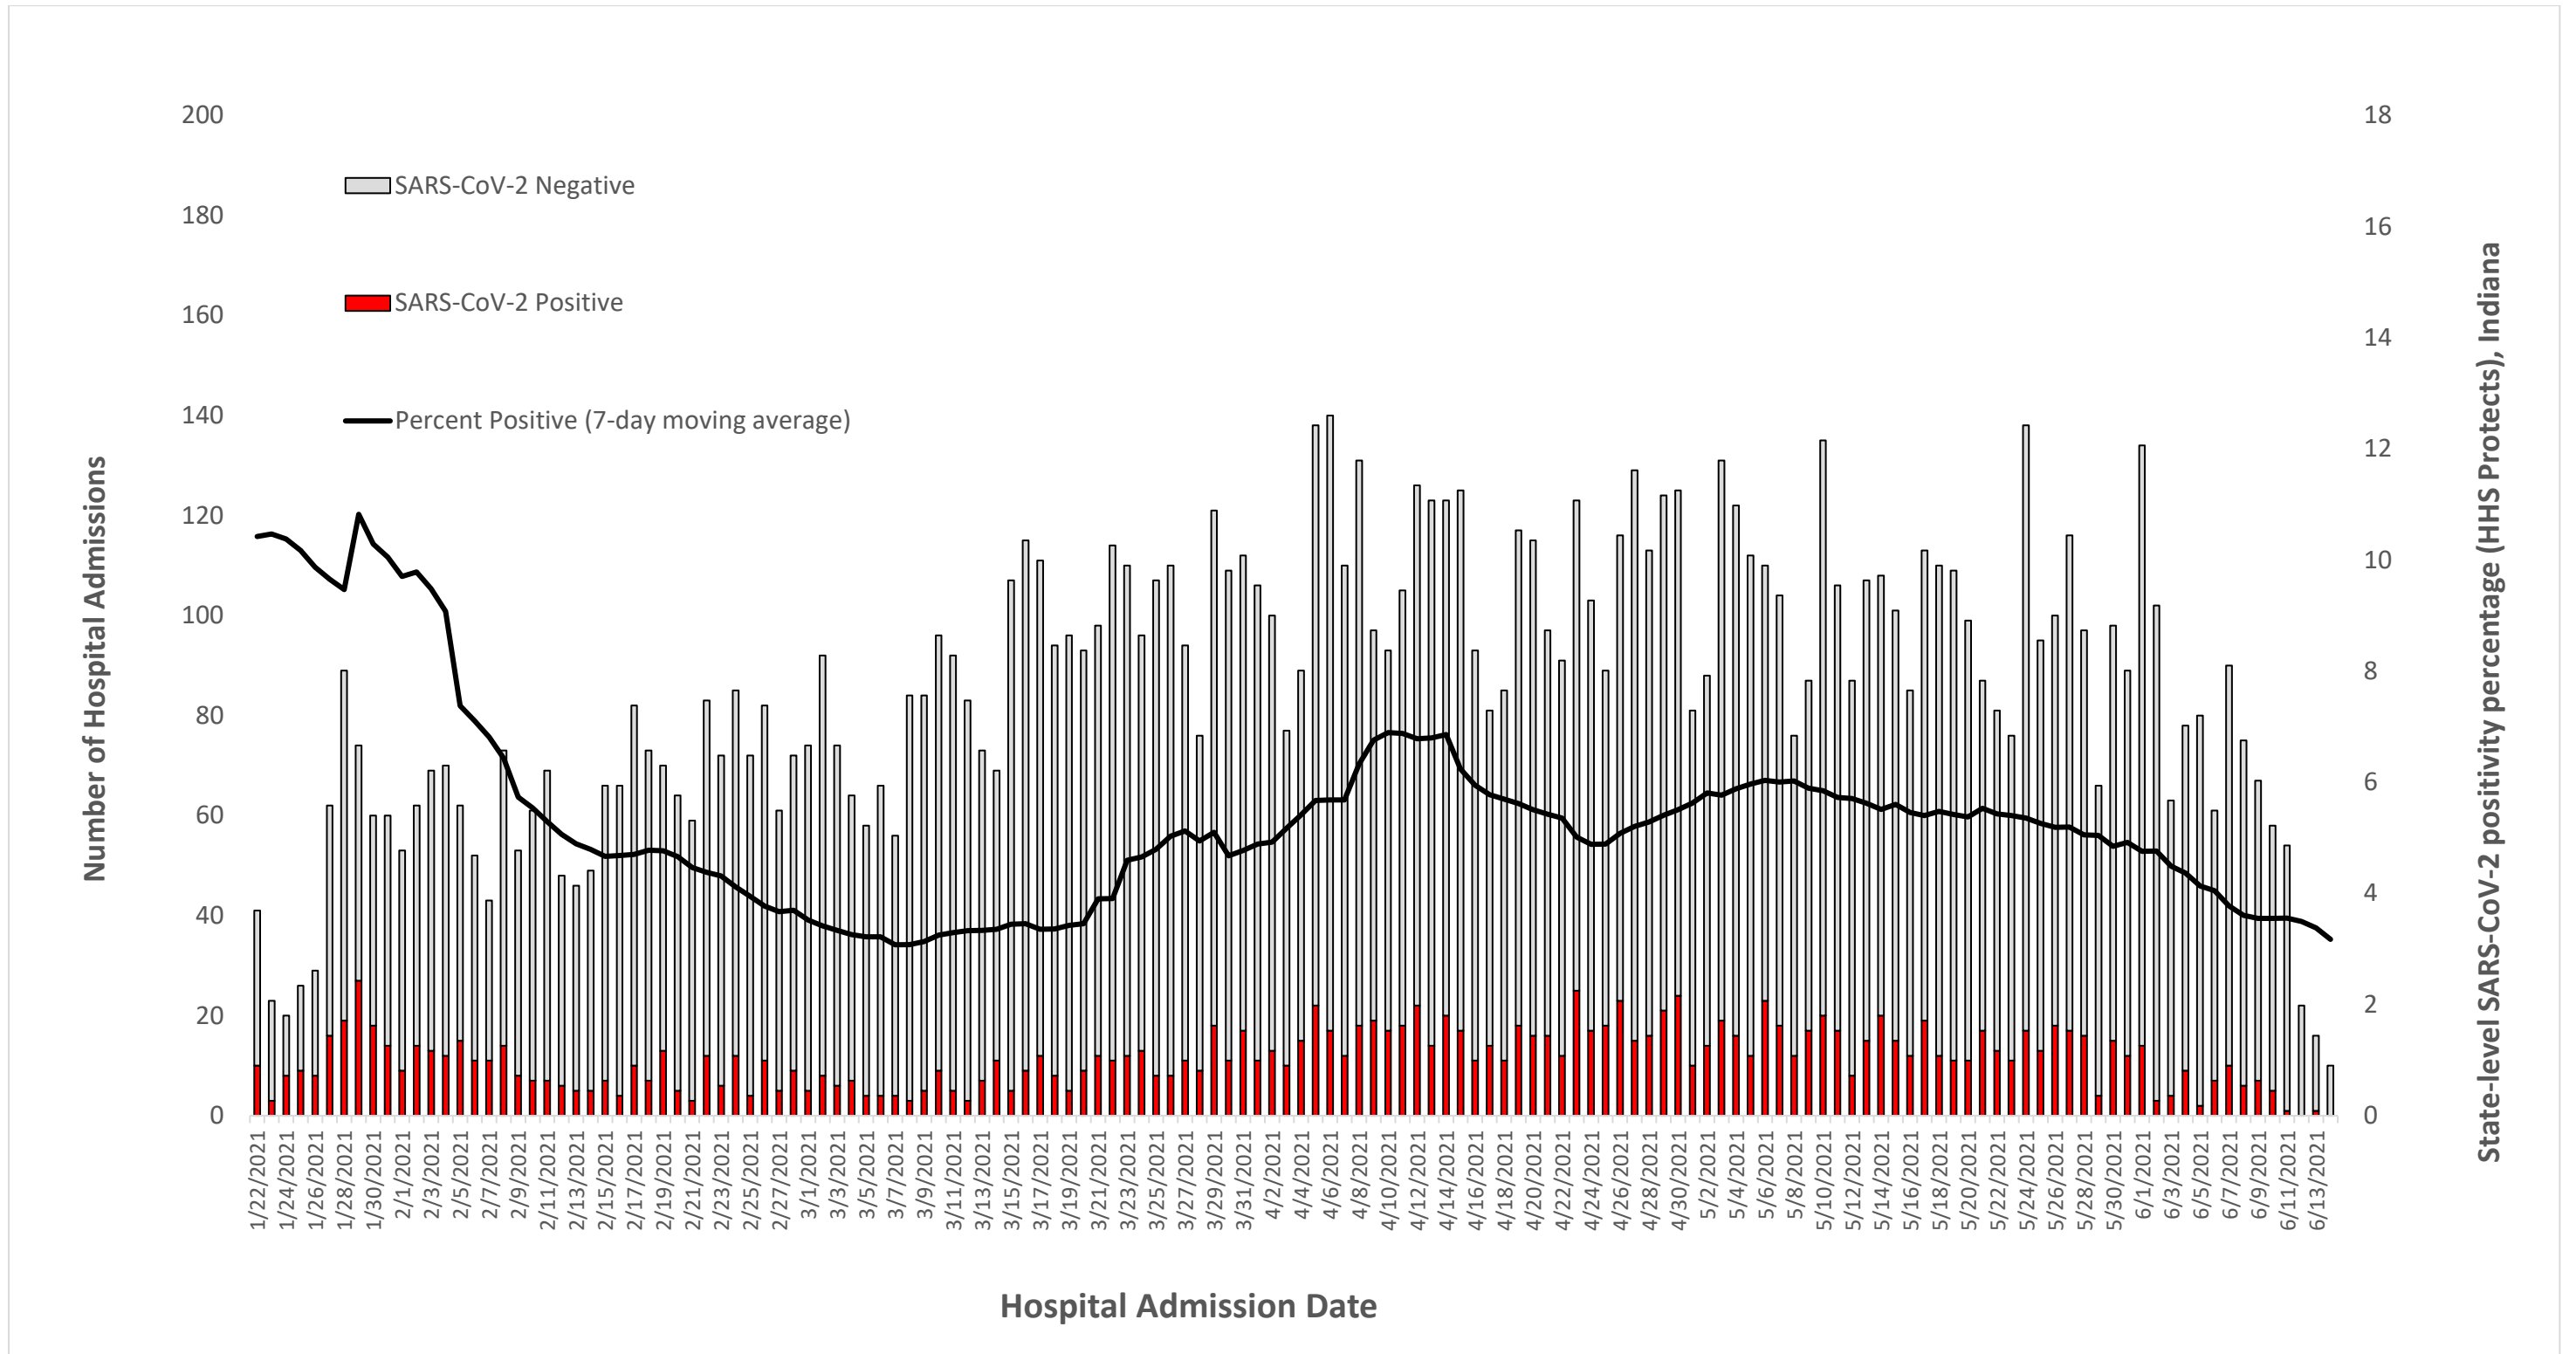

Footnote: For Regenstrief Institute, hospitalizations starting on January 22 were included in the analytic sample, reflecting hospitalizations among patients in at least one age group that occurred 14 days after the date of local vaccine availability.

**Figure S7: Hospital admission for all adults with a COVID-like illness in analytic sample from UNIVERSITY OF COLORADO, with local percent positivity by date**

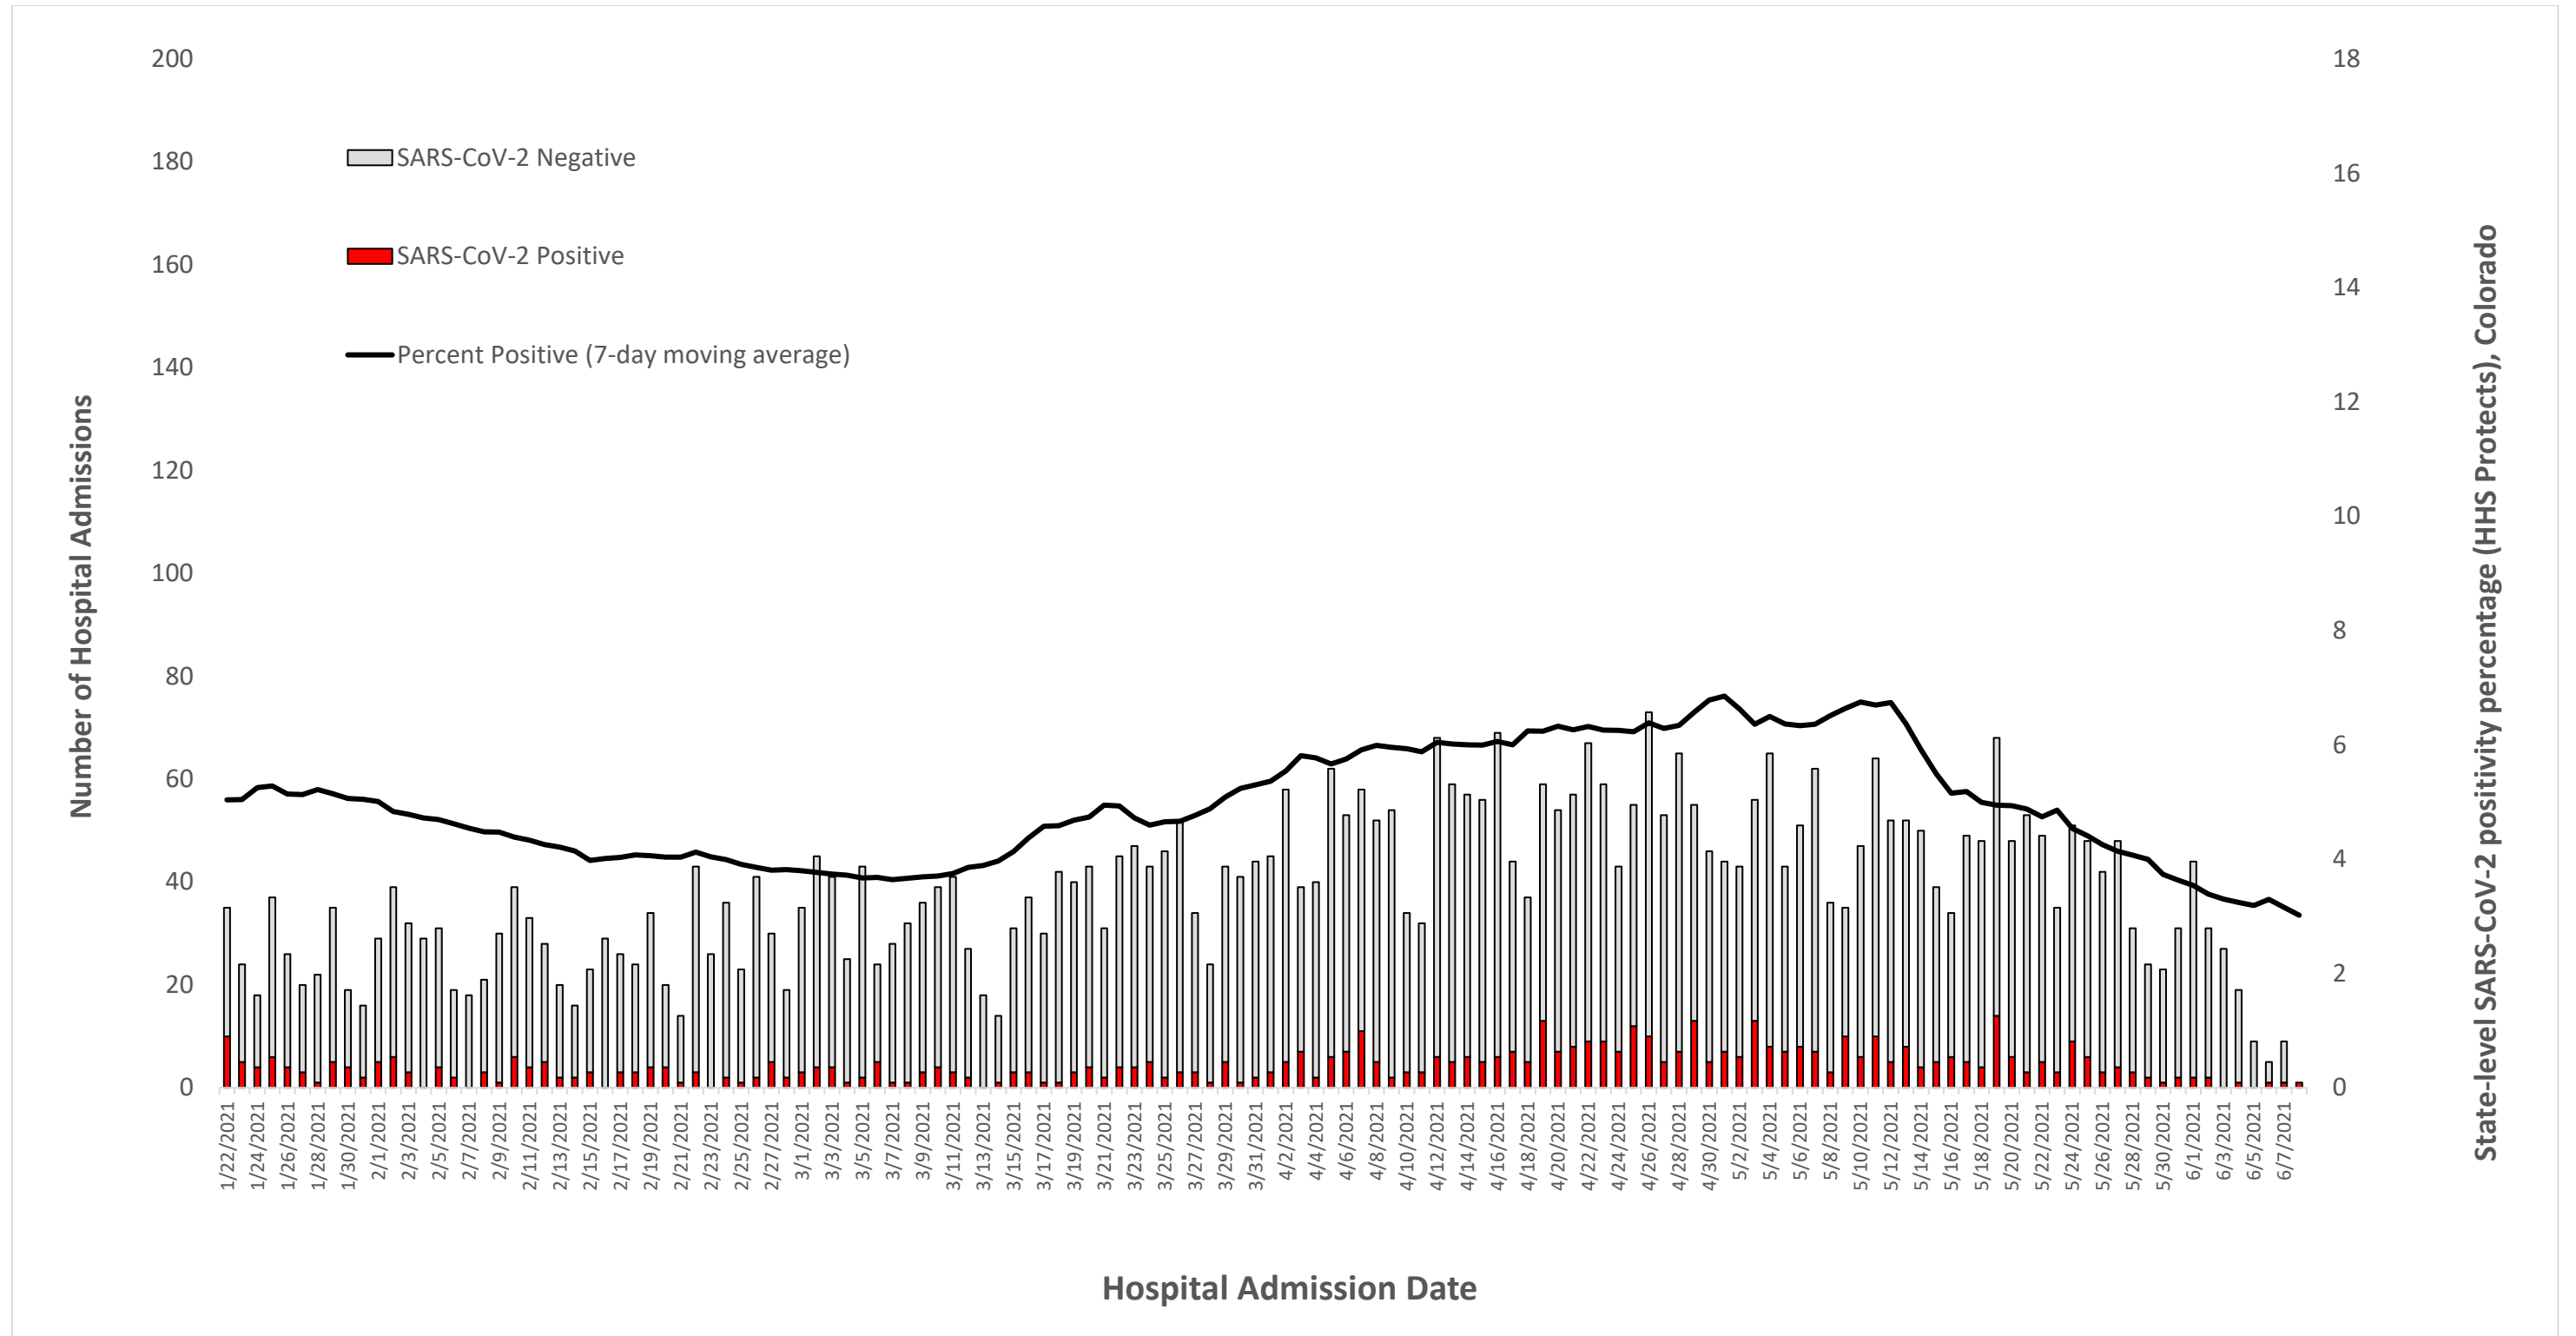

Footnote: For University of Colorado, ED/UC encounters starting on January 22 were included in the analytic sample, reflecting encounters among patients in at least one age group that occurred 14 days after the date of local vaccine availability.

**Figure S8: Emergency department and urgent care (ED/UC) visits for all adults with a COVID-like illness in analytic sample from INTERMOUNTAIN HEALTHCARE, with local percent positivity by date**

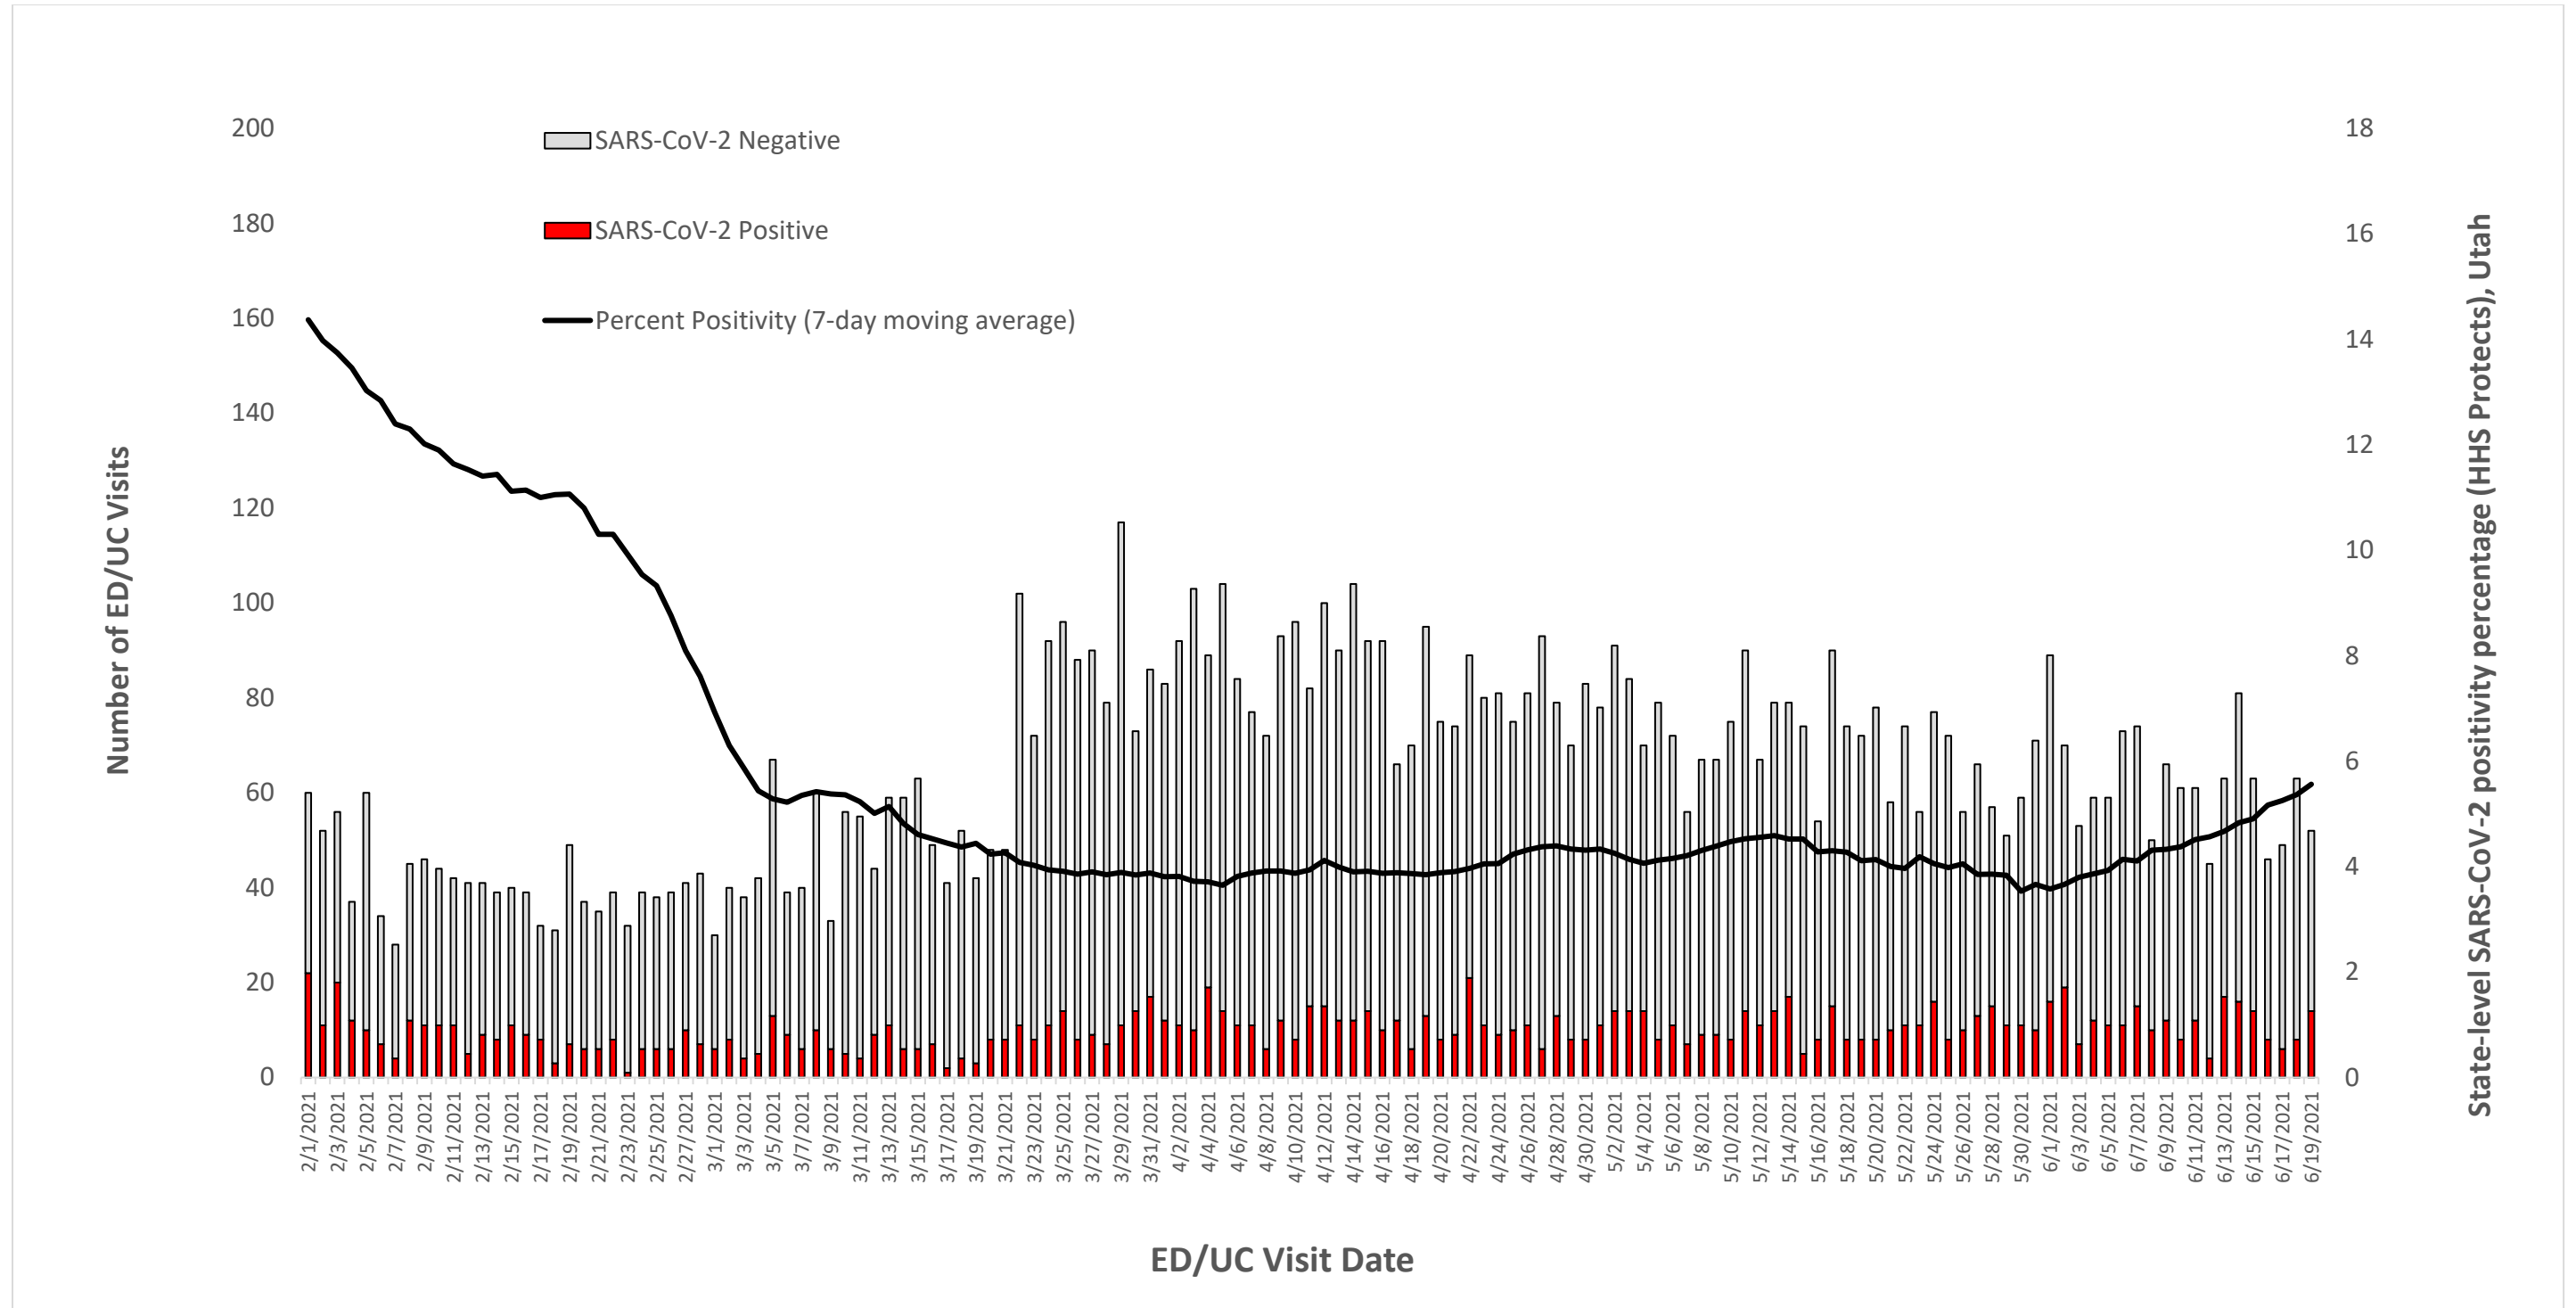

Footnote: For Intermountain Healthcare, ED/UC encounters starting on February 1 were included in the analytic sample, reflecting encounters among patients in at least one age group that occurred 14 days after the date of local vaccine availability.

**Figure S9: Emergency department and urgent care (ED/UC) visits for all adults with a COVID-like illness in analytic sample from KAISER PERMANENTE NORTHWEST, with local percent positivity by date**

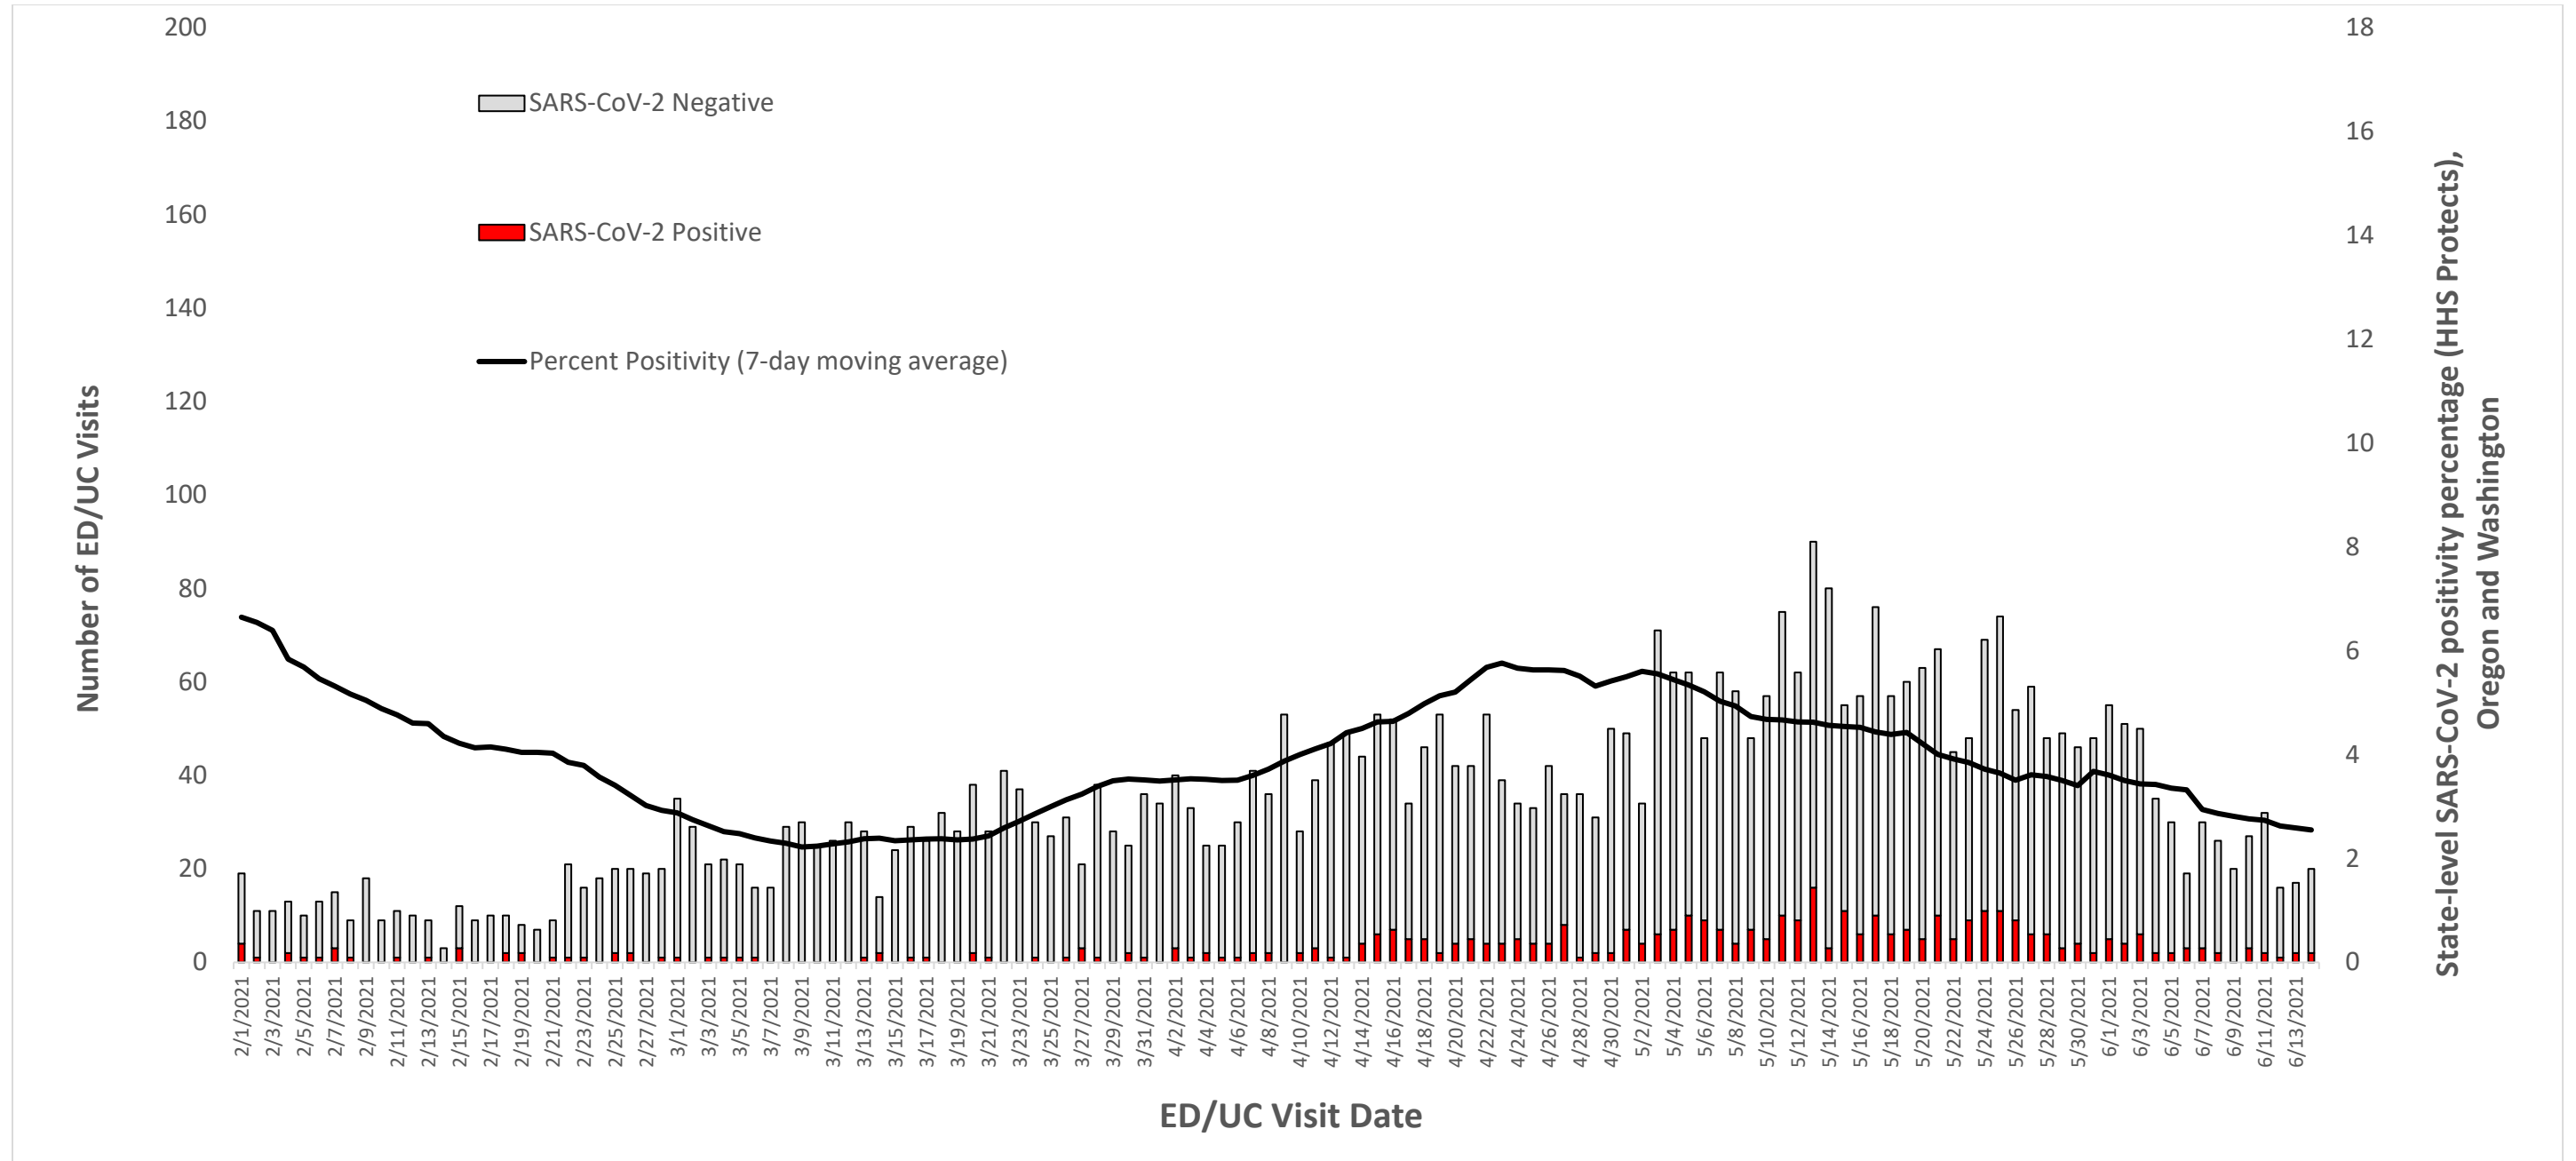

Footnote: For Kaiser Permanente Northwest, ED/UC encounters starting on February 22 were included in the analytic sample, reflecting encounters among patients in at least one age group that occurred 14 days after the date of local vaccine availability.

**Figure S10: Emergency department and urgent care (ED/UC) visits for all adults with a COVID-like illness in analytic sample from REGENSTRIEF INSTITUTE, with local percent positivity by date**

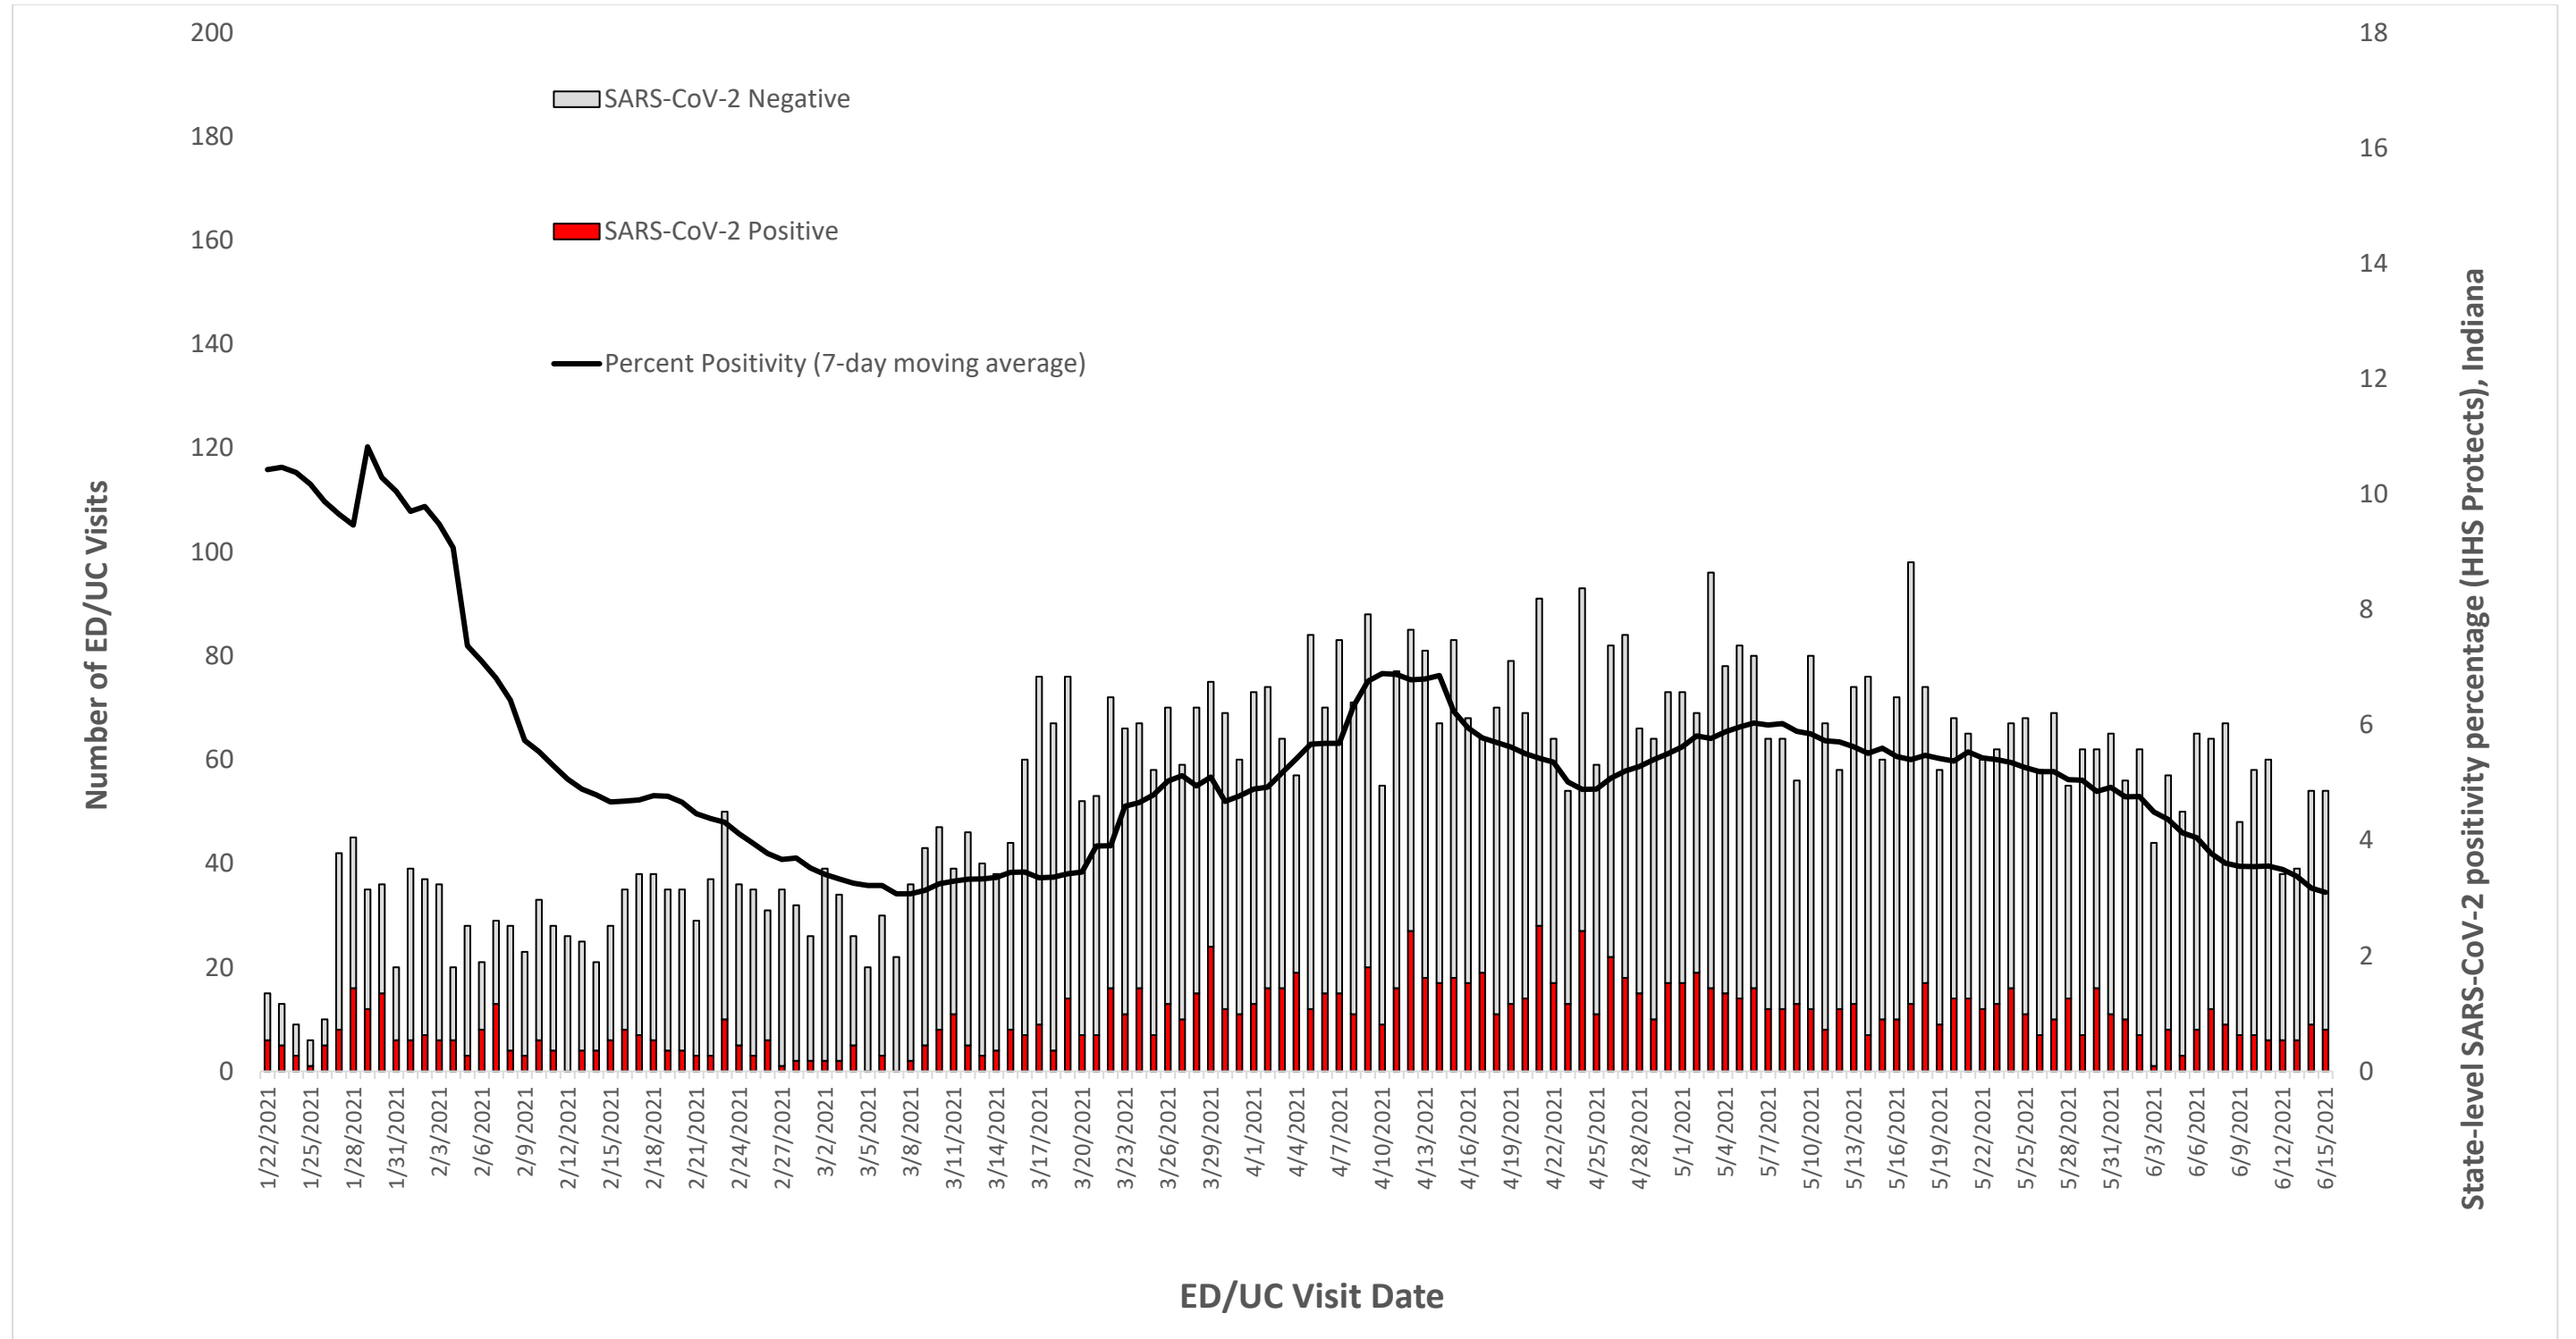

Footnote: For Regenstrief Institute, ED/UC encounters starting on January 22 were included in the analytic sample, reflecting encounters among patients in at least one age group that occurred 14 days after the date of local vaccine availability



**Section S3. Supplemental Methods**

**A. Study Design:****1. Inclusion/Exclusion criteria**

Medical encounters that occurred since January 1, 2021 were initially identified, and exclusions were then applied to ultimately obtain the analytic population of interest. The inclusion criteria were medical encounters among adults (aged  $\geq 50$  years) with a qualified COVID-like illness (CLI) diagnosis, a positive or negative result from a molecular SARS-CoV-2 laboratory test within the 14 days before and up to 72-hours after the hospital admission or Emergency Department or Urgent Care (ED/UC) encounter, and an opportunity to be at least partially vaccinated on the index date (defined as 14 days after the partner-specific date of when vaccines became widely available to adults in each age group). Hospitalizations were excluded if they lasted  $< 24$  hours. Medical events were excluded if they occurred prior to age-specific inclusion dates within a partner's catchment area or if the days from discharge were less than the lag time for vaccine record update. Data from hospital readmissions within 30 days of a previous hospital discharge, repeat ED encounters within 24 hours, and repeat UC encounters within 24 hours were combined and analyzed as single medical encounters. ED/UC encounters that resulted in hospitalization were considered as separate medical encounters because data for encounters across multiple settings were not consistently linked together and in order to also capture ED/UC encounters regardless of whether they resulted in hospitalization. Medical events were also excluded if no molecular SARS-CoV-2 testing was performed within 14 days to 72-hours after admission or if they occurred in patients who received a first dose of a COVID-19 vaccine  $< 14$  days prior to the index medical event date.

## 2. Outcome definition

The outcome of interest is laboratory-confirmed SARS-CoV-2 CLI-associated medical event, which is based on clinical testing and clinical diagnosis.

Qualified clinical tests for SARS-CoV-2 were real-time reverse transcription polymerase chain reaction (RT-PCR) and molecular assays. Patients tested using only a non-molecular assay (e.g., rapid SARS-CoV-2 antigen test) were excluded. We defined a clinical testing window to capture tests that occurred within 14 days before and up to 72-hours after the hospital admission or ED/UC encounter date. The following hierarchy was used if multiple tests occurred in the 17-day window. Positive results took precedence over negative test results. If multiple concordant test results were available within the 17-day window, the result closest to the hospitalization was preferred (particularly if the test occurred before the encounter). If multiple test types were associated with a given encounter, molecular assay results (e.g., RT-PCR) were preferred over rapid molecular assays. In addition, each test could have up to three associated dates, and if more than one date was available, the following hierarchy was applied: 1) date of specimen collection, 2) date the test was performed, and 3) date of available test results. Ultimately, the index date for each medical event was defined as the date of the most recent positive or negative result from a molecular assay prior to the medical event or the date of the medical event if testing only occurred within 72-hours after the admission or encounter date.

A qualified CLI diagnosis was defined as the presence of  $\geq 1$  ICD code either at hospital discharge or associated with the ED/UC medical event for the following diagnostic categories or signs and symptoms of acute illness: COVID-19 disease, pneumonia (etiology types included

COVID-19, influenza, other viral, and bacterial/other), influenza disease, acute respiratory distress syndrome, chronic obstructive pulmonary disease exacerbation, asthma exacerbation, respiratory failure, other acute lower respiratory tract infections, acute and chronic sinusitis, acute upper respiratory tract infections, and signs and symptoms of acute febrile, respiratory, and non-respiratory illness. Table S2 lists the disease conditions defined as a qualified CLI diagnosis and corresponding ICD-9 and -10 codes.

Based on these two criteria, a COVID-19 case was defined by the presence of  $\geq 1$  positive result from a qualified test during the 17-day window and  $\geq 1$  qualified CLI diagnosis either at hospital discharge or associated with the ED/UC medical event. A control was defined as having  $\geq 1$  qualified CLI diagnosis with only negative results from a qualified test.

### 3. COVID-19 Vaccination Status

Vaccination status was defined as fully vaccinated, partially vaccinated, unvaccinated, and indeterminate based on timing of the vaccine receipt relative to the index testing date that categorized the event as SARS-CoV-2 positive or negative. Those with an indeterminate vaccination status were excluded from the analysis. Of note, partial vaccination was further differentiated based on receipt of the first or second dose, as described in the table below.

| <u>Vaccination status</u>      | <u>Vaccine</u>                  | <u>Definition</u>                                                                                                               |
|--------------------------------|---------------------------------|---------------------------------------------------------------------------------------------------------------------------------|
| Fully vaccinated               | Pfizer, Moderna                 | Receipt of second dose in the 2-dose series occurred $\geq 14$ days before the index testing date                               |
|                                | Janssen/Johnson & Johnson (J&J) | Receipt of the first dose occurred $\geq 14$ days before the index testing date                                                 |
| Partially vaccinated – 1 dose  | Pfizer, Moderna                 | No record of a second dose and receipt of first dose in the 2-dose series occurred $\geq 14$ days before the index testing date |
| Partially vaccinated – 2 doses | Pfizer, Moderna                 | Confirmed receipt of 2 doses of vaccine, but the second dose occurred $< 14$ days before the index testing date                 |
| Unvaccinated                   | Pfizer, Moderna and J&J         | No record of any vaccine receipt                                                                                                |
| Indeterminate                  | Pfizer, Moderna and J&J         | Received the first dose of any vaccine $< 14$ days from the index test date                                                     |

## **B. Extracting Percent Positivity Data from HHS Protect**

National laboratory testing data, including data on the state and county level, are available on the password-protected HHS Protect Public Data Hub. Laboratory testing data include viral COVID-19 laboratory test [Reverse Transcription Polymerase chain reaction (RT-PCR)] results from over 1,000 U.S. laboratories and testing locations including commercial and reference laboratories, public health laboratories, hospital laboratories, and other testing locations. Data presented in HHS Protect are representative of diagnostic specimens being tested and reflects the majority of, but not all, COVID-19 testing being conducted in the United States.

For this analysis, daily laboratory data are downloaded from HHS Protect and aggregated to the state and/or county by date of report. The percent positive seven-day moving average is calculated by taking the average of the daily percent positive cases over the past seven days. The percent positive for each site-region is calculated using a weighted average based on the population of the counties within each site-region. The percent positive seven-day moving average is then plotted to show the daily trends in COVID-19 testing in specific geographic areas.

### **C. Analysis: VISION COVID-19 VE Statistical Analysis Plan**

The primary objective of this analysis was to estimate COVID-19 vaccine effectiveness (VE) in preventing medical events associated with laboratory-confirmed SARS-CoV-2 infection, including hospitalizations and ED/UC encounters.

#### **Overall Study Design**

An EHR-based, test-negative study design was implemented where cases were defined as patients with COVID-like illness who tested positive for SARS-CoV-2 infection, and controls defined as patients with COVID-like illness who tested negative for infection. The test-negative design has been used extensively to estimate VE among medically attended influenza virus illness and is believed to minimize biases associated with access to vaccines and healthcare seeking behaviors (1,2). Vaccination against SARS-CoV-2 virus was the exposure of interest.

#### **Vaccination Status**

Full 2-dose mRNA vaccination was defined as receipt of dose 2 of either mRNA vaccine  $\geq 14$  days prior to the index date, regardless of the number of days between 2 doses. We examined two categories of partial mRNA vaccination. Partial 1-dose vaccination included patients who received their first dose  $\geq 14$  days before but who had not received dose 2 by the index date. Partial 2-dose vaccination included patients who were 1–13 days post-dose 2 (and thus not considered fully vaccinated) on the index date. Full 1-dose vaccination with the Johnson & Johnson COVID-19 vaccine (index date  $\geq 14$ -days after the single dose) was examined

separately. If the index date occurred during days 1-13 following dose one of any COVID-19 vaccine, the medical encounter was excluded because immunity was considered indeterminate.

### **Bivariate Analyses**

Bivariate analyses were conducted at the pooled and site levels. COVID-19 vaccination status by *a priori* determined covariates of interest was assessed for significant differences in characteristics of participants, with significant differences between groups defined as a standardized mean or proportion difference  $\geq 0.10$ . Laboratory-confirmed SARS-CoV-2 infection status by covariates of interest was also assessed through bivariate analysis.

### **Multivariate Analyses**

Analyses were conducted separately for hospitalization and ED/UC cohorts. Event data was pooled across all study partners for estimation of overall VE among hospitalization, while data was pooled across three partners (IH, RG, and KPNW) for the estimation of overall VE among ED/UC medical events. COVID-19 VE was estimated using multivariate logistic regression where  $VE = [1 - \text{odds ratio}] \times 100\%$ . The hospitalization odds ratio was defined as the ratio of the odds of hospitalization associated with SARS-CoV-2 infection among vaccinated participants to the odds of hospitalization associated with SARS-CoV-2 infection among unvaccinated participants. Similarly, the ED/UC medical event odds ratio was defined as the odds of an ED/UC medical event associated with SARS-CoV-2 infection among vaccinated participants to



the odds of an ED/UC medical event associated with SARS-CoV-2 infection among unvaccinated participants.

Since data were collected at the event- rather than person-level, the percentage of repeated measures were checked periodically. Repeated measure observations were expected to be low within the study's time frame, however, if repeated measures within a setting exceed 10%, sensitivity analyses were conducted to assess the effect of within-person correlation on VE and confidence intervals.

Initial multivariate analyses were conducted by incorporating covariates directly into the logistic regression model. Covariates for inclusion are those determined through bivariate analyses to be significantly associated with both the outcome and exposure, as well as those determined *a priori*. Preliminary estimates of VE were determined for fully and vaccinated patients. SAS version 9.4 was used for these analyses.

Multivariate analyses were conducted using an inverse propensity-score weighting method to further ensure balance among measured characteristics in the vaccinated and unvaccinated groups. Using established methods for estimating propensity scores within case-control studies (3), we first estimated propensity-for-vaccination scores among test-negative controls, then used the fitted model to calculate propensity-for-vaccination scores for test-positive observations. Vaccinated patients were weighted by the inverse of their propensity to be vaccinated. Unvaccinated patients were weighted by the inverse of their propensity to not be vaccinated. A dichotomous vaccination variable ( $\geq 14$ -days after first vaccine dose) was used for

propensity modeling. Propensity to vaccinate was estimated using boosted regression trees (BRT), a nonparametric sequential regression technique (4). A standardized mean or proportion difference  $<0.2$  was the cut-off for balance. Three covariates were included directly in the regression model to account for possible residual confounding remaining after BRT modeling. These include site-regions, local-level COVID-19 percent positivity (as spline), and calendar time (as spline). Any covariates not meeting the PS cut-off for balance were also included directly in the regression model.

Regularization settings used to prevent over fitting by BRT methods were determined based on overall sample size, however, the following guidelines were followed: shallow tree depth (2-3 interaction levels), large number of trees (1000-5000), low learning rate ( $\leq 0.01$ ), and 50-75% bagging. Propensity score weights were designed to estimate overall average treatment effect. Covariates for inclusion in the propensity model included those related to both the outcome and exposure, as well as those determined *a priori* for inclusion.

Applying best practices for using inverse probability of treatment weights described by Austin and Stuart (5), the distributions of weights were examined for each VE model and presented in supplementary tables (see Supplementary Results). Across all models, outlying weights were found at the extreme upper ends of the distributions. Therefore, we truncated weights at the 99.9 percentile for each model.

Propensities and weights were calculated using the ‘twang’ R package (6). All propensity-score analyses were conducted using R version 4.0.3.

## Covariates

Covariates that were expected or found to be associated with the likelihood of COVID-19 vaccination and the likelihood of COVID-19 positivity were included in the model.

To account for changes over time in vaccination uptake and virus circulation, calendar time in days was included in the BRT algorithms as a continuous covariate and in the regression model as a spline term. As a proxy for risk of infection, local-level percent-positive COVID-like illness times local-level percent-positive SARS-CoV-2 infection was included in both BRT and regression models. Spline functions for both calendar time and percent-positivity were defined as natural cubic splines with knots at quartiles. To account for geographic differences, site-regions were included as a factor in both the BRT algorithms and the regression models. Other potential covariates included:

- Demographic information (age, sex, race, ethnicity)
- Geographic information (hospital size, hospital type, urban/rural classification)
- High-risk medical conditions (cardiovascular disease, COPD, chronic lung disease, other pulmonary diseases, blood disorders, chronic metabolic disease, neurologic/neuromuscular disorders, immunocompromised conditions, hypertension, obesity, and others [Table S21])

## **Stratification**

COVID-19 VE was also assessed by stratifying on potential effect modifiers including age group, race, ethnicity, high-risk status, and vaccine manufacturer. All stratified VEs were estimated by subsetting the data into categories of the potential modifier. Stratified VE estimates were assessed using the same approach detailed for the primary analysis. Variables for inclusion were first identified in the unstratified analyses. Then propensity score weights and VE estimates were calculated using only those events which qualify for the inclusion in the strata. Due to smaller sample size and date of FDA emergency use authorization, VE analysis by Johnson and Johnson (J&J) manufacturer incorporated four changes: (1) study start date began on the index date of first fully vaccinated J&J recipient for each respective partner, (2) any partners with fewer than five J&J vaccine recipients at the time of data collection were excluded from the analysis, (3) site-regions were grouped so that each region contained at least five J&J vaccine recipients, and (4) all underlying medical conditions were collapsed into two categories, non-respiratory or respiratory medical conditions.

**Table S21. ICD-9 and-10 codes used for underlying medical conditions**

| Disease Condition                                                | ICD-10 Codes                                                                                                                                                                                                                                                                                                                                                                      | ICD- 9 Codes                                                                                                                                                                                                                                                                                                                                                     |
|------------------------------------------------------------------|-----------------------------------------------------------------------------------------------------------------------------------------------------------------------------------------------------------------------------------------------------------------------------------------------------------------------------------------------------------------------------------|------------------------------------------------------------------------------------------------------------------------------------------------------------------------------------------------------------------------------------------------------------------------------------------------------------------------------------------------------------------|
| <i>Respiratory Disease:</i>                                      |                                                                                                                                                                                                                                                                                                                                                                                   |                                                                                                                                                                                                                                                                                                                                                                  |
| Asthma                                                           | J45.*                                                                                                                                                                                                                                                                                                                                                                             | 493.*                                                                                                                                                                                                                                                                                                                                                            |
| COPD                                                             | J40.*, J41.*, J42.*, J43.*, J44.*                                                                                                                                                                                                                                                                                                                                                 | 491.*, 492.*, 496.*                                                                                                                                                                                                                                                                                                                                              |
| Other Chronic Lung Disease                                       | D86.0, E84.*, E88.01, J47.*, J60.*, J61.*, J62.*, J63.*, J64.*, J65.*, J66.*, J67.*, J68.*, J69.*, J70.*, J81.*, J82.*, J84.*, J95.0*, J96.*, J98.1*, J99.*, P25.*, P26.*, P27.*, P28.*, Q33.*, T86.3*, T86.8*, Z94.2, B39.*, B40.*, B41.*, B44.*, B45.*, B46.0, A15.*, A31.0, Q20.*, Q21.*, Q22.*, Q23.*, Q24.*, Q25.*, Q26.*, Q27.0, Q27.3*, Q27.4, Q27.8, Q27.9, Q28.*, Q89.3, | 031.0*, 135.*, 277.0*, 273.4, 277.6*, 494.*, 495.*, 500.*, 501.*, 502.*, 503.*, 504.*, 505.*, 506.*, 508.*, 510.*, 513.*, 514.*, 515.*, 516.*, 517.*, 518.1*, 518.2*, 518.3*, 518.6*, 518.83, 519.9*, 519.0*, 748.4*, 748.5*, 748.6*, 759.3*, 770.2*, 770.7*, V42.6*, 714.81, 769.*, 770.*, 115.*, 116.*, 484.6, 117.3, 518.6, 117.5, 321.*, 117.7, 011.*, 012.* |
| <i>Heart Disease:</i>                                            |                                                                                                                                                                                                                                                                                                                                                                                   |                                                                                                                                                                                                                                                                                                                                                                  |
| Heart Failure                                                    | I50.*                                                                                                                                                                                                                                                                                                                                                                             | 428.*                                                                                                                                                                                                                                                                                                                                                            |
| Ischemic Heart Disease                                           | I21.*, I22.*, I23.*, I24.*, I25.*                                                                                                                                                                                                                                                                                                                                                 | 410.*, 411.*, 412.*, 414.*                                                                                                                                                                                                                                                                                                                                       |
| Hypertension                                                     | I10.*, I11.*, I12.*, I13.*, I15.*                                                                                                                                                                                                                                                                                                                                                 | 401.*, 402.*, 403.*, 404.*, 405.*                                                                                                                                                                                                                                                                                                                                |
| Other Heart Disease                                              | I01.*, I02.*, I05.*, I06.*, I07.*, I08.*, I09.*, I11.*, I13.*, I26.*, I27.*, I28.*, I31.*, I34.*, I35.*, I36.*, I37.*, I41.*, I42.*, I43.*, I44.*, I46.*, I48.*, I51.*, I52.*, I97.0, I97.1*, M31.*, Z94.1, Z95.*, Z98.61, I71.*, I72.*, I73.*, I74.*, I75.*, I79.*                                                                                                               | 393.*, 394.*, 395.*, 396.*, 397.*, 398.*, 415.*, 416.*, 417.*, 423.*, 424.*, 425.*, 426.*, 427.1*, 427.2*, 427.3*, 427.4*, 427.5*, 427.6*, 427.8*, 429.*, 440.*, 446.*, V42.1*, V45.0*, V45.81, V45.82, 997.1, 441.*, 442.*, 443.*, 444.*, 447.*, 446.1                                                                                                          |
| <i>Cerebrovascular Disease:</i>                                  |                                                                                                                                                                                                                                                                                                                                                                                   |                                                                                                                                                                                                                                                                                                                                                                  |
| Stroke                                                           | I60.*, I61.*, I63.*                                                                                                                                                                                                                                                                                                                                                               | 430.*, 431.*, 433.*, 434.*                                                                                                                                                                                                                                                                                                                                       |
| Other Cerebrovascular Disease                                    | I62.*, I68.*, I69.*                                                                                                                                                                                                                                                                                                                                                               | 432.*, 435.*, 436.*, 437.*, 438.*                                                                                                                                                                                                                                                                                                                                |
| <i>Metabolic Disease:</i>                                        |                                                                                                                                                                                                                                                                                                                                                                                   |                                                                                                                                                                                                                                                                                                                                                                  |
| Diabetes Type I                                                  | E10.*                                                                                                                                                                                                                                                                                                                                                                             | 250.01, 250.03, 250.11, 250.13, 250.21, 250.23, 250.31, 250.33, 250.41, 250.43, 250.51, 250.53, 250.61, 250.63, 250.71, 250.73, 250.81, 250.83, 250.91, 250.93                                                                                                                                                                                                   |
| Diabetes Type II                                                 | E11.*                                                                                                                                                                                                                                                                                                                                                                             | 250.02, 250.00, 250.12, 250.10, 250.22, 250.20, 250.32, 250.30, 250.42, 250.40, 250.52, 250.50, 250.62, 250.60, 250.72, 250.70, 250.82, 250.80, 250.92, 250.90                                                                                                                                                                                                   |
| Diabetes due to underlying condition or other specified diabetes | E08.*, E09.* E13.*                                                                                                                                                                                                                                                                                                                                                                | 251.* 357.2*, 362.0*, 362.11, 366.41                                                                                                                                                                                                                                                                                                                             |
| Other Metabolic Disease                                          | E00.*, E01.*, E03.*, E05.*, E06.*, E15.*, E16.*, E20.*, E21.*, E22.*, E23.*, E24.*, E25.*, E26.*, E27.*, E28.*, E29.*, E31.*, E32.*, E34.*, Z68.4*, E70.*, E71.*, E72.*, E74.*, E75.2*, E76.*, E77.*, E78.*, E79.*, E80.*, E83.*, E85.*, E88.*                                                                                                                                    | 249*, 255.*, 270.*, 271.*, 272.*, 277.*                                                                                                                                                                                                                                                                                                                          |
| <i>Other Diseases:</i>                                           |                                                                                                                                                                                                                                                                                                                                                                                   |                                                                                                                                                                                                                                                                                                                                                                  |

|                                       |                                                                                                                                                                                                                                                                                                                                                                                                                                                                                                                                                                                                                                                                           |                                                                                                                                                                                                                                                                                                                                                                                                                                                                                            |
|---------------------------------------|---------------------------------------------------------------------------------------------------------------------------------------------------------------------------------------------------------------------------------------------------------------------------------------------------------------------------------------------------------------------------------------------------------------------------------------------------------------------------------------------------------------------------------------------------------------------------------------------------------------------------------------------------------------------------|--------------------------------------------------------------------------------------------------------------------------------------------------------------------------------------------------------------------------------------------------------------------------------------------------------------------------------------------------------------------------------------------------------------------------------------------------------------------------------------------|
| Clinical Obesity                      | E66.*                                                                                                                                                                                                                                                                                                                                                                                                                                                                                                                                                                                                                                                                     | 278.*                                                                                                                                                                                                                                                                                                                                                                                                                                                                                      |
| Clinically Underweight                | R63.6, F50.0*, E40.*, E41.*, E42.*, E43.*, E44.*, E45.*, E46.*                                                                                                                                                                                                                                                                                                                                                                                                                                                                                                                                                                                                            | 783.22, 307.1, 260.*, 261.*, 262.*, 263.*                                                                                                                                                                                                                                                                                                                                                                                                                                                  |
| Renal Disease                         | I12.*, I13.* N01.*, N02.*, N03.*, N04.*, N05.*, N06.*, N07.*, N08.*, N11.*, N14.*, N15.*, N16.*, N18.*, N25.*, N26.*, N28.*, Q27.1, Q27.2, Q60.*, Z49.*, Z91.15, Z94.0, Z99.2                                                                                                                                                                                                                                                                                                                                                                                                                                                                                             | 285.21, 403.*, 404.*, 581.*, 582.*, 583.*, 585.*, 587.*, 588.0*, 588.1*, 590.0*, 593.8.*, V42.0*, V56.*, V45.1*                                                                                                                                                                                                                                                                                                                                                                            |
| Liver Disease                         | B18.*, I81.*, I85.*, K70.*, K71.*, K72.*, K73.*, K74.*, K75.*, K76.*, K77.*                                                                                                                                                                                                                                                                                                                                                                                                                                                                                                                                                                                               | 571.*, 572.1*, 572.2*, 572.3*, 572.4*, 572.5*, 572.6*, 572.7*, 572.8*                                                                                                                                                                                                                                                                                                                                                                                                                      |
| Blood Disorder                        | D55.*, D56.0, D56.1, D56.2, D56.4, D56.5, D56.9, D57.0*, D57.1, D57.2*, D57.4*, D57.8*, D58.*, D59.*, D60.*, D61.*, D64.0, D64.1, D64.2, D64.3, D64.4, D64.8*, D65.*, D66.*, D67.*, D68.*                                                                                                                                                                                                                                                                                                                                                                                                                                                                                 | 282.*, 283.*, 284*                                                                                                                                                                                                                                                                                                                                                                                                                                                                         |
| Other Immunosuppression               | B20.*, B59.*, B97.3*, D47.Z1, D70.*, D71.*, D72.*, D73.*, D76.*, D80.*, D81.*, D82.*, D83.*, D84.*, D89.*, M05.*, M06.*, M07.*, M08.*, M30.*, M31.*, M32.*, M33.*, M34.*, M35.0*, M35.9, Q89.0*, Z21*, Z51.0, Z51.1*, Z79.5*, Z79.82                                                                                                                                                                                                                                                                                                                                                                                                                                      | 042.*, 43.*, 44.*, 136.3*, 279.*, 288.0*, 288.1*, 288.2*, 288.4*, 446.*, 710.0*, 710.1*, 710.2*, 710.3*, 710.4*, 714.*, V08.*, V58.0*, V58.1*, 996.8.*, 710.*, 963.1                                                                                                                                                                                                                                                                                                                       |
| Organ Transplant                      | Z48.2*, Z94.*                                                                                                                                                                                                                                                                                                                                                                                                                                                                                                                                                                                                                                                             | V42.2*, V42.7*, V42.8*, V42.9*, V42.1*, V42.6*, V42.0*, V42.4,                                                                                                                                                                                                                                                                                                                                                                                                                             |
| Cancer                                | C00.*, C01.*, C02.*, C03.*, C04.*, C05.*, C06.*, C07.*, C08.*, C09.*, C10.*, C11.*, C12.*, C13.*, C14.*, C15.*, C16.*, C17.*, C18.*, C19.*, C20.*, C21.*, C22.*, C23.*, C24.*, C25.*, C26.*, C30.*, C31.*, C32.*, C33.*, C34.*, C37.*, C38.*, C39.*, C40.*, C41.*, C43.*, C44.*, C45.*, C46.*, C47.*, C48.*, C49.*, C4A.*, C50.*, C51.*, C52.*, C53.*, C54.*, C55.*, C56.*, C57.*, C58.*, C60.*, C61.*, C62.*, C63.*, C64.*, C65.*, C66.*, C67.*, C68.*, C69.*, C70.*, C71.*, C72.*, C73.*, C74.*, C75.*, C76.*, C77.*, C78.*, C79.*, C7A.*, C7B.*, C80.*, C81.*, C82.*, C83.*, C84.*, C85.*, C86.*, C88.*, C90.*, C91.*, C92.*, C93.*, C94.*, C95.*, C96.*, D03.*, D46.* | 140.*, 141.*, 142.*, 143.*, 144.*, 145.*, 146.*, 147.*, 148.*, 149.*, 150.*, 151.*, 152.*, 153.*, 154.*, 155.*, 156.*, 157.*, 158.*, 159.*, 160.*, 161.*, 162.*, 163.*, 164.*, 165.*, 166.*, 167.*, 168.*, 169.*, 170.*, 171.*, 172.*, 174.*, 175.*, 176.*, 177.*, 178.*, 179.*, 180.*, 181.*, 182.*, 183.*, 184.*, 185.*, 186.*, 187.*, 188.*, 189.*, 190.*, 191.*, 192.*, 193.*, 194.*, 195.*, 196.*, 197.*, 198.*, 199.*, 200.*, 201.*, 202.*, 203.*, 204.*, 205.*, 206.*, 207.*, 208.* |
| Dementia (including Alzheimer's)      | F01.*, F02.*, F03.*, G30.*                                                                                                                                                                                                                                                                                                                                                                                                                                                                                                                                                                                                                                                | 290.*, 294.1*, 331.*                                                                                                                                                                                                                                                                                                                                                                                                                                                                       |
| Neurological/Musculoskeletal Disorder | H49.81*, M12.0*, M36.0, E75.02, E75.19, E75.4, F71.*, F72.*, F73.*, F84.2, G10.*, G11.*, G12.*, G13.*, G14.*, G20.*, G21.*, G23.*, G24.*, G25.*, G26.*, G31.*, G32.*, G35.*, G36.*, G37.*, G40.*, G45.*, G46.*, G60.*, G61.*, G62.*, G63.*, G64.*, G70.*, G71.*, G73.*, G80.*, G81.*, G82.*, G83.*, G90.3, G91.*, G93.*, G94.*, G95.*, G99.2, P91.*, Q00.*, Q01.*, Q02.*, Q03.*, Q04.*, Q05.*, Q06.*, Q07.*, Q76.*, Q77.*, Q78.*, Q79.*, Q85.*, Q87.4*, Q91.*, Q92.*, Q93.*, Q96.*, R41.*, R53.2, R54.*                                                                                                                                                                   | 318.1*, 318.2*, 330.*, 332.*, 333.0*, 333.4*, 333.5*, 333.6*, 333.7*, 333.8*, 333.9*, 334.*, 335.*, 336.*, 340.*, 341.*, 342.*, 343.*, 345.*, 344.0*, 358.0*, 358.1*, 359.*, 756.1*, 756.3*, 756.4*, 756.5*, 756.6*, 768.5*, 780.3*, 780.72                                                                                                                                                                                                                                                |
| Down's Syndrome                       | Q90.*                                                                                                                                                                                                                                                                                                                                                                                                                                                                                                                                                                                                                                                                     | 758.0                                                                                                                                                                                                                                                                                                                                                                                                                                                                                      |

\* Includes all sub-codes

## References

1. Foppa IM, Haber M, Ferdinands JM, Shay DK. (2013). The case test-negative design for studies of the effectiveness of influenza vaccine. *Vaccine*. 31:3104–9.
2. Jackson ML, Nelson JC. (2013). The test-negative design for estimating influenza vaccine effectiveness. *Vaccine*. 31:2165–8.
3. McCaffrey, D. F., Ridgeway, G., & Morral, A. R. (2004). Propensity score estimation with boosted regression for evaluating causal effects in observational studies. *Psychological methods*, 9(4), 403.
4. Ridgeway, G., McCaffrey, D., Morral, A., Burgette, L., & Griffin, B. A. (2017). Toolkit for Weighting and Analysis of Nonequivalent Groups: A tutorial for the twang package. Santa Monica, CA: RAND Corporation.
5. Austin, P.C., Stuart, E.A. (2015). Moving towards best practices when using inverse probability of treatment weights (IPTW) using the propensity score to estimate causal treatment effects in observational studies. *Statistics and Medicine*, 34: 3661-3679.

## **Section S4. Supplemental Bias Analysis**



## **Bias from misclassification of exposure and outcome in COVID-19 VE estimated from a test-negative design**

### **Introduction**

VISION COVID-19 VE estimates are made using a test-negative case-control design (TND).

Although several forms of bias may distort estimates of vaccine effectiveness derived from TND studies, there have been few attempts to quantify their magnitude. Bias can arise from numerous sources. Of particular concern for VISION COVID-19 VE studies is bias arising from misclassification of study participants due to errors in measurement of exposure or outcome status. The VISION VE methodology relies on retrieval of electronic vaccination records from Electronic Health records (EHRs) and state registries, and these sources may imperfectly capture vaccination status, leading to misclassification of exposure. Although the VISION VE methodology relies on molecular assays to determine outcome status, these assays may also be imperfect, leading to misclassification of outcome.

We sought to assess the approximate magnitude of potential biases in COVID-19 VE estimates derived from TND studies due to misclassification of outcome status arising from use of imperfect diagnostic tests and misclassification of exposure status due to imperfect capture of COVID-19 vaccination from electronic records (i.e., electronic medical record-linked vaccine registries). To do this, we examined biases arising in a simulated case-control study of COVID-19 vaccine effects in adults.

### **Methods**

Following methods of Ferdinands and Shay 2011, we created a simulated cohort of individuals and followed them through a simulated test-negative case-control study using a decision tree model that mimics the structure and outcomes of a COVID-19 VE TND study. In this simulated study,

as in our actual study, cases are adults hospitalized with COVID-19-like illness who test positive with a SARS-CoV2 diagnostic test ordered at discretion of the clinical provider and controls are those who test negative.

As depicted by the branches of the decision tree (Figure 1), study participants were assumed to be vaccinated with a user-specified probability. In the unvaccinated subset of participants, the probability of an individual becoming infected with symptomatic COVID-19 illness was specified as  $p\_COVID$  and, in the vaccinated subset of participants, the probability of COVID-19 was assumed to be a function of the true underlying VE among infection [ $p\_COVID*(1-VE)$ ]. Participants had user-specified probabilities of becoming hospitalized and of receiving a diagnostic test for COVID-19 given hospitalization. Diagnostic test results were either positive or negative depending on true disease status and sensitivity and specificity of the diagnostic test. Each tested participant was either a true positive or a false negative (if the participant truly had COVID-19) or a true negative or a false positive (if the participant truly did not have COVID-19). A participant who tested positive, whether a true positive or a false positive, was classified as an observed case, as would happen in an actual TND study. A participant who was not tested would be ineligible and excluded from the study. Vaccination status was assumed to be retrieved from an electronic vaccine documentation system with imperfect sensitivity and specificity, such that the observed vaccination status used in the calculation of VE could differ from true vaccination status. Using Monte Carlo methods, we simulated the total number of cases, the number of vaccinated cases, and the ratio of vaccinated to unvaccinated cases. This ratio multiplied by the ratio of unvaccinated to vaccinated controls gave the observed odds ratio; 1 minus the observed odds ratio gave the observed VE. Bias was the difference between true and

observed VE. Each simulated scenario was based on 10,000 model iterations, and calculations were conducted with @RISK software (Palisade Inc; Ithica NY).

### **Decision Tree Input Values**

Our decision tree model required several inputs to simulate a TND study. These variables included probability of COVID-19, expected VE among symptomatic COVID-19 infection, likelihood of being hospitalized given symptomatic COVID-19 infection, likelihood of being tested for COVID-19 if hospitalized, characteristics of clinical diagnostic COVID-19 tests, and characteristics of the vaccination documentation system. For the two sources of bias that we are evaluating – misclassification of exposure due to imperfect vaccination status reporting and misclassification of outcome due to imperfect diagnostic tests – the relevant inputs are defined by a probability distribution—a summary of the possible values of the variable—based on results of literature review. For these variables, we used a Beta-PERT distribution, which is summarized by its minimum, maximum, and most likely values. To parameterize these Beta-PERT distributions, we selected values that matched the range of values and used the median value as the most likely value, based on the literature. Other model inputs were point estimates derived from a review of the relevant literature including results from surveillance of COVID-19 illness, randomized trials of COVID-19 vaccine effects, and/or empirical data from our COVID-19 VE TND study, as described below.

### **SARS-CoV2 diagnostic test characteristics**

We described the characteristics of SARS-CoV2 diagnostic testing using sensitivity and specificity. To obtain estimates of clinical test sensitivity and specificity, we conducted a

literature review to define the performance characteristics of clinical molecular diagnostic tests for SARS-CoV-2 detection. We limited the reviews to RT-PCR-based molecular assays because our TND study methodology is limited to those assays. Results came primarily from a meta-analysis by Dinnes et al. (2020) supplemented by results of assays conducted internally at one of our study sites (personal communication, A. Steffens, Jan 2021). We found 18 estimates of the sensitivity of molecular SARS-CoV-2 assays (Table 1), ranging from 68% to 100%, with median of 96%. For the model, we defined sensitivity with a Beta-PERT distribution with minimum 0.68, maximum 1.0 and most likely value of 0.96. We found 13 estimates of specificity of molecular SARS-CoV-assays, with minimum of 92%, maximum of 100% and median of 100%. Based on these values, we parameterized specificity with a Beta-Pert distribution with minimum 0.92, maximum of 1.0 and most likely value of 1.0. Sensitivity and specificity of these molecular tests were negatively correlated, and this correlation was accounted for in the model using correlation coefficient of -0.39.

### **Vaccine documentation characteristics**

We described the characteristics of the COVID-19 vaccination documentation system using the sensitivity and specificity of the system. We conducted a literature review and contacted subject matter experts within the CDC COVID-19 response to identify reported performance characteristics of COVID-19 vaccination registries; however, no publications or unpublished results were identified. Hence, we conducted a literature review to establish performance characteristics of electronic influenza vaccination documentation systems as a proxy for COVID-19 systems. We found three studies reporting sensitivity of EHR- or vaccine registry-based documentation of influenza vaccination among adults and two studies reporting specificity of

these systems. In all of these studies, the electronic vaccination sources were compared to individual self-report as the gold standard. Electronic vaccination sources included EMRs and/or vaccine registries (we excluded studies evaluating billing data as a source of vaccine status). Based on three studies with five effect estimates (Sy 2010, Irving 2009, Greene 2009), sensitivity of vaccine documentation systems for influenza vaccine ranged from 68% to 95% with a median of 81% (Table 2). From two studies with four effect estimates, specificity ranged from 97% to 100% with a median of 98% (Sy 2010; Irving 2009) (Table 3). Sensitivity was parameterized with a Beta-Pert distribution with minimum 0.68, maximum 0.95 and most likely value of 0.81 for sensitivity, and specificity was parameterized with as a Beta-Pert distribution with minimum 0.97, maximum 1.0, and most likely value of 0.98.

### **Expected VE**

Expected VE was assumed to be 95% based on the published estimates of vaccine efficacy of mRNA vaccines among RT-PCR–confirmed COVID-19 infection from randomized trials of COVID-19 vaccine among adults (Polack 2021; Baden 2021). In supplemental analyses, we lowered expected VE to 75% and 50%.

### **Vaccination coverage**

Because vaccination rates can change rapidly, we conducted analyses using a wide range of vaccination coverage, from a low of 10% to a high of 90% vaccine coverage.

### **Probability of COVID-19 and hospitalization rates**

We first built and calibrated the model based on data reflecting the period of time from June through September 2020, which was the period for which we could obtain information about

estimated COVID-19 attack rates from published sources. Specifically, we derived estimates of the probability of COVID-19 based on rates of symptomatic COVID-19 infection for adults  $\geq 65$  years provided from Reese et al.'s (2020) estimate of COVID-19 burden for the United States for the period of March through September 2020. This attack rate reflected adjustments for underreporting of COVID-19 cases and thus was considered to be a more accurate estimate of true COVID attack rates. From Reese's estimate, we derived a rate of COVID-19 illness of 0.0129 per month. This monthly rate was derived from the period of March through September because rates specifically from June to September were not available (hence, the monthly average rate from March to September was assumed to apply to the June to September time period). Percent COVID-19 positivity among patients observed in the simulated TND study was assumed to be 7%, the observed average percent of RT-PCR tests that were positive for SARS-CoV-2 for June through September, 2020 (personal communication, Situational Awareness Branch, COVID-19 Response, Feb 2021) and similar to the observed percent positive of 6.3% among adults aged  $\geq 65$  in our VISION VE study hospitals for the period from June through September, 2020 (personal communication, A. Steffens, Jan 2021). The likelihood of being hospitalized given symptomatic COVID-19 infection was assumed to be 22% for adults aged  $\geq 65$  years, based on the ratio of estimated hospitalizations to cases reported by Reese et al. Using these inputs, our model estimated a rate of COVID-19 hospitalization of 2.89 hospitalizations per 100,000 compared to Reese's 2.81 per 100,000. This scenario is referred to as the "lower burden scenario."

Because burden of COVID-19 illness varied during the period during which our VE estimate was derived (January to May 2021), we also estimated a "higher burden scenario" in which the

COVID-19 percent positivity in the hospital setting was assumed to be 25%, based on the observed positivity among our VISION VE study hospitals from January to March. The underlying probability of COVID-19 symptomatic illness was calibrated by increasing it to 0.074 per month to yield the observed 25% positivity.

### **SARS-CoV2 testing rate**

The probability of clinical testing for SARS-CoV-2 given hospitalization for acute COVID-19-like respiratory illness was assumed to be 93%, the rate of testing observed for individuals  $\geq 65$  years of age at our VISION VE hospitals for the period of June through September 2020 (personal communication, A. Steffens, Jan 2021).

### **Bias estimate for pooled inpatient VE estimate**

In addition to the scenarios described above, we evaluated potential bias for the pooled inpatient VE estimate assuming observed values for vaccine coverage, percent positivity, and testing rates. Values for these parameters were derived from the analytic dataset used to estimate pooled inpatient VE in the main manuscript.

## **Results**

We first present results for the lower burden scenario in section 1, followed by the higher burden scenario in section 2. Finally, we summarize the bias estimate for the pooled inpatient VE estimate in section 3.

## 1. Lower burden scenario

### *1a. Expected VE = 95%*

Imperfect test sensitivity. With imperfect test sensitivity only, observed VE was approximately 95%, and invariant with changes in vaccine coverage. Thus, bias in this scenario was essentially zero.

Imperfect test specificity. With imperfect test specificity only, observed VE was approximately 82%, and invariant with changes in vaccine coverage. Bias in this scenario was -13 percentage points from an expected VE of 95%.

Imperfect vaccine documentation sensitivity. With imperfect vaccine documentation sensitivity only, observed VE ranged from 95% at coverage of 10% to 87% at coverage of 90%. Bias in this scenario ranged from zero at low coverage to -8 percentage points from an expected VE of 95% at high coverage (Fig 2).

Imperfect vaccine documentation specificity. Observed VE ranged from 81% at coverage of 10% to 95% at coverage of 90%. Bias ranged from -14 percentage points at 10% coverage to essentially zero at 90% coverage (Fig 3).

Imperfect vaccine documentation and clinical tests. With both imperfect vaccine documentation and imperfect clinical tests, observed VE varied with coverage, with lower VE at the extremes of coverage (Fig 4). Bias ranged from -34 to -19 percentage points, depending on coverage.

### *1b. Expected VE = 75%*

Imperfect test sensitivity. With imperfect test sensitivity only, observed VE was approximately 75%, and invariant with changes in vaccine coverage. Thus, bias in this scenario was essentially zero.



Imperfect test specificity. With imperfect test specificity only, observed VE was approximately 65%, and invariant with changes in vaccine coverage. Bias in this scenario was -10 percentage points from an expected VE of 75%.

Imperfect vaccine documentation sensitivity. With imperfect vaccine documentation sensitivity only, observed VE ranged from 75% at coverage of 10% to 53% at coverage of 90% (Fig. 5). Bias in this scenario ranged from zero at low coverage to -22 percentage points from an expected VE of 75% at high coverage.

Imperfect vaccine documentation specificity. Observed VE ranged from 64% at coverage of 10% to 75% at coverage of 90%. Bias ranged from -11 percentage points at 10% coverage to essentially zero at 90% coverage (Fig. 6).

Imperfect vaccine documentation and clinical tests. With both imperfect vaccine documentation and imperfect clinical tests, observed VE varied with coverage, with lower VE at the extremes of coverage and highest observed VE at coverage of around 40 to 50% (Fig 7). Bias ranged from -36 to -16 percentage points, depending on coverage.

*1c. Expected VE = 50%*

Imperfect test sensitivity. With imperfect test sensitivity only, observed VE was approximately 50%, and invariant with changes in vaccine coverage. Bias in this scenario was essentially zero.

Imperfect test specificity. With imperfect test specificity only, observed VE was approximately 43%, and invariant with changes in vaccine coverage. Bias in this scenario was -7 percentage points from an expected VE of 50%.

Imperfect vaccine documentation sensitivity. With imperfect vaccine documentation sensitivity only, observed VE ranged from 49% at coverage of 10% to 27% at coverage of 90% (Fig. 8).

Bias in this scenario ranged from -1 percentage point at low coverage to -23 percentage points from an expected VE of 50% at high coverage.

Imperfect vaccine documentation specificity. Observed VE ranged from 43% at coverage of 10% to 50% at coverage of 90% (Fig. 9). Bias ranged from -7 percentage points at 10% coverage to essentially zero at 90% coverage.

Imperfect vaccine documentation and clinical tests. With both imperfect vaccine documentation and imperfect clinical tests, observed VE varied with coverage, with lower VE at the extremes of coverage and highest observed VE at coverage of around 30 to 40% (Fig 10). Bias ranged from -12 to -29 percentage points, depending on coverage.

## 2. Higher burden scenario

### *2a. Expected VE = 95%*

Imperfect test sensitivity. With imperfect test sensitivity only, observed VE was approximately 95%, and invariant with changes in vaccine coverage. Thus, bias in this scenario was essentially zero.

Imperfect test specificity. With imperfect test specificity only, observed VE was approximately 92%, and invariant with changes in vaccine coverage. Bias in this scenario was -3 percentage points from an expected VE of 95%.

Imperfect vaccine documentation sensitivity. With imperfect vaccine documentation sensitivity only, observed VE ranged from 95% at coverage of 10% to 88% at coverage of 90% (Fig. 11). Bias in this scenario ranged from zero at low coverage to -7 percentage points from an expected VE of 95% at high coverage.

Imperfect vaccine documentation specificity. Observed VE ranged from 81% at coverage of 10% to 95% at coverage of 90% (Fig. 12). Bias ranged from -14 percentage points at 10% coverage to essentially zero at 90% coverage.

Imperfect vaccine documentation and clinical tests. With both imperfect vaccine documentation and imperfect clinical tests, observed VE varied with coverage, with lower VE at the extremes of coverage and highest observed VE at coverage of around 40 to 60% (Fig 13). Bias ranged from -20 to -7 percentage points, depending on coverage.

*2b. Expected VE = 75%*

Imperfect test sensitivity. With imperfect test sensitivity only, observed VE was approximately 75%, and invariant with changes in vaccine coverage. Thus, bias in this scenario was essentially zero.

Imperfect test specificity. With imperfect test specificity only, observed VE was approximately 73%, and invariant with changes in vaccine coverage. Bias in this scenario was -2 percentage points from an expected VE of 75%.

Imperfect vaccine documentation sensitivity. With imperfect vaccine documentation sensitivity only, observed VE ranged from 75% at coverage of 10% to 53% at coverage of 90% (Fig. 14). Bias in this scenario ranged from zero at low coverage to -22 percentage points from an expected VE of 75% at high coverage.

Imperfect vaccine documentation specificity. Observed VE ranged from 64% at coverage of 10% to 75% at coverage of 90% (Fig. 15). Bias ranged from -11 percentage points at 10% coverage to essentially zero at 90% coverage.

Imperfect vaccine documentation and clinical tests. With both imperfect vaccine documentation and imperfect clinical tests, observed VE varied with coverage, with lower VE at the extremes of coverage and highest observed VE at coverage of around 40 to 50% (Fig 16). Bias ranged from -27 to -8 percentage points, depending on coverage.

*2c. Expected VE = 50%*

Imperfect test sensitivity. With imperfect test sensitivity only, observed VE was approximately 49%, and invariant with changes in vaccine coverage. Bias in this scenario was -1 percentage points from an expected VE of 50%.

Imperfect test specificity. With imperfect test specificity only, observed VE was approximately 49%, and invariant with changes in vaccine coverage. Bias in this scenario was -1 percentage points from an expected VE of 50%.

Imperfect vaccine documentation sensitivity. With imperfect vaccine documentation sensitivity only, observed VE ranged from 49% at coverage of 10% to 27% at coverage of 90% (Fig. 17). Bias in this scenario ranged from -1 percentage point at low coverage to -23 percentage points from an expected VE of 50% at high coverage.

Imperfect vaccine documentation specificity. Observed VE ranged from 43% at coverage of 10% to 50% at coverage of 90% (Fig. 18). Bias ranged from -7 percentage points at 10% coverage to essentially zero at 90% coverage.

Imperfect vaccine documentation and clinical tests. With both imperfect vaccine documentation and imperfect clinical tests, observed VE varied with coverage, with lower VE at the extremes of coverage and highest observed VE at coverage of around 40 to 50% (Fig. 19). Bias ranged from -25 to -7 percentage points, depending on coverage.

### 3. Bias estimate for pooled inpatient VE estimate

To illustrate the range of potential bias from misclassification of exposure and outcome relevant to the primary inpatient VE estimate, we used the model to estimate bias assuming observed values of COVID-19 percent positivity, COVID-19 testing rate (given hospitalization), and vaccination coverage.

The inpatient VE results presented in the main manuscript were derived within the context of 10% overall COVID percent positivity, testing rate of 74%, full mRNA vaccination coverage of 36%, and partial vaccination coverage of 14%. Assuming an expected VE of 95%, we estimated observed VE for full vaccination resulting from each source of bias that we modeled, separately and cumulatively (Table 4). For example, with imperfect sensitivity and specificity of clinical tests and imperfect vaccine documentation sensitivity and specificity, we would observe a VE of 85%.

### **Summary and Limitations**

By simulating a test negative case-control study of COVID-19 VE in older adults, we found that misclassification of exposure and outcome, when considered together, led to underestimation of vaccine benefit. Our results aid interpretation of our VISION COVID-19 VE estimates by providing insight into the potential magnitude of underestimation of the VE estimates derived from our test-negative design study using molecular diagnostic assays and electronic vaccination documentation systems. For instance, assuming the inputs we specified and an expected VE of 95%, testing of 74%, percent positivity of 10%, and coverage of 36% for full vaccination (as

observed for the pooled inpatient VE mRNA estimate), we would expect to underestimate VE by about 10 percentage points due to misclassification of both exposure and outcome.

At low coverage, imperfect specificity of vaccine documentation was the largest contributor to underestimation of VE, suggesting that misclassification of COVID-19 vaccine status due to imperfect specificity may be an influential source of bias. Unfortunately, we had no empirical data about the specificity of the COVID vaccination documentation system and thus relied on information about influenza vaccination documentation. That literature, however, was also sparse, leaving considerably uncertainty about this value of specificity. Furthermore, the specificity values derived from the influenza literature were based on two studies that compared ascertainment of vaccination status by retrieval of electronic documentation with patient self-report of vaccination status. Because self-report is itself imperfect, we may have underestimated the specificity of the vaccine documentation system. For these reasons, it may be as plausible to assume 100% specificity of the electronic COVID vaccination documentation system (i.e., no false positives). Clearly it is important to obtain more and better information on the characteristics of the vaccine documentation system in order to improve our understanding of the approximate bias in VE. In lower burden scenarios, imperfect clinical test specificity also contributed substantially to bias. According to our simulations, imperfect sensitivity of clinical tests was not a meaningful contributor to bias of our VE estimates.

Although this supplemental analysis offers insight into potential bias by providing a quantitative estimate of the influence on VE from both misclassification of outcome and exposure, it has several limitations. The bias estimates should be interpreted with caution and are intended to

give an approximate idea of the magnitude of bias rather than precise estimates. Ours is a simple model of a test-negative design, and we did not model the potential attenuation of COVID-19 disease severity by vaccination. If vaccine attenuates the severity of disease, we expect VE among COVID-19 hospitalization to be higher than VE among symptomatic COVID-19 illness. Not every variable in our model was described by a probability distribution; hence, we did not represent all inherent uncertainty in model inputs. Some of the variables represented by probability distributions had little data upon which to base the distributions; in particular, as described above, we found no information about the performance characteristics of COVID-19 vaccine documentation systems and instead assumed performance characteristics of influenza vaccine documentation systems. Better information on the performance characteristics of COVID-19 vaccination documentation systems is needed. We assumed that misclassification of exposure and outcome were nondifferential, although this could be modified in future analyses. Thus, we would expect to observe bias toward the null, i.e., lower observed VE than expected VE, consistent with our findings. We focused on a VE study among older adults, and our results may not generalize to other age groups. Although we examined bias in VE estimates due to imperfect test characteristics and vaccine documentation, other sources of bias exist. Of importance are sources of potential selection bias that can distort estimates of VE. The over- or underestimation of VE arising from different types of selection bias should be systematically evaluated in future research.

The recommendation by the ACIP that all US adults receive COVID-19 vaccination likely means that future comparisons of COVID-19 outcomes in vaccinated and unvaccinated individuals in the United States will rely on observational studies. A better understanding of the

magnitude of potential biases in observational studies, particularly the commonly used test negative case-control studies, will be essential if we seek to monitor the effectiveness of the COVID-19 vaccine program.



## References

Baden LR, El Sahly HM, Essink B, et al. Efficacy and Safety of the mRNA-1273 SARS-CoV-2 Vaccine. *N Engl J Med*. 2021 Feb 4;384(5):403-416.

Dinnes J, Deeks JJ, Adriano A, Berhane S, et al. Rapid, point-of-care antigen and molecular-based tests for diagnosis of SARS-CoV-2 infection. *Cochrane Database Syst Rev*. 2020 Aug 26;8:CD013705.

Ferdinands JM, Shay DK. Magnitude of potential biases in a simulated case-control study of the effectiveness of influenza vaccination. *Clin Infect Dis*. 2012 Jan 1;54(1):25-32.

Greene SK, Shi P, Dutta-Linn MM, Shoup JA, et al. Accuracy of data on influenza vaccination status at four Vaccine Safety Datalink sites. *Am J Prev Med*. 2009 Dec;37(6):552-5

Irving SA, Donahue JG, Shay DK, et al. Evaluation of self-reported and registry-based influenza vaccination status in a Wisconsin cohort. *Vaccine*. 2009 Nov 5;27(47):6546-9.

Polack FP, Thomas SJ, Kitchin N, et al. Safety and Efficacy of the BNT162b2 mRNA Covid-19 Vaccine. *N Engl J Med*. 2020 Dec 31;383(27):2603-2615.

Reese H, Iuliano AD, Patel NN, Garg S et al. Estimated incidence of COVID-19 illness and hospitalization - United States, February-September, 2020. *Clin Infect Dis*. 2020 Nov 25:ciaa1780. Epub ahead of print.

Sy LS, Liu IL, Solano Z, Cheetham TC, et al. Accuracy of influenza vaccination status in a computer-based immunization tracking system of a managed care organization. *Vaccine*. 2010 Jul 19;28(32):5254-9.

**Acknowledgments**

We thank Eric Griggs, Jeremiah Williams, and Palak Patel for help preparing this analysis.

**Figures**

Figure 1. Decision tree model for examining bias in estimates of vaccine effectiveness derived from a test-negative case-control study. Chance nodes are shown by circles, which denote outcomes that may occur by chance at each point in the tree. The likelihood of an outcome occurring is given by a user-specified probability and the probabilities of outcomes emanating from each chance node must sum to one. Terminal nodes (triangles) represent the observed study outcome.

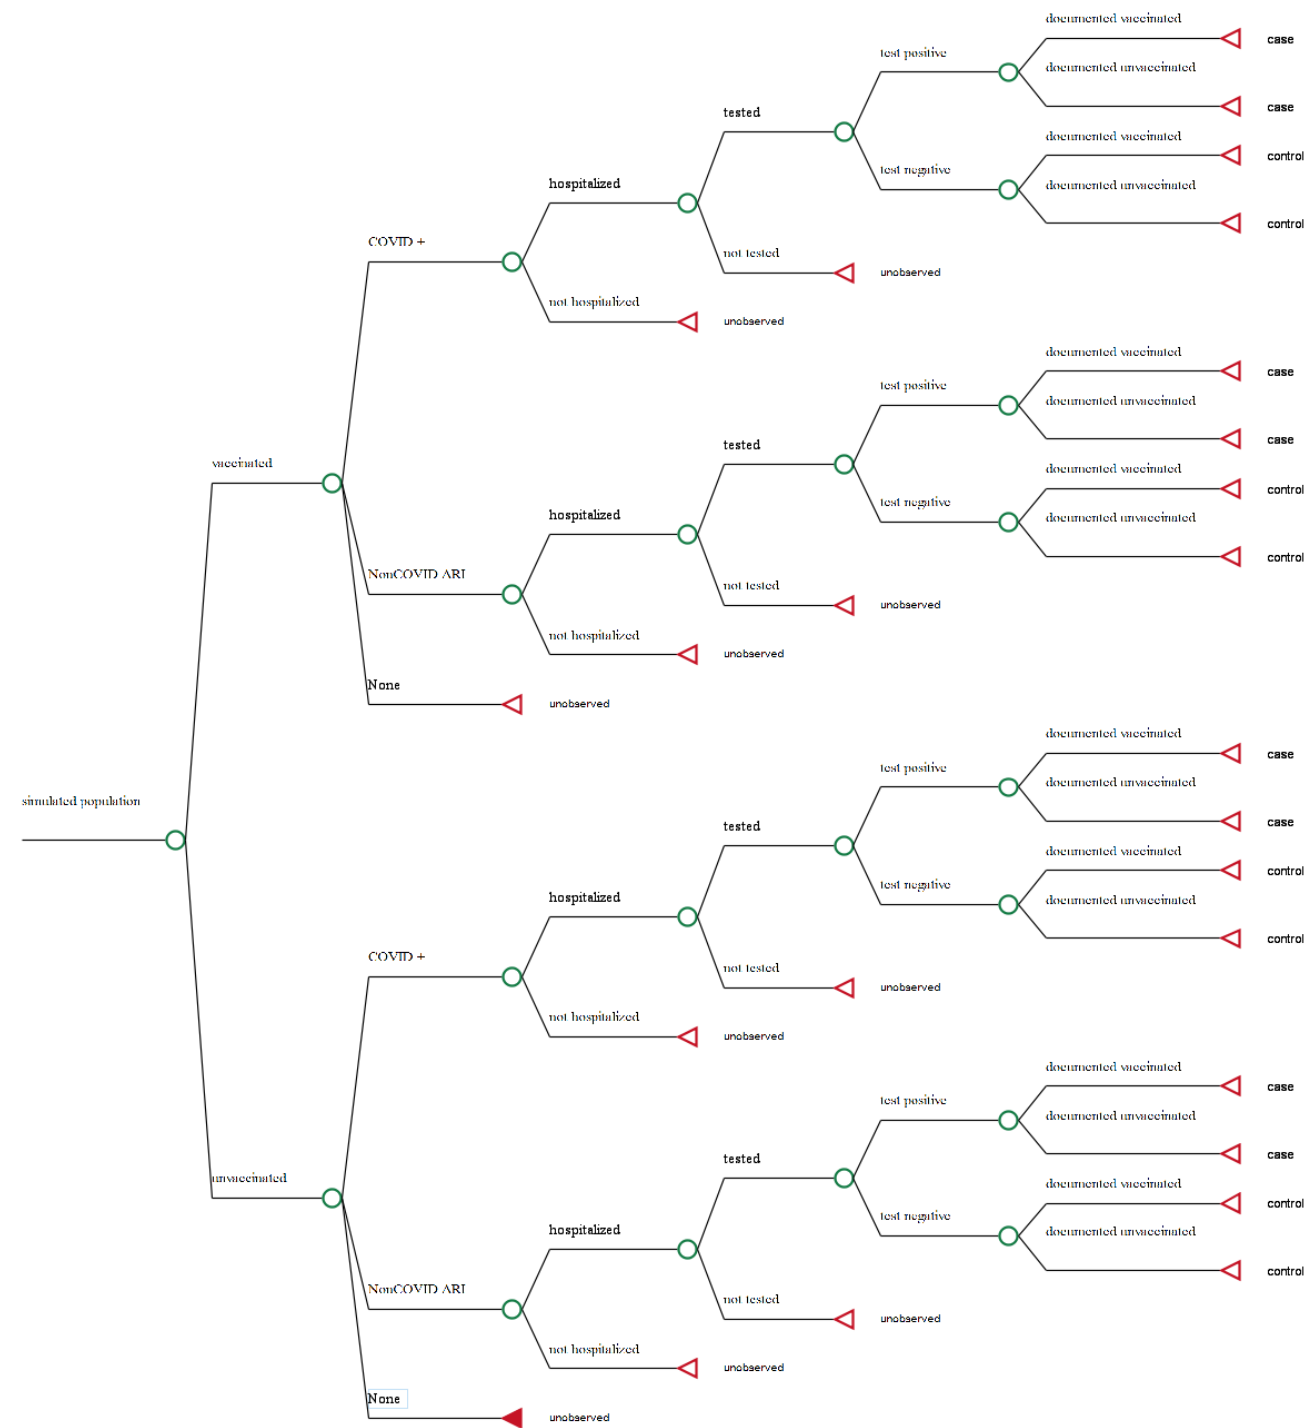

EXPECTED VE = 95%, lower burden scenario

Figure 2. Observed VE with imperfect vaccine documentation sensitivity (expected VE = 95%); lower burden scenario

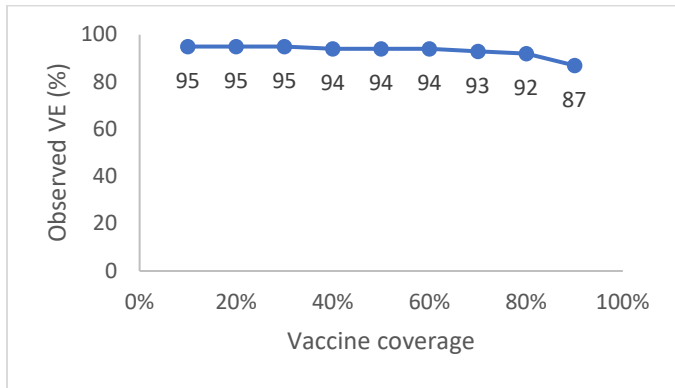

Figure 3. Observed VE with imperfect vaccine documentation specificity (expected VE = 95%); lower burden scenario

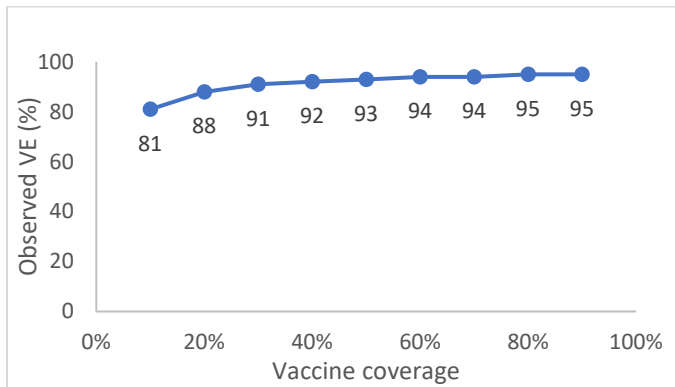

Figure 4. Observed VE with imperfect vaccine documentation and imperfect clinical tests (expected VE = 95%); lower burden scenario

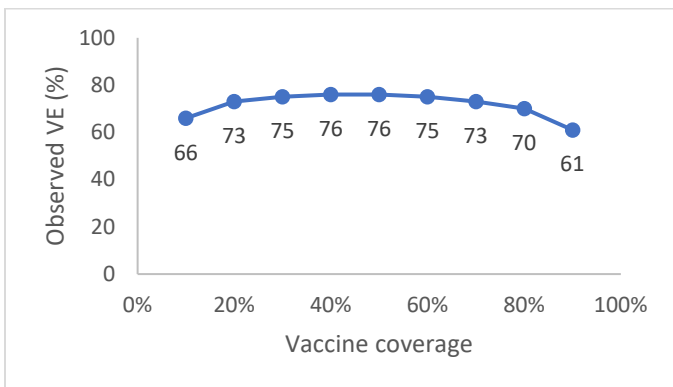

EXPECTED VE = 75%, lower burden scenario

Figure 5. Observed VE with imperfect vaccine documentation sensitivity (expected VE = 75%); lower burden scenario

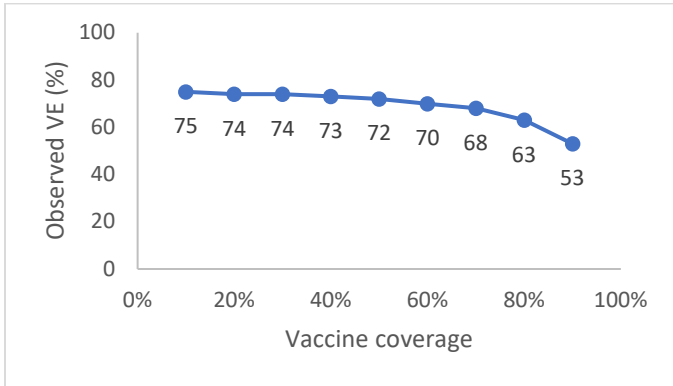

Figure 6. Observed VE with imperfect vaccine documentation specificity (expected VE = 75%); lower burden scenario

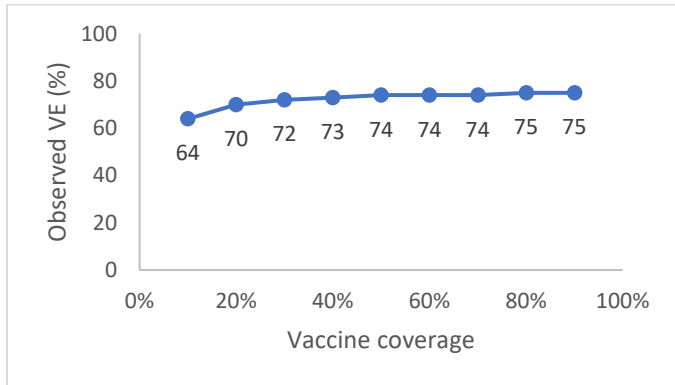

Figure 7. Observed VE with imperfect vaccine documentation and imperfect clinical tests (expected VE = 75%); lower burden scenario

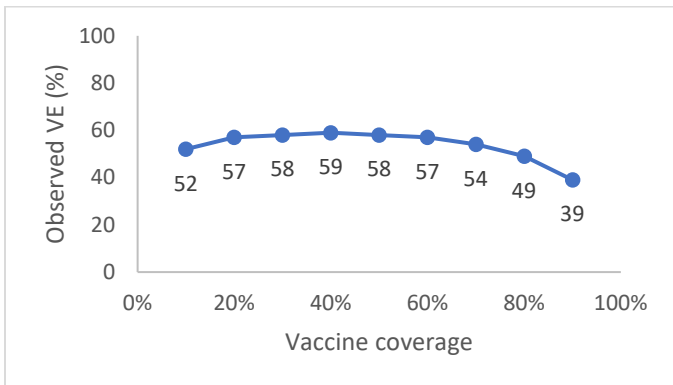

EXPECTED VE = 50%, lower burden scenario

Figure 8. Observed VE with imperfect vaccine documentation sensitivity (expected VE = 50%); lower burden scenario

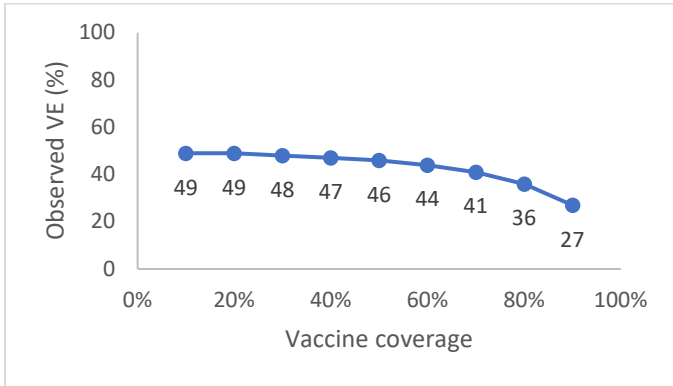

Figure 9. Observed VE with imperfect vaccine documentation specificity (expected VE = 50%); lower burden scenario

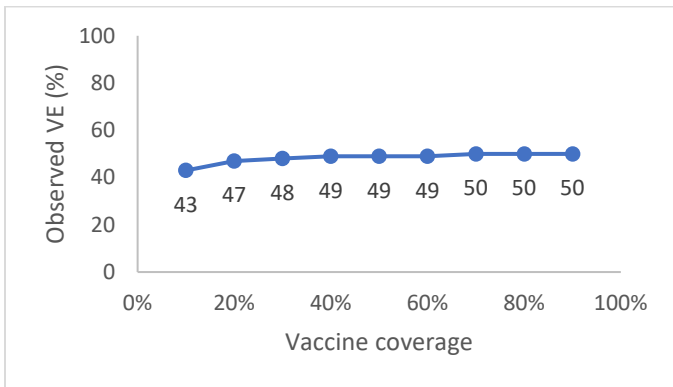

Figure 10. Observed VE with imperfect vaccine documentation and imperfect clinical tests (expected VE = 50%); lower burden scenario

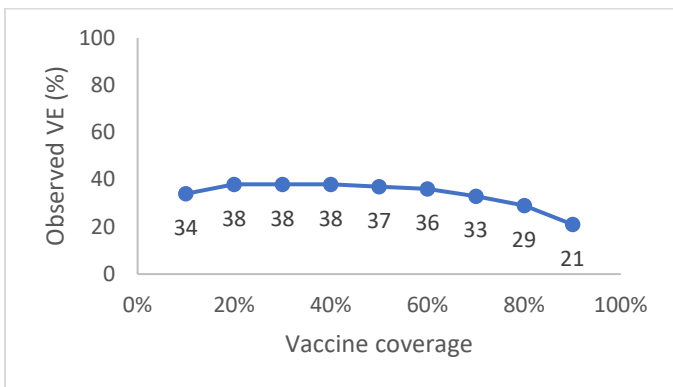

EXPECTED VE = 95%, higher burden scenario

Figure 11. Observed VE with imperfect vaccine documentation sensitivity (expected VE = 95%); higher burden scenario

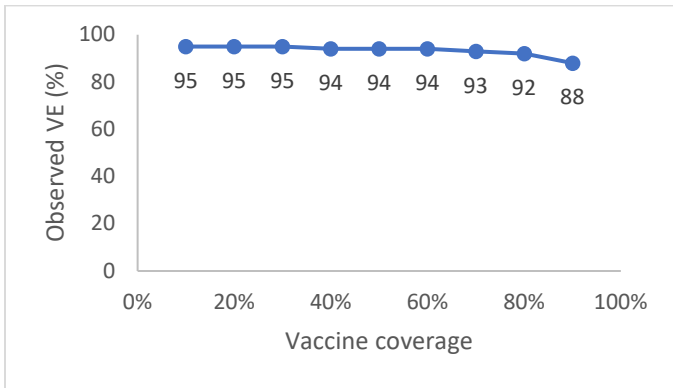

Figure 12. Observed VE with imperfect vaccine status specificity only (expected VE = 95%); higher burden scenario

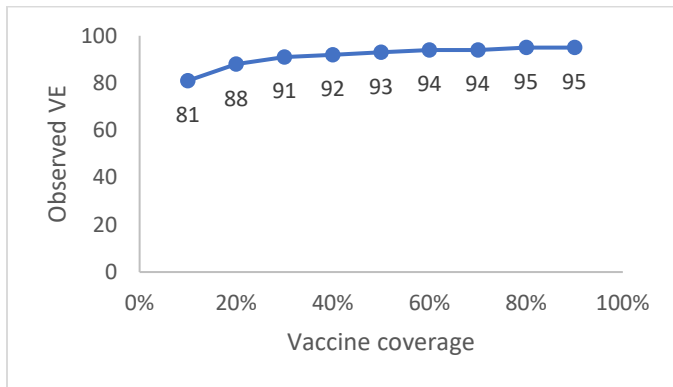

Figure 13. Observed VE with imperfect vaccine documentation and imperfect clinical tests (expected VE = 95%); higher burden scenario

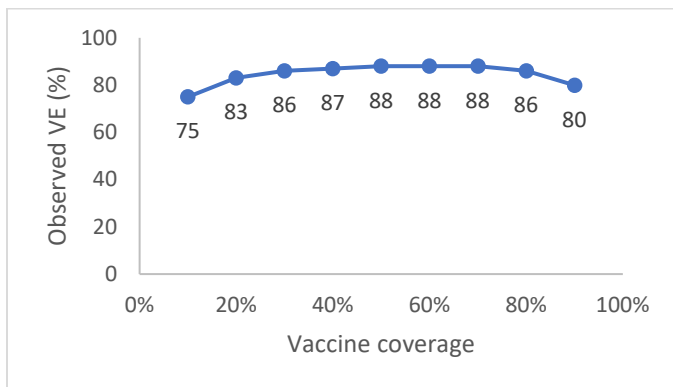

EXPECTED VE = 75%, higher burden scenario

Figure 14. Observed VE with imperfect vaccine documentation sensitivity (expected VE = 75%); higher burden scenario



Figure 15. Observed VE with imperfect vaccine documentation specificity (expected VE = 75%); higher burden scenario

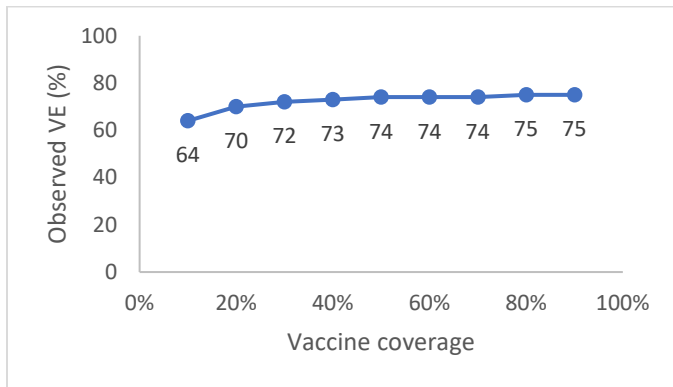

Figure 16. Observed VE with imperfect vaccine documentation and imperfect clinical tests (expected VE = 75%); higher burden scenario

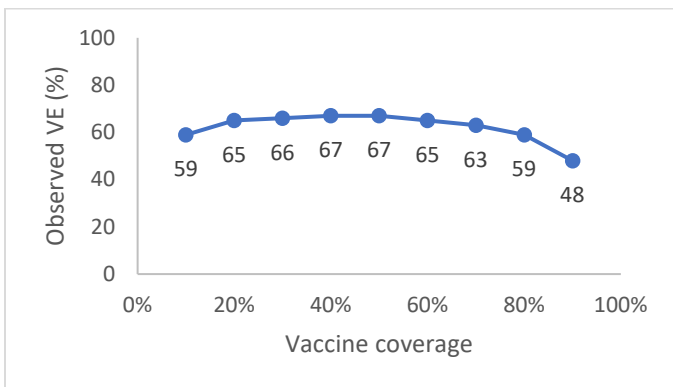



EXPECTED VE = 50%, higher burden scenario

Figure 17. Observed VE with imperfect vaccine documentation sensitivity (expected VE = 50%); higher burden scenario



Figure 18. Observed VE with imperfect vaccine documentation specificity (expected VE = 50%); higher burden scenario

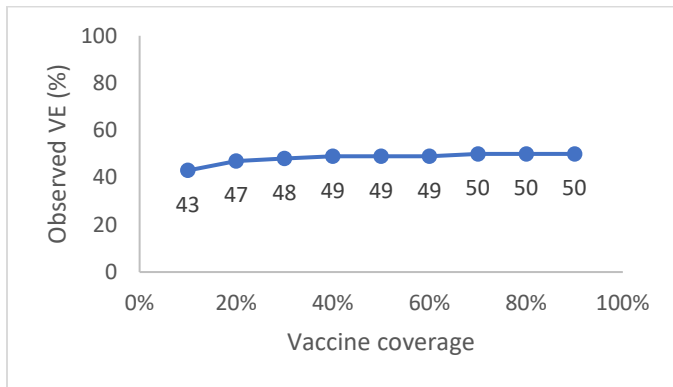

Figure 19. Observed VE with imperfect vaccine documentation and imperfect clinical tests (expected VE = 50%); higher burden scenario

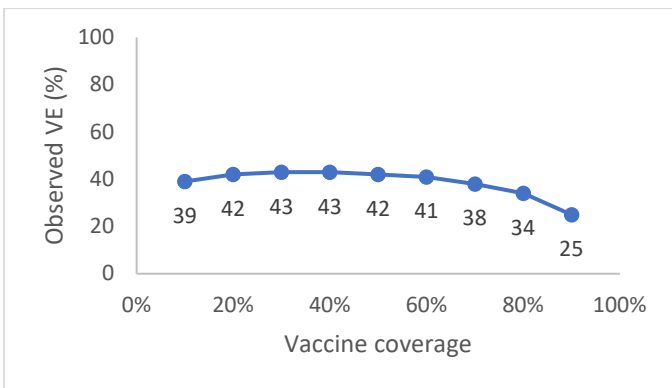

## Tables

Table 1. Performance of molecular and rapid molecular tests for detection of SARS-CoV-2

| Source                                      | Test assessed                              | Comparator                                  | Type of specimen/swab <sup>2</sup>  | Sensitivity (95% CI) | Specificity (95% CI) |
|---------------------------------------------|--------------------------------------------|---------------------------------------------|-------------------------------------|----------------------|----------------------|
| Dinnes 2020                                 |                                            |                                             |                                     |                      |                      |
|                                             | <b>1) ID NOW (Abbott laboratories)</b>     | RT-PCR                                      |                                     |                      |                      |
|                                             | <i>a. Smithgall 2020</i>                   |                                             | mixed                               | 0.74 (0.63, 0.83)    | 1.00 (0.86, 1.00)    |
|                                             | <i>b. Rhoads 2020</i>                      |                                             | mixed                               | 0.94 (0.87, 0.98)    | Not estimable        |
|                                             | <i>c. Mitchell 2020</i>                    |                                             | NP                                  | 0.72 (0.57, 0.84)    | 1.00 (0.78, 1.00)    |
|                                             | <i>d. Moore 2020</i>                       |                                             | NP                                  | 0.79 (0.71, 0.86)    | 1.00 (0.95, 1.00)    |
|                                             | <i>e. Zhen 2020</i>                        |                                             | NP                                  | 0.88 (0.76, 0.95)    | 1.00 (0.93, 1.00)    |
|                                             | <i>f. Harrington 2020</i>                  |                                             | nasal                               | 0.75 (0.68, 0.81)    | 0.99 (0.98, 1.00)    |
|                                             | <b>2) Xpert Xpress (Cepheid Inc)</b>       |                                             |                                     |                      |                      |
|                                             | <i>a. Smithgall 2020</i>                   |                                             | mixed                               | 0.99 (0.94, 1.00)    | 0.92 (0.74, 0.99)    |
|                                             | <i>b. Wolters 2020</i>                     |                                             | mixed                               | 1.00 (0.94, 1.00)    | 1.00 (0.88, 1.00)    |
|                                             | <i>c. Moran 2020</i>                       |                                             | mixed                               | 1.00 (0.92, 1.00)    | 0.98 (0.91, 1.00)    |
|                                             | <i>d. Broder 2020</i>                      |                                             | NP                                  | 0.97 (0.85, 1.00)    | Not estimable        |
|                                             | <i>e. Zhen 2020</i>                        |                                             | NP                                  | 0.98 (0.91, 1.00)    | 1.00 (0.93, 1.00)    |
|                                             | <i>f. Lieberman 2020</i>                   |                                             | NP                                  | 1.00 (0.75, 1.00)    | 1.00 (0.75, 1.00)    |
|                                             | <i>g. Loeffelholz 2020</i>                 |                                             | mixed                               | 1.00 (0.97, 1.00)    | 0.96 (0.93, 0.98)    |
|                                             | 3) Accula (Mesa Biotech Inc.)              | RT-PCR                                      | throat swab and nasal swab per test | 0.68 (0.53, 0.81)    | 1.00 (0.93, 1.00)    |
| 4) SAMBA II (Diagnotics for the Real World) | RT-PCR                                     | combined nose and throat swabs, NP/OP swabs | 0.99 (0.94, 1.00)                   | 0.96 (0.90, 0.99)    |                      |
| KPNW Testing                                | 1) Roche cobas SARS-CoV-2 & Influenza A/B  | Hologic Aptima CoV-2 Assay                  | NP swab, nasal swab, nasal wash     | 1.00                 | 1.00                 |
|                                             | 2) Cepheid Xpert Xpress SARS-CoV-2/Flu/RSV | Quidel Lyra Assay                           | NP swab, nasal wash                 | 0.93                 | 1.00                 |
|                                             | 3) Aptima SARS-CoV-2 Assay Hologic         | Quidel Lyra and Cepheid                     | NP swab, nasal Swab                 | 0.96                 | 1.00                 |

CI = confidence interval; NP = nasopharyngeal; OP = oral pharyngeal

Mixed = Any of the following swabs: NP swab, Nasal wash, OP swab, or throat swab

Table 2. Sensitivity of electronic sources of vaccination documentation for influenza vaccination compared to self-report as the gold standard

| Source      | Age group | Comparator                          | Sensitivity | 95% LCL | 95% UCL |
|-------------|-----------|-------------------------------------|-------------|---------|---------|
| Sy 2010     | 50-64 yr  | EMR vs self-report                  | 0.73        | 0.66    | 0.81    |
| Sy 2010     | 65-79 yr  | EMR vs self-report                  | 0.86        | 0.80    | 0.92    |
| Irving 2009 | ≥6 months | registry vs adjudicated self-report | 0.95        | 0.93    | 0.96    |
| Greene 2009 | 50-64 yr  | electronic records vs self-report   | 0.68        | 0.65    | 0.71    |
| Greene 2009 | 65-79 yr  | electronic records vs self-report   | 0.81        | 0.79    | 0.83    |

EMR = electronic medical record; LCL = lower confidence limit; UCL = upper confidence limit

Table 3. Specificity of electronic sources of vaccination documentation for influenza vaccination compared to self-report as the gold standard

| Source      | Age group | Comparator              | Specificity | 95% LCL | 95% UCL |
|-------------|-----------|-------------------------|-------------|---------|---------|
| Sy 2010     | 50-64 yr  | EMR vs self-report      | 1.00        | 1.00    | 1.00    |
| Sy 2010     | 65-79 yr  | EMR vs self-report      | 0.98        | 0.94    | 1.00    |
| Irving 2009 | 5-49 yr   | registry vs self-report | 0.99        | 0.98    | 0.99    |
| Irving 2009 | ≥50 yr    | registry vs self-report | 0.97        | 0.94    | 0.99    |

EMR = electronic medical record; LCL= lower confidence limit; UCL = upper confidence limit

Table S4. Estimated observed VE for full vaccination assuming an expected VE of 95%

| Sources of bias included                                                                                                                         | Observed VE for full vaccination (assuming expected VE = 95%) |
|--------------------------------------------------------------------------------------------------------------------------------------------------|---------------------------------------------------------------|
| Imperfect test sensitivity only                                                                                                                  | 95%                                                           |
| Imperfect test specificity only                                                                                                                  | 90%                                                           |
| Both imperfect test sensitivity and specificity                                                                                                  | 90%                                                           |
| Imperfect vaccine documentation sensitivity only                                                                                                 | 95%                                                           |
| Imperfect vaccine documentation specificity only                                                                                                 | 92%                                                           |
| Both imperfect vaccine documentation sensitivity and specificity                                                                                 | 91%                                                           |
| Imperfect test sensitivity, imperfect test specificity, imperfect vaccine documentation sensitivity, imperfect vaccine documentation specificity | 85%                                                           |

**Section S5. Supplemental Results (Other Results not in Main Manuscript)**

## **A. Sample of Medical Encounters**

### **1. Differences in medical event exclusions by Network partner**

Graphics that illustrate the location of Network hospitals and ED/UC facilities are presented in Figure S11 and Figure S12. Breakdowns of the inclusion and exclusion steps by Network partner are presented in Table S3 for hospitalizations and in Table S5 for ED/UC. The proportion of hospitalizations that occurred after the dates of age-specific COVID-19 vaccine eligibility varied by partner, ranging from 28% at RG to 54% at KPNW. RG and IH excluded a higher proportion of hospitalizations due to the absence of molecular testing for SARS-CoV-2 within the eligible testing window (45% for RG and 40% at IH compared to a range of 1%-8% for other partners). HP had a higher percentage of encounters excluded for indeterminate vaccination status (9% for HP versus a range of 3%-6% for other partners). For the combined sample, 10% of hospitalizations occurred within 30 days of discharge and were combined into a single medical event; 0.6% of ED or UC encounters occurred within 24 hours and were combined into a single medical event.

Figure S11. VISION VE Map of Hospital Locations

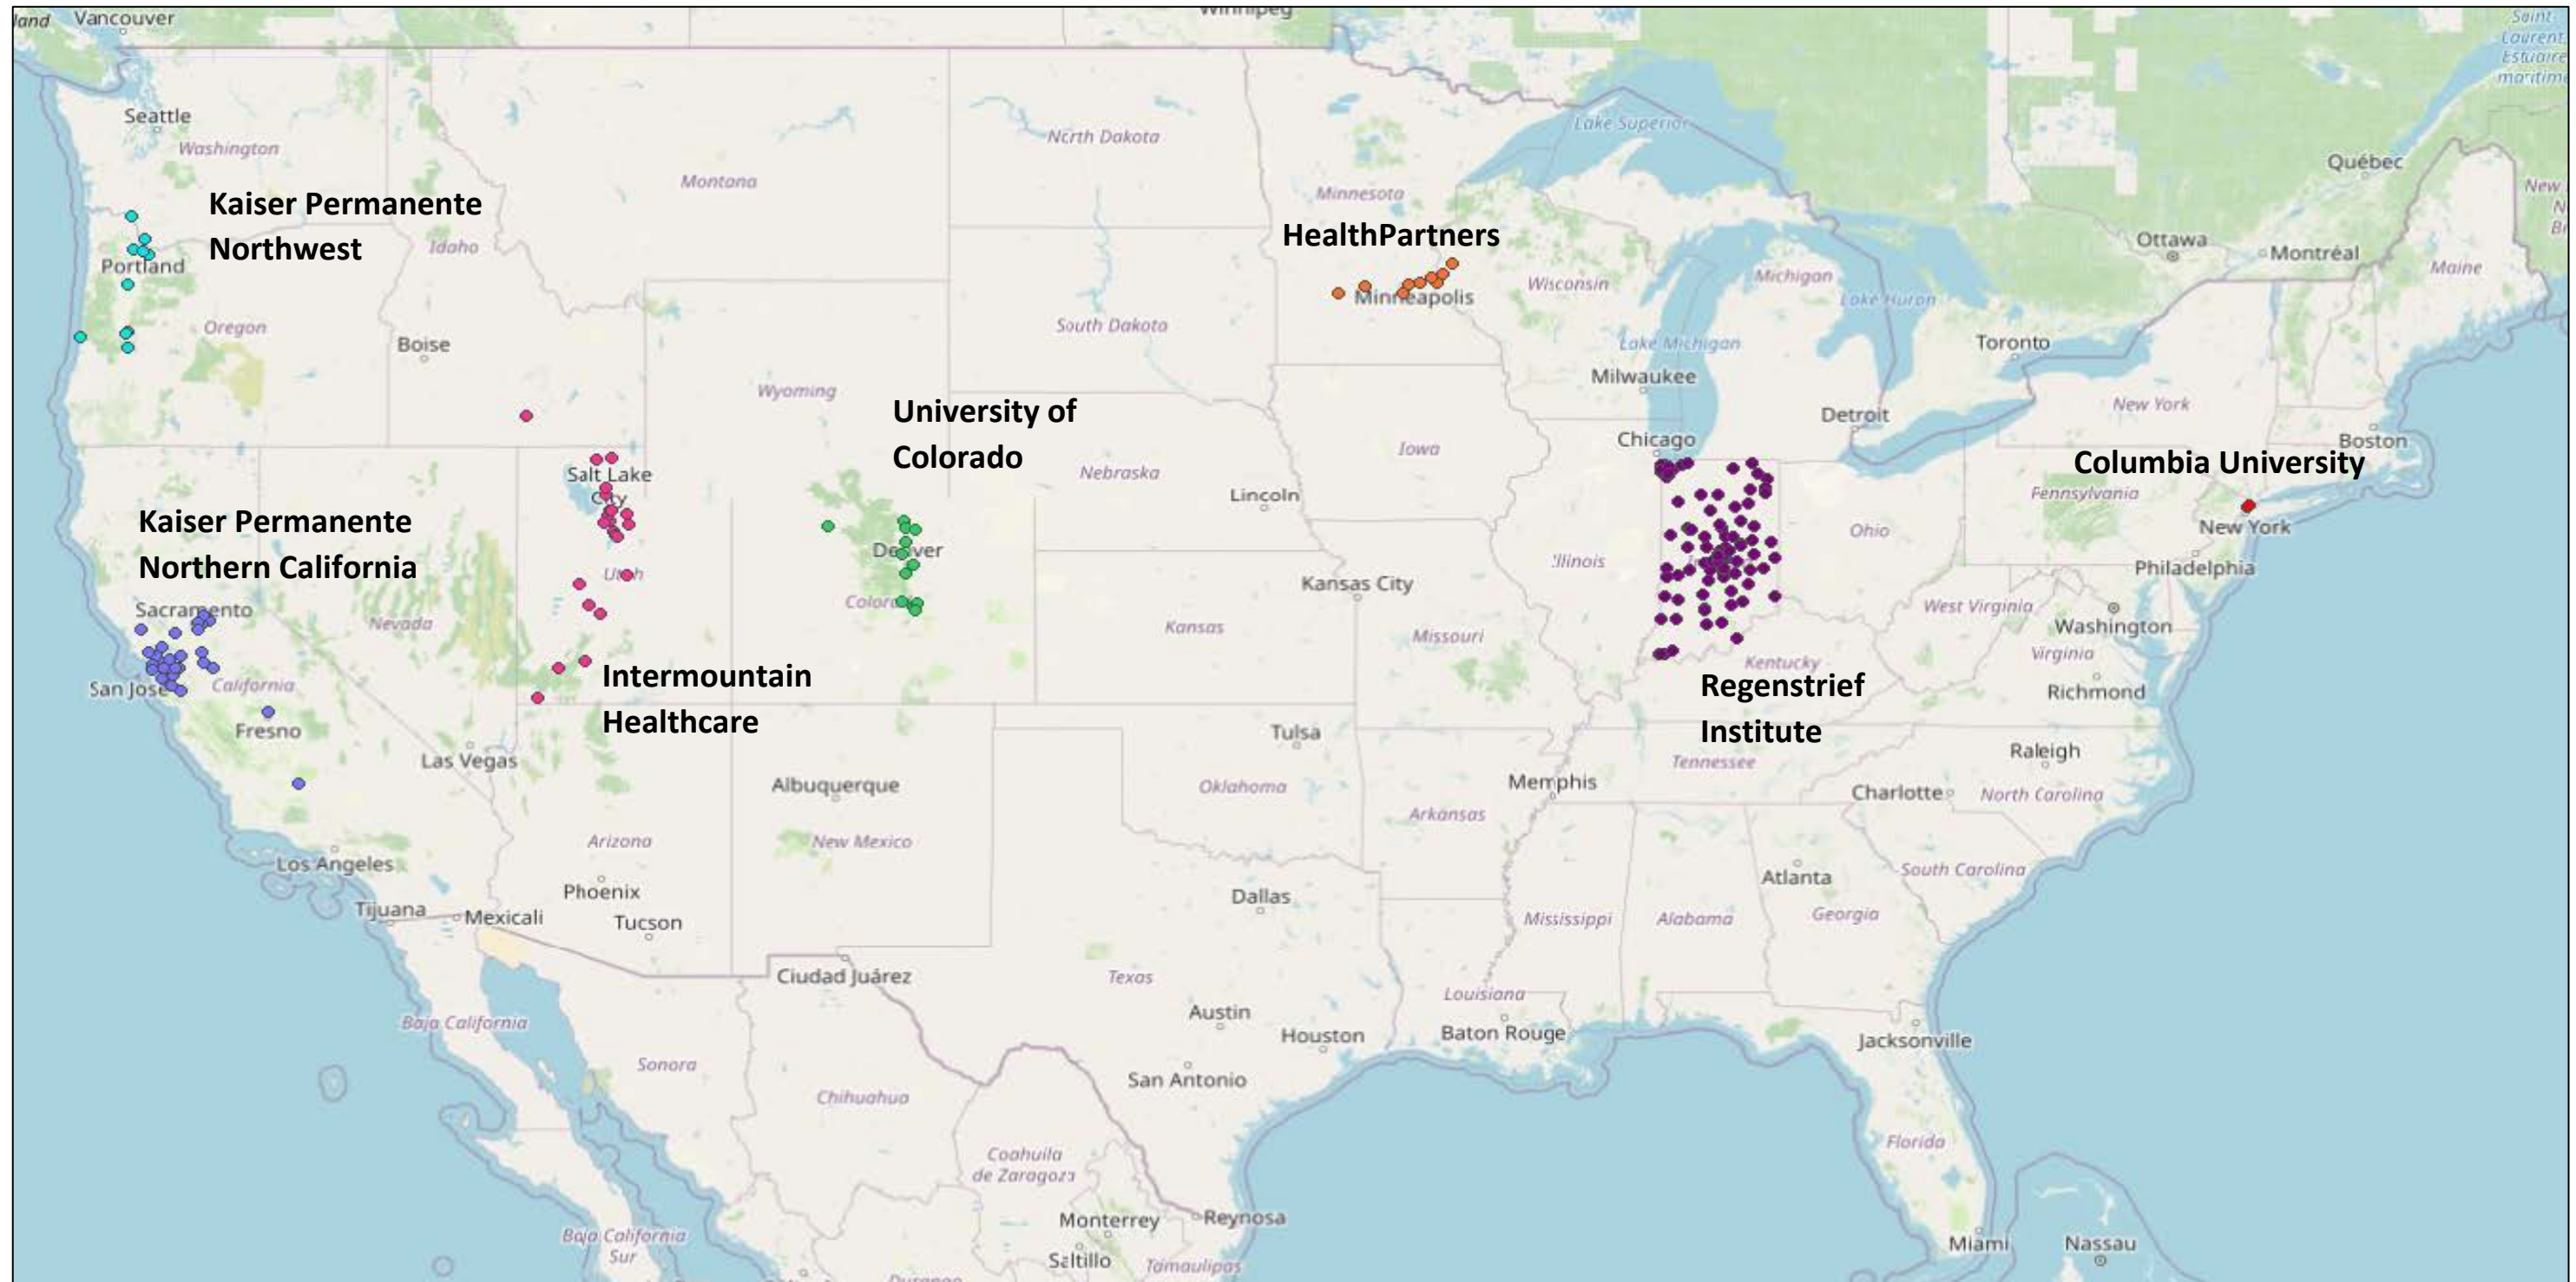

Figure S12. VISION VE Map of ED and UC facilities' Location

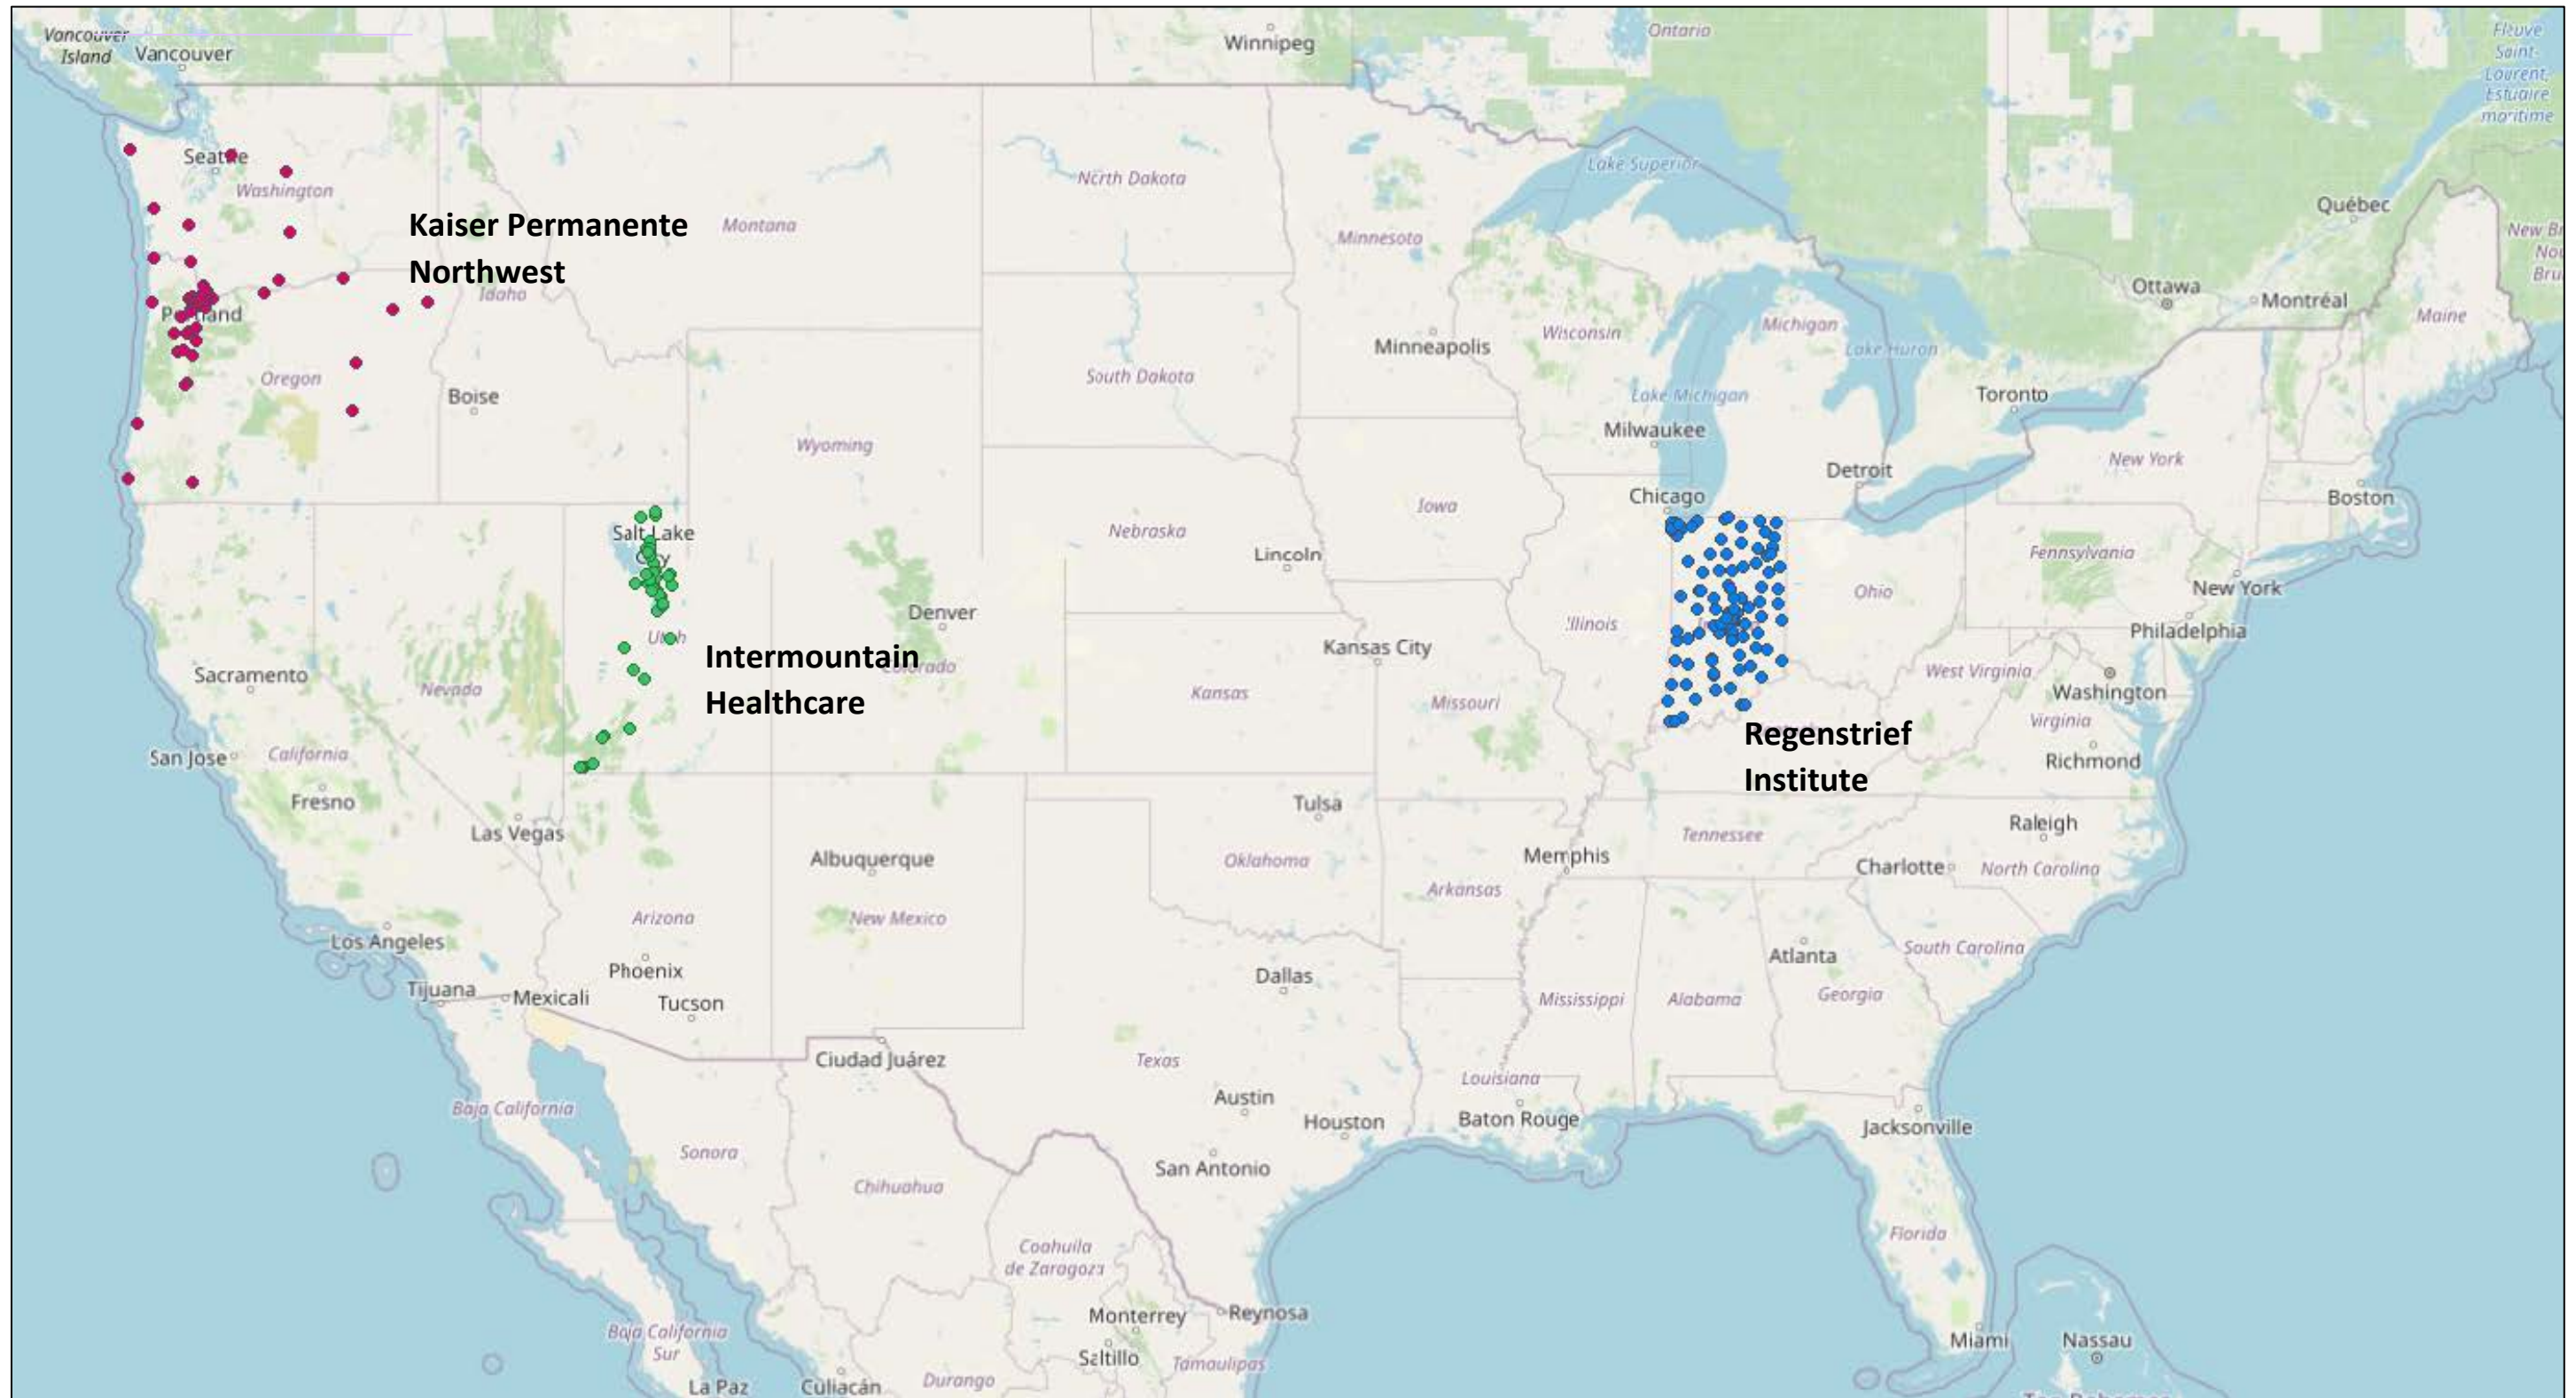

## 2. Differences in Race and Ethnicity by Network partner

All partners had inpatient populations that were majority White race (range = 56%-96%). The percentage of hospitalizations among Black patients was highest at CUIMC (42%), RG (13%) and KPNC (11%). The proportion of the patients who self-identified as Hispanic was highest at KPNC (20%) and CUIMC (55%) and was <10% for all other partners (range = 2%-10%). At CUIMC, a high proportion of inpatient encounters did not have a reported value for race (50% versus 2%-17% at other sites). See Tables\_S6-S11 for partner-specific results.

Across all partners, the proportion of White patients increased with age in both the inpatient population (77% to 84% for those aged 50-64 and  $\geq 85$  years respectively) and ED/UC population (88% to 96% for those aged 50-64 and  $\geq 85$  years respectively). The proportion of Black patients decreased with age in both the inpatient population (16% to 8% for those aged 50-64 and  $\geq 85$  respectively) and ED/UC population (8% to 2% for those aged 50-64 and  $\geq 85$  years respectively). The proportion of the population that identifies as Hispanic decreased with age in the inpatient (16% to 12% for those aged 50-64 and  $\geq 85$  years respectively) and ED/UC populations (9% to 3% for those aged 50-64 and  $\geq 85$  years respectively) (data not shown).



### 3. COVID-19 Vaccine Products and Manufacturer

Proportions of vaccine manufacturer differed by site (Table S6-S11). The proportion of vaccinated encounters associated with Pfizer-BioNTech vaccine ranged from 42% at RG to 71% at CUIMC in the inpatient setting and from 43% at RG to 67% at KPNW in the ED/UC setting. RG was the only partner with more patients vaccinated with Moderna vaccine (55% of hospitalizations with a vaccinated patient and 53% of ED/UC encounters with a vaccinated patient) than Pfizer-BioNTech vaccine (42% and 43% respectively). All but one partner (UCO) had at least one encounter of an individual fully vaccinated with the J&J vaccine, ranging from 1% to 5% of vaccinated inpatient encounters and 4% to 5% of ED/UC encounters across partners.

## **B. Laboratory-confirmed COVID-19-associated Medical Encounters**

The association between SARS-CoV-2 test results and patient characteristics are presented for the combined sample in Table 2 and for each Network partner in Table S6-S11. SARS-CoV-2 positivity declined with age among both hospitalized and ED/UC encounters; this was noted consistently across Network partners. The lower percentages of medical events that were SARS-CoV-2 positive among White or Other race patients, non-Hispanic patients, and those with non-respiratory chronic conditions noted for the combined sample were also noted across most but not all study partners when examined separately.

The vast majority (>88%) of CLI hospitalizations and ED/UC encounters associated with a SARS-CoV-2 positive test result corresponded to  $\geq 1$  clinical diagnosis ICD code in the hospital discharge or ED/UC medical record (by partner see Table S6-S11). The remaining  $\leq 12\%$  of medical events among SARS-CoV-2 positives were included in the sample because  $\geq 1$  ICD code for a sign or symptom associated with COVID-19 was listed for the event. In contrast, among SARS-CoV-2 negative medical events, 25,706/37,231 (69%) of hospitalizations and 8,740/18,271 (48%) of ED/UC encounters corresponded to  $\geq 1$  clinical diagnosis ICD code (by partner see Table S6-S11). Thus, a greater proportion of SARS-CoV-2 negative medical events were included because of CLI signs or symptoms compared to SARS-CoV-2 positive medical events. The potential that these differences may introduce bias in VE estimates is examined in VE sensitivity analyses that narrow the sample of encounters to those with similar clinical presentations as described below.

### C. COVID-19 Vaccination Status

Among both hospital and ED/UC settings, the percentage with full (mRNA) vaccination was higher among older individuals and among those of White or other race (Table 2). These trends were noted across most but not all Network partners (Tables S6-S11).

The median days (and IQR) from the most recent vaccination to the index date are listed in Table S4. As one would expect given that this evaluation occurs through June 22, 2021 and thus in the early weeks and months since COVID-19 vaccines became available to the public, a patient's index date was typically less than 2 months after their most recent vaccination date. For example, among COVID-19 cases who were fully vaccinated with a mRNA vaccine, the hospitalization index date was a median of 56 (IQR = 36-78) days after their 2<sup>nd</sup> dose of vaccine. The median days from vaccination to index date did not differ for SARS-CoV-2 positive cases versus SARS-CoV-2 negative controls.

Similarly, most unvaccinated patients had only been eligible for vaccine for less than 2 months. The median (IQR) days from vaccine eligibility to the index date was 38 (14-67) days among unvaccinated COVID-19 hospitalized patients and 40 (14-70) days among unvaccinated COVID-19 ED/UC patients.

Based on routine monitoring and reporting of vaccination by CDC in CDC COVID Data Tracker, the proportion vaccinated with at least 1 dose of COVID-19 vaccine varied by state, ranging from approximately 38% in Utah to 58% in California by the third week of May 2021. The proportion fully vaccinated for COVID-19 vaccine ranged from 26% in Utah to 44% in New York City. This information from unpublished CDC data is presented for each Network partner in Figures S13-S19.

Figures S13-19. Statewide COVID-19 Vaccine Coverage Graphs – By State

Figure S13. Statewide Total Number of COVID-19 Vaccine Doses Administered and the Cumulative Percentage of People Fully and Partially Vaccinated by COVID-19 Vaccine, New York, December 19, 2020-July 2, 2021

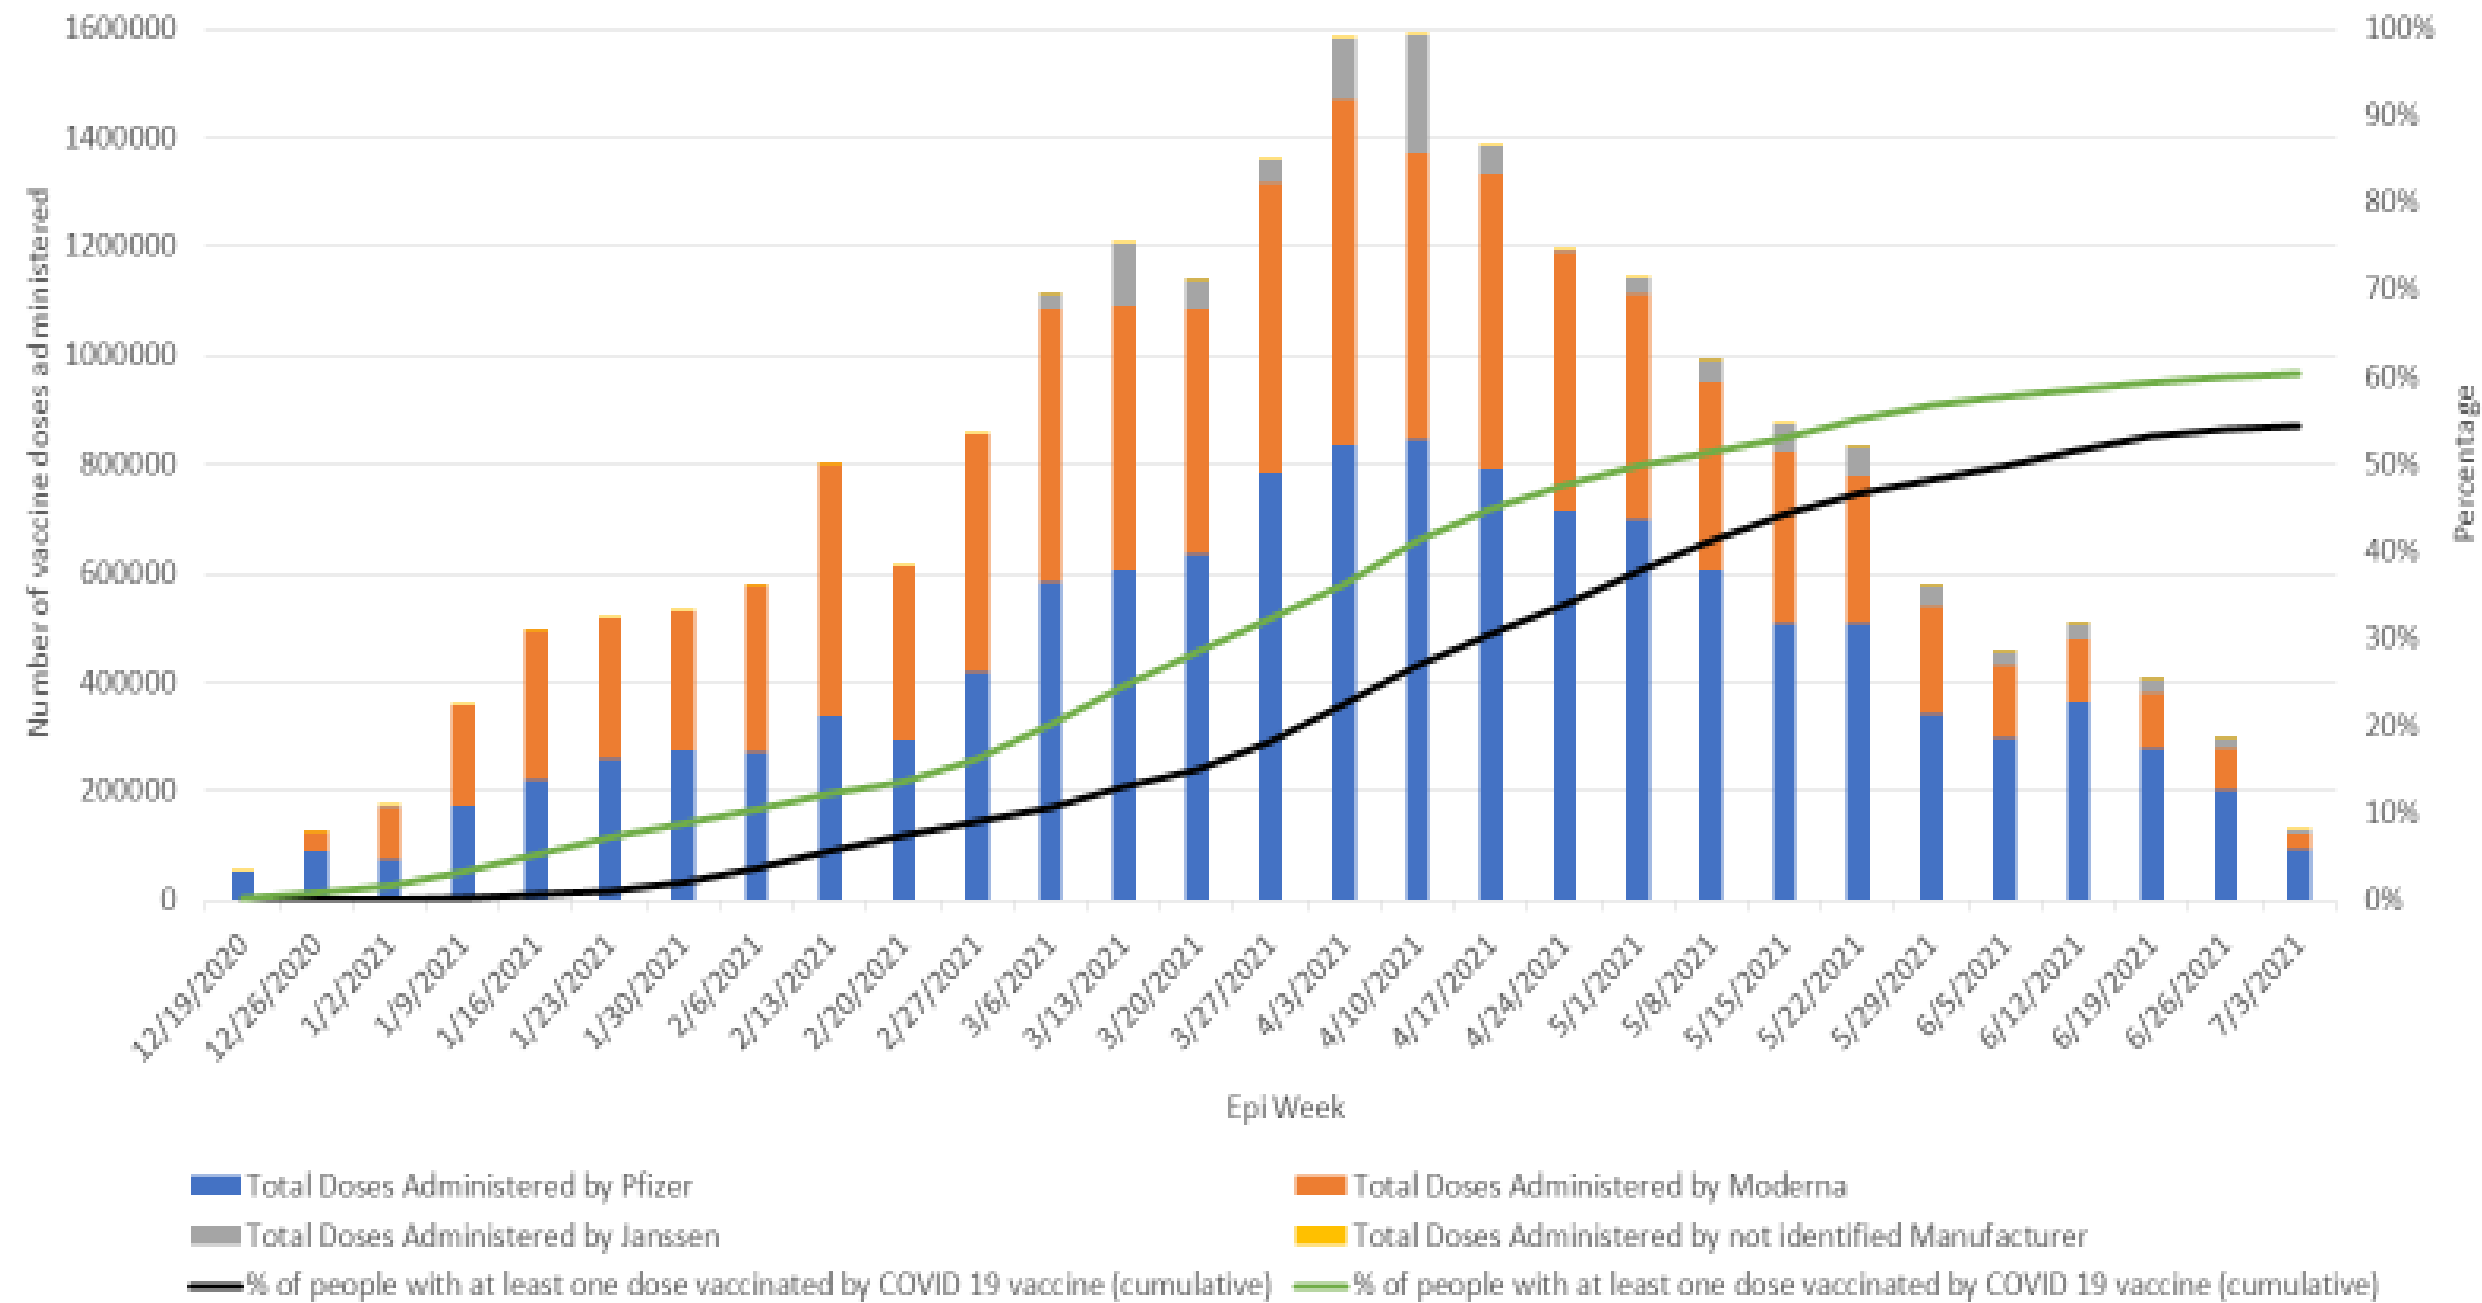

CDC, unpublished data, 2021. Data provided from the Routine Reporting and Data Visualization Team, Data Monitoring and Reporting Section, CDC Vaccine Task Force on July 2, 2021

Figure S14. Statewide Total Number of COVID-19 Vaccine Doses Administered and the Cumulative Percentage of People Fully and Partially Vaccinated by COVID-19 Vaccine, Minnesota, December 19, 2020-July 2, 2021

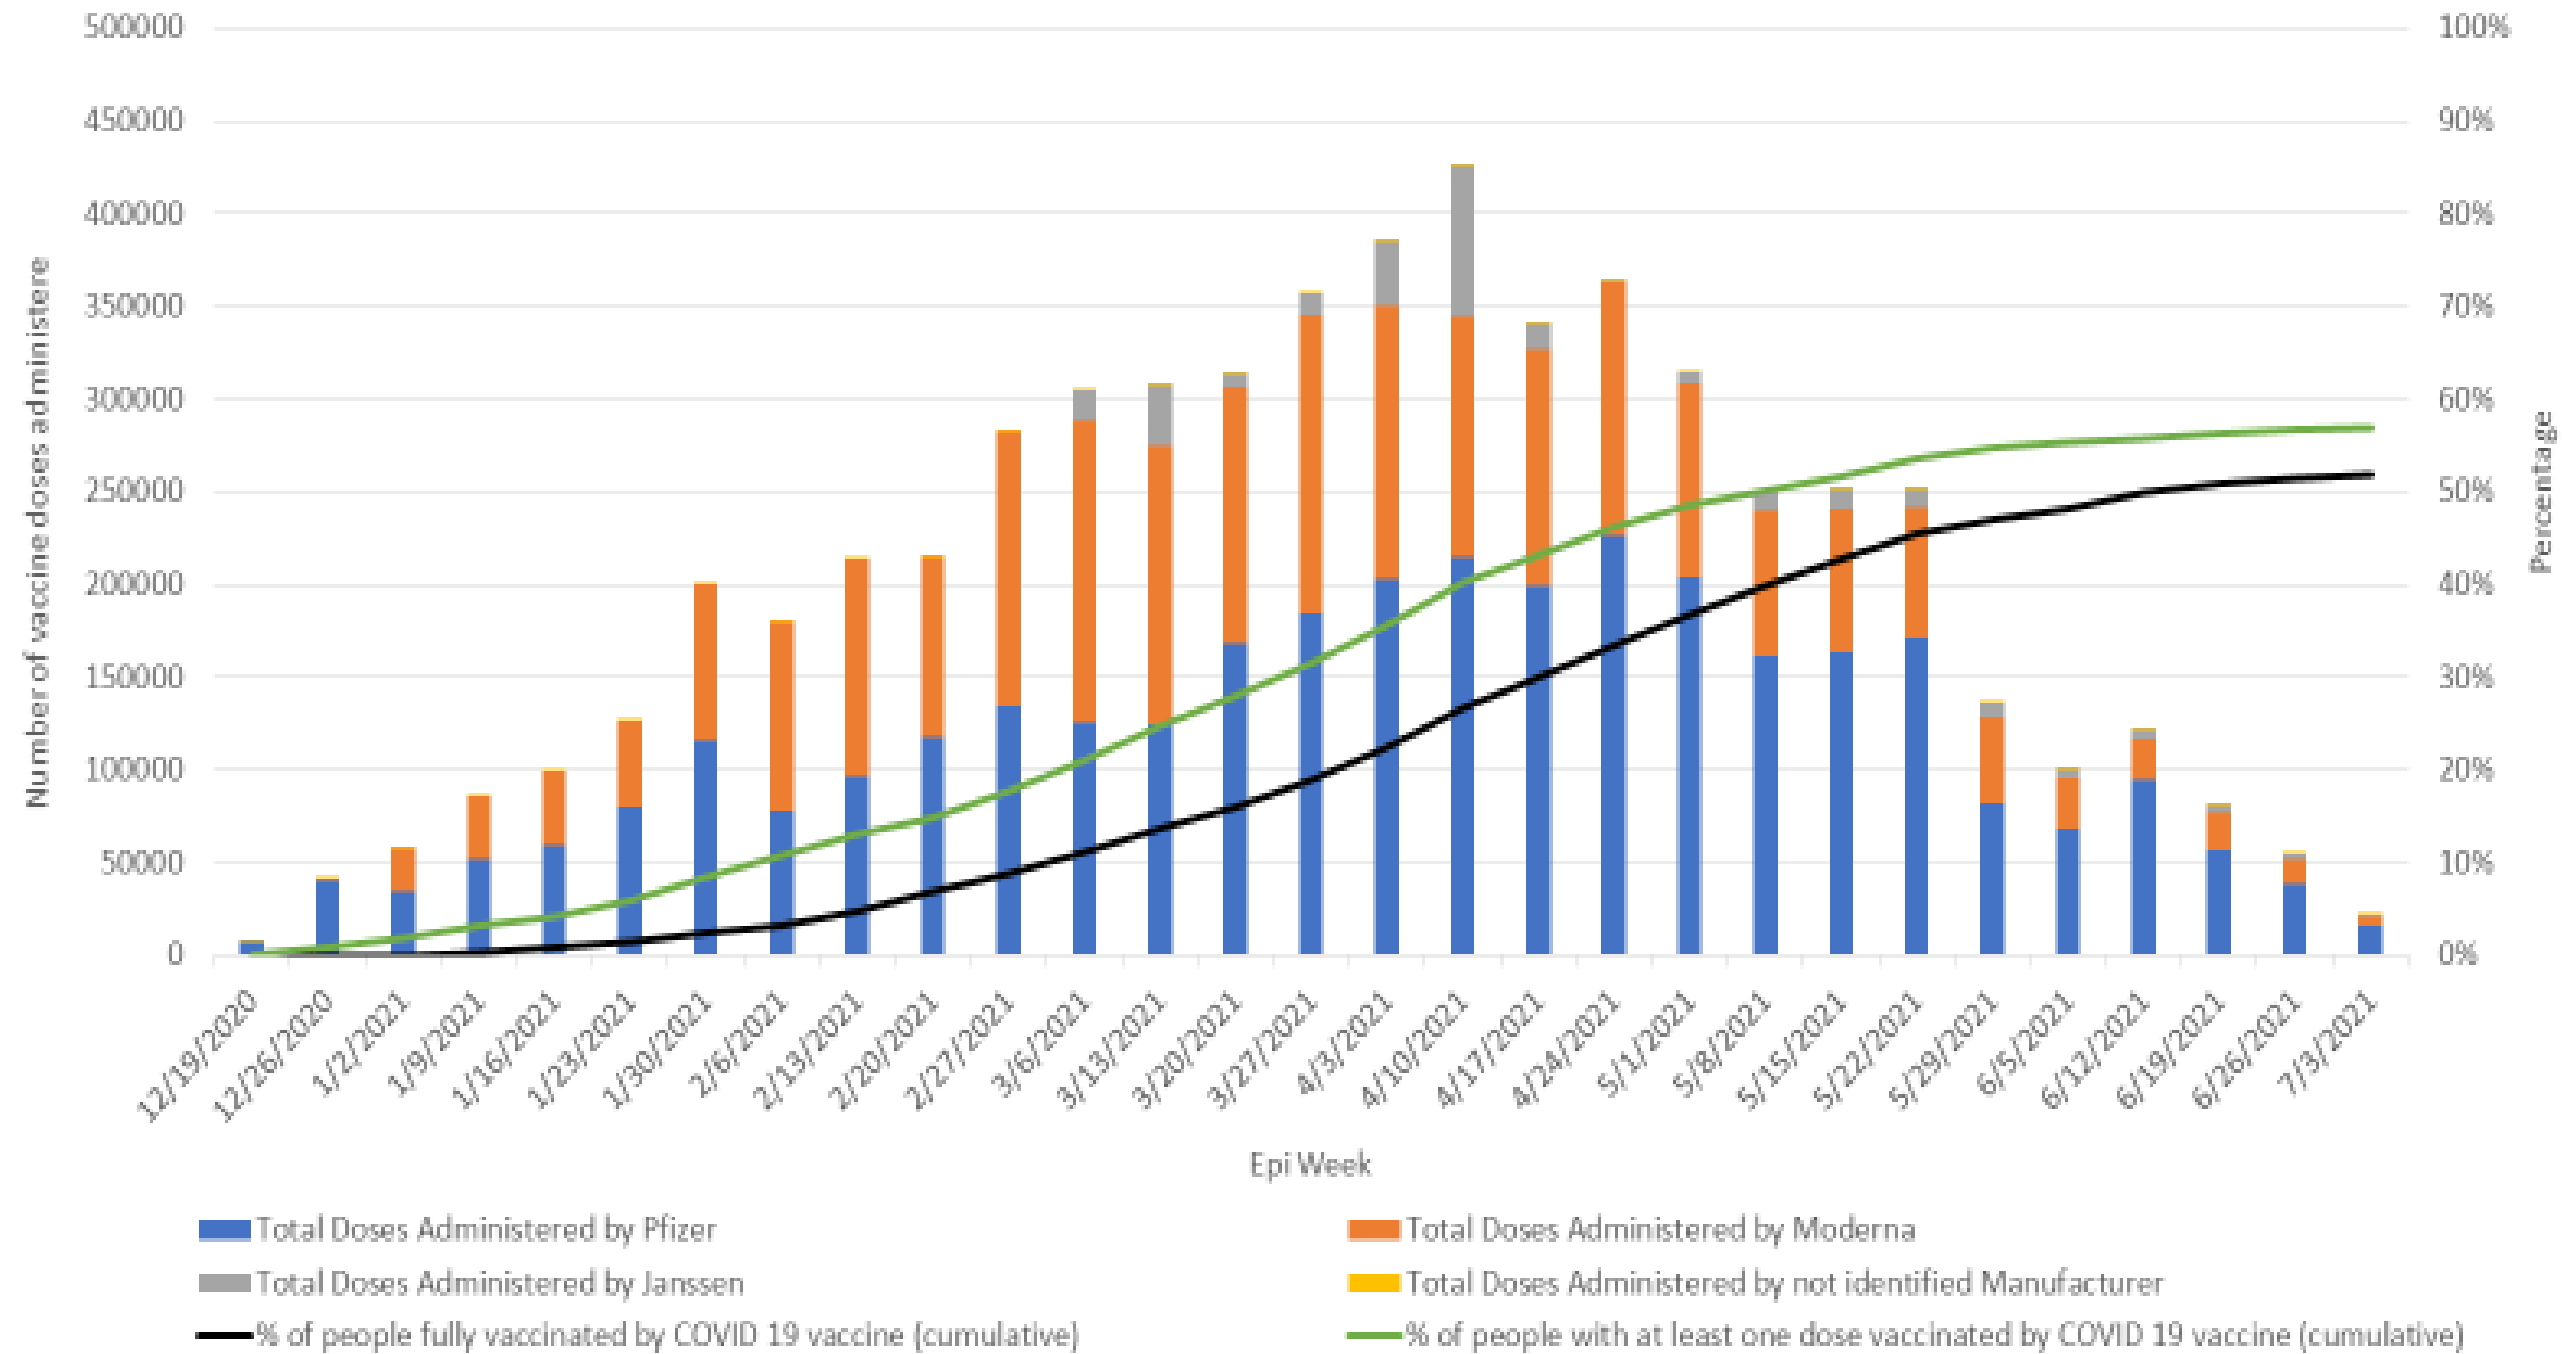

CDC, unpublished data, 2021. Data provided from the Routine Reporting and Data Visualization Team, Data Monitoring and Reporting Section, CDC Vaccine Task Force on July 2, 2021

Figure S15. Statewide Total Number of COVID-19 Vaccine Doses Administered and the Cumulative Percentage of People Fully and Partially Vaccinated by COVID-19 Vaccine, Utah, December 19, 2020-July 2, 2021

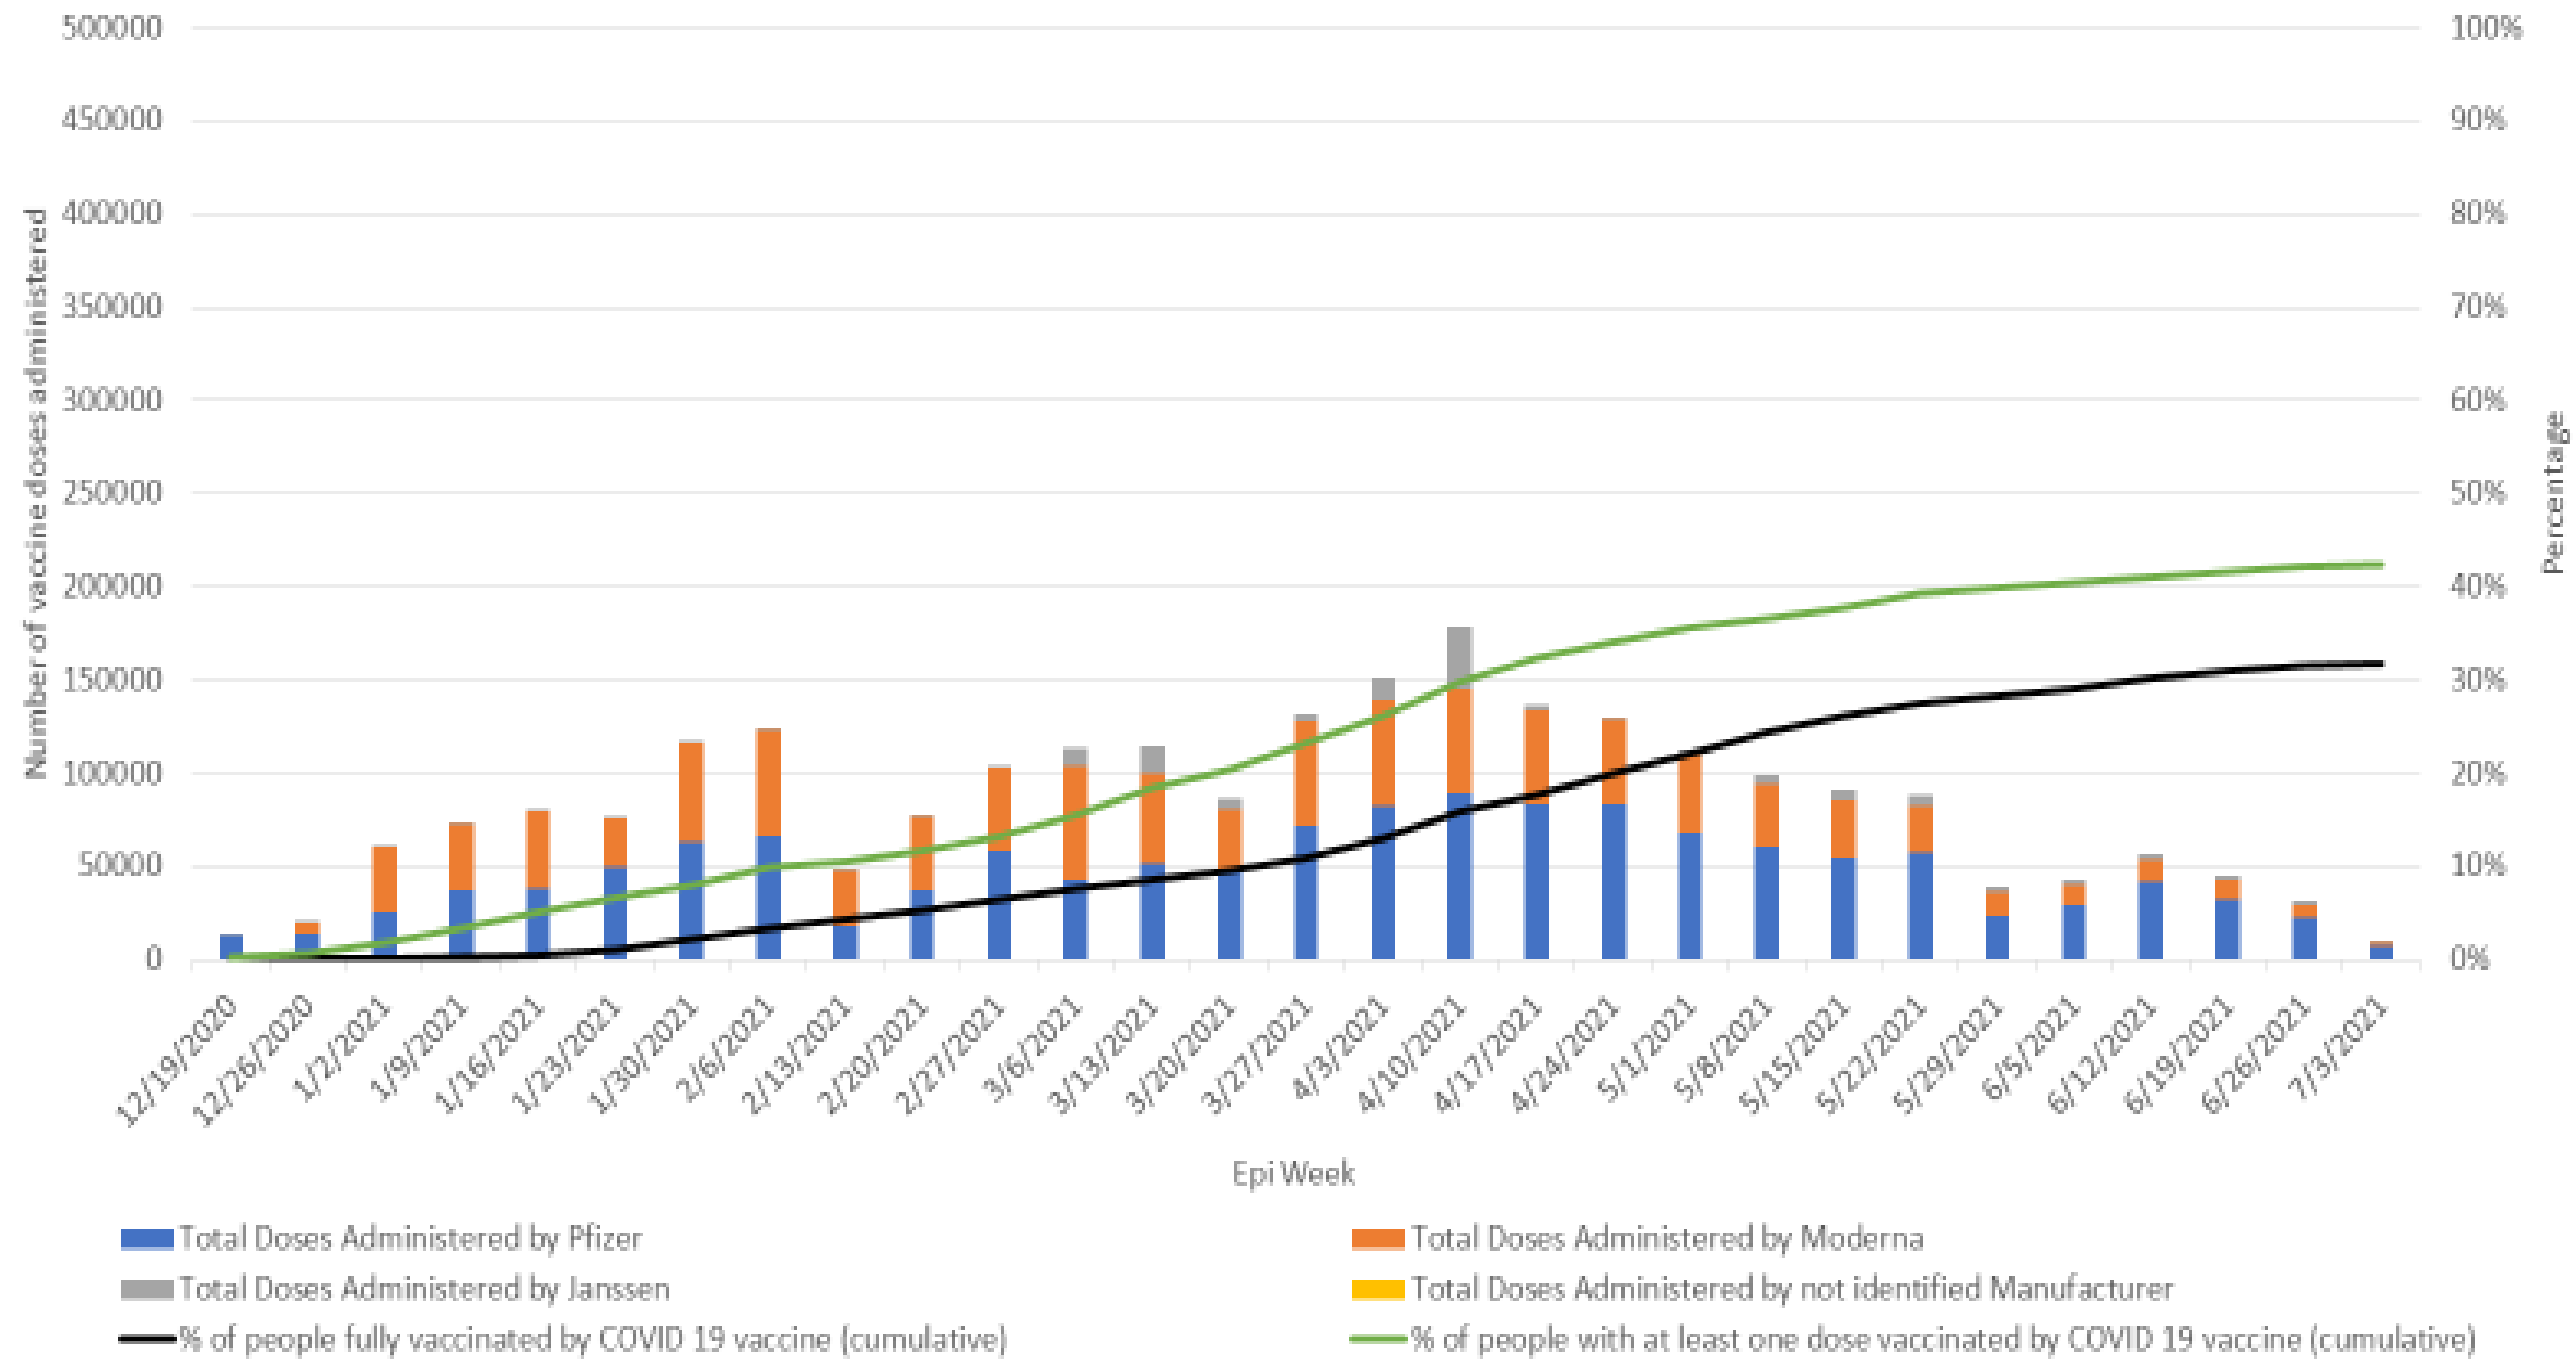

CDC, unpublished data, 2021. Data provided from the Routine Reporting and Data Visualization Team, Data Monitoring and Reporting Section, CDC Vaccine Task Force on July 2, 2021

Figure S16. Statewide Total Number of COVID-19 Vaccine Doses Administered and the Cumulative Percentage of People Fully and Partially Vaccinated by COVID-19 Vaccine, California, December 19, 2020-July 2, 2021

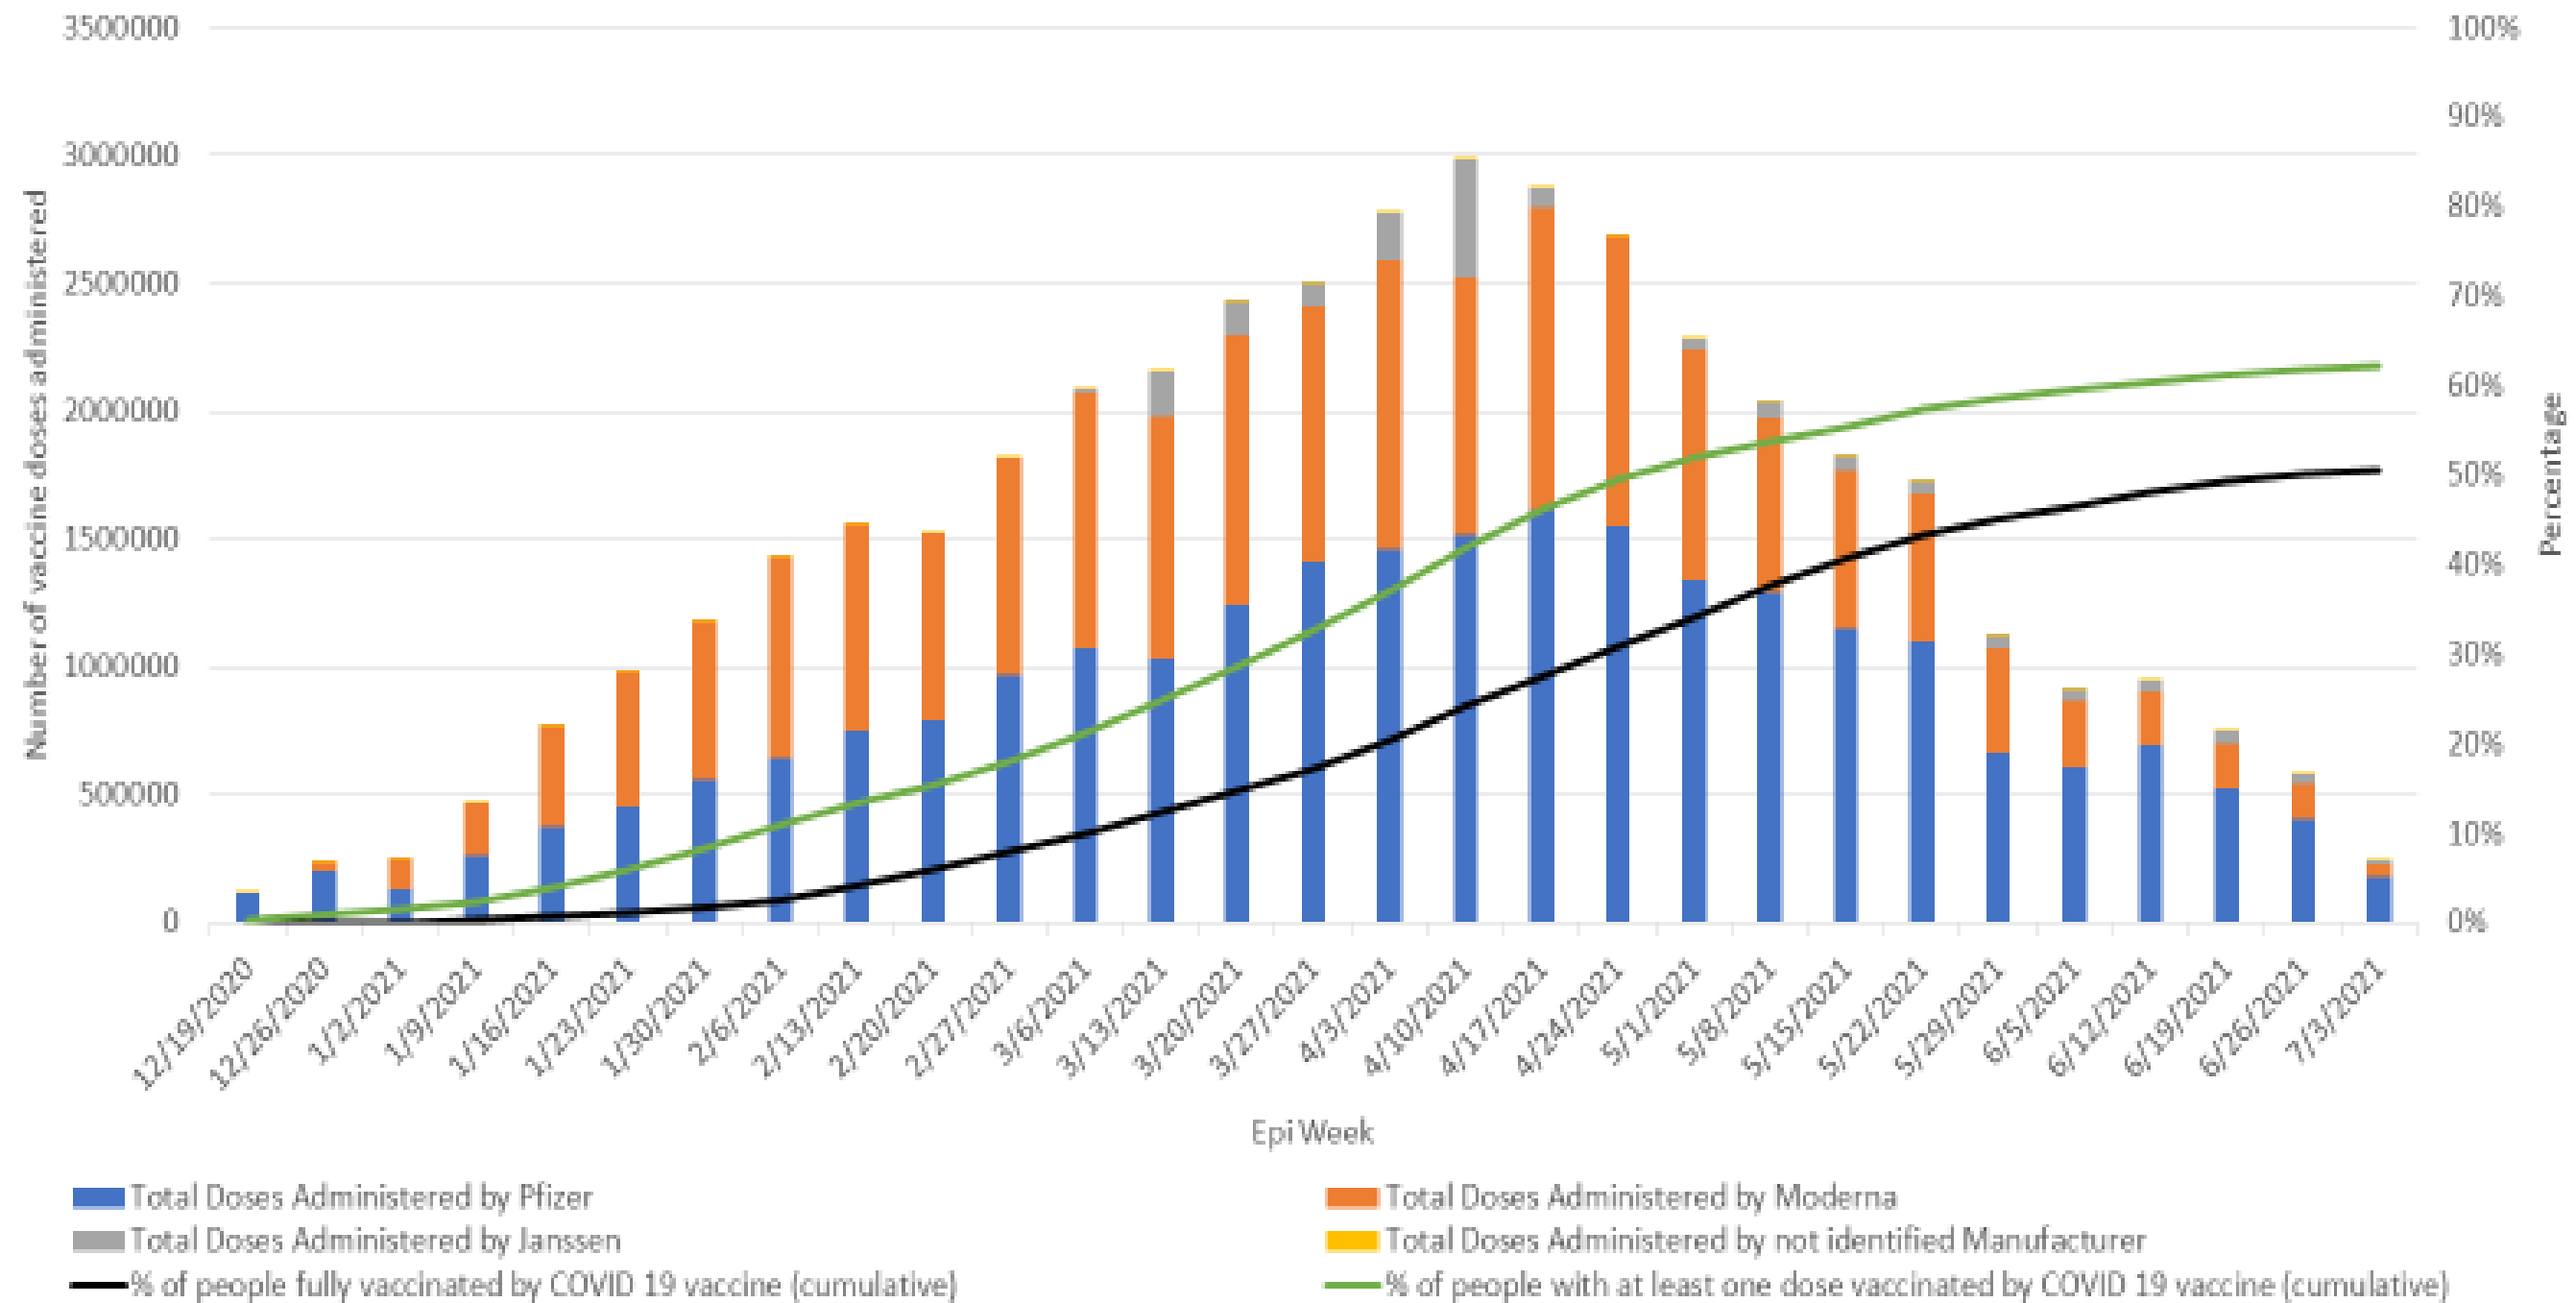

CDC, unpublished data, 2021. Data provided from the Routine Reporting and Data Visualization Team, Data Monitoring and Reporting Section, CDC Vaccine Task Force on July 2, 2021

Figure S17. Statewide Total Number of COVID-19 Vaccine Doses Administered and the Cumulative Percentage of People Fully and Partially Vaccinated by COVID-19 Vaccine, Oregon, December 19, 2020-July 2, 2021

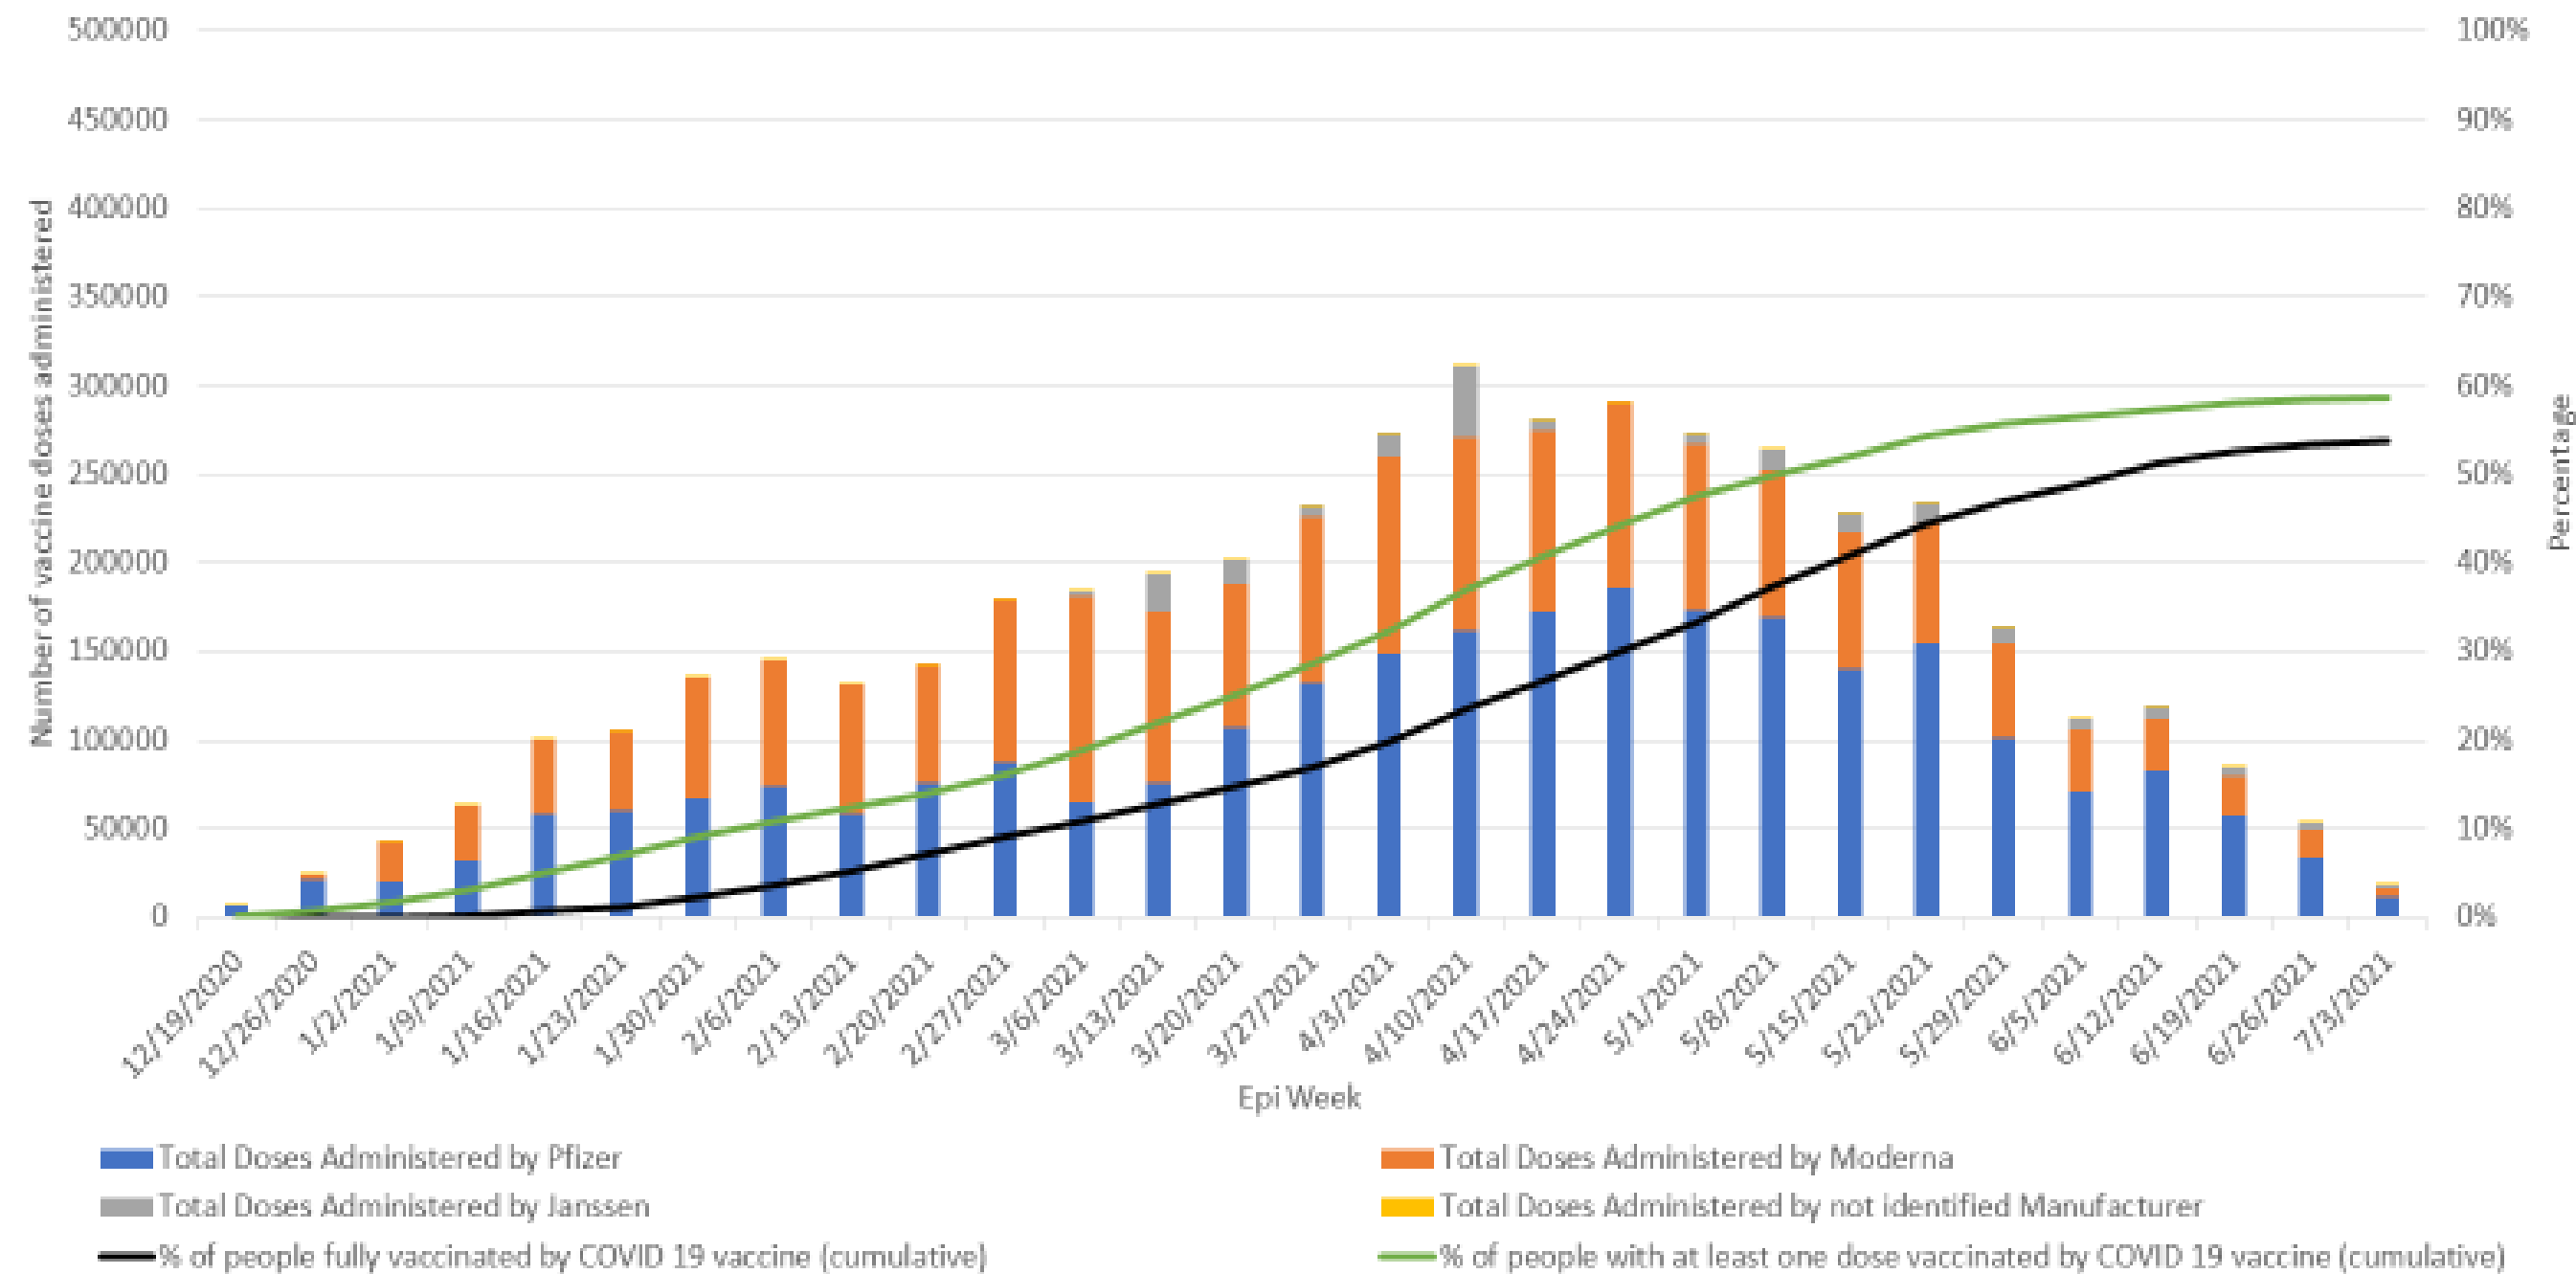

CDC, unpublished data, 2021. Data provided from the Routine Reporting and Data Visualization Team, Data Monitoring and Reporting Section, CDC Vaccine Task Force on July 2, 2021



Figure S18. Statewide Total Number of COVID-19 Vaccine Doses Administered and the Cumulative Percentage of People Fully and Partially Vaccinated by COVID-19 Vaccine, Indiana, December 19, 2020-July 2, 2021

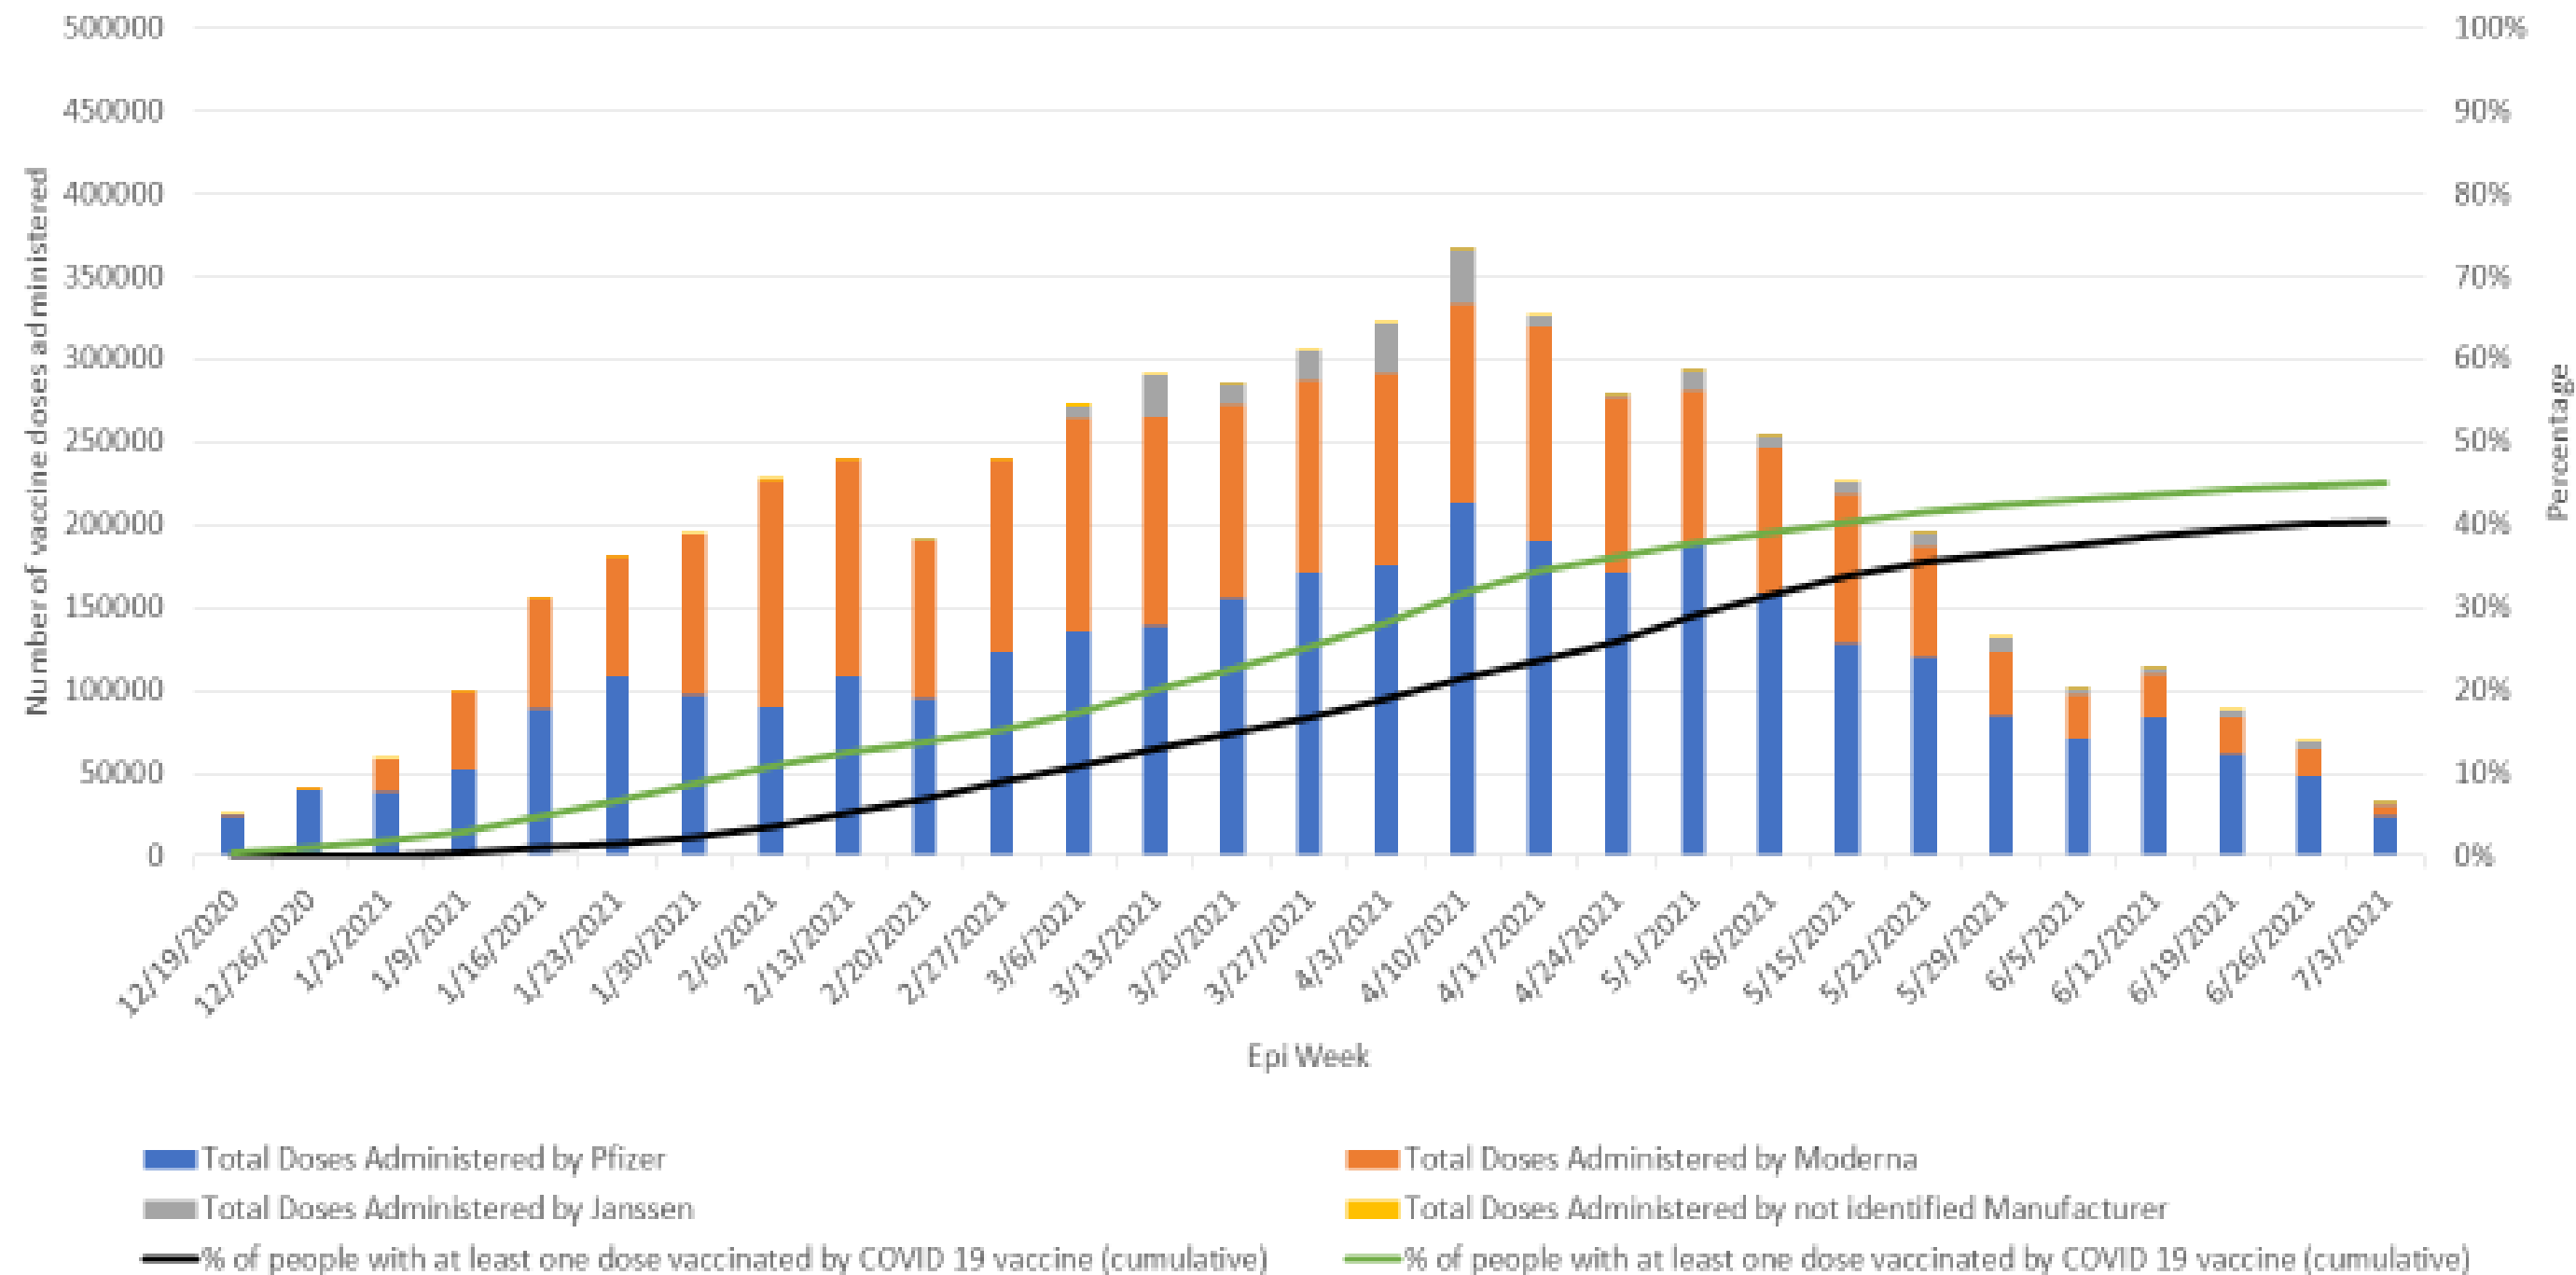

CDC, unpublished data, 2021. Data provided from the Routine Reporting and Data Visualization Team, Data Monitoring and Reporting Section, CDC Vaccine Task Force on July 2, 2021

Figure S19. Statewide Total Number of COVID-19 Vaccine Doses Administered and the Cumulative Percentage of People Fully and Partially Vaccinated by COVID-19 Vaccine, Colorado, December 19, 2020-July 2, 2021

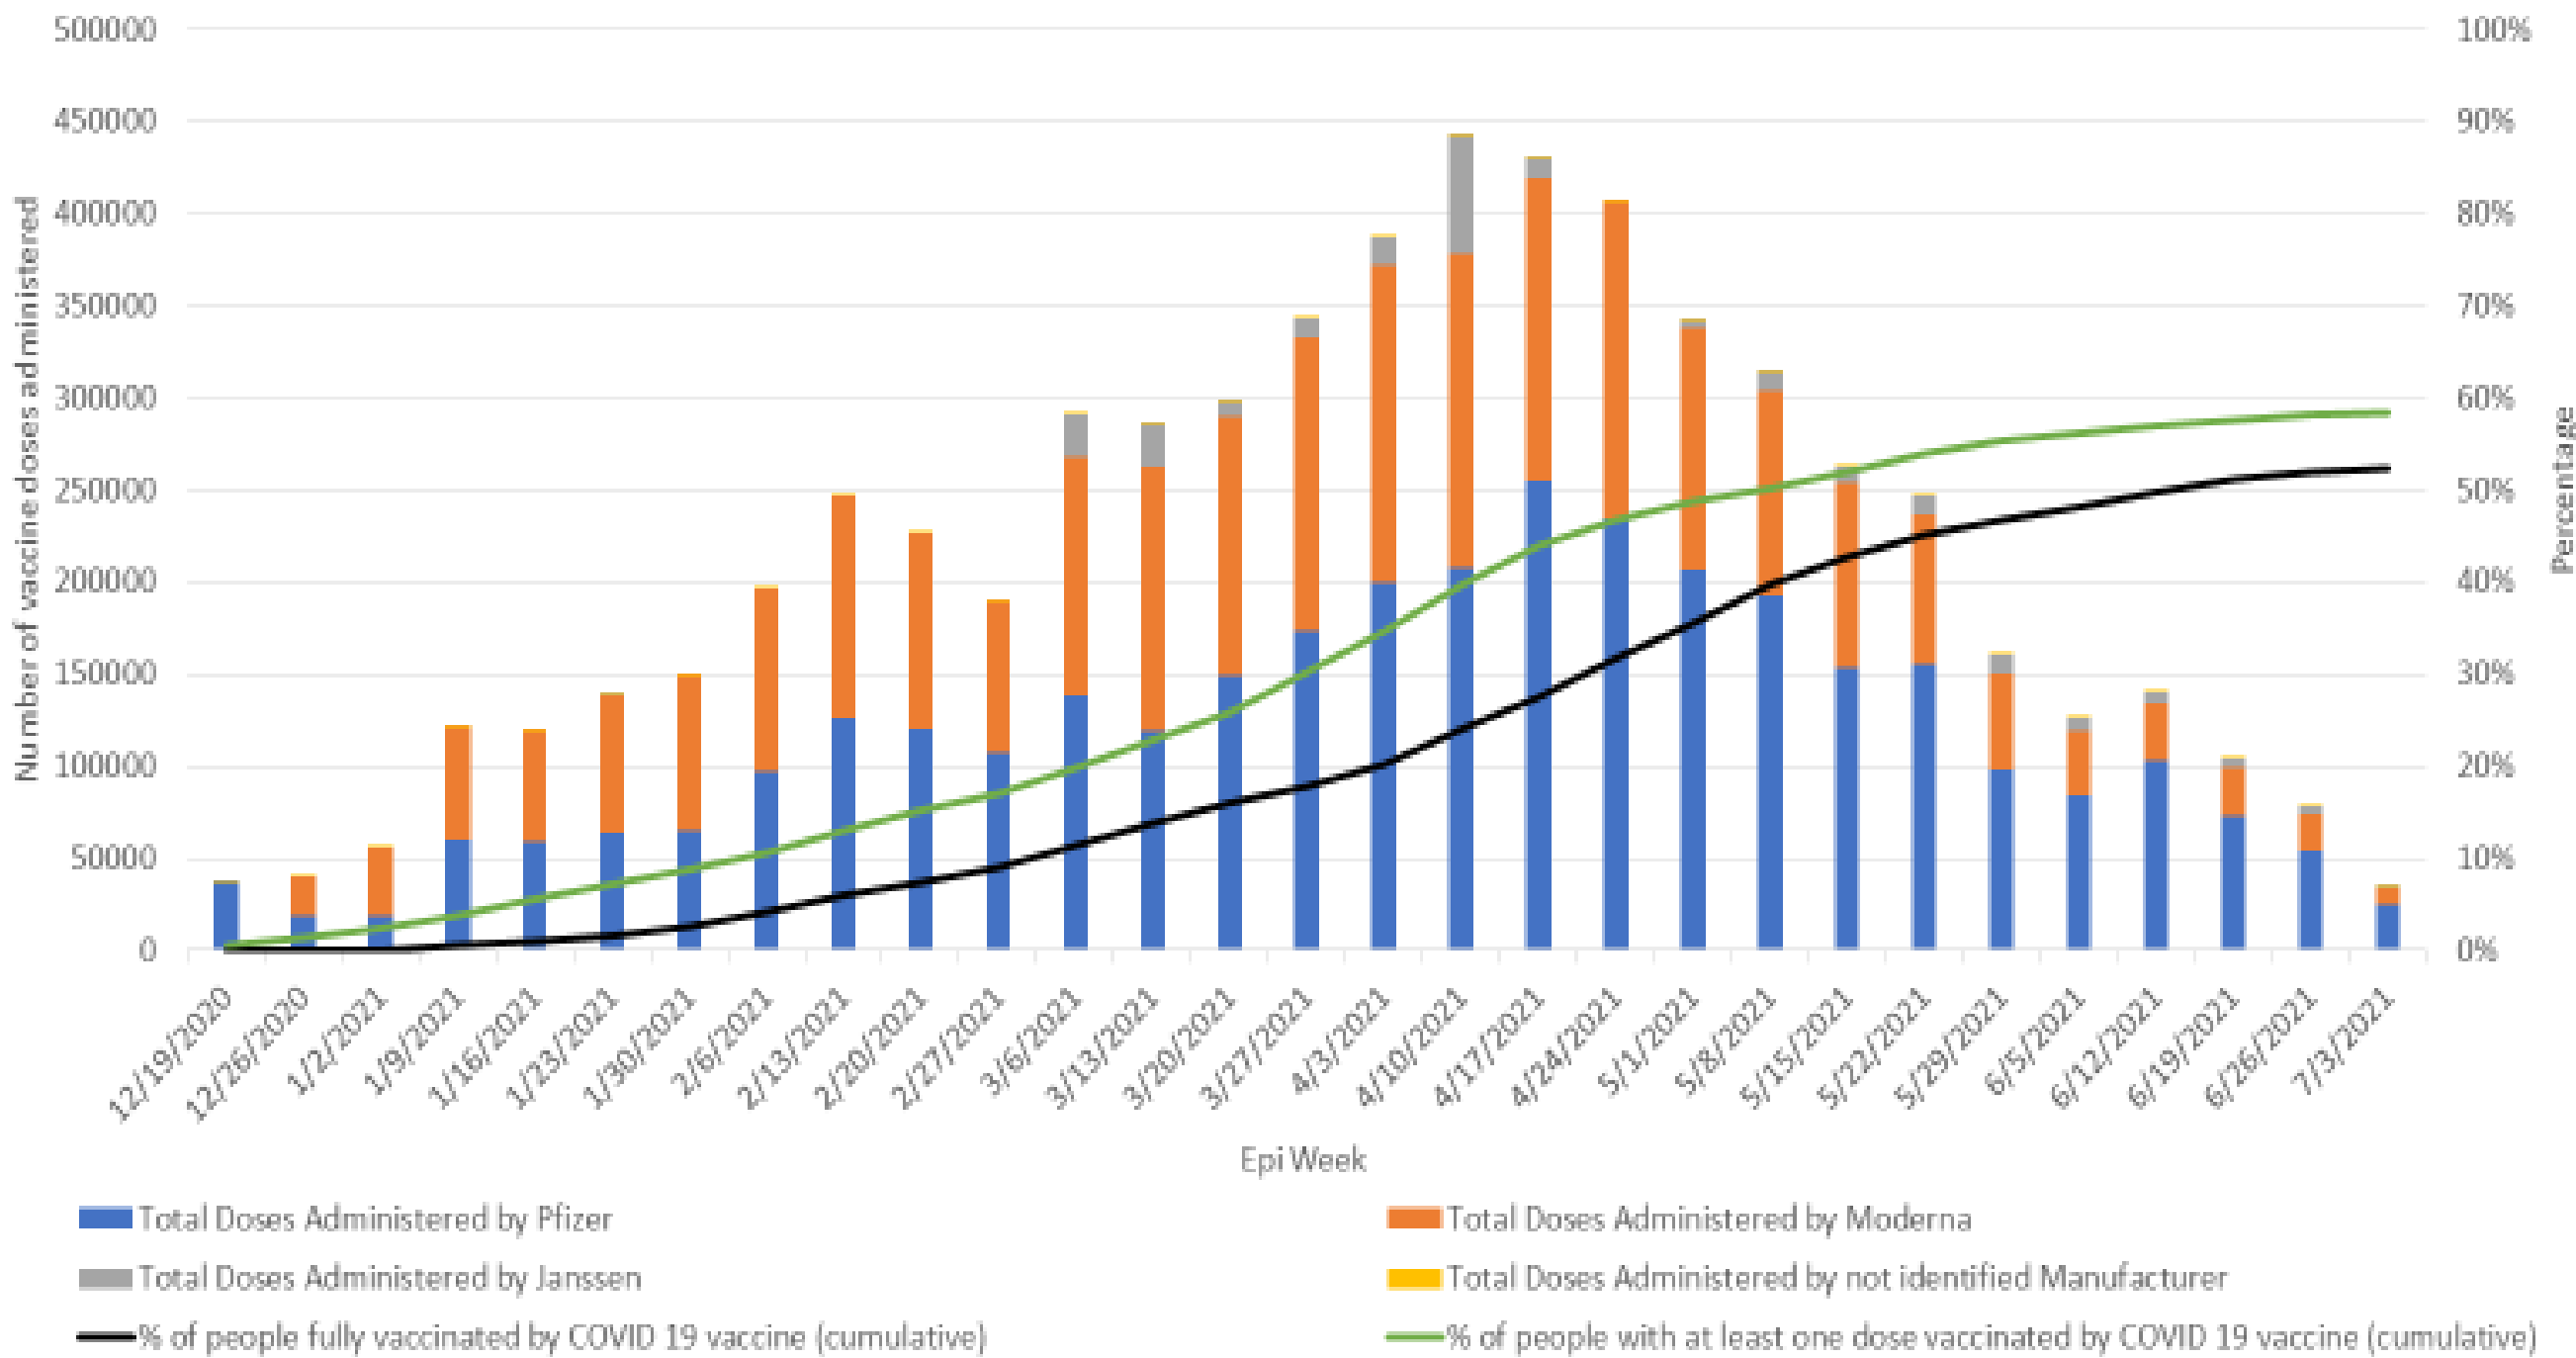

CDC, unpublished data, 2021. Data provided from the Routine Reporting and Data Visualization Team, Data Monitoring and Reporting Section, CDC Vaccine Task Force on July 2, 2021

## **D. Messenger RNA COVID-19 Vaccine Effectiveness among COVID-19-associated Hospitalizations**

### **1. Variables included in inverse propensity to be vaccinated weights for Hospital VE**

Variables unbalanced across COVID-19 infection status were considered potential confounders to include in the propensity-to-be-vaccinated weighting. Examining the association with COVID-19 infection status, the variables that had a standardized mean difference (SMD) of  $>0.1$ , and thus were included in the inverse-propensity-to-be-vaccinated weights, were site-region, age, race, ethnicity, type of admitting hospital, urban-rural classification of the facility, number of hospital beds, underlying conditions (including specific conditions), epidemiologic days, and 7-day moving average percent positivity (Table S22). Of these variables, site-region, type of admitting hospital, specific underlying conditions, and epidemiologic days were also unbalanced across vaccination status (SMD of  $>0.1$  in bivariate associations with vaccination before inclusion in the propensity to be vaccinated weights).

The distribution of weights from each of the VE models for hospitalization is presented in Table S23. Across all models, outliers were at the extreme upper ends of the distributions. Therefore, weights were truncated at the 99.9 percentile for each model. Table S23 lists the relatively small number of medical events in each model that received the truncated weight.

After propensity-to-be-vaccinated weighting, all variables were balanced across the vaccinated and unvaccinated groups (all with  $SMD \leq 0.02$ ; Table S24). VE estimates derived from data balanced by inverse-propensity-to-be-vaccinated weights were similar to VE estimates before adjustment, with absolute differences generally  $<10\%$ , with the exception of VE estimates

for the partial 1-dose vaccinations, which tended to have larger differences between VE estimates before and after adjustment (Table S16).

Table S22. Bivariate associations between covariates of interest and COVID-19 infection status for hospitalizations

|                                                       | Sample |            | SARS-CoV-2 Negatives |           | SARS-CoV-2 Positives |           | SMD <sup>1</sup> | Is variable included in Propensity Model <sup>2</sup> |
|-------------------------------------------------------|--------|------------|----------------------|-----------|----------------------|-----------|------------------|-------------------------------------------------------|
|                                                       | N      | ( Col. % ) | N                    | ( Row % ) | N                    | ( Row % ) |                  |                                                       |
| <b>A. Hospitalizations</b>                            |        |            |                      |           |                      |           |                  |                                                       |
| All hospitalizations                                  | 41552  | ( 100 )    | 37231                | ( 90 )    | 4321                 | ( 10 )    |                  |                                                       |
| Site Characteristics                                  |        |            |                      |           |                      |           |                  |                                                       |
| Site-region                                           |        |            |                      |           |                      |           | 0.629            | Yes                                                   |
| Columbia - site-region 1                              | 3126   | ( 8 )      | 2458                 | ( 79 )    | 668                  | ( 21 )    |                  |                                                       |
| HealthPartners - site-region 1                        | 973    | ( 2 )      | 916                  | ( 94 )    | 57                   | ( 6 )     |                  |                                                       |
| HealthPartners - site-region 2                        | 16     | ( 0 )      | 12                   | ( 75 )    | 4                    | ( 25 )    |                  |                                                       |
| Intermountain Healthcare - site-region 1              | 248    | ( 1 )      | 219                  | ( 88 )    | 29                   | ( 12 )    |                  |                                                       |
| Intermountain Healthcare - site-region 2              | 238    | ( 1 )      | 204                  | ( 86 )    | 34                   | ( 14 )    |                  |                                                       |
| Intermountain Healthcare - site-region 3              | 1434   | ( 3 )      | 1253                 | ( 87 )    | 181                  | ( 13 )    |                  |                                                       |
| Intermountain Healthcare - site-region 4              | 721    | ( 2 )      | 630                  | ( 87 )    | 91                   | ( 13 )    |                  |                                                       |
| Intermountain Healthcare - site-region 5              | 67     | ( 0 )      | 58                   | ( 87 )    | 9                    | ( 13 )    |                  |                                                       |
| Intermountain Healthcare - site-region 6              | 479    | ( 1 )      | 411                  | ( 86 )    | 68                   | ( 14 )    |                  |                                                       |
| Intermountain Healthcare - site-region 7              | 74     | ( 0 )      | 61                   | ( 82 )    | 13                   | ( 18 )    |                  |                                                       |
| Intermountain Healthcare - site-region 8              | 649    | ( 2 )      | 517                  | ( 80 )    | 132                  | ( 20 )    |                  |                                                       |
| Kaiser Permanente Northern California - site-region 1 | 705    | ( 2 )      | 651                  | ( 92 )    | 54                   | ( 8 )     |                  |                                                       |
| Kaiser Permanente Northern California - site-region 2 | 510    | ( 1 )      | 453                  | ( 89 )    | 57                   | ( 11 )    |                  |                                                       |
| Kaiser Permanente Northern California - site-region 3 | 3200   | ( 8 )      | 2981                 | ( 93 )    | 219                  | ( 7 )     |                  |                                                       |
| Kaiser Permanente Northern California - site-region 4 | 5660   | ( 14 )     | 5478                 | ( 97 )    | 182                  | ( 3 )     |                  |                                                       |
| Kaiser Permanente Northern California - site-region 5 | 1660   | ( 4 )      | 1605                 | ( 97 )    | 55                   | ( 3 )     |                  |                                                       |
| Kaiser Permanente Northern California - site-region 6 | 676    | ( 2 )      | 663                  | ( 98 )    | 13                   | ( 2 )     |                  |                                                       |
| Kaiser Permanente Northern California - site-region 7 | 267    | ( 1 )      | 243                  | ( 91 )    | 24                   | ( 9 )     |                  |                                                       |
| Kaiser Permanente Northern California - site-region 8 | 1146   | ( 3 )      | 1085                 | ( 95 )    | 61                   | ( 5 )     |                  |                                                       |
| Kaiser Permanente Northwest - site-region 1           | 1376   | ( 3 )      | 1301                 | ( 95 )    | 75                   | ( 5 )     |                  |                                                       |
| Kaiser Permanente Northwest - site-region 2           | 394    | ( 1 )      | 362                  | ( 92 )    | 32                   | ( 8 )     |                  |                                                       |
| Kaiser Permanente Northwest - site-region 3           | 182    | ( 0 )      | 171                  | ( 94 )    | 11                   | ( 6 )     |                  |                                                       |
| Regenstrief Institute - site-region 1                 | 2797   | ( 7 )      | 2386                 | ( 85 )    | 411                  | ( 15 )    |                  |                                                       |
| Regenstrief Institute - site-region 2                 | 565    | ( 1 )      | 458                  | ( 81 )    | 107                  | ( 19 )    |                  |                                                       |
| Regenstrief Institute - site-region 3                 | 170    | ( 0 )      | 122                  | ( 72 )    | 48                   | ( 28 )    |                  |                                                       |
| Regenstrief Institute - site-region 4                 | 934    | ( 2 )      | 779                  | ( 83 )    | 155                  | ( 17 )    |                  |                                                       |
| Regenstrief Institute - site-region 5                 | 3754   | ( 9 )      | 3334                 | ( 89 )    | 420                  | ( 11 )    |                  |                                                       |
| Regenstrief Institute - site-region 6                 | 1151   | ( 3 )      | 991                  | ( 86 )    | 160                  | ( 14 )    |                  |                                                       |

|                                             |       |   |    |   |       |   |      |   |      |   |      |   |      |      |     |
|---------------------------------------------|-------|---|----|---|-------|---|------|---|------|---|------|---|------|------|-----|
| Regenstrief Institute - site-region 7       | 114   | ( | 0  | ) | 108   | ( | 95   | ) | 6    | ( | 5    | ) |      |      |     |
| Regenstrief Institute - site-region 8       | 856   | ( | 2  | ) | 735   | ( | 86   | ) | 121  | ( | 14   | ) |      |      |     |
| Regenstrief Institute - site-region 9       | 778   | ( | 2  | ) | 711   | ( | 91   | ) | 67   | ( | 9    | ) |      |      |     |
| Regenstrief Institute - site-region 10      | 271   | ( | 1  | ) | 256   | ( | 94   | ) | 15   | ( | 6    | ) |      |      |     |
| Regenstrief Institute - site-region missing | 1047  | ( | 3  | ) | 896   | ( | 86   | ) | 151  | ( | 14   | ) |      |      |     |
| University of Colorado - site-region 1      | 1585  | ( | 4  | ) | 1413  | ( | 89   | ) | 172  | ( | 11   | ) |      |      |     |
| University of Colorado - site-region 2      | 1927  | ( | 5  | ) | 1719  | ( | 89   | ) | 208  | ( | 11   | ) |      |      |     |
| University of Colorado - site-region 3      | 1802  | ( | 4  | ) | 1591  | ( | 88   | ) | 211  | ( | 12   | ) |      |      |     |
| <b>Patient Characteristics</b>              |       |   |    |   |       |   |      |   |      |   |      |   |      |      |     |
| Sex                                         |       |   |    |   |       |   |      |   |      |   |      |   | 0.07 | No   |     |
| Male                                        | 19582 | ( | 47 | ) | 17418 | ( | 89   | ) | 2164 | ( | 11   | ) |      |      |     |
| Female                                      | 21969 | ( | 53 | ) | 19812 | ( | 90   | ) | 2157 | ( | 10   | ) |      |      |     |
| Race                                        |       |   |    |   |       |   |      |   |      |   |      |   | 0.29 | Yes  |     |
| White                                       | 29019 | ( | 70 | ) | 26357 | ( | 91   | ) | 2662 | ( | 9    | ) |      |      |     |
| Black                                       | 3902  | ( | 9  | ) | 3414  | ( | 87   | ) | 488  | ( | 13   | ) |      |      |     |
| Other <sup>3</sup>                          | 2892  | ( | 7  | ) | 2692  | ( | 93   | ) | 200  | ( | 7    | ) |      |      |     |
| Unknown                                     | 5739  | ( | 14 | ) | 4768  | ( | 83   | ) | 971  | ( | 17   | ) |      |      |     |
| Ethnicity                                   |       |   |    |   |       |   |      |   |      |   |      |   | 0.23 | Yes  |     |
| Hispanic/Latinx Ethnicity                   | 4574  | ( | 11 | ) | 3825  | ( | 84   | ) | 749  | ( | 16   | ) |      |      |     |
| Not Hispanic/Latinx Ethnicity               | 31069 | ( | 75 | ) | 28190 | ( | 91   | ) | 2879 | ( | 9    | ) |      |      |     |
| Unknown                                     | 5909  | ( | 14 | ) | 5216  | ( | 88   | ) | 693  | ( | 12   | ) |      |      |     |
| Age, continuous (mean, std)                 | 73.6  | ( | 11 | ) | 73.9  | ( | 10.8 | ) | 71   | ( | 11.5 | ) |      | 0.26 | Yes |
| <b>Setting Characteristics</b>              |       |   |    |   |       |   |      |   |      |   |      |   |      |      |     |
| Admitting Hospital                          |       |   |    |   |       |   |      |   |      |   |      |   | 0.25 | Yes  |     |
| Community                                   | 10633 | ( | 26 | ) | 9117  | ( | 86   | ) | 1516 | ( | 14   | ) |      |      |     |
| Tertiary                                    | 29862 | ( | 72 | ) | 27208 | ( | 91   | ) | 2654 | ( | 9    | ) |      |      |     |
| Unknown                                     | 1057  | ( | 3  | ) | 906   | ( | 86   | ) | 151  | ( | 14   | ) |      |      |     |
| Urban-Rural Classification of Facility      |       |   |    |   |       |   |      |   |      |   |      |   | 0.2  | Yes  |     |
| Large Central Metro/Large Fringe Metro      | 26764 | ( | 64 | ) | 24228 | ( | 91   | ) | 2536 | ( | 9    | ) |      |      |     |
| Medium Metro/Small Metro                    | 12959 | ( | 31 | ) | 11508 | ( | 89   | ) | 1441 | ( | 11   | ) |      |      |     |
| Micropolitan/Non-Core                       | 733   | ( | 2  | ) | 544   | ( | 74   | ) | 189  | ( | 26   | ) |      |      |     |
| Unknown                                     | 1106  | ( | 3  | ) | 951   | ( | 86   | ) | 155  | ( | 14   | ) |      |      |     |

|                                                                   |       |        |       |        |      |        |          |
|-------------------------------------------------------------------|-------|--------|-------|--------|------|--------|----------|
| Hospital Beds                                                     |       |        |       |        |      | 0.14   | No       |
| 0-49 beds                                                         | 1238  | ( 3 )  | 1038  | ( 84 ) | 200  | ( 16 ) |          |
| 50-99 beds                                                        | 2595  | ( 6 )  | 2328  | ( 90 ) | 267  | ( 10 ) |          |
| 100-249 beds                                                      | 14629 | ( 35 ) | 13268 | ( 91 ) | 1361 | ( 9 )  |          |
| 250+ beds                                                         | 22033 | ( 53 ) | 19691 | ( 89 ) | 2342 | ( 11 ) |          |
| Unknown                                                           | 1057  | ( 3 )  | 906   | ( 86 ) | 151  | ( 14 ) |          |
| Hospital Ownership                                                |       |        |       |        |      | 0.05   | No       |
| Non-Profit                                                        | 39859 | ( 96 ) | 35751 | ( 90 ) | 4108 | ( 10 ) |          |
| For Profit / Other                                                | 1693  | ( 4 )  | 1480  | ( 87 ) | 213  | ( 13 ) |          |
| Underlying medical conditions (more than one may apply)           |       |        |       |        |      |        |          |
| Chronic respiratory condition                                     | 27423 | ( 66 ) | 24689 | ( 90 ) | 2734 | ( 10 ) | 0.07 No  |
| Chronic non-respiratory condition                                 | 37899 | ( 91 ) | 34289 | ( 90 ) | 3610 | ( 10 ) | 0.26 Yes |
| Asthma                                                            | 6277  | ( 15 ) | 5907  | ( 94 ) | 370  | ( 6 )  | 0.22 Yes |
| COPD                                                              | 12645 | ( 30 ) | 12035 | ( 95 ) | 610  | ( 5 )  | 0.44 Yes |
| Other Chronic Lung Disease                                        | 17624 | ( 42 ) | 15196 | ( 86 ) | 2428 | ( 14 ) | 0.31 Yes |
| Heart Failure                                                     | 12862 | ( 31 ) | 12126 | ( 94 ) | 736  | ( 6 )  | 0.37 Yes |
| Ischemic Heart Disease                                            | 13134 | ( 32 ) | 12142 | ( 92 ) | 992  | ( 8 )  | 0.22 Yes |
| Hypertension                                                      | 27382 | ( 66 ) | 24908 | ( 91 ) | 2474 | ( 9 )  | 0.2 Yes  |
| Other Heart Disease                                               | 22266 | ( 54 ) | 20595 | ( 92 ) | 1671 | ( 8 )  | 0.34 Yes |
| Stroke                                                            | 1850  | ( 4 )  | 1700  | ( 92 ) | 150  | ( 8 )  | 0.06 No  |
| Other Cerebrovascular Disease                                     | 1978  | ( 5 )  | 1836  | ( 93 ) | 142  | ( 7 )  | 0.08 No  |
| Diabetes Type 1                                                   | 244   | ( 1 )  | 225   | ( 92 ) | 19   | ( 8 )  | 0.02 No  |
| Diabetes Type 2                                                   | 14106 | ( 34 ) | 12603 | ( 89 ) | 1503 | ( 11 ) | 0.02 No  |
| Diabetes due to underlying conditions or other specified diabetes | 211   | ( 1 )  | 164   | ( 78 ) | 47   | ( 22 ) | 0.07 No  |
| Other Metabolic Disease (excluding diabetes)                      | 26286 | ( 63 ) | 24006 | ( 91 ) | 2280 | ( 9 )  | 0.24 Yes |
| Clinical Obesity                                                  | 9422  | ( 23 ) | 8385  | ( 89 ) | 1037 | ( 11 ) | 0.04 No  |
| Clinical Underweight                                              | 4601  | ( 11 ) | 4118  | ( 90 ) | 483  | ( 10 ) | 0.004 No |
| Renal Disease                                                     | 13666 | ( 33 ) | 12614 | ( 92 ) | 1052 | ( 8 )  | 0.21 Yes |
| Liver Disease                                                     | 4025  | ( 10 ) | 3714  | ( 92 ) | 311  | ( 8 )  | 0.1 No   |
| Blood Disorder                                                    | 3226  | ( 8 )  | 2928  | ( 91 ) | 298  | ( 9 )  | 0.04 No  |
| Immunosuppression                                                 | 15726 | ( 38 ) | 14468 | ( 92 ) | 1258 | ( 8 )  | 0.21 Yes |
| Organ Transplant                                                  | 612   | ( 1 )  | 553   | ( 90 ) | 59   | ( 10 ) | 0.01 No  |
| Cancer                                                            | 5997  | ( 14 ) | 5686  | ( 95 ) | 311  | ( 5 )  | 0.26 Yes |
| Dementia                                                          | 4397  | ( 11 ) | 3963  | ( 90 ) | 434  | ( 10 ) | 0.02 No  |
| Other Neurological/Musculoskeletal Disorder                       | 13787 | ( 33 ) | 12737 | ( 92 ) | 1050 | ( 8 )  | 0.22 Yes |

|                                                |      |               |      |               |      |               |       |     |
|------------------------------------------------|------|---------------|------|---------------|------|---------------|-------|-----|
| Down Syndrome                                  | 13   | ( 0 )         | 13   | ( 100 )       | 0    | ( 0 )         | 0.03  | No  |
| Time Considerations (Median, Q1-Q3)            |      |               |      |               |      |               |       |     |
| Epi-curve (days)                               | 4/17 | ( 3/23-5/12 ) | 4/18 | ( 3/24-5/12 ) | 4/12 | ( 3/15-5/10 ) | 0.182 | Yes |
| 7-day Moving Average Percent Positivity (days) | 4.2  | ( 2.1-5.9 )   | 4    | ( 2.0-5.7 )   | 5.5  | ( 4.0-7.3 )   | 0.55  | Yes |

<sup>1</sup>Illustrates SMD prior to propensity weighting, to show differences between SARS-CoV-2 negative and positive groups.

<sup>2</sup>Variables with a SMD > 0.1 were included in PS weighting.

<sup>3</sup>Other race include Asian, Hawaiian or Other Pacific islander, American Indian or Alaskan Native, Other not-listed and multi-race.



**Table S23. Quantiles of Weights used for VE Estimates among COVID-19-associated hospitalizations and intensive care unit (ICU) admissions events**

|                                                                                                                                     | <b>50%</b> | <b>Min</b> | <b>Max</b> | <b>1%</b> | <b>25%</b> | <b>75%</b> | <b>99%</b> | <b>100%</b> | <b>Number Truncated</b> |
|-------------------------------------------------------------------------------------------------------------------------------------|------------|------------|------------|-----------|------------|------------|------------|-------------|-------------------------|
| <u>mRNA VE among COVID-19 ED/UC medical events</u>                                                                                  |            |            |            |           |            |            |            |             |                         |
| VE both mRNA vaccines (aged $\geq 50$ years)                                                                                        | 1.53       | 1.01       | 43.83      | 1.06      | 1.27       | 2.16       | 6.59       | 11.02       | 41                      |
| <u>By vaccine product among COVID-19 medical events</u>                                                                             |            |            |            |           |            |            |            |             |                         |
| VE of BioNTech-Pfizer mRNA (aged $\geq 50$ years)                                                                                   | 1.05       | 1.00       | 146.78     | 1.01      | 1.03       | 1.11       | 19.73      | 43.08       | 12                      |
| VE of Moderna mRNA (aged $\geq 50$ years)                                                                                           | 1.46       | 1.01       | 30.37      | 1.03      | 1.19       | 2.00       | 7.67       | 15.22       | 30                      |
| Ad26.COV2.S (Johnson & Johnson)                                                                                                     | 1.05       | 1.00       | 146.78     | 1.01      | 1.03       | 1.11       | 19.73      | 43.08       | 12                      |
| <u>By Age Group among COVID-19 medical events</u>                                                                                   |            |            |            |           |            |            |            |             |                         |
| VE both mRNA vaccines (aged 50-64 years)                                                                                            | 1.53       | 1.04       | 12.94      | 1.08      | 1.28       | 2.11       | 6.15       | 9.37        | 9                       |
| VE both mRNA vaccines (aged 65-74 years)                                                                                            | 1.57       | 1.01       | 34.46      | 1.03      | 1.29       | 2.13       | 6.03       | 10.53       | 13                      |
| VE both mRNA vaccines (aged 75-84 years)                                                                                            | 1.50       | 1.01       | 15.98      | 1.06      | 1.24       | 2.09       | 7.15       | 11.74       | 13                      |
| VE both mRNA vaccines (aged $\geq 85$ years)                                                                                        | 1.45       | 1.01       | 14.55      | 1.06      | 1.24       | 2.07       | 6.67       | 10.07       | 8                       |
| <u>By Race and Ethnicity among COVID-19 medical events</u>                                                                          |            |            |            |           |            |            |            |             |                         |
| VE both mRNA vaccines among White adults aged $\geq 50$ years                                                                       | 1.56       | 1.02       | 19.69      | 1.07      | 1.28       | 2.14       | 6.63       | 11.21       | 29                      |
| VE both mRNA vaccines among Black adults aged $\geq 50$ years                                                                       | 1.47       | 1.03       | 15.40      | 1.05      | 1.26       | 2.01       | 5.83       | 11.03       | 4                       |
| VE both mRNA vaccines among Other or Unknown aged $\geq 50$ years                                                                   | 1.30       | 1.01       | 12.00      | 1.04      | 1.18       | 1.76       | 8.24       | 11.04       | 3                       |
| VE both mRNA vaccines among Hispanic adults aged $\geq 50$ years                                                                    | 1.47       | 1.01       | 12.45      | 1.07      | 1.26       | 2.06       | 5.90       | 7.98        | 5                       |
| VE both mRNA vaccines among Non-Hispanic adults aged $\geq 50$ years                                                                | 1.51       | 1.02       | 23.05      | 1.06      | 1.25       | 2.14       | 6.71       | 10.72       | 31                      |
| <u>By Presence of Absence of Underlying Chronic Medical Conditions Associated with Increased Risk of Severe Respiratory Disease</u> |            |            |            |           |            |            |            |             |                         |
| VE both mRNA vaccines among aged $\geq 50$ years with no chronic condition                                                          | 1.60       | 1.02       | 12.67      | 1.04      | 1.32       | 2.13       | 5.11       | 9.69        | 3                       |
| VE both mRNA vaccines among aged $\geq 50$ years with $\geq 1$ chronic respiratory condition                                        | 1.50       | 1.01       | 40.26      | 1.05      | 1.25       | 2.11       | 6.90       | 11.25       | 27                      |
| VE both mRNA vaccines among aged $\geq 50$ years with $\geq 1$ chronic non-respiratory condition                                    | 1.52       | 1.01       | 44.36      | 1.06      | 1.27       | 2.14       | 6.75       | 11.17       | 38                      |
| <u>By Alternative Clinical Outcomes</u>                                                                                             |            |            |            |           |            |            |            |             |                         |

|                                                                                                        |      |      |       |      |      |      |      |       |    |
|--------------------------------------------------------------------------------------------------------|------|------|-------|------|------|------|------|-------|----|
| VE both mRNA vaccines among aged $\geq 50$ years with acute respiratory illness diagnosis              | 1.51 | 1.01 | 36.77 | 1.05 | 1.26 | 2.13 | 6.82 | 11.31 | 30 |
| VE both mRNA vaccines among aged $\geq 50$ years with clinical pneumonia diagnosis                     | 1.54 | 1.00 | 24.53 | 1.05 | 1.28 | 2.14 | 5.91 | 9.53  | 10 |
| VE both mRNA vaccines among aged $\geq 50$ years with CLI/signs and symptoms as primary discharge code | 1.56 | 1.01 | 31.35 | 1.05 | 1.30 | 2.14 | 6.04 | 10.02 | 25 |
| ICU admission                                                                                          | 1.49 | 1.02 | 19.63 | 1.06 | 1.25 | 2.08 | 6.13 | 8.99  | 8  |

Table S24. Unweighted and weighted standardized mean differences (SMD) for variables included in PS model for mRNA-specific VE estimates - Hospitalizations events

|                                                       | Sample | Unvaccinated |           | Partially or Fully Vaccinated |           | Unweighted       | Weighted         |
|-------------------------------------------------------|--------|--------------|-----------|-------------------------------|-----------|------------------|------------------|
|                                                       | N      | N            | ( Row % ) | N                             | ( Row % ) | SMD <sup>2</sup> | SMD <sup>3</sup> |
| <b>A. Hospitalizations</b>                            |        |              |           |                               |           |                  |                  |
| All hospitalizations                                  | 36554  | 16711        | ( 46 )    | 19843                         | ( 54 )    | -                | -                |
| Site Characteristics                                  |        |              |           |                               |           |                  |                  |
| Site-region                                           |        |              |           |                               |           |                  |                  |
| Columbia - site-region 1                              | 2421   | 1586         | ( 66 )    | 835                           | ( 34 )    | -0.212           | -0.002           |
| HealthPartners - site-region 1                        | 908    | 337          | ( 37 )    | 571                           | ( 63 )    | 0.055            | 0.004            |
| HealthPartners - site-region 2                        | 12     | 5            | ( 42 )    | 7                             | ( 58 )    | 0.003            | 0.002            |
| Intermountain Healthcare - site-region 1              | 211    | 107          | ( 51 )    | 104                           | ( 49 )    | -0.015           | -0.005           |
| Intermountain Healthcare - site-region 2              | 200    | 71           | ( 36 )    | 129                           | ( 65 )    | 0.031            | 0.003            |
| Intermountain Healthcare - site-region 3              | 1227   | 508          | ( 41 )    | 719                           | ( 59 )    | 0.032            | 0.003            |
| Intermountain Healthcare - site-region 4              | 624    | 265          | ( 42 )    | 359                           | ( 58 )    | 0.017            | 0                |
| Intermountain Healthcare - site-region 5              | 57     | 26           | ( 46 )    | 31                            | ( 54 )    | 0                | 0.001            |
| Intermountain Healthcare - site-region 6              | 399    | 189          | ( 47 )    | 210                           | ( 53 )    | -0.007           | 0                |
| Intermountain Healthcare - site-region 7              | 60     | 26           | ( 43 )    | 34                            | ( 57 )    | 0.004            | 0                |
| Intermountain Healthcare - site-region 8              | 492    | 254          | ( 52 )    | 238                           | ( 48 )    | -0.028           | -0.009           |
| Kaiser Permanente Northern California - site-region 1 | 634    | 188          | ( 30 )    | 446                           | ( 70 )    | 0.086            | 0.002            |
| Kaiser Permanente Northern California - site-region 2 | 445    | 165          | ( 37 )    | 280                           | ( 63 )    | 0.039            | 0.002            |
| Kaiser Permanente Northern California - site-region 3 | 2921   | 823          | ( 28 )    | 2098                          | ( 72 )    | 0.208            | 0.006            |
| Kaiser Permanente Northern California - site-region 4 | 5296   | 1135         | ( 21 )    | 4161                          | ( 79 )    | 0.403            | 0.018            |
| Kaiser Permanente Northern California - site-region 5 | 1542   | 303          | ( 20 )    | 1239                          | ( 80 )    | 0.22             | 0.016            |
| Kaiser Permanente Northern California - site-region 6 | 642    | 115          | ( 18 )    | 527                           | ( 82 )    | 0.15             | 0.012            |
| Kaiser Permanente Northern California - site-region 7 | 239    | 75           | ( 31 )    | 164                           | ( 69 )    | 0.047            | 0.002            |
| Kaiser Permanente Northern California - site-region 8 | 1060   | 267          | ( 25 )    | 793                           | ( 75 )    | 0.143            | 0.008            |
| Kaiser Permanente Northwest - site-region 1           | 2356   | 1596         | ( 68 )    | 760                           | ( 32 )    | -0.233           | -0.012           |
| Kaiser Permanente Northwest - site-region 2           | 452    | 230          | ( 51 )    | 222                           | ( 49 )    | -0.023           | -0.001           |
| Kaiser Permanente Northwest - site-region 3           | 122    | 73           | ( 60 )    | 49                            | ( 40 )    | -0.033           | -0.005           |
| Regenstrief Institute - site-region 1                 | 771    | 438          | ( 57 )    | 333                           | ( 43 )    | -0.066           | -0.008           |
| Regenstrief Institute - site-region 2                 | 3294   | 1815         | ( 55 )    | 1479                          | ( 45 )    | -0.119           | -0.008           |
| Regenstrief Institute - site-region 3                 | 984    | 548          | ( 56 )    | 436                           | ( 44 )    | -0.067           | -0.004           |
| Regenstrief Institute - site-region 4                 | 106    | 58           | ( 55 )    | 48                            | ( 45 )    | -0.02            | -0.003           |
| Regenstrief Institute - site-region 5                 | 733    | 411          | ( 56 )    | 322                           | ( 44 )    | -0.06            | -0.006           |
| Regenstrief Institute - site-region 6                 | 698    | 320          | ( 46 )    | 378                           | ( 54 )    | -0.001           | 0.001            |

|                                               |       |       |        |       |        |        |        |
|-----------------------------------------------|-------|-------|--------|-------|--------|--------|--------|
| Regenstrief Institute - site-region 7         | 254   | 129   | ( 51 ) | 125   | ( 49 ) | -0.017 | 0      |
| Regenstrief Institute - site-region 8         | 888   | 538   | ( 61 ) | 350   | ( 39 ) | -0.095 | -0.004 |
| Regenstrief Institute - site-region 9         | 1413  | 996   | ( 70 ) | 417   | ( 30 ) | -0.2   | -0.01  |
| Regenstrief Institute - site-region 10        | 1719  | 1043  | ( 61 ) | 676   | ( 39 ) | -0.134 | -0.006 |
| Regenstrief Institute - site-region missing   | 1591  | 1263  | ( 79 ) | 328   | ( 21 ) | -0.289 | -0.014 |
| University of Colorado - site-region 1        | 1256  | 560   | ( 45 ) | 696   | ( 55 ) | 0.009  | 0.001  |
| University of Colorado - site-region 2        | 357   | 179   | ( 50 ) | 178   | ( 50 ) | -0.018 | 0.001  |
| University of Colorado - site-region 3        | 170   | 69    | ( 41 ) | 101   | ( 59 ) | 0.014  | 0.002  |
| <b>Patient Characteristics</b>                |       |       |        |       |        |        |        |
| <b>Sex</b>                                    |       |       |        |       |        |        |        |
| Female                                        | 19444 | 8866  | ( 46 ) | 10578 | ( 54 ) | -      | -      |
| Male                                          | 17110 | 7845  | ( 46 ) | 9265  | ( 54 ) | -      | -      |
| <b>Race</b>                                   |       |       |        |       |        |        |        |
| White                                         | 25923 | 11631 | ( 45 ) | 14292 | ( 55 ) | 0.053  | 0.007  |
| Black                                         | 3333  | 1957  | ( 59 ) | 1376  | ( 41 ) | -0.166 | -0.012 |
| Other <sup>4</sup>                            | 2616  | 755   | ( 29 ) | 1861  | ( 71 ) | 0.189  | 0.011  |
| Unknown                                       | 4682  | 2368  | ( 51 ) | 2314  | ( 49 ) | -0.075 | -0.008 |
| <b>Ethnicity</b>                              |       |       |        |       |        |        |        |
| Hispanic/Latinx Ethnicity                     | 27749 | 12901 | ( 46 ) | 14848 | ( 54 ) | -0.055 | -0.008 |
| Not Hispanic/Latinx Ethnicity                 | 3744  | 1720  | ( 46 ) | 2024  | ( 54 ) | -0.003 | 0.006  |
| Unknown                                       | 5061  | 2090  | ( 41 ) | 2971  | ( 59 ) | 0.071  | 0.005  |
| Age, continuous (mean, std)                   | 73.99 | 72.05 | ( 11 ) | 75.62 | ( 10 ) | 0.33   | 0.02   |
| <b>Setting Characteristics</b>                |       |       |        |       |        |        |        |
| <b>Admitting Hospital</b>                     |       |       |        |       |        |        |        |
| Community                                     | 8933  | 4606  | ( 52 ) | 4327  | ( 48 ) | -0.134 | -0.014 |
| Tertiary                                      | 26723 | 11559 | ( 43 ) | 15164 | ( 57 ) | 0.164  | 0.015  |
| Unknown                                       | 898   | 546   | ( 61 ) | 352   | ( 39 ) | -0.096 | -0.006 |
| <b>Urban-Rural Classification of Facility</b> |       |       |        |       |        |        |        |
| Large Central Metro/Large Fringe Metro        | 23723 | 10219 | ( 43 ) | 13504 | ( 57 ) | 0.145  | 0.005  |
| Medium Metro/Small Metro                      | 11354 | 5647  | ( 50 ) | 5707  | ( 50 ) | -0.109 | -0.002 |
| Micropolitan/Non-Core                         | 536   | 282   | ( 53 ) | 254   | ( 47 ) | -0.034 | -0.007 |
| Unknown                                       | 941   | 563   | ( 60 ) | 378   | ( 40 ) | -0.092 | -0.003 |

|                                                                   |       |       |   |    |   |       |   |    |   |        |        |
|-------------------------------------------------------------------|-------|-------|---|----|---|-------|---|----|---|--------|--------|
| Hospital Beds                                                     |       |       |   |    |   |       |   |    |   |        |        |
| 0-49 beds                                                         | 1015  | 449   | ( | 44 | ) | 566   | ( | 56 | ) | 0.01   | -0.01  |
| 50-99 beds                                                        | 2287  | 902   | ( | 39 | ) | 1385  | ( | 61 | ) | 0.065  | -0.002 |
| 100-249 beds                                                      | 12932 | 4816  | ( | 37 | ) | 8116  | ( | 63 | ) | 0.253  | 0.008  |
| 250+ beds                                                         | 19422 | 9998  | ( | 51 | ) | 9424  | ( | 49 | ) | -0.247 | -0.001 |
| Unknown                                                           | 898   | 546   | ( | 61 | ) | 352   | ( | 39 | ) | -0.096 | -0.006 |
| Hospital Ownership                                                |       |       |   |    |   |       |   |    |   |        |        |
| Non-Profit                                                        | 35089 | 15869 | ( | 45 | ) | 19220 | ( | 55 | ) | -      | -      |
| For Profit / Other                                                | 1465  | 842   | ( | 57 | ) | 623   | ( | 43 | ) | -      | -      |
| Underlying medical conditions (more than one may apply)           |       |       |   |    |   |       |   |    |   |        |        |
| Chronic respiratory condition                                     | 24229 | 10659 | ( | 44 | ) | 13570 | ( | 56 | ) | -      | -      |
| Chronic non-respiratory condition                                 | 33644 | 15046 | ( | 45 | ) | 18598 | ( | 55 | ) | 0.136  | 0.003  |
| Asthma                                                            | 5773  | 1986  | ( | 34 | ) | 3787  | ( | 66 | ) | 0.197  | 0.018  |
| COPD                                                              | 11821 | 5667  | ( | 48 | ) | 6154  | ( | 52 | ) | -0.062 | -0.005 |
| Other Chronic Lung Disease                                        | 14908 | 6910  | ( | 46 | ) | 7998  | ( | 54 | ) | -0.021 | -0.009 |
| Heart Failure                                                     | 11871 | 5198  | ( | 44 | ) | 6673  | ( | 56 | ) | 0.054  | 0.003  |
| Ischemic Heart Disease                                            | 11952 | 5035  | ( | 42 | ) | 6917  | ( | 58 | ) | 0.101  | 0.006  |
| Hypertension                                                      | 24447 | 10403 | ( | 43 | ) | 14044 | ( | 57 | ) | 0.181  | 0.014  |
| Other Heart Disease                                               | 20204 | 8645  | ( | 43 | ) | 11559 | ( | 57 | ) | 0.131  | 0.012  |
| Stroke                                                            | 1673  | 859   | ( | 51 | ) | 814   | ( | 49 | ) | -      | -      |
| Other Cerebrovascular Disease                                     | 1790  | 846   | ( | 47 | ) | 944   | ( | 53 | ) | -      | -      |
| Diabetes Type 1                                                   | 215   | 93    | ( | 43 | ) | 122   | ( | 57 | ) | -      | -      |
| Diabetes Type 2                                                   | 12332 | 5336  | ( | 43 | ) | 6996  | ( | 57 | ) | -      | -      |
| Diabetes due to underlying conditions or other specified diabetes | 164   | 93    | ( | 57 | ) | 71    | ( | 43 | ) | -      | -      |
| Other Metabolic Disease (excluding diabetes)                      | 23541 | 9766  | ( | 41 | ) | 13775 | ( | 59 | ) | 0.229  | 0.015  |
| Clinical Obesity                                                  | 8190  | 3697  | ( | 45 | ) | 4493  | ( | 55 | ) | -      | -      |
| Clinical Underweight                                              | 4031  | 2189  | ( | 54 | ) | 1842  | ( | 46 | ) | -      | -      |
| Renal Disease                                                     | 12353 | 4896  | ( | 40 | ) | 7457  | ( | 60 | ) | 0.175  | 0.017  |
| Liver Disease                                                     | 3629  | 1709  | ( | 47 | ) | 1920  | ( | 53 | ) | -      | -      |
| Blood Disorder                                                    | 2864  | 1242  | ( | 43 | ) | 1622  | ( | 57 | ) | -      | -      |
| Immunosuppression                                                 | 14207 | 6137  | ( | 43 | ) | 8070  | ( | 57 | ) | 0.081  | 0.007  |
| Organ Transplant                                                  | 541   | 236   | ( | 44 | ) | 305   | ( | 56 | ) | -      | -      |
| Cancer                                                            | 5586  | 2428  | ( | 43 | ) | 3158  | ( | 57 | ) | 0.039  | 0.008  |
| Dementia                                                          | 3880  | 1774  | ( | 46 | ) | 2106  | ( | 54 | ) | -      | -      |
| Other Neurological/Musculoskeletal Disorder                       | 12490 | 5720  | ( | 46 | ) | 6770  | ( | 54 | ) | -0.002 | 0      |

|                                                |      |      |               |      |               |        |        |
|------------------------------------------------|------|------|---------------|------|---------------|--------|--------|
| Down Syndrome                                  | 13   | 9    | ( 69 )        | 4    | ( 31 )        | -      | -      |
| Time Considerations (Median, Q1-Q3)            |      |      |               |      |               |        |        |
| Epi-curve (days)                               | 4/18 | 4/08 | ( 3/11-5/06 ) | 4/25 | ( 3/31-5/17 ) | 0.462  | 0.045  |
| 7-day Moving Average Percent Positivity (days) | 3.99 | 4.94 | ( 3.2-6.4 )   | 3.14 | ( 1.3-5.1 )   | -0.571 | -0.041 |

<sup>1</sup>Variables with a SMD > 0.1 were included in PS weighting.

<sup>2</sup>Illustrates SMD prior to propensity weighting, to show differences between vaccinated and unvaccinated groups.

<sup>3</sup>SMD values after propensity weighting, SMD < 0.1 indicates no differences between groups, and that balance was achieved.

<sup>4</sup>Other race include Asian, Hawaiian or Other Pacific islander, American Indian or Alaskan Native, Other not-listed and multi-race.

## 2. Hospital VE Sensitivity Analysis: Between Partner Heterogeneity

In a sensitivity analysis examining potential heterogeneity in the VE estimates across partners, the mRNA VE estimates among COVID-19 hospitalizations were similar (range=82%-97% for full vaccination, and 64%-83% for partial 2-dose vaccination). Greater variability was observed across partners in the VE estimates for partial 1-dose vaccination (range=3%-69%) (Table S17).

In exploratory examinations of results heterogeneity, we examined estimates of VE across six Network partners for full mRNA vaccination and partial-1-dose mRNA vaccination against COVID-19 associated hospitalization (Figure S20). A stratified model for HealthPartners was not calculated because of relatively small sample size which was not adequate for propensity score calculation. For full mRNA vaccination, the Cochran's  $\chi^2$  (or Q-test) ( $Q [5]=9.2$ ,  $p=0.10$ ) did not reject the null hypothesis of homogeneity in VE across Network partners. The  $I^2$  index also indicated minimal heterogeneity in results ( $I^2=15.2\%$ ), using standard thresholds. In contrast, for partial-1-dose mRNA vaccination, both the Cochran's  $\chi^2$  (or Q-test) and  $I^2$  index indicated substantial heterogeneity in VE estimates across Network partners ( $Q[5]=7.5$ ,  $p=0.19$ ;  $I^2=34.6\%$ ).

**Figure S20. Messenger RNA (mRNA) vaccine effectiveness (VE) against COVID-19-associated hospitalizations by study site, with statistics assessing heterogeneity**

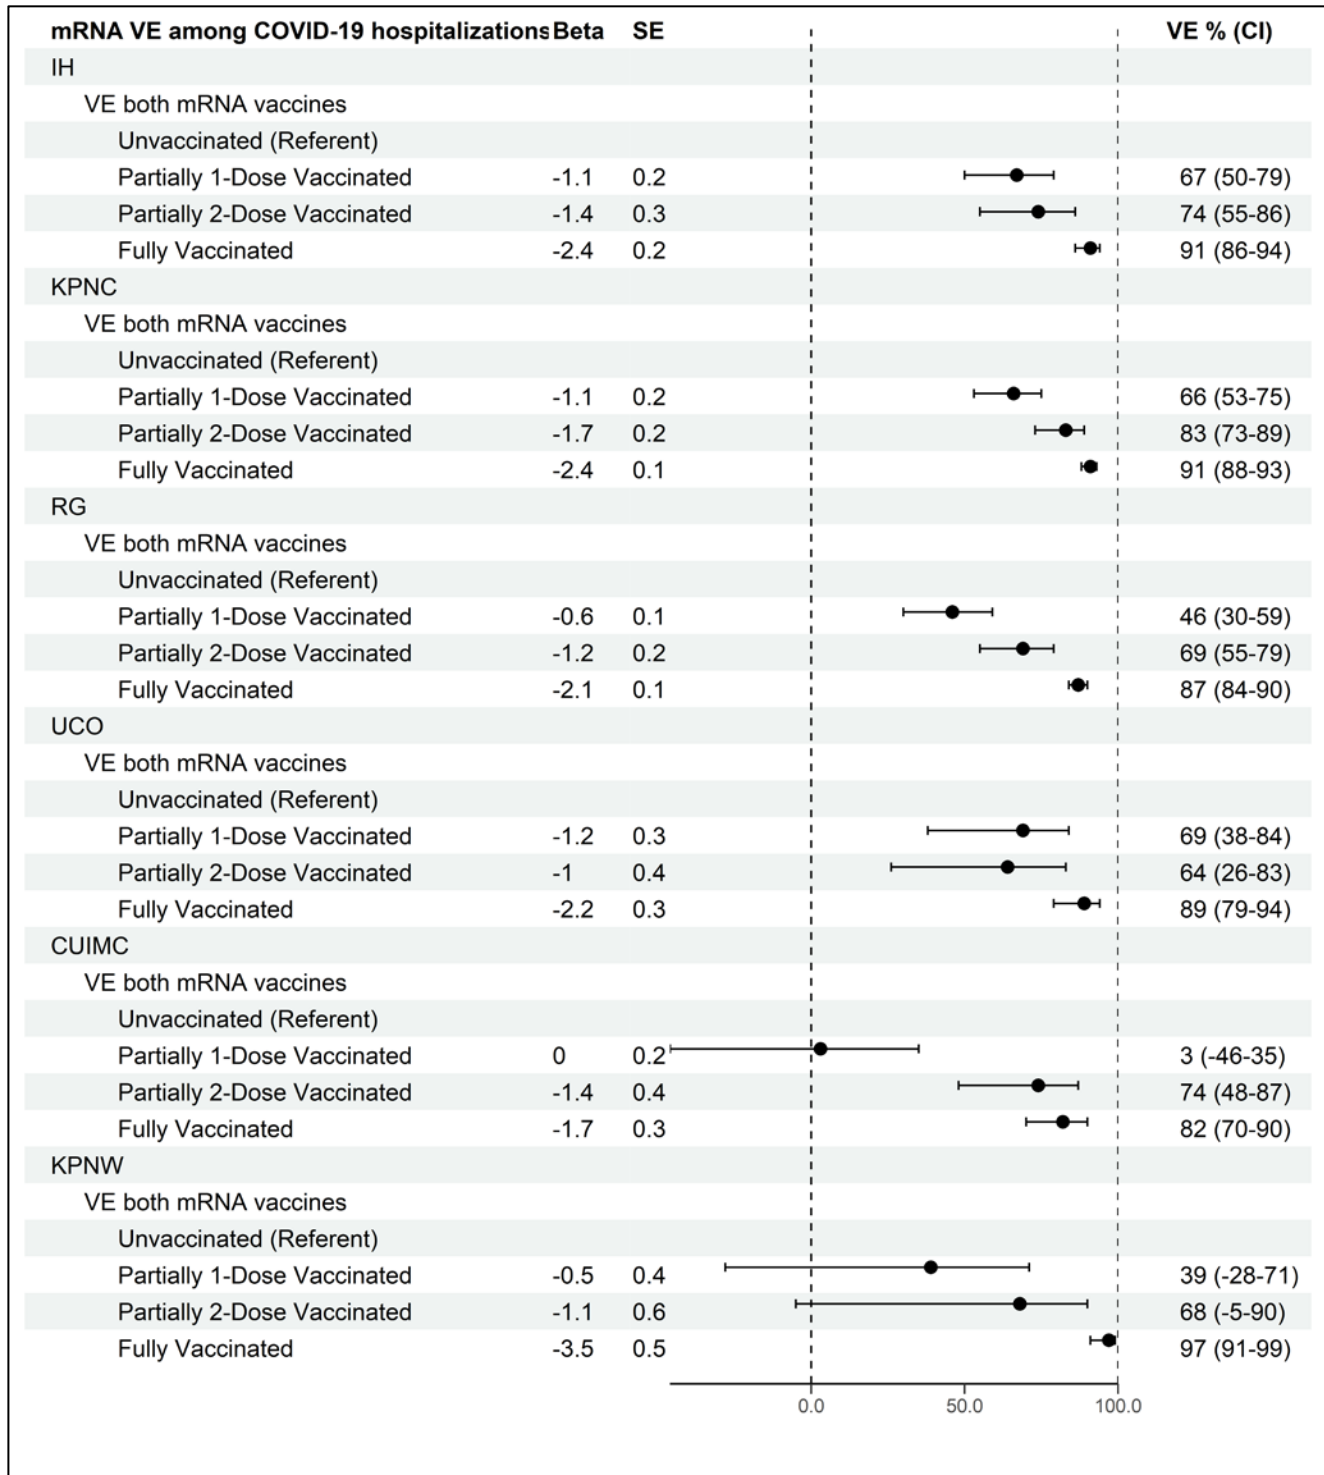

Abbreviations: Standard error = SE

For partial-1-dose vaccination, I<sup>2</sup> = 34.6%, Q = 7.5, p=0.19 (df=5)

For full vaccination, I<sup>2</sup> = 15.2%, Q = 9.2, p=0.10 (df=5)



### **3. Hospital VE Sensitivity Analysis: Alternative Clinical Outcomes**

In a sensitivity analysis to explore possible heterogeneity in VE by alternative clinical outcome, the mRNA VE among hospitalization with a clinical pneumonia diagnosis was 92% (95%CI=90%-94%) for full vaccination, 80% (95%CI=71%-86%) for partial 2-dose vaccination, and 49% (95%CI=36%-60%) for partial 1-dose vaccination. The mRNA VE among hospitalization with CLI as the primary discharge code was 88% (95%CI=86%-91%) for full vaccination, 68% (95%CI=57%-77%) for partial 2-dose vaccination, and 45% (95%CI=33%-56%) for partial 1-dose vaccination (Table S16). The mRNA VE estimates for both of these alternative outcomes were similar and had overlapping confidence intervals relative to the main mRNA VE estimate among COVID-19 hospitalizations.

#### **4. Hospital VE Sensitivity Analysis: Exclude Historical SARS-CoV-2 Positives**

In a sensitivity analysis excluding patients with any SARS-CoV-2 positive result from molecular or antigen assays >14 days prior to the index date, the mRNA VE among COVID-19 hospitalization was 90% (95%CI=88%-92%) for full vaccination, 73% (95%CI=64%-80%) for partial 2-dose vaccination, and 53% (95%CI=44%-61%) for partial 1-dose vaccination (Table S25). These estimates were very similar to VE estimates in the main analysis (differences of  $\leq 1\%$  points).

**Table S25. messenger RNA (mRNA) vaccine effectiveness (VE) among COVID-19-associated hospitalizations, intensive care unit (ICU) admissions, and emergency department and urgent care (ED/UC) medical events among those without historical positives**

|                                                       | <u>Total</u> | <u>SARS-CoV-2 Positive<sup>1</sup></u> | <u>( Row % )</u> | <u>%</u> | <u>VE<sup>2</sup></u><br><u>95% CI</u> |
|-------------------------------------------------------|--------------|----------------------------------------|------------------|----------|----------------------------------------|
| <b><u>mRNA VE among COVID-19 hospitalizations</u></b> |              |                                        |                  |          |                                        |
| VE both mRNA vaccines                                 |              |                                        |                  |          |                                        |
| Unvaccinated (Referent)                               | 15755        | 3039                                   | ( 19.3 )         |          |                                        |
| Partially 1-Dose Vaccinated                           | 1895         | 167                                    | ( 8.8 )          | 53       | ( 44 - 61 )                            |
| Partially 2-Dose Vaccinated                           | 1378         | 70                                     | ( 5.1 )          | 73       | ( 64 - 80 )                            |
| Fully Vaccinated                                      | 6549         | 135                                    | ( 2.1 )          | 90       | ( 88 - 92 )                            |
| VE of BioNTech-Pfizer mRNA                            |              |                                        |                  |          |                                        |
| Unvaccinated (Referent)                               | 15755        | 3039                                   | ( 19.3 )         |          |                                        |
| Partially 1-Dose Vaccinated                           | 919          | 107                                    | ( 11.6 )         | 25       | ( 5 - 41 )                             |
| Partially 2-Dose Vaccinated                           | 777          | 42                                     | ( 5.4 )          | 71       | ( 58 - 81 )                            |
| Fully Vaccinated                                      | 3645         | 87                                     | ( 2.4 )          | 88       | ( 84 - 90 )                            |
| VE of Moderna mRNA                                    |              |                                        |                  |          |                                        |
| Unvaccinated (Referent)                               | 15755        | 3039                                   | ( 19.3 )         |          |                                        |
| Partially 1-Dose Vaccinated                           | 976          | 60                                     | ( 6.1 )          | 70       | ( 60 - 78 )                            |
| Partially 2-Dose Vaccinated                           | 601          | 28                                     | ( 4.7 )          | 73       | ( 58 - 83 )                            |
| Fully Vaccinated                                      | 2904         | 48                                     | ( 1.7 )          | 93       | ( 90 - 95 )                            |
| <b><u>mRNA VE among COVID-19 ICU admission</u></b>    |              |                                        |                  |          |                                        |
| VE both mRNA vaccines                                 |              |                                        |                  |          |                                        |
| Unvaccinated (Referent)                               | 3181         | 592                                    | ( 18.6 )         |          |                                        |
| Partially 1-Dose Vaccinated                           | 286          | 23                                     | ( 8 )            | 50       | ( 17 - 70 )                            |
| Partially 2-Dose Vaccinated                           | 208          | 12                                     | ( 5.8 )          | 73       | ( 48 - 86 )                            |
| Fully Vaccinated                                      | 1018         | 23                                     | ( 2.3 )          | 90       | ( 84 - 94 )                            |
| <b><u>mRNA VE among COVID-19 ED/UC</u></b>            |              |                                        |                  |          |                                        |
| VE both mRNA vaccines                                 |              |                                        |                  |          |                                        |
| Unvaccinated (Referent)                               | 11134        | 2752                                   | ( 24.7 )         |          |                                        |
| Partially 1-Dose Vaccinated                           | 1794         | 145                                    | ( 8.1 )          | 68       | ( 61 - 74 )                            |

|                             |       |      |          |                |
|-----------------------------|-------|------|----------|----------------|
| Partially 2-Dose Vaccinated | 1201  | 56   | ( 4.7 )  | 83 ( 77 - 87 ) |
| Fully Vaccinated            | 5731  | 136  | ( 2.4 )  | 92 ( 90 - 93 ) |
| VE of BioNTech-Pfizer mRNA  |       |      |          |                |
| Unvaccinated (Referent)     | 11134 | 2752 | ( 24.7 ) |                |
| Partially 1-Dose Vaccinated | 864   | 84   | ( 9.7 )  | 59 ( 46 - 69 ) |
| Partially 2-Dose Vaccinated | 676   | 27   | ( 4 )    | 85 ( 77 - 90 ) |
| Fully Vaccinated            | 3441  | 94   | ( 2.7 )  | 90 ( 86 - 92 ) |
| VE of Moderna mRNA          |       |      |          |                |
| Unvaccinated (Referent)     | 11134 | 2752 | ( 24.7 ) |                |
| Partially 1-Dose Vaccinated | 930   | 61   | ( 6.6 )  | 74 ( 65 - 81 ) |
| Partially 2-Dose Vaccinated | 525   | 29   | ( 5.5 )  | 77 ( 64 - 85 ) |
| Fully Vaccinated            | 2290  | 42   | ( 1.8 )  | 93 ( 90 - 95 ) |

<sup>1</sup>SARS-CoV-2 infection confirmed by molecular assays.

<sup>2</sup>Adjusted model using inverse propensity weights, calculated using strata specific data, in regression doubly accounting for calendar time and daily virus circulation.

## 5. Hospital VE Sensitivity Analysis: Propensity of Clinical Testing for SARS-CoV-2

In a sensitivity analysis to examine potential bias introduced by clinician-ordered testing, inverse propensity weights (IPW) were calculated to account for both propensity to be vaccinated and propensity to be tested. The model for propensity for vaccination was built using only those who tested negative for SARS-CoV-2, while the model for propensity for testing was built with all the data. Among 38,130 CLI hospitalizations across the five partners contributing to this sensitivity analysis (HP, IH, KPNW, RG, and UCO), 25,663 (67%) had available test results for SARS-CoV-2 (Table S26). Among hospitalizations, testing percentage varied by site, ranging from 59% within IM to 95% within HP. Higher testing percentages were observed for encounters at tertiary hospitals (72%) or those in settings classified as large central metro/large fringe metro areas (74%), as well as among patients who were of other race (80%), Hispanic (77%), or unvaccinated (71% compared to 63% who received any COVID-19 vaccine).

The proportion of vaccination varied by partner, age, race, and ethnicity, and this variation was similar among both those tested and those not tested for SARS-CoV-2 (Table 2; Table S27).

The mRNA VE estimates among COVID-19 hospitalization accounting for testing and vaccination when excluding KPNC and CUIMC were 88% (95%CI=85%-90%) for full vaccination, 75% (95%CI=66%-81%) for partial 2-dose vaccination, and 59% (95%CI=48%-67%) for partial 1-dose vaccination (Table S28). In comparison, the mRNA VE estimates in the main analysis that accounted only for the propensity to be vaccinated were 89% (95%CI=87%-91%) for full vaccination, 73% (95%CI=66%-79%) for partial 2-dose vaccination, and 54% (95%CI=47%-61%) for partial 1-dose vaccination (Table S16).

**Table S26. Characteristics of adults with medically attended COVID-19-like illness and the percent with SARS-CoV-2 testing within 14 days prior to, or within <72 hours after, the time of hospital admission or emergency department or urgent care visit**

|                                | <b>Total Medical Events</b><br>N (Col. %) | <b>Tested for SARS-CoV-2</b><br>N (Row %) | <b>Not Tested for SARS-CoV-2</b><br>N (Row %) | <b>SMD</b> |
|--------------------------------|-------------------------------------------|-------------------------------------------|-----------------------------------------------|------------|
| <b>A. Hospitalizations</b>     |                                           |                                           |                                               |            |
| All hospitalizations           | 38130 (100)                               | 25663 (67)                                | 12467 (33)                                    |            |
| Sites                          |                                           |                                           |                                               | 0.75       |
| HealthPartners                 | 1046 (3)                                  | 989 (95)                                  | 57 (5)                                        |            |
| Intermountain Healthcare       | 6611 (17)                                 | 3910 (59)                                 | 2701 (41)                                     |            |
| Kaiser Permanente Northwest    | 2107 (6)                                  | 1953 (93)                                 | 154 (7)                                       |            |
| Regenstrief Institute          | 22597 (59)                                | 13496 (60)                                | 9101 (40)                                     |            |
| University of Colorado         | 5769 (15)                                 | 5315 (92)                                 | 454 (8)                                       |            |
| Age groups                     |                                           |                                           |                                               | 0.04       |
| 50-64 years                    | 9168 (24)                                 | 6113 (67)                                 | 3055 (33)                                     |            |
| 65-74 years                    | 12076 (32)                                | 8204 (68)                                 | 3872 (32)                                     |            |
| 75-84 years                    | 10918 (29)                                | 7306 (67)                                 | 3612 (33)                                     |            |
| ≥85 years                      | 5968 (16)                                 | 4040 (68)                                 | 1928 (32)                                     |            |
| Sex                            |                                           |                                           |                                               | 0.02       |
| Male                           | 18111 (47)                                | 12268 (68)                                | 5843 (32)                                     |            |
| Female                         | 20018 (52)                                | 13394 (67)                                | 6624 (33)                                     |            |
| Other/unknown                  | 1 (0)                                     | 1 (100)                                   | 0 (0)                                         |            |
| Race (regardless of ethnicity) |                                           |                                           |                                               | 0.24       |
| White                          | 29615 (78)                                | 19982 (67)                                | 9633 (33)                                     |            |
| Black                          | 2488 (7)                                  | 1933 (78)                                 | 555 (22)                                      |            |
| Other <sup>1</sup>             | 803 (2)                                   | 641 (80)                                  | 162 (20)                                      |            |
| Unknown                        | 5224 (14)                                 | 3107 (59)                                 | 2117 (41)                                     |            |
| Ethnicity (regardless of race) |                                           |                                           |                                               | 0.20       |
| Hispanic                       | 1394 (4)                                  | 1080 (77)                                 | 314 (23)                                      |            |
| Non-Hispanic                   | 31561 (83)                                | 21698 (69)                                | 9863 (31)                                     |            |
| Unknown                        | 5175 (14)                                 | 2885 (56)                                 | 2290 (44)                                     |            |
| Admitting Hospital Type        |                                           |                                           |                                               | 0.28       |

|                                                                     |            |            |            |      |
|---------------------------------------------------------------------|------------|------------|------------|------|
| Community                                                           | 14108 (37) | 8878 (63)  | 5230 (37)  |      |
| Tertiary                                                            | 21672 (57) | 15568 (72) | 6104 (28)  |      |
| Unknown                                                             | 2350 (6)   | 1217 (52)  | 1133 (48)  |      |
| Urban-Rural Classification of Facility                              |            |            |            | 0.37 |
| Large Central Metro/Large Fringe Metro                              | 18036 (47) | 13270 (74) | 4766 (26)  |      |
| Medium Metro/Small Metro                                            | 15315 (40) | 10127 (66) | 5188 (34)  |      |
| Micropolitan/Non-Core                                               | 2372 (6)   | 1000 (42)  | 1372 (58)  |      |
| Unknown                                                             | 2407 (6)   | 1266 (53)  | 1141 (47)  |      |
| Underlying respiratory condition at discharge                       |            |            |            | 0.18 |
| Chronic respiratory condition <sup>2</sup>                          | 21671 (57) | 15317 (71) | 6354 (29)  |      |
| None                                                                | 16459 (43) | 10346 (63) | 6113 (37)  |      |
| Underlying non-respiratory condition at discharge                   |            |            |            | 0.11 |
| Chronic non-respiratory condition <sup>3</sup>                      | 32348 (85) | 22118 (68) | 10230 (32) |      |
| None                                                                | 5782 (15)  | 3545 (61)  | 2237 (39)  |      |
| COVID-19-like illness (CLI) ICD discharge codes                     |            |            |            | 0.24 |
| $\geq 1$ CLI clinical diagnosis code <sup>4</sup>                   | 24480 (64) | 17431 (71) | 7049 (29)  |      |
| No clinical diagnosis but $\geq 1$ CLI sign or symptom <sup>5</sup> | 13650 (36) | 8232 (60)  | 5418 (40)  |      |
| CLI diagnosis and placement among discharge codes                   |            |            |            | 0.00 |
| CLI is first or primary diagnosis                                   | 12913 (34) | 8699 (67)  | 4214 (33)  |      |
| CLI is not first or primary diagnosis                               | 25217 (66) | 16964 (67) | 8253 (33)  |      |
| Intensive care unit (ICU) admissions                                |            |            |            | 0.17 |
| Admitted to ICU                                                     | 6128 (16)  | 4644 (76)  | 1484 (24)  |      |
| Not in ICU during hospitalization                                   | 32002 (84) | 21019 (66) | 10983 (34) |      |
| COVID-19 Vaccinations                                               |            |            |            | 0.20 |
| Unvaccinated                                                        | 21639 (57) | 15299 (71) | 6340 (29)  |      |
| BNT162b2 (Pfizer-BioNTech)                                          | 7865 (21)  | 5143 (65)  | 2722 (35)  |      |
| mRNA-1273 (Moderna)                                                 | 8151 (21)  | 4933 (61)  | 3218 (39)  |      |
| Ad26.COV2.S (Johnson & Johnson)                                     | 475 (1)    | 288 (61)   | 187 (39)   |      |

## B. Emergency Department (ED) and Urgent Care (UC) Visits

|                                        |             |            |            |       |
|----------------------------------------|-------------|------------|------------|-------|
| All ED and UC Visits                   | 71866 (100) | 22321 (31) | 49545 (69) |       |
| -                                      | -           | -          | -          | -     |
| By medical event setting               |             |            |            | -0.11 |
| ED visits                              | 59616 (83)  | 19154 (32) | 40462 (68) |       |
| UC visits                              | 12250 (17)  | 3167 (26)  | 9083 (74)  |       |
| Sites                                  |             |            |            | 0.19  |
| Intermountain Healthcare               | 29466 (41)  | 9008 (31)  | 20458 (69) |       |
| Kaiser Permanente Northwest            | 11441 (16)  | 4712 (41)  | 6729 (59)  |       |
| Regenstrief Institute                  | 30959 (43)  | 8601 (28)  | 22358 (72) |       |
| Age groups                             |             |            |            | 0.10  |
| 50-64 years                            | 26589 (37)  | 7674 (29)  | 18915 (71) |       |
| 65-74 years                            | 21715 (30)  | 6802 (31)  | 14913 (69) |       |
| 75-84 years                            | 16192 (23)  | 5400 (33)  | 10792 (67) |       |
| ≥85 years                              | 7370 (10)   | 2445 (33)  | 4925 (67)  |       |
| Sex                                    |             |            |            | 0.10  |
| Male                                   | 30090 (42)  | 10106 (34) | 19984 (66) |       |
| Female                                 | 41772 (58)  | 12214 (29) | 29558 (71) |       |
| Other/unknown                          | 4 (0)       | 1 (25)     | 3 (75)     |       |
| Race (regardless of ethnicity)         |             |            |            | 0.11  |
| White                                  | 57192 (80)  | 17999 (31) | 39193 (69) |       |
| Black                                  | 2758 (4)    | 869 (32)   | 1889 (68)  |       |
| Other <sup>1</sup>                     | 1965 (3)    | 744 (38)   | 1221 (62)  |       |
| Unknown                                | 9951 (14)   | 2709 (27)  | 7242 (73)  |       |
| Ethnicity (regardless of race)         |             |            |            | 0.09  |
| Hispanic                               | 3749 (5)    | 1184 (32)  | 2565 (68)  |       |
| Non-Hispanic                           | 57984 (81)  | 18462 (32) | 39522 (68) |       |
| Unknown                                | 10133 (14)  | 2675 (26)  | 7458 (74)  |       |
| Urban-Rural Classification of Facility |             |            |            | 0.14  |
| Large Central Metro/Large Fringe Metro | 28458 (40)  | 9580 (34)  | 18878 (66) |       |
| Medium Metro/Small Metro               | 29066 (40)  | 8925 (31)  | 20141 (69) |       |
| Micropolitan/Non-Core                  | 9943 (14)   | 2526 (25)  | 7417 (75)  |       |
| Unknown                                | 4399 (6)    | 1290 (29)  | 3109 (71)  |       |



|                                                                     |            |            |            |      |
|---------------------------------------------------------------------|------------|------------|------------|------|
| Underlying respiratory condition at discharge                       |            |            |            | 0.28 |
| Chronic respiratory condition <sup>2</sup>                          | 18577 (26) | 7678 (41)  | 10899 (59) |      |
| None                                                                | 53289 (74) | 14643 (27) | 38646 (73) |      |
| Underlying non-respiratory condition at discharge                   |            |            |            | 0.24 |
| Chronic non-respiratory condition <sup>3</sup>                      | 36403 (51) | 13139 (36) | 23264 (64) |      |
| None                                                                | 35463 (49) | 9182 (26)  | 26281 (74) |      |
| COVID-19-like illness (CLI) ICD discharge codes                     |            |            |            | 0.45 |
| $\geq 1$ CLI clinical diagnosis code <sup>4</sup>                   | 28121 (39) | 12107 (43) | 16014 (57) |      |
| No clinical diagnosis but $\geq 1$ CLI sign or symptom <sup>5</sup> | 43745 (61) | 10214 (23) | 33531 (77) |      |
| CLI diagnosis and placement among discharge codes                   |            |            |            | 0.03 |
| CLI is first or primary diagnosis                                   | 37144 (52) | 11760 (32) | 25384 (68) |      |
| CLI is not first or primary diagnosis                               | 34722 (48) | 10561 (30) | 24161 (70) |      |
| COVID-19 Vaccinations                                               |            |            |            | 0.24 |
| Unvaccinated                                                        | 34351 (48) | 12316 (36) | 22035 (64) |      |
| BNT162b2 (Pfizer-BioNTech)                                          | 19295 (27) | 5347 (28)  | 13948 (72) |      |
| mRNA-1273 (Moderna)                                                 | 16312 (23) | 4194 (26)  | 12118 (74) |      |
| Ad26.COV2.S (Johnson & Johnson)                                     | 1907 (3)   | 464 (24)   | 1443 (76)  |      |

Note: All patients with indeterminate immunization status (receipt of dose-1 of mRNA vaccine or J&J vaccine 1-13 days prior to index test date) were excluded from this table. Patients with SARS-CoV-2 testing, but only indeterminate or unknown result(s), are considered tested for the purpose of this table.

Abbreviations: Standard Mean Difference (SMD), COVID-like Illness (CLI), International Classification of Disease (ICD), Intensive Care Unit (ICU), Emergency Department (ED), Urgent Care (UC)

<sup>1</sup>Other race include: Asian, Hawaiian or Other Pacific islander, American Indian or Alaskan Native, Other not-listed and multi-race.

<sup>2</sup>Underlying chronic respiratory conditions include: asthma, chronic obstructive pulmonary disease (COPD), other lung disease.

<sup>3</sup>Underlying chronic non-respiratory conditions include: heart failure, ischemic heart disease, hypertension, other heart disease, stroke, other cerebrovascular disease, diabetes (type 1, 2 and due to other specified conditions), other metabolic disease, clinical obesity, clinically underweight, renal disease, liver disease, blood disorder, other immunosuppressive conditions, organ transplant recipient, cancer, dementia, neurological/musculoskeletal disorder or Down's syndrome.

<sup>4</sup>CLI clinical discharge diagnosis codes include: COVID-19 U codes, COVID-19 pneumonia, influenza pneumonia, other viral pneumonia, pneumonia and influenza (bacterial and other) influenza diases, acute respiratory distress syndrome (ARDS), COPD exacerbation, asthma exacerbation, respiratory failure, other acute lower respiratory tract infection, sinusitis, acute upper respiratory tract infection.

<sup>5</sup>CLI signs and symptoms include: hemoptysis, cough, dyspnea unspecified, chest pain or breathing/painful respiration, asphyxia, hypoxemia, pleurisy, respiratory arrest, abnormal sputum, other specified symptoms and signs involving the circulatory and respiratory systems, fever, chills (without fever), diarrhea, disturbance of taste or smell, headache, myalgia, sepsis, other malaise, other fatigue, shock (unspecified), debility (unspecified), altered level of consciousness/mental state, weakness, nausea and vomiting, rash or other nonspecific skin eruption, abdominal pain.

**Table S27. Characteristics of vaccinated and unvaccinated adults with medically attended COVID-19-like illness stratified by SARS-CoV-2 testing status within 14 days prior to, or within <72 hours after, the time of hospital admission or emergency department or urgent care visit**

|                                | <u>Tested for SARS-CoV-2</u>              |                                |                                    | <u>Not Tested for SARS-CoV-2</u> |                                |                                    |            |
|--------------------------------|-------------------------------------------|--------------------------------|------------------------------------|----------------------------------|--------------------------------|------------------------------------|------------|
|                                | <b>Total Medical Events</b><br>N (Col. %) | <b>Vaccinated</b><br>N (Row %) | <b>Not Vaccinated</b><br>N (Row %) | <b>SMD</b>                       | <b>Vaccinated</b><br>N (Row %) | <b>Not Vaccinated</b><br>N (Row %) | <b>SMD</b> |
| <b>A. Hospitalizations</b>     |                                           |                                |                                    |                                  |                                |                                    |            |
| All hospitalizations           | 38130 (100)                               | 10364 (40)                     | 15299 (60)                         |                                  | 6127 (49)                      | 6340 (51)                          |            |
| Sites                          |                                           |                                |                                    | 0.35                             |                                |                                    | 0.32       |
| HealthPartners                 | 1046 (3)                                  | 600 (61)                       | 389 (39)                           |                                  | 21 (37)                        | 36 (63)                            |            |
| Intermountain Healthcare       | 6611 (17)                                 | 1993 (51)                      | 1917 (49)                          |                                  | 1596 (59)                      | 1105 (41)                          |            |
| Kaiser Permanente Northwest    | 2107 (6)                                  | 1046 (54)                      | 907 (46)                           |                                  | 82 (53)                        | 72 (47)                            |            |
| Regenstrief Institute          | 22597 (59)                                | 5272 (39)                      | 8224 (61)                          |                                  | 4377 (48)                      | 4724 (52)                          |            |
| University of Colorado         | 5769 (15)                                 | 1453 (27)                      | 3862 (73)                          |                                  | 51 (11)                        | 403 (89)                           |            |
| Age groups                     |                                           |                                |                                    | 0.36                             |                                |                                    | 0.36       |
| 50-64 years                    | 9168 (24)                                 | 1673 (27)                      | 4440 (73)                          |                                  | 1074 (35)                      | 1981 (65)                          |            |
| 65-74 years                    | 12076 (32)                                | 3214 (39)                      | 4990 (61)                          |                                  | 1851 (48)                      | 2021 (52)                          |            |
| 75-84 years                    | 10918 (29)                                | 3455 (47)                      | 3851 (53)                          |                                  | 2029 (56)                      | 1583 (44)                          |            |
| ≥85 years                      | 5968 (16)                                 | 2022 (50)                      | 2018 (50)                          |                                  | 1173 (61)                      | 755 (39)                           |            |
| Sex                            |                                           |                                |                                    | 0.06                             |                                |                                    | 0.06       |
| Male                           | 18111 (47)                                | 4782 (39)                      | 7486 (61)                          |                                  | 2778 (48)                      | 3065 (52)                          |            |
| Female                         | 20018 (52)                                | 5582 (42)                      | 7812 (58)                          |                                  | 3349 (51)                      | 3275 (49)                          |            |
| Other/unknown                  | 1 (0)                                     | 0 (0)                          | 1 (100)                            |                                  |                                |                                    |            |
| Race (regardless of ethnicity) |                                           |                                |                                    | 0.18                             |                                |                                    | 0.22       |
| White                          | 29615 (78)                                | 8420 (42)                      | 11562 (58)                         |                                  | 5003 (52)                      | 4630 (48)                          |            |
| Black                          | 2488 (7)                                  | 485 (25)                       | 1448 (75)                          |                                  | 208 (37)                       | 347 (63)                           |            |
| Other <sup>1</sup>             | 803 (2)                                   | 261 (41)                       | 380 (59)                           |                                  | 72 (44)                        | 90 (56)                            |            |
| Unknown                        | 5224 (14)                                 | 1198 (39)                      | 1909 (61)                          |                                  | 844 (40)                       | 1273 (60)                          |            |
| Ethnicity (regardless of race) |                                           |                                |                                    | 0.10                             |                                |                                    | 0.17       |
| Hispanic                       | 1394 (4)                                  | 281 (26)                       | 799 (74)                           |                                  | 108 (34)                       | 206 (66)                           |            |
| Non-Hispanic                   | 31561 (83)                                | 8862 (41)                      | 12836 (59)                         |                                  | 5075 (51)                      | 4788 (49)                          |            |
| Unknown                        | 5175 (14)                                 | 1221 (42)                      | 1664 (58)                          |                                  | 944 (41)                       | 1346 (59)                          |            |

|                                                                     |            |            |             |       |            |            |       |
|---------------------------------------------------------------------|------------|------------|-------------|-------|------------|------------|-------|
| Admitting Hospital Type                                             |            |            |             | 0.05  |            |            | 0.13  |
| Community                                                           | 14108 (37) | 3600 (41)  | 5278 (59)   |       | 2742 (52)  | 2488 (48)  |       |
| Tertiary                                                            | 21672 (57) | 6285 (40)  | 9283 (60)   |       | 2888 (47)  | 3216 (53)  |       |
| Unknown                                                             | 2350 (6)   | 479 (39)   | 738 (61)    |       | 497 (44)   | 636 (56)   |       |
| Urban-Rural Classification of Facility                              |            |            |             | 0.09  |            |            | 0.10  |
| Large Central Metro/Large Fringe Metro                              | 18036 (47) | 5583 (42)  | 7687 (58)   |       | 2474 (52)  | 2292 (48)  |       |
| Medium Metro/Small Metro                                            | 15315 (40) | 3896 (38)  | 6231 (62)   |       | 2525 (49)  | 2663 (51)  |       |
| Micropolitan/Non-Core                                               | 2372 (6)   | 378 (38)   | 622 (62)    |       | 626 (46)   | 746 (54)   |       |
| Unknown                                                             | 2407 (6)   | 507 (40)   | 759 (60)    |       | 502 (44)   | 639 (56)   |       |
| Underlying respiratory condition at discharge                       |            |            |             | -0.02 |            |            | -0.03 |
| Chronic respiratory condition <sup>2</sup>                          | 21671 (57) | 6121 (40)  | 9196 (60)   |       | 3069 (48)  | 3285 (52)  |       |
| None                                                                | 16459 (43) | 4243 (41)  | 6103 (59)   |       | 3058 (50)  | 3055 (50)  |       |
| Underlying non-respiratory condition at discharge                   |            |            |             | 0.08  |            |            | 0.06  |
| Chronic non-respiratory condition <sup>3</sup>                      | 32348 (85) | 9100 (41)  | 13018 (59)  |       | 5099 (50)  | 5131 (50)  |       |
| None                                                                | 5782 (15)  | 1264 (36)  | 2281 (64)   |       | 1028 (46)  | 1209 (54)  |       |
| COVID-19-like illness (CLI) ICD discharge codes                     |            |            |             | -0.12 |            |            | -0.11 |
| $\geq 1$ CLI clinical diagnosis code <sup>4</sup>                   | 24480 (64) | 6686 (38)  | 10745 (62)  |       | 3290 (47)  | 3759 (53)  |       |
| No clinical diagnosis but $\geq 1$ CLI sign or symptom <sup>5</sup> | 13650 (36) | 3678 (45)  | 4554 (55)   |       | 2837 (52)  | 2581 (48)  |       |
| CLI diagnosis and placement among discharge codes                   |            |            |             | -0.12 |            |            | -0.14 |
| CLI is first or primary diagnosis                                   | 12913 (34) | 3150 (36)  | 5549 (64)   |       | 1868 (44)  | 2346 (56)  |       |
| CLI is not first or primary diagnosis                               | 25217 (66) | 7214 (43)  | 9750 (57)   |       | 4259 (52)  | 3994 (48)  |       |
| Intensive care unit (ICU) admissions                                |            |            |             | -0.13 |            |            | -0.07 |
| Admitted to ICU                                                     | 6128 (16)  | 1574 (34)  | 3070 (66)   |       | 656 (44)   | 828 (56)   |       |
| Not in ICU during hospitalization                                   | 32002 (84) | 8790 (42)  | 12229 (58)  |       | 5471 (50)  | 5512 (50)  |       |
| COVID-19 Vaccinations                                               |            |            |             |       |            |            |       |
| Unvaccinated                                                        | 21639 (57) | 0 (0)      | 15299 (100) |       | 0 (0)      | 6340 (100) |       |
| BNT162b2 (Pfizer-BioNTech)                                          | 7865 (21)  | 5143 (100) | 0 (0)       |       | 2722 (100) | 0 (0)      |       |
| mRNA-1273 (Moderna)                                                 | 8151 (21)  | 4933 (100) | 0 (0)       |       | 3218 (100) | 0 (0)      |       |

|                                                                 |             |            |            |            |            |      |
|-----------------------------------------------------------------|-------------|------------|------------|------------|------------|------|
| Ad26.COV2.S (Johnson & Johnson)                                 | 475 (1)     | 288 (100)  | 0 (0)      | 187 (100)  | 0 (0)      |      |
| <b>B. Emergency Department (ED) and Urgent Care (UC) Visits</b> |             |            |            |            |            |      |
| All ED and UC Visits                                            | 71866 (100) | 10005 (45) | 12316 (55) | 27509 (56) | 22035 (44) |      |
| -                                                               | -           | -          | -          | -          | -          | -    |
| By medical event setting                                        |             |            |            | 0.14       |            | 0.21 |
| ED visits                                                       | 59616 (83)  | 8310 (43)  | 10844 (57) | 21475 (53) | 18987 (47) |      |
| UC visits                                                       | 12250 (17)  | 1695 (54)  | 1472 (46)  | 6034 (66)  | 3048 (34)  |      |
| Sites                                                           |             |            |            | 0.33       |            | 0.33 |
| Intermountain Healthcare                                        | 29466 (41)  | 4388 (49)  | 4620 (51)  | 12697 (62) | 7761 (38)  |      |
| Kaiser Permanente Northwest                                     | 11441 (16)  | 2591 (55)  | 2121 (45)  | 4333 (64)  | 2395 (36)  |      |
| Regenstrief Institute                                           | 30959 (43)  | 3026 (35)  | 5575 (65)  | 10479 (47) | 11879 (53) |      |
| Age groups                                                      |             |            |            | 0.41       |            | 0.35 |
| 50-64 years                                                     | 26589 (37)  | 2539 (33)  | 5135 (67)  | 8513 (45)  | 10402 (55) |      |
| 65-74 years                                                     | 21715 (30)  | 3134 (46)  | 3668 (54)  | 8676 (58)  | 6237 (42)  |      |
| 75-84 years                                                     | 16192 (23)  | 2949 (55)  | 2451 (45)  | 7022 (65)  | 3769 (35)  |      |
| ≥85 years                                                       | 7370 (10)   | 1383 (57)  | 1062 (43)  | 3298 (67)  | 1627 (33)  |      |
| Sex                                                             |             |            |            | 0.04       |            | 0.06 |
| Male                                                            | 30090 (42)  | 4417 (44)  | 5689 (56)  | 10793 (54) | 9191 (46)  |      |
| Female                                                          | 41772 (58)  | 5588 (46)  | 6626 (54)  | 16715 (57) | 12842 (43) |      |
| Other/unknown                                                   | 4 (0)       | 0 (0)      | 1 (100)    | 1 (33)     | 2 (67)     |      |
| Race (regardless of ethnicity)                                  |             |            |            | 0.22       |            | 0.24 |
| White                                                           | 57192 (80)  | 8396 (47)  | 9603 (53)  | 22748 (58) | 16444 (42) |      |
| Black                                                           | 2758 (4)    | 244 (28)   | 625 (72)   | 783 (41)   | 1106 (59)  |      |
| Other <sup>1</sup>                                              | 1965 (3)    | 351 (47)   | 393 (53)   | 734 (60)   | 487 (40)   |      |
| Unknown                                                         | 9951 (14)   | 1014 (37)  | 1695 (63)  | 3244 (45)  | 3998 (55)  |      |
| Ethnicity (regardless of race)                                  |             |            |            | 0.14       |            | 0.18 |
| Hispanic                                                        | 3749 (5)    | 453 (38)   | 731 (62)   | 1337 (52)  | 1228 (48)  |      |
| Non-Hispanic                                                    | 57984 (81)  | 8553 (46)  | 9909 (54)  | 22848 (58) | 16673 (42) |      |
| Unknown                                                         | 10133 (14)  | 999 (37)   | 1676 (63)  | 3324 (45)  | 4134 (55)  |      |
| Urban-Rural Classification of Facility                          |             |            |            | 0.14       |            | 0.16 |
| Large Central Metro/Large Fringe Metro                          | 28458 (40)  | 4537 (47)  | 5043 (53)  | 11160 (59) | 7717 (41)  |      |

|                                                               |            |            |             |             |             |
|---------------------------------------------------------------|------------|------------|-------------|-------------|-------------|
| Medium Metro/Small Metro                                      | 29066 (40) | 3968 (44)  | 4957 (56)   | 11114 (55)  | 9027 (45)   |
| Micropolitan/Non-Core                                         | 9943 (14)  | 938 (37)   | 1588 (63)   | 3542 (48)   | 3875 (52)   |
| Unknown                                                       | 4399 (6)   | 562 (44)   | 728 (56)    | 1693 (54)   | 1416 (46)   |
| Underlying respiratory condition at discharge                 |            |            |             | 0.08        | 0.04        |
| Chronic respiratory condition <sup>2</sup>                    | 18577 (26) | 3653 (48)  | 4025 (52)   | 6243 (57)   | 4656 (43)   |
| None                                                          | 53289 (74) | 6352 (43)  | 8291 (57)   | 21266 (55)  | 17379 (45)  |
| Underlying non-respiratory condition at discharge             |            |            |             | 0.17        | 0.10        |
| Chronic non-respiratory condition <sup>3</sup>                | 36403 (51) | 6354 (48)  | 6785 (52)   | 13525 (58)  | 9738 (42)   |
| None                                                          | 35463 (49) | 3651 (40)  | 5531 (60)   | 13984 (53)  | 12297 (47)  |
| COVID-19-like illness (CLI) ICD discharge codes               |            |            |             | -0.16       | -0.01       |
| ≥1 CLI clinical diagnosis code <sup>4</sup>                   | 28121 (39) | 5001 (41)  | 7106 (59)   | 8834 (55)   | 7180 (45)   |
| No clinical diagnosis but ≥1 CLI sign or symptom <sup>5</sup> | 43745 (61) | 5004 (49)  | 5210 (51)   | 18675 (56)  | 14855 (44)  |
| CLI diagnosis and placement among discharge codes             |            |            |             | -0.26       | -0.10       |
| CLI is first or primary diagnosis                             | 37144 (52) | 4569 (39)  | 7191 (61)   | 13512 (53)  | 11872 (47)  |
| CLI is not first or primary diagnosis                         | 34722 (48) | 5436 (51)  | 5125 (49)   | 13997 (58)  | 10163 (42)  |
| COVID-19 Vaccinations                                         |            |            |             |             |             |
| Unvaccinated                                                  | 34351 (48) | 0 (0)      | 12316 (100) | 0 (0)       | 22035 (100) |
| BNT162b2 (Pfizer-BioNTech)                                    | 19295 (27) | 5347 (100) | 0 (0)       | 13948 (100) | 0 (0)       |
| mRNA-1273 (Moderna)                                           | 16312 (23) | 4194 (100) | 0 (0)       | 12118 (100) | 0 (0)       |
| Ad26.COV2.S (Johnson & Johnson)                               | 1907 (3)   | 464 (100)  | 0 (0)       | 1443 (100)  | 0 (0)       |

Note: All patients with indeterminate immunization status (receipt of dose-1 of mRNA vaccine or J&J vaccine 1-13 days prior to index test date) were excluded from this table. Patients with SARS-CoV-2 testing, but only indeterminate or unknown result(s), are considered tested for the purpose of this table.

Abbreviations: Standard Mean Difference (SMD), COVID-like Illness (CLI), International Classification of Disease (ICD), Intensive Care Unit (ICU), Emergency Department (ED), Urgent Care (UC)

<sup>1</sup>Other race include Asian, Hawaiian or Other Pacific islander, American Indian or Alaskan Native, Other not-listed and multi-race.

<sup>2</sup>Underlying chronic respiratory conditions include asthma, chronic obstructive pulmonary disease (COPD), other lung disease.

<sup>3</sup>Underlying chronic non-respiratory conditions include heart failure, ischemic heart disease, hypertension, other heart disease, stroke, other cerebrovascular disease, diabetes (type 1, 2 and due to other specified conditions), other metabolic disease, clinical obesity, clinically underweight, renal disease, liver disease, blood disorder, other immunosuppressive conditions, organ transplant recipient, cancer, dementia, neurological/musculoskeletal disorder or Down's syndrome.

<sup>4</sup>CLI clinical discharge diagnosis codes include: COVID-19 U codes, COVID-19 pneumonia, influenza pneumonia, other viral pneumonia, pneumonia and influenza (bacterial and other) influenza disease, acute respiratory distress syndrome (ARDS), COPD exacerbation, asthma exacerbation, respiratory failure, other acute lower respiratory tract infection, sinusitis, acute upper respiratory tract infection.

<sup>5</sup>CLI signs and symptoms include: hemoptysis, cough, dyspnea unspecified, chest pain or breathing/painful respiration, asphyxia, hypoxemia, pleurisy, respiratory arrest, abnormal sputum, other specified symptoms and signs involving the circulatory and respiratory systems, fever, chills (without fever), diarrhea, disturbance of taste or smell, headache, myalgia, sepsis, other malaise, other fatigue, shock (unspecified), debility (unspecified), altered level of consciousness/mental state, weakness, nausea and vomiting, rash or other nonspecific skin eruption, abdominal pain.

**Table\_S28. messenger RNA (mRNA) vaccine effectiveness (VE) against COVID-19-associated hospitalization and emergency department and urgent care (ED/UC) medical events after accounting for likelihood of testing**

|                                                             | <b>Total</b> | <b>SARS-CoV-2<br/>Positive</b> | <b>( Row % )</b> | <b>VE before Adjusted Model</b> |                   | <b>VE using primary model<br/>without adjustment for testing</b> |                   | <b>VE with inverse weights for<br/>propensity to be vaccinated<br/>multiplied by propensity to be<br/>clinically tested</b> |                   |
|-------------------------------------------------------------|--------------|--------------------------------|------------------|---------------------------------|-------------------|------------------------------------------------------------------|-------------------|-----------------------------------------------------------------------------------------------------------------------------|-------------------|
|                                                             |              |                                |                  | <b>%</b>                        | <b>( 95% CI )</b> | <b>%</b>                                                         | <b>( 95% CI )</b> | <b>%</b>                                                                                                                    | <b>( 95% CI )</b> |
| <u>mRNA VE against COVID-19 hospitalization<sup>1</sup></u> |              |                                |                  |                                 |                   |                                                                  |                   |                                                                                                                             |                   |
| VE both mRNA vaccines (aged ≥50 years)                      |              |                                |                  |                                 |                   |                                                                  |                   |                                                                                                                             |                   |
| Unvaccinated (Referent)                                     | 14666        | 2612                           | ( 17.8 )         |                                 |                   |                                                                  |                   |                                                                                                                             |                   |
| Partially 1-Dose Vaccinated                                 | 1846         | 145                            | ( 7.8 )          | 61                              | ( 53 - 67 )       | 57                                                               | ( 48 - 64 )       | 59                                                                                                                          | ( 48 - 67 )       |
| Partially 2-Dose Vaccinated                                 | 1399         | 70                             | ( 5.0 )          | 76                              | ( 69 - 81 )       | 72                                                               | ( 63 - 79 )       | 75                                                                                                                          | ( 66 - 81 )       |
| Fully Vaccinated                                            | 6412         | 142                            | ( 2.2 )          | 90                              | ( 88 - 91 )       | 90                                                               | ( 87 - 91 )       | 88                                                                                                                          | ( 85 - 90 )       |
| <u>mRNA VE against COVID-19 ED/UC</u>                       |              |                                |                  |                                 |                   |                                                                  |                   |                                                                                                                             |                   |
| VE both mRNA vaccines (aged ≥50 years)                      |              |                                |                  |                                 |                   |                                                                  |                   |                                                                                                                             |                   |
| Unvaccinated (Referent)                                     | 11812        | 2847                           | ( 24.1 )         |                                 |                   |                                                                  |                   |                                                                                                                             |                   |
| Partially 1-Dose Vaccinated                                 | 1920         | 155                            | ( 8.1 )          | 72                              | ( 67 - 77 )       | 68                                                               | ( 61 - 74 )       | 70                                                                                                                          | ( 62 - 75 )       |
| Partially 2-Dose Vaccinated                                 | 1269         | 66                             | ( 5.2 )          | 83                              | ( 78 - 87 )       | 80                                                               | ( 73 - 85 )       | 83                                                                                                                          | ( 76 - 88 )       |
| Fully Vaccinated                                            | 6065         | 154                            | ( 2.5 )          | 92                              | ( 90 - 93 )       | 91                                                               | ( 89 - 93 )       | 91                                                                                                                          | ( 88 - 92 )       |

<sup>1</sup>Hospitalization estimates do not include KPNC or CU

## **E. Messenger RNA COVID-19 Vaccine Effectiveness among COVID-19-associated Emergency Department and Urgent Care Encounters**

### **1. Variables included in inverse propensity to be vaccinated weights for ED/UC**

In examining the association with COVID-19 infection status, the variables that had a SMD of  $>0.1$ , and thus were potential confounders included in the inverse-propensity-to-be-vaccinated weights, were site-region, race, ethnicity, age, urban-rural classification of the facility, underlying conditions (including specific conditions), and 7-day moving average percent positivity (Table S29). Epidemiologic days was included as an *a priori* decision. Of these variables, site-region, age, race, ethnicity, several underlying medical conditions, and epidemiologic days were also unbalanced by vaccination status (SMD of  $>0.1$  in a bivariate association with vaccination before their inclusion in the propensity to be vaccinated weights).

The distribution of weights from each of the VE models for ED/UC is presented in Table S30. Across models, outliers were at the extreme upper ends of the distributions. Therefore, weights were truncated at the 99.9 percentile for each model. Table S30 lists the relatively small number of medical events in each model that received the truncated weight.

After inverse-propensity-to-be-vaccinated weighting, all variables were balanced across the vaccinated and unvaccinated groups (all with SMD  $<0.05$ ); see Table S31.

VE estimates were similar to VE estimates before adjustment, with most having  $<10\%$  difference (Table S19). The largest differences between VE estimates before and after adjustments were seen for estimates for the partial 1-dose vaccinations.



**Table S29. Bivariate associations between covariates of interest and COVID-19 infection status for emergency department and urgent care medical events**

|                                                         | Sample |            | SARS-CoV-2 Negatives |           | SARS-CoV-2 Positives |           | SMD <sup>1</sup> | Is variable included in Propensity Model <sup>2</sup> |
|---------------------------------------------------------|--------|------------|----------------------|-----------|----------------------|-----------|------------------|-------------------------------------------------------|
|                                                         | N      | ( Col. % ) | N                    | ( Row % ) | N                    | ( Row % ) |                  |                                                       |
| <b>A. Emergency department and urgent care</b>          |        |            |                      |           |                      |           |                  |                                                       |
| All emergency department and urgent care medical events | 21066  | ( 100 )    | 17844                | ( 84.7 )  | 3222                 | ( 15.3 )  |                  |                                                       |
| Site Characteristics                                    |        |            |                      |           |                      |           |                  |                                                       |
| Site-region                                             |        |            |                      |           |                      |           | 0.42             | Yes                                                   |
| Intermountain Healthcare - site-region 1                | 593    | ( 2.8 )    | 510                  | ( 86.0 )  | 83                   | ( 14.0 )  |                  |                                                       |
| Intermountain Healthcare - site-region 2                | 353    | ( 1.7 )    | 275                  | ( 77.9 )  | 78                   | ( 22.1 )  |                  |                                                       |
| Intermountain Healthcare - site-region 3                | 3185   | ( 15.1 )   | 2792                 | ( 87.7 )  | 393                  | ( 12.3 )  |                  |                                                       |
| Intermountain Healthcare - site-region 4                | 1402   | ( 6.7 )    | 1150                 | ( 82.0 )  | 252                  | ( 18.0 )  |                  |                                                       |
| Intermountain Healthcare - site-region 5                | 302    | ( 1.4 )    | 254                  | ( 84.1 )  | 48                   | ( 15.9 )  |                  |                                                       |
| Intermountain Healthcare - site-region 6                | 1113   | ( 5.3 )    | 951                  | ( 85.4 )  | 162                  | ( 14.6 )  |                  |                                                       |
| Intermountain Healthcare - site-region 7                | 278    | ( 1.3 )    | 236                  | ( 84.9 )  | 42                   | ( 15.1 )  |                  |                                                       |
| Intermountain Healthcare - site-region 8                | 1551   | ( 7.4 )    | 1229                 | ( 79.2 )  | 322                  | ( 20.8 )  |                  |                                                       |
| Kaiser Permanente Northwest - site-region 1             | 2122   | ( 10.1 )   | 1930                 | ( 91.0 )  | 192                  | ( 9.0 )   |                  |                                                       |
| Kaiser Permanente Northwest - site-region 2             | 1912   | ( 9.1 )    | 1768                 | ( 92.5 )  | 144                  | ( 7.5 )   |                  |                                                       |
| Kaiser Permanente Northwest - site-region 3             | 535    | ( 2.5 )    | 470                  | ( 87.9 )  | 65                   | ( 12.1 )  |                  |                                                       |
| Regenstrief Institute - site-region 1                   | 885    | ( 4.2 )    | 697                  | ( 78.8 )  | 188                  | ( 21.2 )  |                  |                                                       |
| Regenstrief Institute - site-region 2                   | 191    | ( 0.9 )    | 179                  | ( 93.7 )  | 12                   | ( 6.3 )   |                  |                                                       |
| Regenstrief Institute - site-region 3                   | 504    | ( 2.4 )    | 408                  | ( 81.0 )  | 96                   | ( 19.0 )  |                  |                                                       |
| Regenstrief Institute - site-region 4                   | 289    | ( 1.4 )    | 154                  | ( 53.3 )  | 135                  | ( 46.7 )  |                  |                                                       |
| Regenstrief Institute - site-region 5                   | 870    | ( 4.1 )    | 684                  | ( 78.6 )  | 186                  | ( 21.4 )  |                  |                                                       |
| Regenstrief Institute - site-region 6                   | 2299   | ( 10.9 )   | 1930                 | ( 83.9 )  | 369                  | ( 16.1 )  |                  |                                                       |
| Regenstrief Institute - site-region 7                   | 631    | ( 3.0 )    | 522                  | ( 82.7 )  | 109                  | ( 17.3 )  |                  |                                                       |
| Regenstrief Institute - site-region 8                   | 173    | ( 0.8 )    | 150                  | ( 86.7 )  | 23                   | ( 13.3 )  |                  |                                                       |
| Regenstrief Institute - site-region 9                   | 700    | ( 3.3 )    | 572                  | ( 81.7 )  | 128                  | ( 18.3 )  |                  |                                                       |
| Regenstrief Institute - site-region 10                  | 391    | ( 1.9 )    | 338                  | ( 86.4 )  | 53                   | ( 13.6 )  |                  |                                                       |
| Regenstrief Institute - site-region missing             | 787    | ( 3.7 )    | 645                  | ( 82.0 )  | 142                  | ( 18.0 )  |                  |                                                       |
| Patient Characteristics                                 |        |            |                      |           |                      |           |                  |                                                       |
| Sex                                                     |        |            |                      |           |                      |           |                  |                                                       |
| Female                                                  | 11489  | ( 54.5 )   | 9862                 | ( 85.8 )  | 1627                 | ( 14.2 )  | 0.1              | No                                                    |
| Male                                                    | 9577   | ( 45.5 )   | 7982                 | ( 83.3 )  | 1595                 | ( 16.6 )  |                  |                                                       |
| Race                                                    |        |            |                      |           |                      |           | 0.17             | Yes                                                   |

|                                                         |       |   |      |   |       |   |      |   |       |   |      |      |      |     |
|---------------------------------------------------------|-------|---|------|---|-------|---|------|---|-------|---|------|------|------|-----|
| White                                                   | 17191 | ( | 81.6 | ) | 14738 | ( | 85.7 | ) | 2453  | ( | 14.3 | )    |      |     |
| Black                                                   | 818   | ( | 3.9  | ) | 641   | ( | 78.4 | ) | 177   | ( | 21.6 | )    |      |     |
| Other <sup>3</sup>                                      | 724   | ( | 3.4  | ) | 609   | ( | 84.1 | ) | 115   | ( | 15.9 | )    |      |     |
| Unknown                                                 | 2333  | ( | 11.1 | ) | 1856  | ( | 79.6 | ) | 477   | ( | 20.4 | )    |      |     |
| Ethnicity                                               |       |   |      |   |       |   |      |   |       |   |      | 0.21 | Yes  |     |
| Hispanic/Latinx Ethnicity                               | 1142  | ( | 5.4  | ) | 852   | ( | 74.6 | ) | 290   | ( | 25.4 | )    |      |     |
| Not Hispanic/Latinx Ethnicity                           | 17762 | ( | 84.3 | ) | 15247 | ( | 85.8 | ) | 2515  | ( | 14.2 | )    |      |     |
| Unknown                                                 | 2162  | ( | 10.3 | ) | 1745  | ( | 80.7 | ) | 417   | ( | 19.3 | )    |      |     |
| Age, continuous (mean, std)                             | 69.9  | ( | 11.4 | ) | 70.54 | ( | 11.4 | ) | 66.34 | ( | 10.8 | )    | 0.38 | Yes |
| Setting Characteristics                                 |       |   |      |   |       |   |      |   |       |   |      | 0.21 | Yes  |     |
| Urban-Rural Classification of Facility                  | 9252  | ( | 43.9 | ) | 8072  | ( | 87.2 | ) | 1180  | ( | 12.8 | )    |      |     |
| Large Central Metro/Large Fringe Metro                  | 8420  | ( | 40.0 | ) | 7045  | ( | 83.7 | ) | 1375  | ( | 16.3 | )    |      |     |
| Medium Metro/Small Metro                                | 2228  | ( | 10.6 | ) | 1746  | ( | 78.4 | ) | 482   | ( | 21.6 | )    |      |     |
| Micropolitan/Non-Core                                   | 1166  | ( | 5.5  | ) | 981   | ( | 84.1 | ) | 185   | ( | 15.9 | )    |      |     |
| Unknown                                                 |       |   |      |   |       |   |      |   |       |   |      |      |      |     |
| Underlying medical conditions (more than one may apply) |       |   |      |   |       |   |      |   |       |   |      |      |      |     |
| Chronic respiratory condition                           | 7204  | ( | 34.2 | ) | 6427  | ( | 89.2 | ) | 777   | ( | 10.8 | )    | 0.26 | Yes |
| Chronic non-respiratory condition                       | 12405 | ( | 58.9 | ) | 10914 | ( | 88.0 | ) | 1491  | ( | 12.0 | )    | 0.3  | Yes |
| Asthma                                                  | 1395  | ( | 6.6  | ) | 1263  | ( | 90.5 | ) | 132   | ( | 9.5  | )    | 0.13 | Yes |
| COPD                                                    | 3548  | ( | 16.8 | ) | 3358  | ( | 94.6 | ) | 190   | ( | 5.4  | )    | 0.4  | Yes |
| Other Chronic Lung Disease                              | 3818  | ( | 18.1 | ) | 3228  | ( | 84.5 | ) | 590   | ( | 15.5 | )    | 0.01 | No  |
| Heart Failure                                           | 3037  | ( | 14.4 | ) | 2851  | ( | 93.9 | ) | 186   | ( | 6.1  | )    | 0.33 | Yes |
| Ischemic Heart Disease                                  | 2965  | ( | 14.1 | ) | 2713  | ( | 91.5 | ) | 252   | ( | 8.5  | )    | 0.23 | Yes |
| Hypertension                                            | 7700  | ( | 36.6 | ) | 6888  | ( | 89.5 | ) | 812   | ( | 10.5 | )    | 0.29 | Yes |
| Other Heart Disease                                     | 5667  | ( | 26.9 | ) | 5158  | ( | 91.0 | ) | 509   | ( | 9.0  | )    | 0.32 | Yes |
| Stroke                                                  | 449   | ( | 2.1  | ) | 422   | ( | 94.0 | ) | 27    | ( | 6.0  | )    | 0.12 | Yes |
| Other CD                                                | 333   | ( | 1.6  | ) | 306   | ( | 91.9 | ) | 27    | ( | 8.1  | )    | 0.08 | No  |
| Type 1 Diabetes                                         | 95    | ( | 0.5  | ) | 87    | ( | 91.6 | ) | 8     | ( | 8.4  | )    | 0.04 | No  |
| Type 2 Diabetes                                         | 3974  | ( | 18.9 | ) | 3482  | ( | 87.6 | ) | 492   | ( | 12.4 | )    | 0.11 | Yes |
| Other Diabetes                                          | 53    | ( | 0.3  | ) | 48    | ( | 90.6 | ) | 5     | ( | 9.4  | )    | 0.03 | No  |
| Other Metabolic Disease (excluding diabetes)            | 5933  | ( | 28.2 | ) | 5282  | ( | 89.0 | ) | 651   | ( | 11.0 | )    | 0.22 | Yes |
| Clinical Obesity                                        | 2343  | ( | 11.1 | ) | 2011  | ( | 85.8 | ) | 332   | ( | 14.2 | )    | 0.03 | No  |
| Clinical Underweight                                    | 738   | ( | 3.5  | ) | 665   | ( | 90.1 | ) | 73    | ( | 9.9  | )    | 0.09 | No  |
| Renal Disease                                           | 3317  | ( | 15.7 | ) | 3037  | ( | 91.6 | ) | 280   | ( | 8.4  | )    | 0.25 | Yes |
| Liver                                                   | 846   | ( | 4.0  | ) | 769   | ( | 90.9 | ) | 77    | ( | 9.1  | )    | 0.11 | Yes |
| Blood                                                   | 740   | ( | 3.5  | ) | 656   | ( | 88.6 | ) | 84    | ( | 11.4 | )    | 0.06 | No  |

|                                             |      |   |           |   |      |   |           |   |      |   |           |   |      |     |
|---------------------------------------------|------|---|-----------|---|------|---|-----------|---|------|---|-----------|---|------|-----|
| Immunosuppression                           | 4147 | ( | 19.7      | ) | 3717 | ( | 89.6      | ) | 430  | ( | 10.4      | ) | 0.2  | Yes |
| Organ Transplant                            | 133  | ( | 0.6       | ) | 114  | ( | 85.7      | ) | 19   | ( | 14.3      | ) | 0.01 | No  |
| Cancer                                      | 1065 | ( | 5.1       | ) | 975  | ( | 91.5      | ) | 90   | ( | 8.5       | ) | 0.14 | Yes |
| Dementia                                    | 1034 | ( | 4.9       | ) | 944  | ( | 91.3      | ) | 90   | ( | 8.7       | ) | 0.13 | Yes |
| Other Neurological/Musculoskeletal Disorder | 3322 | ( | 15.8      | ) | 3048 | ( | 91.8      | ) | 274  | ( | 8.2       | ) | 0.26 | Yes |
| Down Syndrome                               | 4    | ( | 0.0       | ) | 4    | ( | 100.0     | ) | 0    | ( | 0.0       | ) | 0.02 | No  |
| Time Considerations (Median, Q1-Q3)         |      |   |           |   |      |   |           |   |      |   |           |   |      |     |
| Epi-curve (days)                            | 4/19 |   | 3/22-5/16 |   | 4/18 |   | 3/22-5/15 |   | 4/21 |   | 3/24-5/16 |   | 0.01 | Yes |
| 7-day Moving Average Percent Positivity (%) | 4.77 |   | 3.76-6.06 |   | 4.72 |   | 3.67-5.89 |   | 5.3  |   | 4.25-7.05 |   | 0.34 | Yes |

<sup>1</sup>Illustrates SMD prior to propensity weighting, to show differences between SARS-CoV-2 negative and positive groups.

<sup>2</sup>Variables with a SMD > 0.1 were included in PS weighting.

<sup>3</sup>Other race include: Asian, Hawaiian or Other Pacific islander, American Indian or Alaskan Native, Other not-listed and multi-race.

**Table S30. Quantiles of Inverse Propensity to be Vaccinated Weights used for ED/UC VE Estimates**

|                                                                                                                                     | <b>50%</b> | <b>Min</b> | <b>Max</b> | <b>1%</b> | <b>25%</b> | <b>75%</b> | <b>99%</b> | <b>99.90%</b> | <b>Number of Events<br/>Truncated to the<br/>99.9% Weight</b> |
|-------------------------------------------------------------------------------------------------------------------------------------|------------|------------|------------|-----------|------------|------------|------------|---------------|---------------------------------------------------------------|
| <u>mRNA VE among COVID-19 ED/UC medical events</u>                                                                                  |            |            |            |           |            |            |            |               |                                                               |
| VE both mRNA vaccines (aged $\geq 50$ years)                                                                                        | 1.648      | 1.017      | 21.369     | 1.072     | 1.382      | 2.225      | 4.865      | 8.515         | 22                                                            |
| <u>By vaccine product among COVID-19 medical events</u>                                                                             |            |            |            |           |            |            |            |               |                                                               |
| VE of BioNTech-Pfizer mRNA (aged $\geq 50$ years)                                                                                   | 1.445      | 1.008      | 27.957     | 1.036     | 1.223      | 1.996      | 6.421      | 13.306        | 18                                                            |
| VE of Moderna mRNA (aged $\geq 50$ years)                                                                                           | 1.426      | 1.013      | 19.984     | 1.040     | 1.198      | 1.954      | 6.939      | 13.453        | 16                                                            |
| Ad26.COV2.S (Johnson & Johnson)                                                                                                     | 1.038      | 1.003      | 95.733     | 1.003     | 1.005      | 1.076      | 16.684     | 42.097        | 13                                                            |
| <u>By Age Group among COVID-19 medical events</u>                                                                                   |            |            |            |           |            |            |            |               |                                                               |
| VE both mRNA vaccines (aged 50-64 years)                                                                                            | 1.628      | 1.042      | 16.233     | 1.080     | 1.353      | 2.052      | 5.099      | 8.636         | 8                                                             |
| VE both mRNA vaccines (aged 65-74 years)                                                                                            | 1.682      | 1.013      | 14.381     | 1.048     | 1.362      | 2.176      | 5.222      | 8.776         | 7                                                             |
| VE both mRNA vaccines (aged 75-84 years)                                                                                            | 1.506      | 1.017      | 17.077     | 1.062     | 1.287      | 2.133      | 5.780      | 8.185         | 6                                                             |
| VE both mRNA vaccines (aged $\geq 85$ years)                                                                                        | 1.558      | 1.040      | 10.813     | 1.099     | 1.341      | 2.115      | 4.631      | 7.998         | 3                                                             |
| <u>By Race and Ethnicity among COVID-19 medical events</u>                                                                          |            |            |            |           |            |            |            |               |                                                               |
| VE both mRNA vaccines among White adults aged $\geq 50$ years                                                                       | 1.637      | 1.029      | 17.815     | 1.083     | 1.375      | 2.239      | 4.878      | 7.711         | 18                                                            |
| VE both mRNA vaccines among Black adults aged $\geq 50$ years                                                                       | 1.383      | 1.048      | 14.063     | 1.069     | 1.194      | 1.715      | 6.027      | 11.497        | 1                                                             |
| VE both mRNA vaccines among Other or Unknown aged $\geq 50$ years                                                                   | 1.642      | 1.016      | 8.799      | 1.066     | 1.387      | 2.074      | 4.369      | 7.448         | 4                                                             |
| VE both mRNA vaccines among Hispanic adults aged $\geq 50$ years                                                                    | 1.474      | 1.032      | 9.025      | 1.062     | 1.282      | 1.926      | 5.683      | 8.579         | 2                                                             |
| VE both mRNA vaccines among Non-Hispanic adults aged $\geq 50$ years                                                                | 1.645      | 1.014      | 23.592     | 1.070     | 1.377      | 2.228      | 4.955      | 8.569         | 20                                                            |
| <u>By Presence of Absence of Underlying Chronic Medical Conditions Associated with Increased Risk of Severe Respiratory Disease</u> |            |            |            |           |            |            |            |               |                                                               |
| VE both mRNA vaccines among aged $\geq 50$ years with no chronic condition                                                          | 1.585      | 1.020      | 18.042     | 1.073     | 1.332      | 2.153      | 5.768      | 9.935         | 8                                                             |
| VE both mRNA vaccines among aged $\geq 50$ years with $\geq 1$ chronic <u>respiratory</u> condition                                 | 1.666      | 1.033      | 13.932     | 1.085     | 1.386      | 2.207      | 4.738      | 7.101         | 8                                                             |
| VE both mRNA vaccines among aged $\geq 50$ years with $\geq 1$ chronic <u>non-respiratory</u> condition                             | 1.667      | 1.033      | 15.301     | 1.083     | 1.403      | 2.233      | 4.597      | 6.846         | 13                                                            |
| <u>By Alternative Clinical Outcomes</u>                                                                                             |            |            |            |           |            |            |            |               |                                                               |

|                                                                                                        |       |       |        |       |       |       |       |       |    |
|--------------------------------------------------------------------------------------------------------|-------|-------|--------|-------|-------|-------|-------|-------|----|
| VE both mRNA vaccines among aged $\geq 50$ years with acute respiratory illness diagnosis              | 1.661 | 1.022 | 17.470 | 1.068 | 1.374 | 2.221 | 4.921 | 8.154 | 12 |
| VE both mRNA vaccines among aged $\geq 50$ years with clinical pneumonia diagnosis                     | 1.598 | 1.039 | 7.740  | 1.074 | 1.345 | 2.150 | 5.206 | 6.969 | 4  |
| VE both mRNA vaccines among aged $\geq 50$ years with CLI/signs and symptoms as primary discharge code | 1.626 | 1.018 | 14.132 | 1.075 | 1.357 | 2.170 | 4.986 | 8.125 | 12 |

## **2. ED/UC VE Sensitivity Analysis: Between Partner Heterogeneity**

In a sensitivity analysis examining potential heterogeneity in the VE estimates across partners, mRNA VE estimates among COVID-19 ED/UC encounters were similar (range=89%-97% for full vaccination, 77%-81% for partial 2-dose vaccination, and 60%-74% for partial 1-dose vaccination) (Table S17). Because only 3 partners contributed to ED/UC analyses,  $\chi^2$  (or Q-test) and  $I^2$  index were not calculated.

## **3. ED/UC VE Sensitivity Analysis: Alternative Clinical Outcomes**

In a sensitivity analysis to explore possible heterogeneity in VE by alternative clinical outcome, the mRNA VE among ED/UC encounters with clinical pneumonia diagnosis was 95% (95%CI=93%-97%) for full vaccination, 87% (95%CI=76%-93%) for partial 2-dose vaccination, and 76% (95%CI=64%-84%) for partial 1-dose vaccination. The mRNA VE among ED/UC encounters with CLI as the primary discharge code was 91% (95%CI=89%-93%) for full vaccination, 83% (95%CI=76%-88%) for partial 2-dose vaccination, and 68% (95%CI=60%-74%) for partial 1-dose vaccination (Table S19). As a whole, the mRNA VE estimates for both alternative clinical outcomes were similar and had overlapping confidence intervals relative to the main mRNA VE estimates among COVID-19 ED/UC encounters.

#### **4. ED/UC VE Sensitivity Analysis: Exclude Historical SARS-CoV-2 Positives**

In a sensitivity analysis excluding patients with any SARS-CoV-2 positive result from molecular or antigen assays >14 days prior to the index date, the mRNA VE among COVID-19 ED/UC encounters was 92% (95%CI=90%-93%) for full vaccination, 83% (95%CI=77%-87%) for partial 2-dose vaccination, and 68% (95%CI=61%-74%) for partial 1-dose vaccination (Table S25). These estimates were very similar to VE estimates in the main analysis (differences of  $\leq 3\%$  points).

## 5. ED/UC VE Sensitivity Analysis: Propensity of Clinical Testing for SARS-CoV-2

In a sensitivity analysis to examine potential bias introduced by clinician-ordered testing, IPW were calculated to account for both propensity to be vaccinated and propensity to be tested. The model for propensity for vaccination was built using only those who tested negative for SARS-CoV-2, while the model for propensity for testing was built with all the data. Among 71,866 CLI ED/UC encounters, 22,321 (31%) had available test results for SARS-CoV-2 across three partners (IH, KPNW, and RG; Table S26). Among ED/UC encounters, testing percentage varied by site ranging from 28% within RG to 41% within KPNW. Higher testing percentages were seen in encounters with chronic respiratory conditions (41%) or chronic non-respiratory conditions (36%), unvaccinated individuals (36% compared to 24-28% who received any of the COVID-19 vaccines), or those with CLI diagnosis code (41%).

The proportion of vaccination varied by partner, age, race, and ethnicity; this variation was similar among both those tested and those not tested for SARS-CoV-2 (Table S27).

The mRNA VE estimates among COVID-19 ED/UC encounters accounting for testing and vaccination were 91% (95%CI=88%-92%) for full vaccination, 83% (95%CI=76%-88%) for partial 2-dose vaccination, and 70% (95%CI=62%-75%) for partial 1-dose vaccination (Table S28). In comparison, the mRNA VE estimates in the main analysis were 91% (95%CI=89%-93%) for full vaccination, 80% (95%CI=73%-85%) for partial 2-dose vaccination, and 68% (95%CI=61%-74%) for partial 1-dose vaccination. The VE estimates using these different inverse propensity weights were similar to the results of the main analysis for full and partial 2-dose vaccination (difference  $\leq 3\%$  points) (Table S31).



**Table S31 . Unweighted and weighted standardized mean differences (SMD) for variables included in PS model1 for unvaccinated and mRNA vaccinees only - Emergency department and urgent care medical events**

|                                                         | Unvaccinated |   |         | Partially or Fully Vaccinated |   |         | Unweighted SMD <sup>2</sup> | Weighted SMD <sup>3</sup> |
|---------------------------------------------------------|--------------|---|---------|-------------------------------|---|---------|-----------------------------|---------------------------|
|                                                         | N            | ( | Row % ) | N                             | ( | Row % ) |                             |                           |
| <b>A. Emergency department and urgent care</b>          |              |   |         |                               |   |         |                             |                           |
| All emergency department and urgent care medical events | 8965         | ( | 50.2 )  | 8879                          | ( | 49.8 )  |                             |                           |
| Site Characteristics                                    |              |   |         |                               |   |         |                             |                           |
| Site-region                                             |              |   |         |                               |   |         |                             |                           |
| Intermountain Healthcare - site-region 1                | 202          | ( | 39.6 )  | 308                           | ( | 60.4 )  | 0.073                       | 0.006                     |
| Intermountain Healthcare - site-region 2                | 123          | ( | 44.7 )  | 152                           | ( | 55.3 )  | 0.028                       | 0.003                     |
| Intermountain Healthcare - site-region 3                | 1208         | ( | 43.3 )  | 1584                          | ( | 56.7 )  | 0.120                       | 0.007                     |
| Intermountain Healthcare - site-region 4                | 506          | ( | 44.0 )  | 644                           | ( | 56.0 )  | 0.066                       | 0.002                     |
| Intermountain Healthcare - site-region 5                | 121          | ( | 47.6 )  | 133                           | ( | 52.4 )  | 0.013                       | 0.002                     |
| Intermountain Healthcare - site-region 6                | 490          | ( | 51.5 )  | 461                           | ( | 48.5 )  | -0.012                      | -0.001                    |
| Intermountain Healthcare - site-region 7                | 120          | ( | 50.8 )  | 116                           | ( | 49.2 )  | -0.003                      | 0.005                     |
| Intermountain Healthcare - site-region 8                | 649          | ( | 52.8 )  | 580                           | ( | 47.2 )  | -0.028                      | -0.007                    |
| Kaiser Permanente Northwest - site-region 1             | 746          | ( | 38.7 )  | 1184                          | ( | 61.3 )  | 0.161                       | 0.014                     |
| Kaiser Permanente Northwest - site-region 2             | 790          | ( | 44.7 )  | 978                           | ( | 55.3 )  | 0.074                       | 0.002                     |
| Kaiser Permanente Northwest - site-region 3             | 210          | ( | 44.7 )  | 260                           | ( | 55.3 )  | 0.037                       | 0.002                     |
| Regenstrief Institute - site-region 1                   | 489          | ( | 70.2 )  | 208                           | ( | 29.8 )  | -0.161                      | -0.014                    |
| Regenstrief Institute - site-region 2                   | 228          | ( | 55.9 )  | 180                           | ( | 44.1 )  | -0.035                      | -0.007                    |
| Regenstrief Institute - site-region 3                   | 100          | ( | 64.9 )  | 54                            | ( | 35.1 )  | -0.055                      | -0.010                    |
| Regenstrief Institute - site-region 4                   | 407          | ( | 59.5 )  | 277                           | ( | 40.5 )  | -0.074                      | -0.008                    |
| Regenstrief Institute - site-region 5                   | 1116         | ( | 57.8 )  | 814                           | ( | 42.2 )  | -0.106                      | 0.003                     |
| Regenstrief Institute - site-region 6                   | 343          | ( | 65.7 )  | 179                           | ( | 34.3 )  | -0.107                      | -0.010                    |
| Regenstrief Institute - site-region 7                   | 100          | ( | 66.7 )  | 50                            | ( | 33.3 )  | -0.060                      | -0.006                    |
| Regenstrief Institute - site-region 8                   | 364          | ( | 63.6 )  | 208                           | ( | 36.4 )  | -0.098                      | 0.000                     |
| Regenstrief Institute - site-region 9                   | 186          | ( | 55.0 )  | 152                           | ( | 45.0 )  | -0.027                      | -0.001                    |
| Regenstrief Institute - site-region 10                  | 101          | ( | 56.4 )  | 78                            | ( | 43.6 )  | -0.025                      | -0.003                    |
| Regenstrief Institute - site-region Missing             | 366          | ( | 56.7 )  | 279                           | ( | 43.3 )  | -0.050                      | -0.003                    |
| Patient Characteristics                                 |              |   |         |                               |   |         |                             |                           |
| Sex                                                     |              |   |         |                               |   |         |                             |                           |
| Female                                                  | 4895         | ( | 49.6 )  | 4967                          | ( | 50.4 )  |                             |                           |
| Male                                                    | 4070         | ( | 51.0 )  | 3912                          | ( | 49.0 )  |                             |                           |

|                                                         |       |   |      |   |       |   |      |   |        |        |
|---------------------------------------------------------|-------|---|------|---|-------|---|------|---|--------|--------|
| Race                                                    |       |   |      |   |       |   |      |   |        |        |
| White                                                   | 7176  | ( | 48.7 | ) | 7562  | ( | 51.3 | ) | 0.135  | 0.014  |
| Black                                                   | 438   | ( | 68.3 | ) | 203   | ( | 31.7 | ) | -0.140 | -0.009 |
| Other <sup>4</sup>                                      | 292   | ( | 47.9 | ) | 317   | ( | 52.1 | ) | 0.017  | 0.002  |
| Unknown                                                 | 1059  | ( | 57.1 | ) | 797   | ( | 42.9 | ) | -0.093 | -0.013 |
| Ethnicity                                               |       |   |      |   |       |   |      |   |        |        |
| Hispanic/Latinx Ethnicity                               | 7494  | ( | 49.2 | ) | 7753  | ( | 50.8 | ) | 0.106  | 0.014  |
| Not Hispanic/Latinx Ethnicity                           | 477   | ( | 56.0 | ) | 375   | ( | 44.0 | ) | -0.051 | -0.010 |
| Unknown                                                 | 994   | ( | 57.0 | ) | 751   | ( | 43.0 | ) | -0.089 | -0.010 |
| Age, continuous (mean, std)                             | 68.55 | ( | 11.5 | ) | 72.56 | ( | 11.0 | ) | 0.352  | 0.018  |
| Setting Characteristics                                 |       |   |      |   |       |   |      |   |        |        |
| Urban-Rural Classification of Facility                  |       |   |      |   |       |   |      |   |        |        |
| Large Central Metro/Large Fringe Metro                  | 3928  | ( | 48.7 | ) | 4144  | ( | 51.3 | ) | 0.057  | 0.008  |
| Medium Metro/Small Metro                                | 3545  | ( | 50.3 | ) | 3500  | ( | 49.7 | ) | -0.003 | -0.003 |
| Micropolitan/Non-Core                                   | 985   | ( | 56.4 | ) | 761   | ( | 43.6 | ) | -0.081 | -0.003 |
| Unknown                                                 | 507   | ( | 51.7 | ) | 474   | ( | 48.3 | ) | -0.014 | -0.005 |
| Underlying medical conditions (more than one may apply) |       |   |      |   |       |   |      |   |        |        |
| Chronic respiratory condition                           | 3155  | ( | 49.1 | ) | 3272  | ( | 50.9 | ) | 0.035  | -0.003 |
| Chronic non-respiratory condition                       | 5190  | ( | 47.6 | ) | 5724  | ( | 52.4 | ) | 0.135  | -0.001 |
| Asthma                                                  | 557   | ( | 44.1 | ) | 706   | ( | 55.9 | ) | 0.068  | 0.005  |
| COPD                                                    | 1811  | ( | 53.9 | ) | 1547  | ( | 46.1 | ) | -0.071 | -0.017 |
| Other Chronic Lung Disease                              | 1420  | ( | 44.0 | ) | 1808  | ( | 56.0 | ) |        |        |
| Heart Failure                                           | 1362  | ( | 47.8 | ) | 1489  | ( | 52.2 | ) | 0.043  | -0.004 |
| Ischemic Heart Disease                                  | 1246  | ( | 45.9 | ) | 1467  | ( | 54.1 | ) | 0.073  | -0.004 |
| Hypertension                                            | 3176  | ( | 46.1 | ) | 3712  | ( | 53.9 | ) | 0.131  | 0.007  |
| Other Heart Disease                                     | 2381  | ( | 46.2 | ) | 2777  | ( | 53.8 | ) | 0.104  | 0.004  |
| Stroke                                                  | 186   | ( | 44.1 | ) | 236   | ( | 55.9 | ) | 0.038  | 0.000  |
| Other CD                                                | 141   | ( | 46.1 | ) | 165   | ( | 53.9 | ) |        |        |
| Type 1 Diabetes                                         | 27    | ( | 31.0 | ) | 60    | ( | 69.0 | ) |        |        |
| Type 2 Diabetes                                         | 1616  | ( | 46.4 | ) | 1866  | ( | 53.6 | ) | 0.075  | 0.010  |
| Other Diabetes                                          | 20    | ( | 41.7 | ) | 28    | ( | 58.3 | ) |        |        |
| Other Metabolic Disease (excluding diabetes)            | 2369  | ( | 44.9 | ) | 2913  | ( | 55.1 | ) | 0.140  | 0.017  |
| Clinical Obesity                                        | 917   | ( | 45.6 | ) | 1094  | ( | 54.4 | ) |        |        |
| Clinical Underweight                                    | 349   | ( | 52.5 | ) | 316   | ( | 47.5 | ) |        |        |
| Renal Disease                                           | 1304  | ( | 42.9 | ) | 1733  | ( | 57.1 | ) | 0.132  | 0.016  |

|                                                |      |   |           |   |      |   |           |   |        |        |
|------------------------------------------------|------|---|-----------|---|------|---|-----------|---|--------|--------|
| Liver                                          | 395  | ( | 51.4      | ) | 374  | ( | 48.6      | ) | -0.010 | -0.008 |
| Blood                                          | 272  | ( | 41.5      | ) | 384  | ( | 58.5      | ) |        |        |
| Immunosuppression                              | 1655 | ( | 44.5      | ) | 2062 | ( | 55.5      | ) | 0.117  | 0.016  |
| Organ Transplant                               | 52   | ( | 45.6      | ) | 62   | ( | 54.4      | ) |        |        |
| Cancer                                         | 466  | ( | 47.8      | ) | 509  | ( | 52.2      | ) | 0.024  | -0.004 |
| Dementia                                       | 382  | ( | 40.5      | ) | 562  | ( | 59.5      | ) | 0.092  | 0.009  |
| Other Neurological/Musculoskeletal Disorder    | 1406 | ( | 46.1      | ) | 1642 | ( | 53.9      | ) | 0.075  | -0.004 |
| Down Syndrome                                  | 2    | ( | 50.0      | ) | 2    | ( | 50.0      | ) |        |        |
| Time Considerations (Median, Q1-Q3)            |      |   |           |   |      |   |           |   |        |        |
| Epi-curve (days)                               | 4/09 |   | 3/12-5/10 |   | 4/24 |   | 3/30-5/18 |   | 0.359  | 0.044  |
| 7-day Moving Average Percent Positivity (days) | 4.85 |   | 3.74-6.26 |   | 4.56 |   | 3.65-5.58 |   | -0.238 | -0.035 |

<sup>1</sup>Variables with a SMD > 0.1 in the pooled mRNA and J and J sample were included in PS weighting.

<sup>2</sup>Illustrates SMD prior to propensity weighting, to show differences between vaccinated and unvaccinated groups.

<sup>3</sup>SMD values after propensity weighting, SMD < 0.2 indicates no differences between groups, and that balance was achieved. Variables where balance was not achieved were included directly as covariates in the VE models.

<sup>4</sup>Other race include: Asian, Hawaiian or Other Pacific islander, American Indian or Alaskan Native, Other not-listed and multi-race.

## **F. Johnson & Johnson COVID-19 Vaccine Effectiveness**

### **1. Adaptation of methods for product specific VE analysis**

Due to the later date of FDA emergency use authorization for the Ad26.COV2.S (Janssen/Johnson & Johnson) [J&J] vaccine and the smaller numbers of patients who received this vaccine during the study period, the methods for the product-specific VE analysis was changed from the primary methods in four ways: (1) study start date began on the index date of first fully vaccinated J&J recipient for each respective partner, (2) any partner with fewer than five J&J vaccine recipients at the time of final data collection were excluded from the analysis, (3) site-regions were collapsed so that each site-region contained at least five J&J vaccine recipients, and (4) rather than examine underlying medical conditions as multiple separate conditions, two dichotomous variables (respiratory chronic conditions and non-respiratory chronic conditions) were examined.

With these changes, two sites were excluded from the hospitalization VE analysis: HP (only 2 J&J vaccine recipients) and UCO (no J&J vaccine recipients). No sites were excluded from the ED/UC encounter analysis. For RG, 10 site-regions were collapsed to 5 site-regions in this VE analysis. For IH, 8 site-regions were collapsed to 6 site-regions. KPNW was examined as a single site-region.

Instead of the vaccine eligibility dates listed in Table 1, the vaccine eligibility dates for the J&J VE analysis were as follows:

Hospitalizations

CUIMC: 03/27

IH: 03/25

KPNC: 03/25

KPNW: 03/25

RG: 03/22

ED/UC encounters

IH: 03/19

KPNW: 03/19

RG: 03/19

A total of 11,468 hospitalizations (Table S16) and 8,917 ED/UC encounters (Table S19) were included in the J&J VE analyses. Among hospitalizations, 707 (6%) were fully J&J vaccinated, compared to 456 (5%) of ED/UC encounters.

## **2. Variables included in inverse propensity to be vaccinated weights**

In examining the association with COVID-19 infection status, the variables that had a SMD of  $>0.1$ , and thus were potential confounders included in the inverse-propensity-to-be-vaccinated weights, were site-region, race, ethnicity, age, urban-rural classification of the facility, underlying conditions, and 7-day moving average percent positivity (data not shown). Of these variables, site-region, race, ethnicity, age, urban-rural classification of the facility, epidemiologic days, and 7-day moving average percent positivity were also unbalanced by vaccination status (SMD of  $>0.1$  in a bivariate association with vaccination before their inclusion in the propensity to be vaccinated weights) (Table S32 and Table S33). After inverse-propensity-to-be-vaccinated weighting, all variables were balanced across the vaccinated and unvaccinated groups (all with SMD  $<0.2$ ). Calendar time was included in the multivariate logistic regression analysis for both hospitalizations and ED/UC encounters analyses.

Table S32. Unweighted and weighted standardized mean differences (SMD) for variables included in PS model<sup>1</sup> for unvaccinated and J&J vaccinees only - Hospitalization events

|                                                       | Unvaccinated |           | Fully Vaccinated |           | Unweighted<br>SMD <sup>2</sup> | Weighted<br>SMD <sup>3</sup> |
|-------------------------------------------------------|--------------|-----------|------------------|-----------|--------------------------------|------------------------------|
|                                                       | N            | ( Row % ) | N                | ( Row % ) |                                |                              |
| <b>A. Hospitalizations</b>                            |              |           |                  |           |                                |                              |
| All Hospitalization events                            | 8755         | ( 92.8 )  | 677              | ( 7.2 )   |                                |                              |
| Site Characteristics                                  |              |           |                  |           |                                |                              |
| Site-region                                           |              |           |                  |           |                                |                              |
| Columbia University - site-region 1                   | 964          | ( 96.3 )  | 37               | ( 3.7 )   | -0.18                          | 0.015                        |
| Intermountain Healthcare - site-region 1              | 69           | ( 89.6 )  | 8                | ( 10.4 )  | 0.044                          | -0.005                       |
| Intermountain Healthcare - site-regions 2, 3          | 372          | ( 92.5 )  | 30               | ( 7.5 )   | 0.009                          | 0.025                        |
| Intermountain Healthcare - site-region 4              | 177          | ( 96.7 )  | 6                | ( 3.3 )   | -0.082                         | -0.043                       |
| Intermountain Healthcare - site-region 5              | 19           | ( 95.0 )  | 1                | ( 5.0 )   | -0.015                         | -0.026                       |
| Intermountain Healthcare - site-region 6              | 127          | ( 91.4 )  | 12               | ( 8.6 )   | 0.027                          | 0.003                        |
| Intermountain Healthcare - site-regions 7, 8          | 151          | ( 85.3 )  | 26               | ( 14.7 )  | 0.156                          | 0.016                        |
| Kaiser Permanente Northern California - site-region 1 | 166          | ( 90.7 )  | 17               | ( 9.3 )   | 0.045                          | 0.02                         |
| Kaiser Permanente Northern California - site-region 2 | 136          | ( 94.4 )  | 8                | ( 5.6 )   | -0.03                          | -0.018                       |
| Kaiser Permanente Northern California - site-region 3 | 696          | ( 92.1 )  | 60               | ( 7.9 )   | 0.034                          | 0.019                        |
| Kaiser Permanente Northern California - site-region 4 | 943          | ( 83.8 )  | 182              | ( 16.2 )  | 0.497                          | 0.047                        |
| Kaiser Permanente Northern California - site-region 5 | 253          | ( 80.1 )  | 63               | ( 19.9 )  | 0.357                          | -0.001                       |
| Kaiser Permanente Northern California - site-region 6 | 95           | ( 81.9 )  | 21               | ( 18.1 )  | 0.183                          | 0.017                        |
| Kaiser Permanente Northern California - site-region 7 | 66           | ( 94.3 )  | 4                | ( 5.7 )   | -0.019                         | -0.016                       |
| Kaiser Permanente Northern California - site-region 8 | 224          | ( 90.0 )  | 25               | ( 10.0 )  | 0.071                          | 0.011                        |
| Kaiser Permanente Northwest - site-region 1           | 350          | ( 88.6 )  | 45               | ( 11.4 )  | 0.132                          | 0.016                        |
| Kaiser Permanente Northwest - site-region 2           | 64           | ( 92.8 )  | 5                | ( 7.2 )   | 0.001                          | 0.004                        |
| Kaiser Permanente Northwest - site-region 3, 4, 5     | 43           | ( 97.7 )  | 1                | ( 2.3 )   | -0.05                          | -0.034                       |
| Regenstrief Institute - site-regions 1,2,3            | 1219         | ( 97.1 )  | 36               | ( 2.9 )   | -0.253                         | 0.013                        |
| Regenstrief Institute - site-region 4                 | 247          | ( 96.9 )  | 8                | ( 3.1 )   | -0.101                         | -0.02                        |
| Regenstrief Institute - site-region 5                 | 1072         | ( 96.4 )  | 40               | ( 3.6 )   | -0.196                         | 0.031                        |
| Regenstrief Institute - site-regions 6,9              | 515          | ( 96.3 )  | 20               | ( 3.7 )   | -0.127                         | -0.064                       |
| Regenstrief Institute - site-regions 7,8,10           | 344          | ( 98.3 )  | 6                | ( 1.7 )   | -0.161                         | -0.068                       |
| Regenstrief Institute - site-region missing           | 301          | ( 97.4 )  | 8                | ( 2.6 )   | -0.127                         | -0.07                        |
| Patient Characteristics                               |              |           |                  |           |                                |                              |
| Sex                                                   |              |           |                  |           | -                              | -                            |
| Female                                                | 4665         | ( 92.7 )  | 369              | ( 7.3 )   |                                |                              |
| Male                                                  | 4090         | ( 93.0 )  | 308              | ( 7.0 )   |                                |                              |

|                                                         |       |   |           |   |       |   |           |   |        |        |
|---------------------------------------------------------|-------|---|-----------|---|-------|---|-----------|---|--------|--------|
| Race                                                    |       |   |           |   |       |   |           |   |        |        |
| White                                                   | 5648  | ( | 92.9      | ) | 434   | ( | 7.1       | ) | -0.008 | -0.036 |
| Black                                                   | 1157  | ( | 93.5      | ) | 81    | ( | 6.5       | ) | -0.037 | 0.089  |
| Other <sup>4</sup>                                      | 483   | ( | 86.4      | ) | 76    | ( | 13.6      | ) | 0.242  | 0.04   |
| Unknown                                                 | 1467  | ( | 94.5      | ) | 86    | ( | 5.5       | ) | -0.109 | -0.059 |
| Ethnicity                                               |       |   |           |   |       |   |           |   |        |        |
| Hispanic/Latinx Ethnicity                               | 987   | ( | 92.4      | ) | 81    | ( | 7.6       | ) | -0.134 | 0.027  |
| Not Hispanic/Latinx Ethnicity                           | 6236  | ( | 93.4      | ) | 441   | ( | 6.6       | ) | 0.022  | -0.032 |
| Unknown                                                 | 1532  | ( | 90.8      | ) | 155   | ( | 9.2       | ) | 0.141  | -0.006 |
| Age, continuous (mean, std)                             | 69.99 | ( | 50.1      | ) | 69.61 | ( | 49.9      | ) | -0.033 | -0.04  |
| Setting Characteristics                                 |       |   |           |   |       |   |           |   |        |        |
| Urban-Rural Classification of Facility                  |       |   |           |   |       |   |           |   |        |        |
| Large Central Metro/Large Fringe Metro                  | 5985  | ( | 92.2      | ) | 505   | ( | 7.8       | ) | 0.135  | 0.103  |
| Medium Metro/Small Metro                                | 2292  | ( | 93.7      | ) | 154   | ( | 6.3       | ) | -0.078 | -0.083 |
| Micropolitan/Non-Core                                   | 162   | ( | 95.3      | ) | 8     | ( | 4.7       | ) | -0.05  | 0.011  |
| Unknown                                                 | 316   | ( | 96.9      | ) | 10    | ( | 3.1       | ) | -0.117 | -0.068 |
| Underlying medical conditions (more than one may apply) |       |   |           |   |       |   |           |   |        |        |
| Chronic respiratory condition                           | 5606  | ( | 92.4      | ) | 460   | ( | 7.6       | ) | 0.082  | -0.005 |
| Chronic non-respiratory condition                       | 7708  | ( | 92.3      | ) | 645   | ( | 7.7       | ) | 0.227  | 0.079  |
| Time Considerations (Median, Q1-Q3)                     |       |   |           |   |       |   |           |   |        |        |
| Epi-curve (days)                                        | 4/28  |   | 4/11-5/19 |   | 05/10 |   | 4/25-5/28 |   | 0.457  | 0.133  |
| 7-day Moving Average Percent Positivity (%)             | 4.26  |   | 2.4-5.7   |   | 2.3   |   | 1.1-4.6   |   | -0.543 | -0.035 |

<sup>1</sup>Variables with a SMD > 0.1 in the pooled mRNA and J and J sample were included in PS weighting.

<sup>2</sup>Illustrates SMD prior to propensity weighting, to show differences between vaccinated and unvaccinated groups.

<sup>3</sup>SMD values after propensity weighting, SMD < 0.2 indicates no differences between groups, and that balance was achieved. Variables where balance was not achieved were included directly as covariates in the VE models.

<sup>4</sup>Other race include: Asian, Hawaiian or Other Pacific islander, American Indian or Alaskan Native, Other not-listed and multi-race.



**Table S33. Unweighted and weighted standardized mean differences (SMD) for variables included in PS model<sup>1</sup> for unvaccinated and J&J vaccinees only - Emergency department and urgent care medical events**

|                                                         | Unvaccinated |           | Fully Vaccinated |           | Unweighted<br>SMD <sup>2</sup> | Weighted<br>SMD <sup>3</sup> |
|---------------------------------------------------------|--------------|-----------|------------------|-----------|--------------------------------|------------------------------|
|                                                         | N            | ( Row % ) | N                | ( Row % ) |                                |                              |
| <b>A. Emergency department and urgent care</b>          |              |           |                  |           |                                |                              |
| All emergency department and urgent care medical events | 6261         | ( 93.6 )  | 427              | ( 6.4 )   |                                |                              |
| Site Characteristics                                    |              |           |                  |           |                                |                              |
| Site-region                                             |              |           |                  |           |                                |                              |
| Intermountain Healthcare - site-region 1                | 161          | ( 93.1 )  | 12               | ( 6.9 )   | 0.015                          | -0.012                       |
| Intermountain Healthcare - site-region 2                | 991          | ( 93.0 )  | 75               | ( 7.0 )   | 0.047                          | 0.034                        |
| Intermountain Healthcare - site-region 4                | 366          | ( 95.8 )  | 16               | ( 4.2 )   | -0.090                         | 0.000                        |
| Intermountain Healthcare - site-region 5                | 82           | ( 91.1 )  | 8                | ( 8.9 )   | 0.049                          | 0.017                        |
| Intermountain Healthcare - site-region 6                | 377          | ( 92.2 )  | 32               | ( 7.8 )   | 0.061                          | 0.001                        |
| Intermountain Healthcare - site-region 7                | 502          | ( 89.3 )  | 60               | ( 10.7 )  | 0.217                          | 0.032                        |
| Kaiser Permanente Northwest - site-region 1             | 579          | ( 88.7 )  | 74               | ( 11.3 )  | 0.272                          | 0.016                        |
| Kaiser Permanente Northwest - site-region 2             | 398          | ( 93.9 )  | 26               | ( 6.1 )   | -0.011                         | 0.027                        |
| Kaiser Permanente Northwest - site-region 3             | 166          | ( 94.9 )  | 9                | ( 5.1 )   | -0.034                         | -0.004                       |
| Regenstrief Institute - site-region 1                   | 594          | ( 96.4 )  | 22               | ( 3.6 )   | -0.150                         | -0.039                       |
| Regenstrief Institute - site-region 4                   | 269          | ( 96.1 )  | 11               | ( 3.9 )   | -0.086                         | 0.015                        |
| Regenstrief Institute - site-region 5                   | 784          | ( 95.4 )  | 38               | ( 4.6 )   | -0.110                         | 0.027                        |
| Regenstrief Institute - site-region 6                   | 370          | ( 96.4 )  | 14               | ( 3.6 )   | -0.113                         | -0.088                       |
| Regenstrief Institute - site-region 7                   | 350          | ( 96.7 )  | 12               | ( 3.3 )   | -0.123                         | -0.040                       |
| Regenstrief Institute - site-region missing             | 272          | ( 93.8 )  | 18               | ( 6.2 )   | -0.006                         | -0.015                       |
| Patient Characteristics                                 |              |           |                  |           |                                |                              |
| Sex                                                     |              |           |                  |           |                                |                              |
| Female                                                  | 3417         | ( 93.4 )  | 241              | ( 6.6 )   |                                |                              |
| Male                                                    | 2844         | ( 93.9 )  | 186              | ( 6.1 )   |                                |                              |
| Race                                                    |              |           |                  |           |                                |                              |
| White                                                   | 4902         | ( 93.3 )  | 351              | ( 6.7 )   | 0.095                          | 0.039                        |
| Black                                                   | 348          | ( 96.1 )  | 14               | ( 3.9 )   | -0.101                         | -0.020                       |
| Other <sup>4</sup>                                      | 223          | ( 93.3 )  | 16               | ( 6.7 )   | 0.010                          | -0.049                       |
| Unknown                                                 | 788          | ( 94.5 )  | 46               | ( 5.5 )   | -0.055                         | -0.007                       |
| Ethnicity                                               |              |           |                  |           |                                |                              |
| Hispanic/Latinx Ethnicity                               | 5151         | ( 93.5 )  | 359              | ( 6.5 )   | 0.047                          | 0.001                        |

|                                                         |       |   |           |   |       |   |           |   |        |        |
|---------------------------------------------------------|-------|---|-----------|---|-------|---|-----------|---|--------|--------|
| Not Hispanic/Latinx Ethnicity                           | 377   | ( | 93.8      | ) | 25    | ( | 6.2       | ) | -0.007 | 0.003  |
| Unknown                                                 | 733   | ( | 94.5      | ) | 43    | ( | 5.5       | ) | -0.051 | -0.003 |
| Age, continuous (mean, std)                             | 65.44 | ( | 11.1      | ) | 65.81 | ( | 10.7      | ) | 0.033  | -0.021 |
| Setting Characteristics                                 |       |   |           |   |       |   |           |   |        |        |
| Urban-Rural Classification of Facility                  |       |   |           |   |       |   |           |   |        |        |
| Large Central Metro/Large Fringe Metro                  | 2802  | ( | 93.5      | ) | 194   | ( | 6.5       | ) | 0.014  | 0.001  |
| Medium Metro/Small Metro                                | 2428  | ( | 93.8      | ) | 160   | ( | 6.2       | ) | -0.027 | -0.010 |
| Micropolitan/Non-Core                                   | 646   | ( | 93.8      | ) | 43    | ( | 6.2       | ) | -0.008 | 0.020  |
| Unknown                                                 | 385   | ( | 92.8      | ) | 30    | ( | 7.2       | ) | 0.036  | -0.008 |
| Underlying medical conditions (more than one may apply) |       |   |           |   |       |   |           |   |        |        |
| Chronic respiratory condition                           | 2155  | ( | 92.6      | ) | 171   | ( | 7.4       | ) | 0.118  | 0.035  |
| Chronic non-respiratory condition                       | 3419  | ( | 93.4      | ) | 243   | ( | 6.6       | ) | 0.046  | -0.011 |
| Time Considerations (Median, Q1-Q3)                     |       |   |           |   |       |   |           |   |        |        |
| Epi-curve (days)                                        | 4/28  |   | 4/7-5/19  |   | 5/09  |   | 4/22-5/26 |   | 0.390  | 0.059  |
| 7-day Moving Average Percent Positivity (%)             | 4.74  |   | 3.78-5.73 |   | 4.73  |   | 3.73-5.69 |   | -0.090 | -0.029 |

<sup>1</sup>Variables with a SMD > 0.1 in the pooled mRNA and J and J sample were included in PS weighting.

<sup>2</sup>Illustrates SMD prior to propensity weighting, to show differences between vaccinated and unvaccinated groups.

<sup>3</sup>SMD values after propensity weighting, SMD < 0.2 indicates no differences between groups, and that balance was achieved. Variables where balance was not achieved were included directly as covariates in the VE models.

<sup>4</sup>Other race include: Asian, Hawaiian or Other Pacific islander, American Indian or Alaskan Native, Other not-listed and multi-race.

## **G. COVID-19 VE Sensitivity Analysis: Propensity Score Estimation Using All Observations**

Because the test-negative design has been interpreted as an indirect cohort and because COVID-19 is not currently a rare outcome, we also estimated propensity-for-vaccination scores using all study observations. In this sensitivity analysis, we conducted analyses using the same methods as described in the statistical analysis plan (Section C), with the exception that instead of using only the control group to estimate propensity scores, the entire study group was included to estimate propensity scores. Therefore, propensity scores for controls were not ascribed to cases as in the original study design. Balance among vaccinated and unvaccinated groups was achieved across all models for both ED/UC and hospitalization cohorts (Tables S34-37). Results show minimal differences in overall VE estimates for hospitalization, ICU, and ED/UC with this approach (Figures S21-23) compared to the main analysis (Figures 2-3). Minimal differences in VE estimates were also seen by race, ethnicity, age groups, and chronic conditions in the ED/UC (Figure S23 vs Figure 3) as well as the hospitalization cohort (Figure S22 vs Figure 2). Of note, a difference of 8% in VE estimates for the Johnson and Johnson vaccine was revealed for ED/UC, while a difference of 4% is shown for hospitalizations. Moderna and Pfizer VE estimates differed minimally.

Table S34. Unweighted and weighted standardized mean differences (SMD) for variables included in PS model<sup>1</sup> for mRNA-specific VE estimates - Hospitalizations events

|                                                       | Sample<br>N | Unvaccinated<br>N<br>( Row % ) | Partially or Fully Vaccinated<br>N<br>( Row % ) | Unweighted<br>SMD <sup>2</sup> | Weighted<br>SMD <sup>3</sup> |
|-------------------------------------------------------|-------------|--------------------------------|-------------------------------------------------|--------------------------------|------------------------------|
| <b>A. Hospitalizations</b>                            |             |                                |                                                 |                                |                              |
| All hospitalizations                                  | 40845       | 20406 ( 50 )                   | 20439 ( 50 )                                    | -                              | -                            |
| Site Characteristics                                  |             |                                |                                                 |                                |                              |
| Site-region                                           |             |                                |                                                 |                                |                              |
| Columbia - site-region 1                              | 3088        | 2181 ( 71 )                    | 907 ( 29 )                                      | 0.24                           | -0.01                        |
| HealthPartners - site-region 1                        | 965         | 381 ( 39 )                     | 584 ( 61 )                                      | 0.07                           | 0.01                         |
| HealthPartners - site-region 2                        | 16          | 8 ( 50 )                       | 8 ( 50 )                                        | <0.001                         | 0.00                         |
| Intermountain Healthcare - site-region 1              | 239         | 133 ( 56 )                     | 106 ( 44 )                                      | 0.02                           | 0.00                         |
| Intermountain Healthcare - site-region 2              | 234         | 101 ( 43 )                     | 133 ( 57 )                                      | 0.02                           | 0.00                         |
| Intermountain Healthcare - site-region 3              | 1406        | 654 ( 47 )                     | 752 ( 53 )                                      | 0.03                           | 0.00                         |
| Intermountain Healthcare - site-region 4              | 715         | 340 ( 48 )                     | 375 ( 52 )                                      | 0.01                           | 0.00                         |
| Intermountain Healthcare - site-region 5              | 66          | 34 ( 52 )                      | 32 ( 48 )                                       | 0.00                           | 0.00                         |
| Intermountain Healthcare - site-region 6              | 467         | 245 ( 52 )                     | 222 ( 48 )                                      | 0.01                           | 0.00                         |
| Intermountain Healthcare - site-region 7              | 73          | 37 ( 51 )                      | 36 ( 49 )                                       | 0.00                           | -0.01                        |
| Intermountain Healthcare - site-region 8              | 623         | 373 ( 60 )                     | 250 ( 40 )                                      | 0.05                           | 0.00                         |
| Kaiser Permanente Northern California - site-region 1 | 687         | 223 ( 32 )                     | 464 ( 68 )                                      | 0.09                           | 0.00                         |
| Kaiser Permanente Northern California - site-region 2 | 502         | 211 ( 42 )                     | 291 ( 58 )                                      | 0.04                           | 0.01                         |
| Kaiser Permanente Northern California - site-region 3 | 3139        | 997 ( 32 )                     | 2142 ( 68 )                                     | 0.21                           | 0.01                         |
| Kaiser Permanente Northern California - site-region 4 | 5474        | 1262 ( 23 )                    | 4212 ( 77 )                                     | 0.43                           | 0.01                         |
| Kaiser Permanente Northern California - site-region 5 | 1596        | 338 ( 21 )                     | 1258 ( 79 )                                     | 0.23                           | 0.01                         |
| Kaiser Permanente Northern California - site-region 6 | 655         | 123 ( 19 )                     | 532 ( 81 )                                      | 0.16                           | 0.00                         |
| Kaiser Permanente Northern California - site-region 7 | 262         | 91 ( 35 )                      | 171 ( 65 )                                      | 0.05                           | 0.00                         |
| Kaiser Permanente Northern California - site-region 8 | 1119        | 314 ( 28 )                     | 805 ( 72 )                                      | 0.15                           | -0.01                        |
| Kaiser Permanente Northwest - site-region 1           | 1330        | 624 ( 47 )                     | 706 ( 53 )                                      | 0.02                           | 0.00                         |
| Kaiser Permanente Northwest - site-region 2           | 388         | 204 ( 53 )                     | 184 ( 47 )                                      | 0.01                           | -0.01                        |
| Kaiser Permanente Northwest - site-region 3           | 181         | 78 ( 43 )                      | 103 ( 57 )                                      | 0.02                           | 0.00                         |

|                                             |      |      |        |      |        |      |       |
|---------------------------------------------|------|------|--------|------|--------|------|-------|
| Regenstrief Institute - site-region 1       | 2767 | 1966 | ( 71 ) | 801  | ( 29 ) | 0.23 | 0.00  |
| Regenstrief Institute - site-region 2       | 557  | 317  | ( 57 ) | 240  | ( 43 ) | 0.03 | 0.00  |
| Regenstrief Institute - site-region 3       | 170  | 116  | ( 68 ) | 54   | ( 32 ) | 0.05 | 0.00  |
| Regenstrief Institute - site-region 4       | 925  | 577  | ( 62 ) | 348  | ( 38 ) | 0.08 | 0.00  |
| Regenstrief Institute - site-region 5       | 3708 | 2181 | ( 59 ) | 1527 | ( 41 ) | 0.11 | 0.00  |
| Regenstrief Institute - site-region 6       | 1143 | 681  | ( 60 ) | 462  | ( 40 ) | 0.07 | 0.00  |
| Regenstrief Institute - site-region 7       | 112  | 64   | ( 57 ) | 48   | ( 43 ) | 0.02 | 0.00  |
| Regenstrief Institute - site-region 8       | 853  | 513  | ( 60 ) | 340  | ( 40 ) | 0.06 | -0.01 |
| Regenstrief Institute - site-region 9       | 765  | 371  | ( 48 ) | 394  | ( 52 ) | 0.01 | -0.01 |
| Regenstrief Institute - site-region 10      | 269  | 142  | ( 53 ) | 127  | ( 47 ) | 0.01 | -0.01 |
| Regenstrief Institute - site-region missing | 1037 | 665  | ( 64 ) | 372  | ( 36 ) | 0.09 | 0.01  |
| University of Colorado - site-region 1      | 1585 | 1153 | ( 73 ) | 432  | ( 27 ) | 0.18 | 0.00  |
| University of Colorado - site-region 2      | 1927 | 1239 | ( 64 ) | 688  | ( 36 ) | 0.13 | 0.00  |
| University of Colorado - site-region 3      | 1802 | 1469 | ( 82 ) | 333  | ( 18 ) | 0.27 | 0.00  |

## Patient Characteristics

## Sex

|        |       |       |        |       |        |   |   |
|--------|-------|-------|--------|-------|--------|---|---|
| Male   | 19263 | 9695  | ( 50 ) | 9568  | ( 50 ) | - | - |
| Female | 21581 | 10710 | ( 50 ) | 10871 | ( 50 ) | - | - |

## Race

|                    |       |       |        |       |        |      |       |
|--------------------|-------|-------|--------|-------|--------|------|-------|
| White              | 28566 | 13886 | ( 49 ) | 14680 | ( 51 ) | 0.08 | 0.01  |
| Black              | 3817  | 2393  | ( 63 ) | 1424  | ( 37 ) | 0.16 | -0.01 |
| Other <sup>4</sup> | 2815  | 913   | ( 32 ) | 1902  | ( 68 ) | 0.19 | 0.01  |
| Unknown            | 5647  | 3214  | ( 57 ) | 2433  | ( 43 ) | 0.11 | -0.01 |

## Ethnicity

|                               |       |       |        |       |        |      |      |
|-------------------------------|-------|-------|--------|-------|--------|------|------|
| Hispanic/Latinx Ethnicity     | 4487  | 2376  | ( 53 ) | 2111  | ( 47 ) | 0.04 | 0.00 |
| Not Hispanic/Latinx Ethnicity | 30609 | 15361 | ( 50 ) | 15248 | ( 50 ) | 0.02 | 0.00 |
| Unknown                       | 5749  | 2669  | ( 46 ) | 3080  | ( 54 ) | 0.06 | 0.00 |

|                                                                |       |       |        |       |        |        |       |
|----------------------------------------------------------------|-------|-------|--------|-------|--------|--------|-------|
| Age, continuous (mean, std)                                    | 73.7  | 71.7  | ( 11 ) | 75.6  | ( 10 ) | 0.36   | 0.02  |
| <b>Setting Characteristics</b>                                 |       |       |        |       |        |        |       |
| <b>Admitting Hospital</b>                                      |       |       |        |       |        |        |       |
| Community                                                      | 10439 | 5942  | ( 57 ) | 4497  | ( 43 ) | 0.19   | -0.02 |
| Tertiary                                                       | 29359 | 13791 | ( 47 ) | 15568 | ( 53 ) | <0.001 | 0.02  |
| Unknown                                                        | 1047  | 673   | ( 64 ) | 374   | ( 36 ) | <0.001 | 0.00  |
| <b>Urban-Rural Classification of Facility</b>                  |       |       |        |       |        |        |       |
| Large Central Metro/Large Fringe Metro                         | 26242 | 12379 | ( 47 ) | 13863 | ( 53 ) | 0.15   | 0.00  |
| Medium Metro/Small Metro                                       | 12785 | 6885  | ( 54 ) | 5900  | ( 46 ) | 0.11   | 0.00  |
| Micropolitan/Non-Core                                          | 724   | 448   | ( 62 ) | 276   | ( 38 ) | 0.06   | -0.01 |
| Unknown                                                        | 1094  | 694   | ( 63 ) | 400   | ( 37 ) | 0.09   | 0.00  |
| <b>Hospital Beds</b>                                           |       |       |        |       |        |        |       |
| 0-49 beds                                                      | 1215  | 631   | ( 52 ) | 584   | ( 48 ) | -      | -     |
| 50-99 beds                                                     | 2550  | 1127  | ( 44 ) | 1423  | ( 56 ) | -      | -     |
| 100-249 beds                                                   | 14281 | 5952  | ( 42 ) | 8329  | ( 58 ) | -      | -     |
| 250+ beds                                                      | 21752 | 12023 | ( 55 ) | 9729  | ( 45 ) | -      | -     |
| Unknown                                                        | 1047  | 673   | ( 64 ) | 374   | ( 36 ) | -      | -     |
| <b>Hospital Ownership</b>                                      |       |       |        |       |        |        |       |
| Non-Profit                                                     | 39170 | 19384 | ( 49 ) | 19786 | ( 51 ) | -      | -     |
| For Profit / Other                                             | 1675  | 1022  | ( 61 ) | 653   | ( 39 ) | -      | -     |
| <b>Underlying medical conditions (more than one may apply)</b> |       |       |        |       |        |        |       |
| Chronic respiratory condition                                  | 26942 | 13018 | ( 48 ) | 13924 | ( 52 ) | -      | -     |
| Chronic non-respiratory condition                              | 37225 | 18089 | ( 49 ) | 19136 | ( 51 ) | 0.18   | 0.01  |
| Asthma                                                         | 6138  | 2290  | ( 37 ) | 3848  | ( 63 ) | 0.21   | 0.02  |
| COPD                                                           | 12427 | 6153  | ( 50 ) | 6274  | ( 50 ) | 0.01   | 0.01  |

|                                                                   |       |       |               |       |               |      |       |
|-------------------------------------------------------------------|-------|-------|---------------|-------|---------------|------|-------|
| Other Chronic Lung Disease                                        | 17316 | 9029  | ( 52 )        | 8287  | ( 48 )        | 0.08 | -0.01 |
| Heart Failure                                                     | 12598 | 5764  | ( 46 )        | 6834  | ( 54 )        | 0.11 | 0.01  |
| Ischemic Heart Disease                                            | 12938 | 5831  | ( 45 )        | 7107  | ( 55 )        | 0.13 | 0.01  |
| Hypertension                                                      | 26902 | 12429 | ( 46 )        | 14473 | ( 54 )        | 0.21 | 0.02  |
| Other Heart Disease                                               | 21861 | 9993  | ( 46 )        | 11868 | ( 54 )        | 0.18 | 0.01  |
| Stroke                                                            | 1822  | 987   | ( 54 )        | 835   | ( 46 )        | -    | -     |
| Other Cerebrovascular Disease                                     | 1931  | 959   | ( 50 )        | 972   | ( 50 )        | -    | -     |
| Diabetes Type 1                                                   | 234   | 107   | ( 46 )        | 127   | ( 54 )        | -    | -     |
| Diabetes Type 2                                                   | 13824 | 6590  | ( 48 )        | 7234  | ( 52 )        | -    | -     |
| Diabetes due to underlying conditions or other specified diabetes | 210   | 133   | ( 63 )        | 77    | ( 37 )        | -    | -     |
| Other Metabolic Disease (excluding diabetes)                      | 25801 | 11632 | ( 45 )        | 14169 | ( 55 )        | 0.26 | 0.02  |
| Clinical Obesity                                                  | 9214  | 4578  | ( 50 )        | 4636  | ( 50 )        | -    | -     |
| Clinical Underweight                                              | 4512  | 2602  | ( 58 )        | 1906  | ( 42 )        | -    | -     |
| Renal Disease                                                     | 13397 | 5708  | ( 43 )        | 7689  | ( 57 )        | 0.21 | 0.02  |
| Liver Disease                                                     | 3936  | 1978  | ( 50 )        | 1958  | ( 50 )        | -    | -     |
| Blood Disorder                                                    | 3162  | 1496  | ( 47 )        | 1666  | ( 53 )        | -    | -     |
| Immunosuppression                                                 | 15453 | 7161  | ( 46 )        | 8292  | ( 54 )        | 0.11 | 0.01  |
| Organ Transplant                                                  | 598   | 273   | ( 46 )        | 325   | ( 54 )        | -    | -     |
| Cancer                                                            | 5895  | 2652  | ( 45 )        | 3243  | ( 55 )        | 0.08 | 0.02  |
| Dementia                                                          | 4312  | 2124  | ( 49 )        | 2188  | ( 51 )        | -    | -     |
| Other Neurological/Musculoskeletal Disorder                       | 13528 | 6595  | ( 49 )        | 6933  | ( 51 )        | 0.03 | 0.00  |
| Down Syndrome                                                     | 13    | 9     | ( 69 )        | 4     | ( 31 )        | -    | -     |
| Time Considerations (Median, Q1-Q3)                               |       |       |               |       |               |      |       |
| Epi-curve (days)                                                  | 4/17  | 4/16  | ( 3/22-5/12 ) | 4/17  | ( 3/24-5/12 ) | 0.06 | 0.01  |
| 7-day Moving Average Percent Positivity (days)                    | 4.2   | 5.1   | ( 3.4-6.6 )   | 3.2   | ( 1.3-5.1 )   | 0.63 | -0.04 |

<sup>1</sup>Variables with a SMD > 0.1 were included in PS weighting.

<sup>2</sup>Illustrates SMD prior to propensity weighting, to show differences between vaccinated and unvaccinated groups.

<sup>3</sup>SMD values after propensity weighting, SMD < 0.1 indicates no differences between groups, and that balance was achieved.

<sup>4</sup>Other race include Asian, Hawaiian or Other Pacific islander, American Indian or Alaskan Native, Other not-listed and multi-race.

**Table S35. Unweighted and weighted standardized mean differences (SMD) for variables included in PS model<sup>1</sup> for mRNA-specific VE estimates - Emergency department and urgent care medical events**

|                                                         | Unvaccinated |           | Partially or Fully Vaccinated |           | Unweighted<br>SMD <sup>2</sup> | Weighted<br>SMD <sup>3</sup> |
|---------------------------------------------------------|--------------|-----------|-------------------------------|-----------|--------------------------------|------------------------------|
|                                                         | N            | ( Row % ) | N                             | ( Row % ) |                                |                              |
| <b>A. Emergency department and urgent care</b>          |              |           |                               |           |                                |                              |
| All emergency department and urgent care medical events | 11812        | ( 56.1 )  | 9254                          | ( 43.9 )  |                                |                              |
| Site Characteristics                                    |              |           |                               |           |                                |                              |
| Site-region                                             |              |           |                               |           |                                |                              |
| Intermountain Healthcare - site-region 1                | 278          | ( 46.9 )  | 315                           | ( 53.1 )  | 0.064                          | 0.006                        |
| Intermountain Healthcare - site-region 2                | 180          | ( 51.0 )  | 173                           | ( 49.0 )  | 0.027                          | 0.003                        |
| Intermountain Healthcare - site-region 3                | 1542         | ( 48.4 )  | 1643                          | ( 51.6 )  | 0.131                          | 0.008                        |
| Intermountain Healthcare - site-region 4                | 721          | ( 51.4 )  | 681                           | ( 48.6 )  | 0.050                          | 0.003                        |
| Intermountain Healthcare - site-region 5                | 165          | ( 54.6 )  | 137                           | ( 45.4 )  | 0.007                          | 0.001                        |
| Intermountain Healthcare - site-region 6                | 623          | ( 56.0 )  | 490                           | ( 44.0 )  | 0.001                          | 0.000                        |
| Intermountain Healthcare - site-region 7                | 159          | ( 57.2 )  | 119                           | ( 42.8 )  | -0.005                         | 0.002                        |
| Intermountain Healthcare - site-region 8                | 944          | ( 60.9 )  | 607                           | ( 39.1 )  | -0.055                         | -0.006                       |
| Kaiser Permanente Northwest - site-region 1             | 915          | ( 43.1 )  | 1207                          | ( 56.9 )  | 0.176                          | 0.010                        |
| Kaiser Permanente Northwest - site-region 2             | 916          | ( 47.9 )  | 996                           | ( 52.1 )  | 0.105                          | 0.001                        |
| Kaiser Permanente Northwest - site-region 3             | 269          | ( 50.3 )  | 266                           | ( 49.7 )  | 0.038                          | 0.002                        |
| Regenstrief Institute - site-region 1                   | 658          | ( 74.4 )  | 227                           | ( 25.6 )  | -0.155                         | -0.014                       |
| Regenstrief Institute - site-region 2                   | 112          | ( 58.6 )  | 79                            | ( 41.4 )  | -0.010                         | -0.003                       |
| Regenstrief Institute - site-region 3                   | 316          | ( 62.7 )  | 188                           | ( 37.3 )  | -0.042                         | -0.008                       |
| Regenstrief Institute - site-region 4                   | 216          | ( 74.7 )  | 73                            | ( 25.3 )  | -0.089                         | -0.008                       |
| Regenstrief Institute - site-region 5                   | 574          | ( 66.0 )  | 296                           | ( 34.0 )  | -0.083                         | -0.008                       |
| Regenstrief Institute - site-region 6                   | 1455         | ( 63.3 )  | 844                           | ( 36.7 )  | -0.103                         | 0.005                        |
| Regenstrief Institute - site-region 7                   | 445          | ( 70.5 )  | 186                           | ( 29.5 )  | -0.103                         | -0.010                       |
| Regenstrief Institute - site-region 8                   | 119          | ( 68.8 )  | 54                            | ( 31.2 )  | -0.047                         | -0.005                       |
| Regenstrief Institute - site-region 9                   | 477          | ( 68.1 )  | 223                           | ( 31.9 )  | -0.091                         | 0.000                        |
| Regenstrief Institute - site-region 10                  | 233          | ( 59.6 )  | 158                           | ( 40.4 )  | -0.020                         | -0.003                       |
| Regenstrief Institute - site-region Missing             | 495          | ( 62.9 )  | 292                           | ( 37.1 )  | -0.055                         | 0.000                        |
| Patient Characteristics                                 |              |           |                               |           |                                |                              |
| Sex                                                     |              |           |                               |           |                                |                              |
| Female                                                  | 6334         | ( 55.1 )  | 5155                          | ( 44.9 )  |                                |                              |
| Male                                                    | 5487         | ( 57.3 )  | 4099                          | ( 42.7 )  |                                |                              |
| Race                                                    |              |           |                               |           |                                |                              |
| White                                                   | 9334         | ( 54.3 )  | 7857                          | ( 45.7 )  | 0.152                          | 0.014                        |



|                                                         |       |   |      |   |       |   |      |   |        |        |
|---------------------------------------------------------|-------|---|------|---|-------|---|------|---|--------|--------|
| Black                                                   | 604   | ( | 73.8 | ) | 214   | ( | 26.2 | ) | -0.145 | -0.012 |
| Other <sup>4</sup>                                      | 391   | ( | 54.0 | ) | 333   | ( | 46.0 | ) | 0.016  | 0.003  |
| Unknown                                                 | 1483  | ( | 63.6 | ) | 850   | ( | 36.4 | ) | -0.107 | -0.012 |
| Ethnicity                                               |       |   |      |   |       |   |      |   |        |        |
| Hispanic/Latinx Ethnicity                               | 725   | ( | 63.5 | ) | 417   | ( | 36.5 | ) | -0.072 | -0.013 |
| Not Hispanic/Latinx Ethnicity                           | 9718  | ( | 54.7 | ) | 8044  | ( | 45.3 | ) | 0.128  | 0.017  |
| Unknown                                                 | 1369  | ( | 63.3 | ) | 793   | ( | 36.7 | ) | -0.100 | -0.011 |
| Age, continuous (mean, std)                             | 67.84 | ( | 11.4 | ) | 72.52 | ( | 11.0 | ) | 0.410  | 0.020  |
| Setting Characteristics                                 |       |   |      |   |       |   |      |   |        |        |
| Urban-Rural Classification of Facility                  |       |   |      |   |       |   |      |   |        |        |
| Large Central Metro/Large Fringe Metro                  | 4974  | ( | 53.8 | ) | 4278  | ( | 46.2 | ) | 0.083  | 0.010  |
| Medium Metro/Small Metro                                | 4744  | ( | 56.3 | ) | 3676  | ( | 43.7 | ) | -0.009 | -0.001 |
| Micropolitan/Non-Core                                   | 1420  | ( | 63.7 | ) | 808   | ( | 36.3 | ) | -0.107 | -0.012 |
| Unknown                                                 | 674   | ( | 57.8 | ) | 492   | ( | 42.2 | ) | -0.017 | -0.003 |
| Underlying medical conditions (more than one may apply) |       |   |      |   |       |   |      |   |        |        |
| Chronic respiratory condition                           | 3832  | ( | 53.2 | ) | 3372  | ( | 46.8 | ) | 0.084  | -0.008 |
| Chronic non-respiratory condition                       | 6483  | ( | 52.3 | ) | 5922  | ( | 47.7 | ) | 0.185  | 0.002  |
| Asthma                                                  | 667   | ( | 47.8 | ) | 728   | ( | 52.2 | ) | 0.089  | 0.008  |
| COPD                                                    | 1968  | ( | 55.5 | ) | 1580  | ( | 44.5 | ) | 0.011  | -0.002 |
| Other Chronic Lung Disease                              | 1939  | ( | 50.8 | ) | 1879  | ( | 49.2 | ) |        |        |
| Heart Failure                                           | 1509  | ( | 49.7 | ) | 1528  | ( | 50.3 | ) | 0.106  | 0.000  |
| Ischemic Heart Disease                                  | 1461  | ( | 49.3 | ) | 1504  | ( | 50.7 | ) | 0.112  | -0.004 |
| Hypertension                                            | 3869  | ( | 50.2 | ) | 3831  | ( | 49.8 | ) | 0.179  | 0.010  |
| Other Heart Disease                                     | 2802  | ( | 49.4 | ) | 2865  | ( | 50.6 | ) | 0.163  | 0.008  |
| Stroke                                                  | 210   | ( | 46.8 | ) | 239   | ( | 53.2 | ) | 0.056  | 0.005  |
| Other CD                                                | 165   | ( | 49.5 | ) | 168   | ( | 50.5 | ) |        |        |
| Type 1 Diabetes                                         | 35    | ( | 36.8 | ) | 60    | ( | 63.2 | ) |        |        |
| Type 2 Diabetes                                         | 2042  | ( | 51.4 | ) | 1932  | ( | 48.6 | ) | 0.092  | 0.004  |
| Other Diabetes                                          | 24    | ( | 45.3 | ) | 29    | ( | 54.7 | ) |        |        |
| Other Metabolic Disease (excluding diabetes)            | 2926  | ( | 49.3 | ) | 3007  | ( | 50.7 | ) | 0.172  | 0.015  |
| Clinical Obesity                                        | 1203  | ( | 51.3 | ) | 1140  | ( | 48.7 | ) |        |        |
| Clinical Underweight                                    | 409   | ( | 55.4 | ) | 329   | ( | 44.6 | ) |        |        |
| Renal Disease                                           | 1522  | ( | 45.9 | ) | 1795  | ( | 54.1 | ) | 0.179  | 0.017  |
| Liver                                                   | 463   | ( | 54.7 | ) | 383   | ( | 45.3 | ) | 0.011  | -0.005 |
| Blood                                                   | 342   | ( | 46.2 | ) | 398   | ( | 53.8 | ) |        |        |
| Immunosuppression                                       | 2017  | ( | 48.6 | ) | 2130  | ( | 51.4 | ) | 0.149  | 0.016  |
| Organ Transplant                                        | 62    | ( | 46.6 | ) | 71    | ( | 53.4 | ) |        |        |

|                                                |      |   |           |   |      |   |           |   |        |        |
|------------------------------------------------|------|---|-----------|---|------|---|-----------|---|--------|--------|
| Cancer                                         | 533  | ( | 50.0      | ) | 532  | ( | 50.0      | ) | 0.056  | 0.005  |
| Dementia                                       | 443  | ( | 42.8      | ) | 591  | ( | 57.2      | ) | 0.122  | 0.012  |
| Other Neurological/Musculoskeletal Disorder    | 1637 | ( | 49.3      | ) | 1685 | ( | 50.7      | ) | 0.119  | 0.005  |
| Down Syndrome                                  | 2    | ( | 50.0      | ) | 2    | ( | 50.0      | ) |        |        |
| Time Considerations (Median, Q1-Q3)            |      |   |           |   |      |   |           |   |        |        |
| Epi-curve (days)                               | 4/13 |   | 3/16-5/13 |   | 4/25 |   | 3/30-5/18 |   | 0.299  | 0.040  |
| 7-day Moving Average Percent Positivity (days) | 4.96 |   | 3.86-6.38 |   | 4.6  |   | 3.65-5.62 |   | -0.273 | -0.031 |

<sup>1</sup>Variables with a SMD > 0.1 in the pooled mRNA and J and J sample were included in PS weighting.

<sup>2</sup>Illustrates SMD prior to propensity weighting, to show differences between vaccinated and unvaccinated groups.

<sup>3</sup>SMD values after propensity weighting, SMD < 0.2 indicates no differences between groups, and that balance was achieved. Variables where balance was not achieved were included directly as covariates in the VE models.

<sup>4</sup>Other race include Asian, Hawaiian or Other Pacific islander, American Indian or Alaskan Native, Other not-listed and multi-race.

Table S36. Unweighted and weighted standardized mean differences (SMD) for variables included in PS model<sup>1</sup> for unvaccinated and J&J vaccinees only - Hospitalization events

|                                                       | Unvaccinated |           | Fully Vaccinated |           | Unweighted<br>SMD <sup>2</sup> | Weighted<br>SMD <sup>3</sup> |
|-------------------------------------------------------|--------------|-----------|------------------|-----------|--------------------------------|------------------------------|
|                                                       | N            | ( Row % ) | N                | ( Row % ) |                                |                              |
| <b>A. Hospitalizations</b>                            |              |           |                  |           |                                |                              |
| All Hospitalization events                            | 10761        | ( 0.94 )  | 707              | ( 0.06 )  |                                |                              |
| Site Characteristics                                  |              |           |                  |           |                                |                              |
| Site-region                                           |              |           |                  |           |                                |                              |
| Columbia University - site-region 1                   | 1141         | ( 0.97 )  | 38               | ( 0.03 )  | 0.20                           | 0.00                         |
| Intermountain Healthcare - site-region 1              | 87           | ( 0.91 )  | 9                | ( 0.09 )  | 0.05                           | -0.01                        |
| Intermountain Healthcare - site-regions 2, 3          | 499          | ( 0.94 )  | 32               | ( 0.06 )  | 0.01                           | 0.02                         |
| Intermountain Healthcare - site-region 4              | 220          | ( 0.97 )  | 6                | ( 0.03 )  | 0.10                           | -0.07                        |
| Intermountain Healthcare - site-region 5              | 23           | ( 0.96 )  | 1                | ( 0.04 )  | 0.02                           | -0.02                        |
| Intermountain Healthcare - site-region 6              | 171          | ( 0.93 )  | 12               | ( 0.07 )  | 0.01                           | -0.02                        |
| Intermountain Healthcare - site-regions 7, 8          | 218          | ( 0.89 )  | 27               | ( 0.11 )  | 0.11                           | 0.00                         |
| Kaiser Permanente Northern California - site-region 1 | 198          | ( 0.92 )  | 18               | ( 0.08 )  | 0.05                           | 0.01                         |
| Kaiser Permanente Northern California - site-region 2 | 173          | ( 0.96 )  | 8                | ( 0.04 )  | 0.04                           | 0.00                         |
| Kaiser Permanente Northern California - site-region 3 | 850          | ( 0.93 )  | 61               | ( 0.07 )  | 0.03                           | 0.01                         |
| Kaiser Permanente Northern California - site-region 4 | 1059         | ( 0.85 )  | 186              | ( 0.15 )  | 0.44                           | 0.02                         |
| Kaiser Permanente Northern California - site-region 5 | 283          | ( 0.82 )  | 64               | ( 0.18 )  | 0.28                           | 0.00                         |
| Kaiser Permanente Northern California - site-region 6 | 103          | ( 0.83 )  | 21               | ( 0.17 )  | 0.15                           | 0.02                         |
| Kaiser Permanente Northern California - site-region 7 | 79           | ( 0.94 )  | 5                | ( 0.06 )  | 0.00                           | -0.02                        |
| Kaiser Permanente Northern California - site-region 8 | 267          | ( 0.91 )  | 27               | ( 0.09 )  | 0.08                           | -0.02                        |
| Kaiser Permanente Northwest - site-region 1           | 409          | ( 0.90 )  | 46               | ( 0.10 )  | 0.12                           | -0.02                        |
| Kaiser Permanente Northwest - site-region 2           | 80           | ( 0.93 )  | 6                | ( 0.07 )  | 0.01                           | -0.01                        |
| Kaiser Permanente Northwest - site-region 3, 4, 5     | 52           | ( 0.98 )  | 1                | ( 0.02 )  | 0.06                           | -0.01                        |
| Regenstrief Institute - site-regions 1,2,3            | 1593         | ( 0.98 )  | 38               | ( 0.02 )  | 0.32                           | -0.01                        |
| Regenstrief Institute - site-region 4                 | 346          | ( 0.97 )  | 9                | ( 0.03 )  | 0.13                           | 0.01                         |
| Regenstrief Institute - site-region 5                 | 1282         | ( 0.97 )  | 46               | ( 0.03 )  | 0.19                           | 0.08                         |
| Regenstrief Institute - site-regions 6,9              | 628          | ( 0.97 )  | 21               | ( 0.03 )  | 0.14                           | 0.02                         |
| Regenstrief Institute - site-regions 7,8,10           | 423          | ( 0.98 )  | 7                | ( 0.02 )  | 0.19                           | -0.06                        |
| Regenstrief Institute - site-region missing           | 402          | ( 0.98 )  | 10               | ( 0.02 )  | 0.15                           | -0.06                        |
| Patient Characteristics                               |              |           |                  |           |                                |                              |
| Sex                                                   |              |           |                  |           | -                              | -                            |
| Female                                                | 5685         | ( 0.94 )  | 388              | ( 0.06 )  |                                |                              |
| Male                                                  | 5076         | ( 0.95 )  | 319              | ( 0.05 )  |                                |                              |

|                                                         |      |   |           |   |       |   |           |   |      |       |
|---------------------------------------------------------|------|---|-----------|---|-------|---|-----------|---|------|-------|
| Race                                                    |      |   |           |   |       |   |           |   |      |       |
| White                                                   | 6869 | ( | 0.94      | ) | 453   | ( | 0.06      | ) | 0.01 | -0.02 |
| Black                                                   | 1445 | ( | 0.94      | ) | 85    | ( | 0.06      | ) | 0.04 | 0.05  |
| Other <sup>4</sup>                                      | 573  | ( | 0.88      | ) | 77    | ( | 0.12      | ) | 0.21 | 0.01  |
| Unknown                                                 | 1874 | ( | 0.95      | ) | 92    | ( | 0.05      | ) | 0.12 | -0.03 |
| Ethnicity                                               |      |   |           |   |       |   |           |   |      |       |
| Hispanic/Latinx Ethnicity                               | 1267 | ( | 0.94      | ) | 87    | ( | 0.06      | ) | 0.02 | -0.03 |
| Not Hispanic/Latinx Ethnicity                           | 7554 | ( | 0.94      | ) | 460   | ( | 0.06      | ) | 0.11 | -0.01 |
| Unknown                                                 | 1940 | ( | 0.92      | ) | 160   | ( | 0.08      | ) | 0.12 | 0.04  |
| Age, continuous (mean, std)                             | 69.4 | ( | 11.5      | ) | 69.5  | ( | 11.7      | ) | 0.01 | -0.05 |
| Setting Characteristics                                 |      |   |           |   |       |   |           |   |      |       |
| Urban-Rural Classification of Facility                  |      |   |           |   |       |   |           |   |      |       |
| Large Central Metro/Large Fringe Metro                  | 7158 | ( | 0.93      | ) | 522   | ( | 0.07      | ) | 0.16 | 0.08  |
| Medium Metro/Small Metro                                | 2900 | ( | 0.64      | ) | 1644  | ( | 0.36      | ) | 0.09 | -0.06 |
| Micropolitan/Non-Core                                   | 282  | ( | 0.97      | ) | 9     | ( | 0.03      | ) | 0.10 | -0.01 |
| Unknown                                                 | 421  | ( | 0.97      | ) | 12    | ( | 0.03      | ) | 0.13 | -0.06 |
| Underlying medical conditions (more than one may apply) |      |   |           |   |       |   |           |   |      |       |
| Chronic respiratory condition                           | 6824 | ( | 0.93      | ) | 481   | ( | 0.07      | ) |      |       |
| Chronic non-respiratory condition                       | 9249 | ( | 0.93      | ) | 674   | ( | 0.07      | ) | 0.33 | 0.09  |
| Time Considerations (Median, Q1-Q3)                     |      |   |           |   |       |   |           |   |      |       |
| Epi-curve (days)                                        | 4/30 |   | 4/12-5/19 |   | 05/01 |   | 4/15-5/20 |   | 0.06 | 0.04  |
| 7-day Moving Average Percent Positivity (%)             | 4.4  |   | 2.6-5.8   |   | 2.3   |   | 1.1-4.7   |   | 0.61 | -0.06 |

<sup>1</sup>Variables with a SMD > 0.1 in the pooled mRNA and J and J sample were included in PS weighting.

<sup>2</sup>Illustrates SMD prior to propensity weighting, to show differences between vaccinated and unvaccinated groups.

<sup>3</sup>SMD values after propensity weighting, SMD < 0.2 indicates no differences between groups, and that balance was achieved. Variables where balance was not achieved were included directly as covariates in the VE models.

<sup>4</sup>Other race include Asian, Hawaiian or Other Pacific islander, American Indian or Alaskan Native, Other not-listed and multi-race.

**Table S37. Unweighted and weighted standardized mean differences (SMD) for variables included in PS model<sup>1</sup> for unvaccinated and J&J vaccinees only - Emergency department and urgent care medical events**

|                                                         | Unvaccinated |           | Fully Vaccinated |           | Unweighted<br>SMD <sup>2</sup> | Weighted<br>SMD <sup>3</sup> |
|---------------------------------------------------------|--------------|-----------|------------------|-----------|--------------------------------|------------------------------|
|                                                         | N            | ( Row % ) | N                | ( Row % ) |                                |                              |
| <b>A. Emergency department and urgent care</b>          |              |           |                  |           |                                |                              |
| All emergency department and urgent care medical events | 8461         | ( 94.9 )  | 456              | ( 5.1 )   |                                |                              |
| Site Characteristics                                    |              |           |                  |           |                                |                              |
| Site-region                                             |              |           |                  |           |                                |                              |
| Intermountain Healthcare - site-region 1                | 227          | ( 95.0 )  | 12               | ( 5.0 )   | -0.003                         | -0.001                       |
| Intermountain Healthcare - site-region 2                | 1278         | ( 93.8 )  | 84               | ( 6.2 )   | 0.092                          | 0.016                        |
| Intermountain Healthcare - site-region 4                | 519          | ( 97.0 )  | 16               | ( 3.0 )   | -0.111                         | 0.000                        |
| Intermountain Healthcare - site-region 5                | 118          | ( 93.7 )  | 8                | ( 6.3 )   | 0.030                          | 0.014                        |
| Intermountain Healthcare - site-region 6                | 493          | ( 93.7 )  | 33               | ( 6.3 )   | 0.060                          | -0.022                       |
| Intermountain Healthcare - site-region 7                | 717          | ( 91.9 )  | 63               | ( 8.1 )   | 0.189                          | 0.032                        |
| Kaiser Permanente Northwest - site-region 1             | 741          | ( 90.8 )  | 75               | ( 9.2 )   | 0.267                          | -0.004                       |
| Kaiser Permanente Northwest - site-region 2             | 493          | ( 94.8 )  | 27               | ( 5.2 )   | 0.004                          | 0.034                        |
| Kaiser Permanente Northwest - site-region 3             | 224          | ( 95.3 )  | 11               | ( 4.7 )   | -0.015                         | 0.028                        |
| Regenstrief Institute - site-region 1                   | 891          | ( 97.3 )  | 25               | ( 2.7 )   | -0.166                         | -0.037                       |
| Regenstrief Institute - site-region 4                   | 404          | ( 96.7 )  | 14               | ( 3.3 )   | -0.081                         | 0.021                        |
| Regenstrief Institute - site-region 5                   | 1044         | ( 96.3 )  | 40               | ( 3.7 )   | -0.109                         | 0.046                        |
| Regenstrief Institute - site-region 6                   | 475          | ( 96.9 )  | 15               | ( 3.1 )   | -0.102                         | -0.075                       |
| Regenstrief Institute - site-region 7                   | 454          | ( 97.0 )  | 14               | ( 3.0 )   | -0.103                         | -0.047                       |
| Regenstrief Institute - site-region missing             | 383          | ( 95.3 )  | 19               | ( 4.7 )   | -0.017                         | -0.016                       |
| Patient Characteristics                                 |              |           |                  |           |                                |                              |
| Sex                                                     |              |           |                  |           |                                |                              |
| Female                                                  | 4554         | ( 94.6 )  | 260              | ( 5.4 )   |                                |                              |
| Male                                                    |              |           |                  |           |                                |                              |
| Race                                                    |              |           |                  |           |                                |                              |
| White                                                   | 6542         | ( 94.6 )  | 373              | ( 5.4 )   | 0.107                          | 0.040                        |
| Black                                                   | 502          | ( 97.3 )  | 14               | ( 2.7 )   | -0.123                         | -0.033                       |
| Other <sup>4</sup>                                      | 302          | ( 94.7 )  | 17               | ( 5.3 )   | 0.009                          | -0.050                       |
| Unknown                                                 | 1115         | ( 95.5 )  | 52               | ( 4.5 )   | -0.053                         | 0.001                        |
| Ethnicity                                               |              |           |                  |           |                                |                              |
| Hispanic/Latinx Ethnicity                               | 586          | ( 95.4 )  | 28               | ( 4.6 )   | -0.031                         | -0.012                       |

|                                                         |       |           |       |           |        |        |
|---------------------------------------------------------|-------|-----------|-------|-----------|--------|--------|
| Not Hispanic/Latinx Ethnicity                           | 6849  | ( 94.7 )  | 380   | ( 5.3 )   | 0.061  | -0.002 |
| Unknown                                                 | 1026  | ( 95.5 )  | 48    | ( 4.5 )   | -0.049 | 0.012  |
| Age, continuous (mean, std)                             | 64.77 | ( 10.8 )  | 65.57 | ( 10.7 )  | 0.074  | -0.030 |
| Setting Characteristics                                 |       |           |       |           |        |        |
| Urban-Rural Classification of Facility                  |       |           |       |           |        |        |
| Large Central Metro/Large Fringe Metro                  | 3611  | ( 94.5 )  | 209   | ( 5.5 )   | 0.064  | -0.003 |
| Medium Metro/Small Metro                                | 3333  | ( 95.1 )  | 170   | ( 4.9 )   | -0.043 | 0.010  |
| Micropolitan/Non-Core                                   | 987   | ( 95.5 )  | 46    | ( 4.5 )   | -0.049 | -0.005 |
| Unknown                                                 | 530   | ( 94.5 )  | 31    | ( 5.5 )   | 0.022  | -0.006 |
| Underlying medical conditions (more than one may apply) |       |           |       |           |        |        |
| Chronic respiratory condition                           | 2654  | ( 93.7 )  | 179   | ( 6.3 )   | 0.169  | 0.029  |
| Chronic non-respiratory condition                       | 4382  | ( 94.4 )  | 258   | ( 5.6 )   | 0.096  | 0.013  |
| Time Considerations (Median, Q1-Q3)                     |       |           |       |           |        |        |
| Epi-curve (days)                                        | 4/30  | 4/9-5/21  | 5/11  | 4/22-5/27 | 0.361  | 0.065  |
| 7-day Moving Average Percent Positivity (%)             | 4.85  | 3.87-5.88 | 4.72  | 3.73-5.69 | -0.157 | -0.017 |

<sup>1</sup>Variables with a SMD > 0.1 in the pooled mRNA and J and J sample were included in PS weighting.

<sup>2</sup>Illustrates SMD prior to propensity weighting, to show differences between vaccinated and unvaccinated groups.

<sup>3</sup>SMD values after propensity weighting, SMD < 0.2 indicates no differences between groups, and that balance was achieved. Variables where balance was not achieved were included directly as covariates in the VE models.

<sup>4</sup>Other race include Asian, Hawaiian or Other Pacific islander, American Indian or Alaskan Native, Other not-listed and multi-race.

**Figure S21. Estimates of COVID-19 vaccine effectiveness (VE) among COVID-19 associated hospitalizations and emergency department or urgent care (ED/UC) encounters by vaccine product**

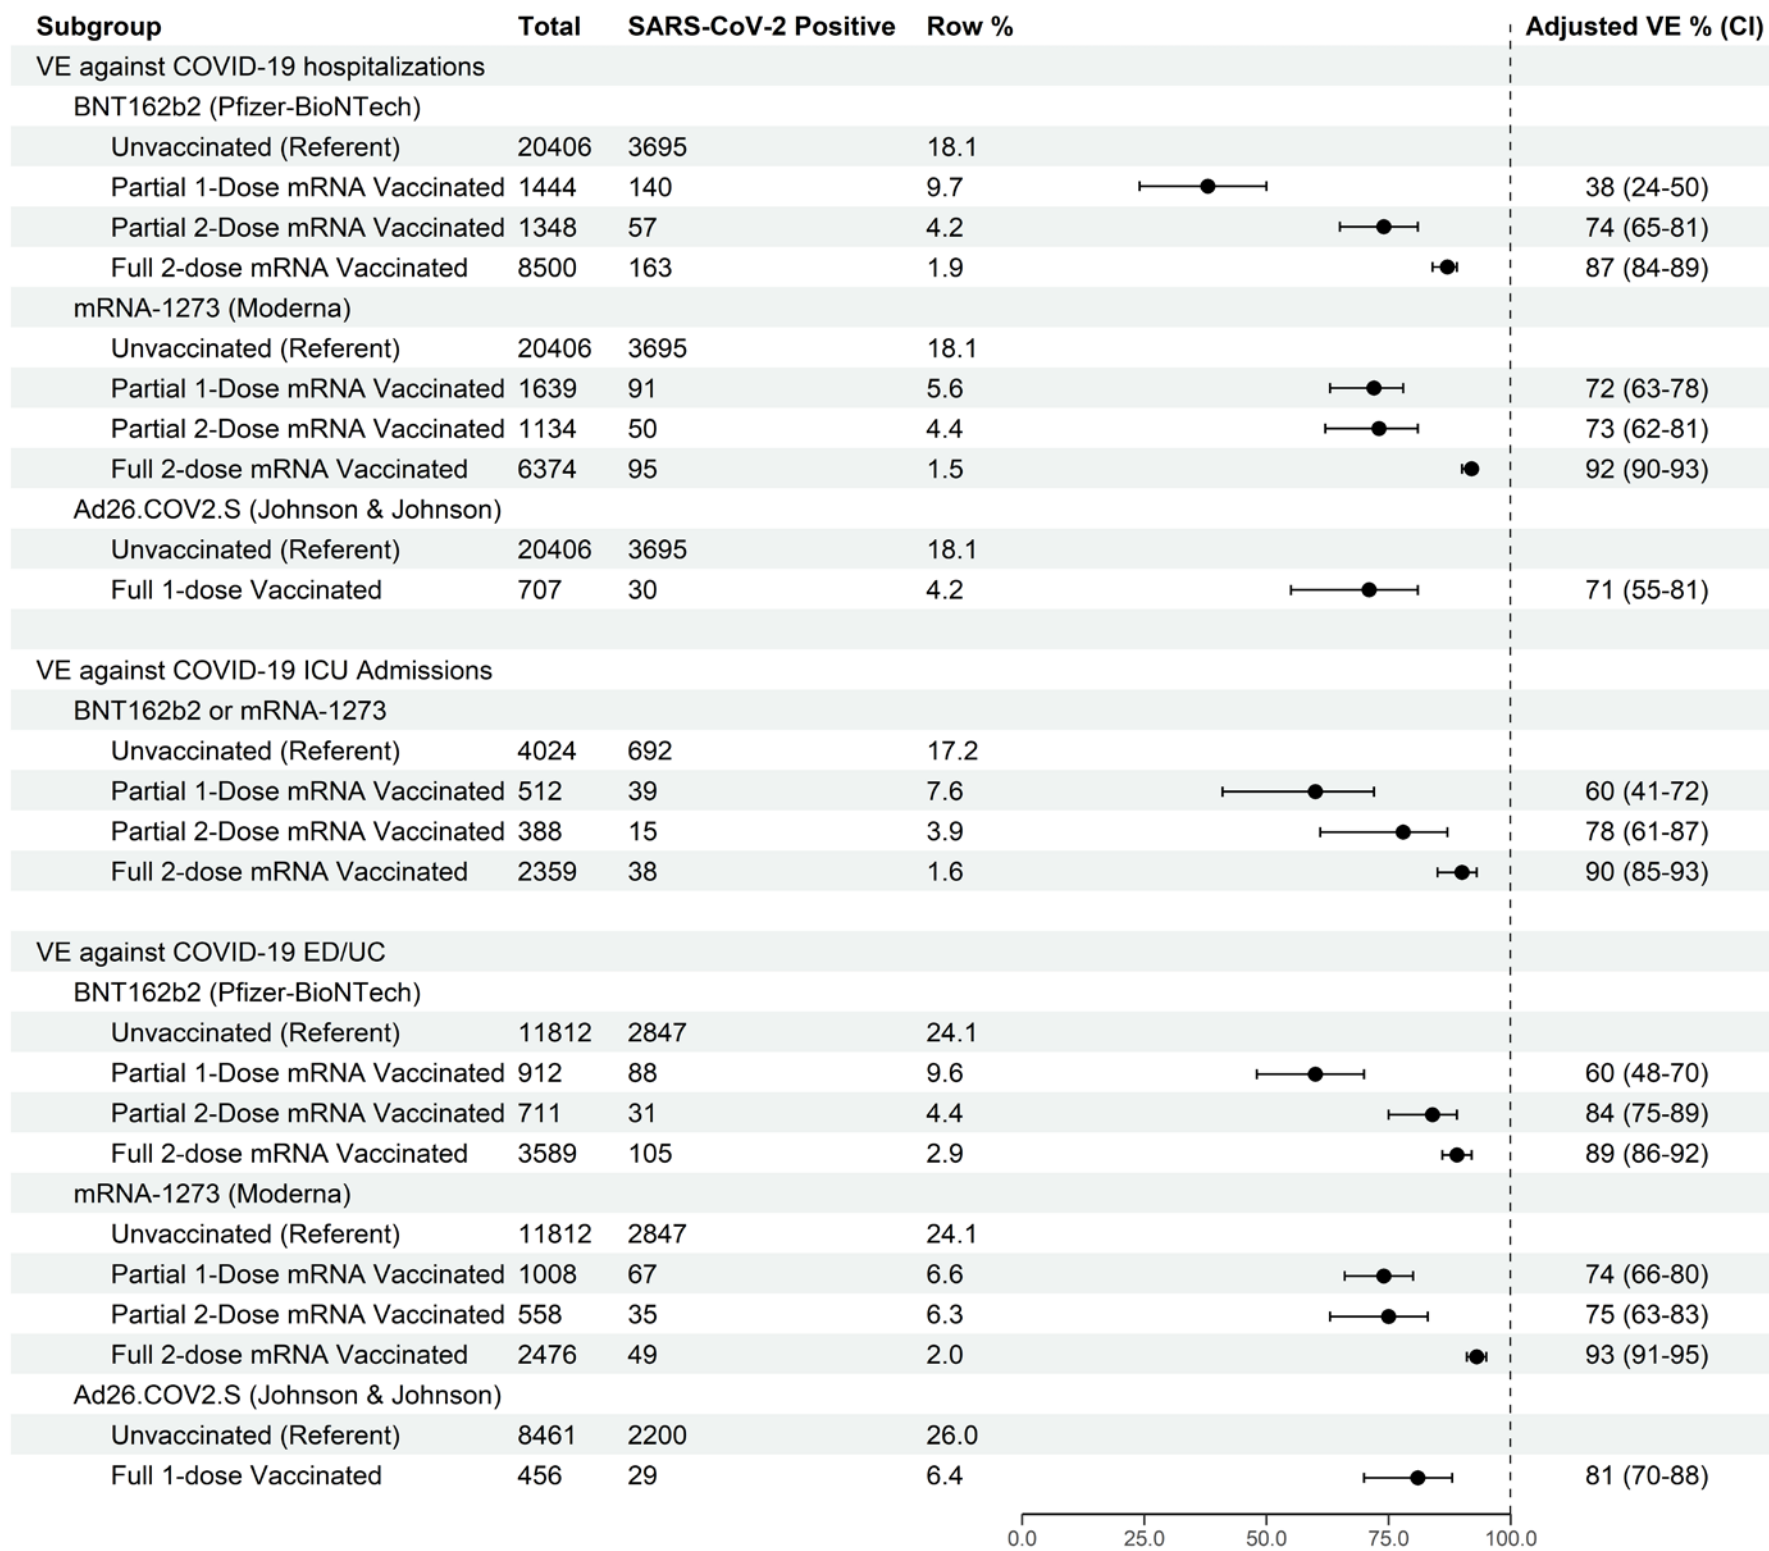

**Figure S22. Estimated vaccine effectiveness (VE) of full 2-dose vaccination with messenger RNA (mRNA) vaccines among COVID-19 associated hospitalizations by age group, race, ethnicity, and underlying medical conditions**

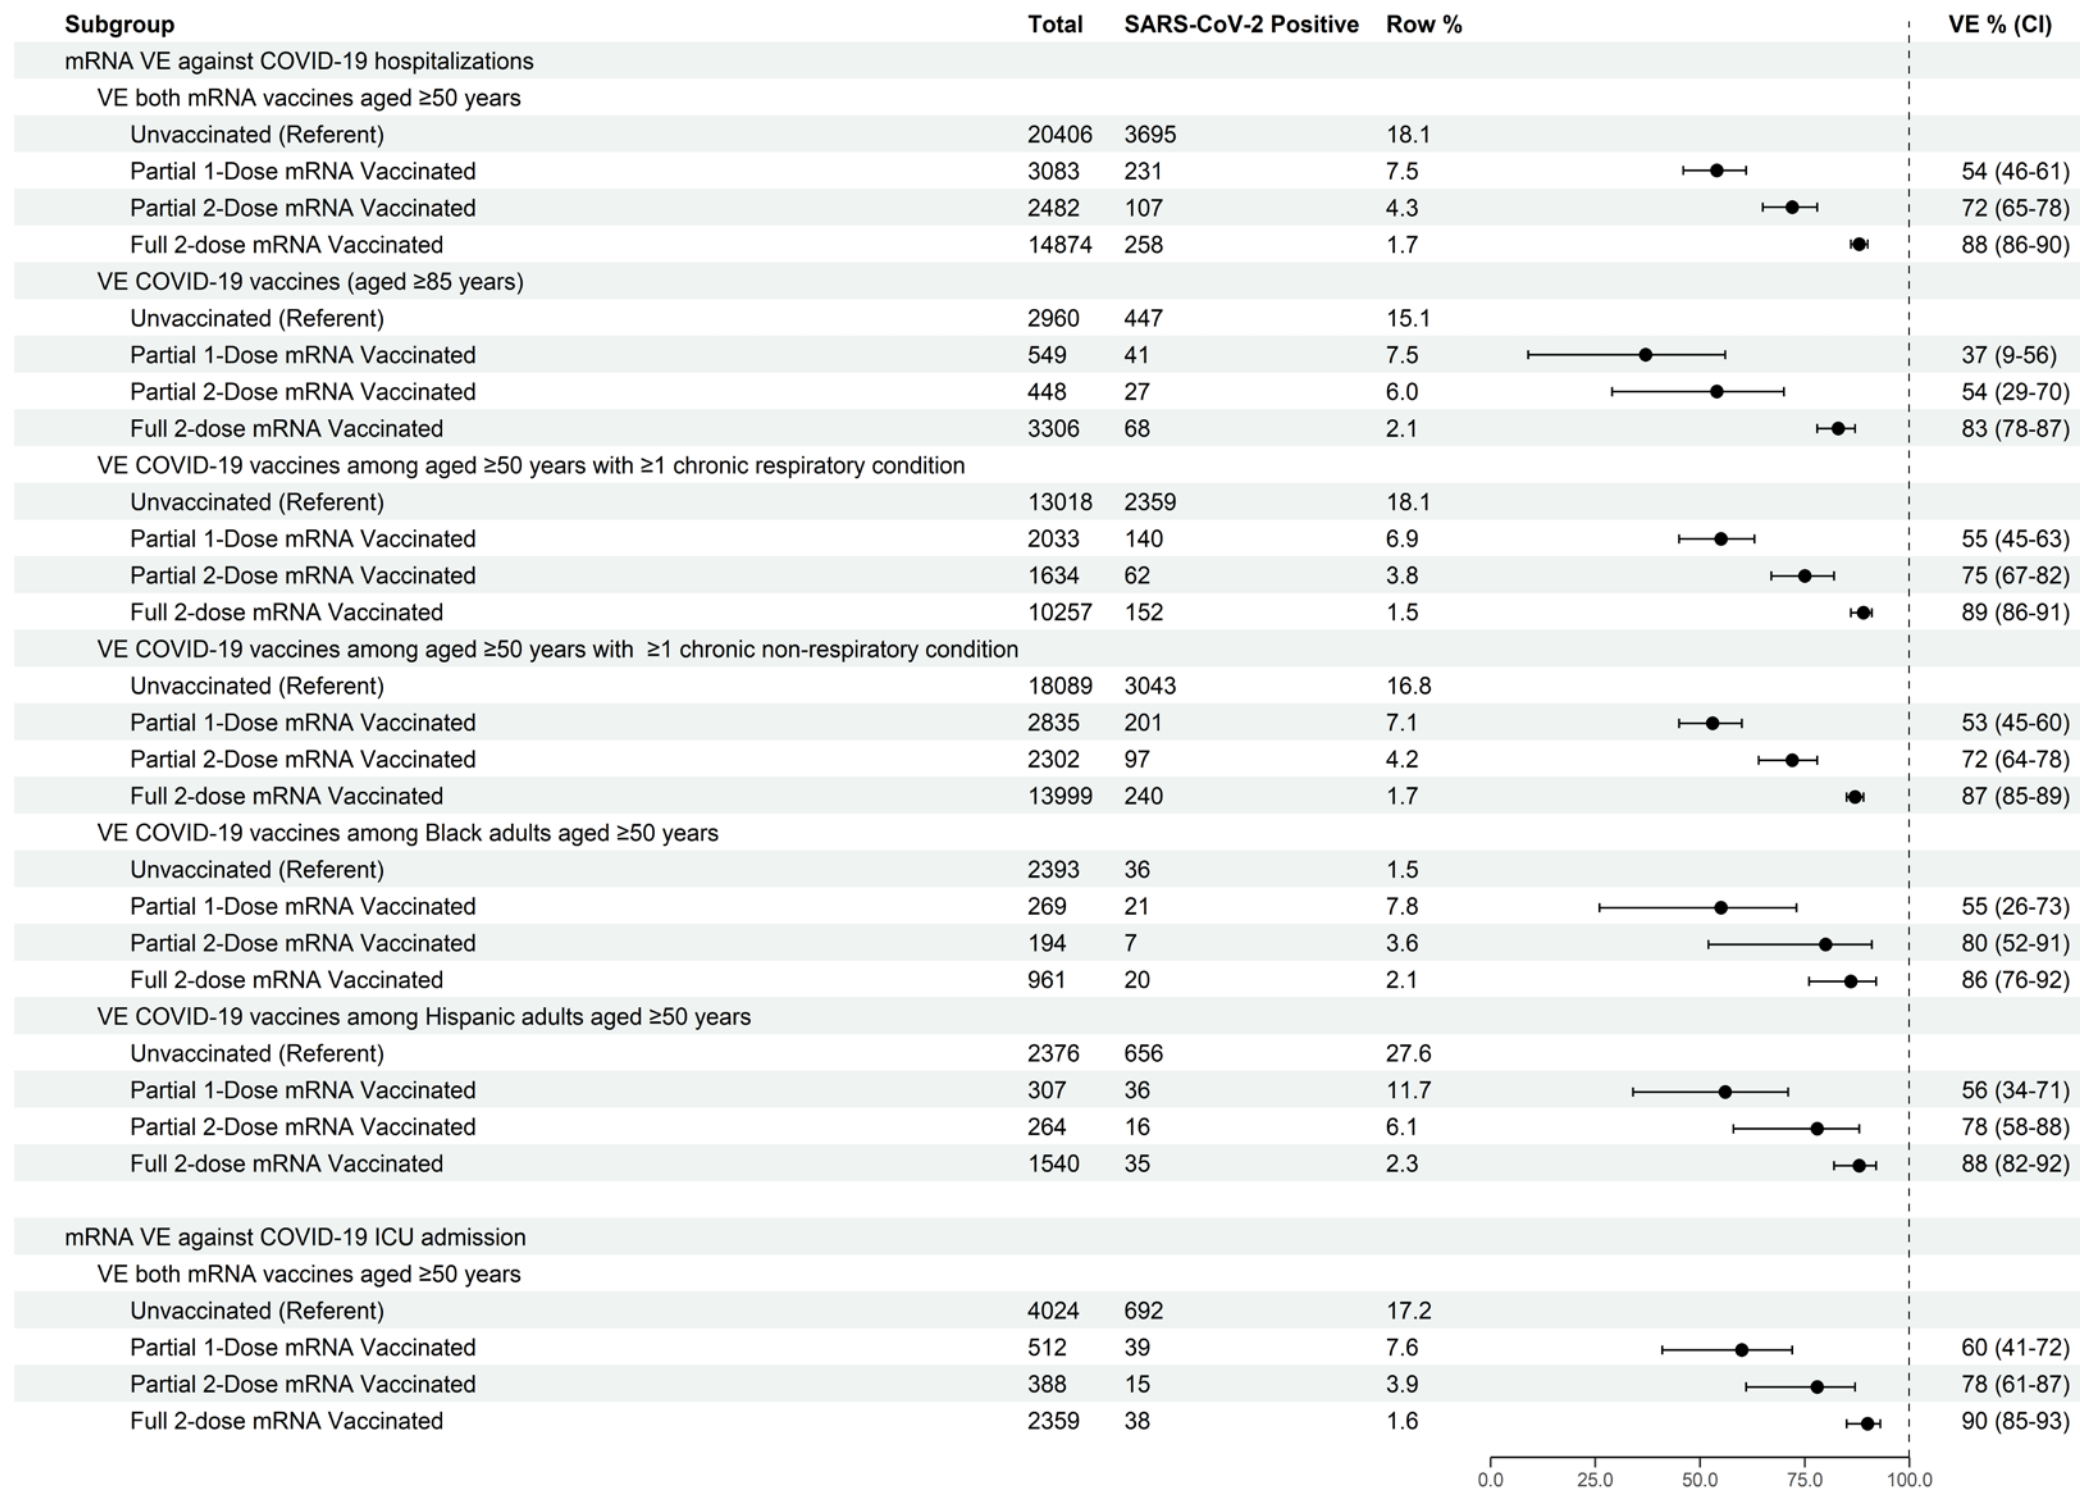



**Figure S23. Estimated vaccine effectiveness (VE) of full 2-dose vaccination with messenger RNA (mRNA) vaccines among COVID-19 associated emergency department or urgent care (ED/UC) encounters by age group, race, ethnicity, and underlying medical conditions.**

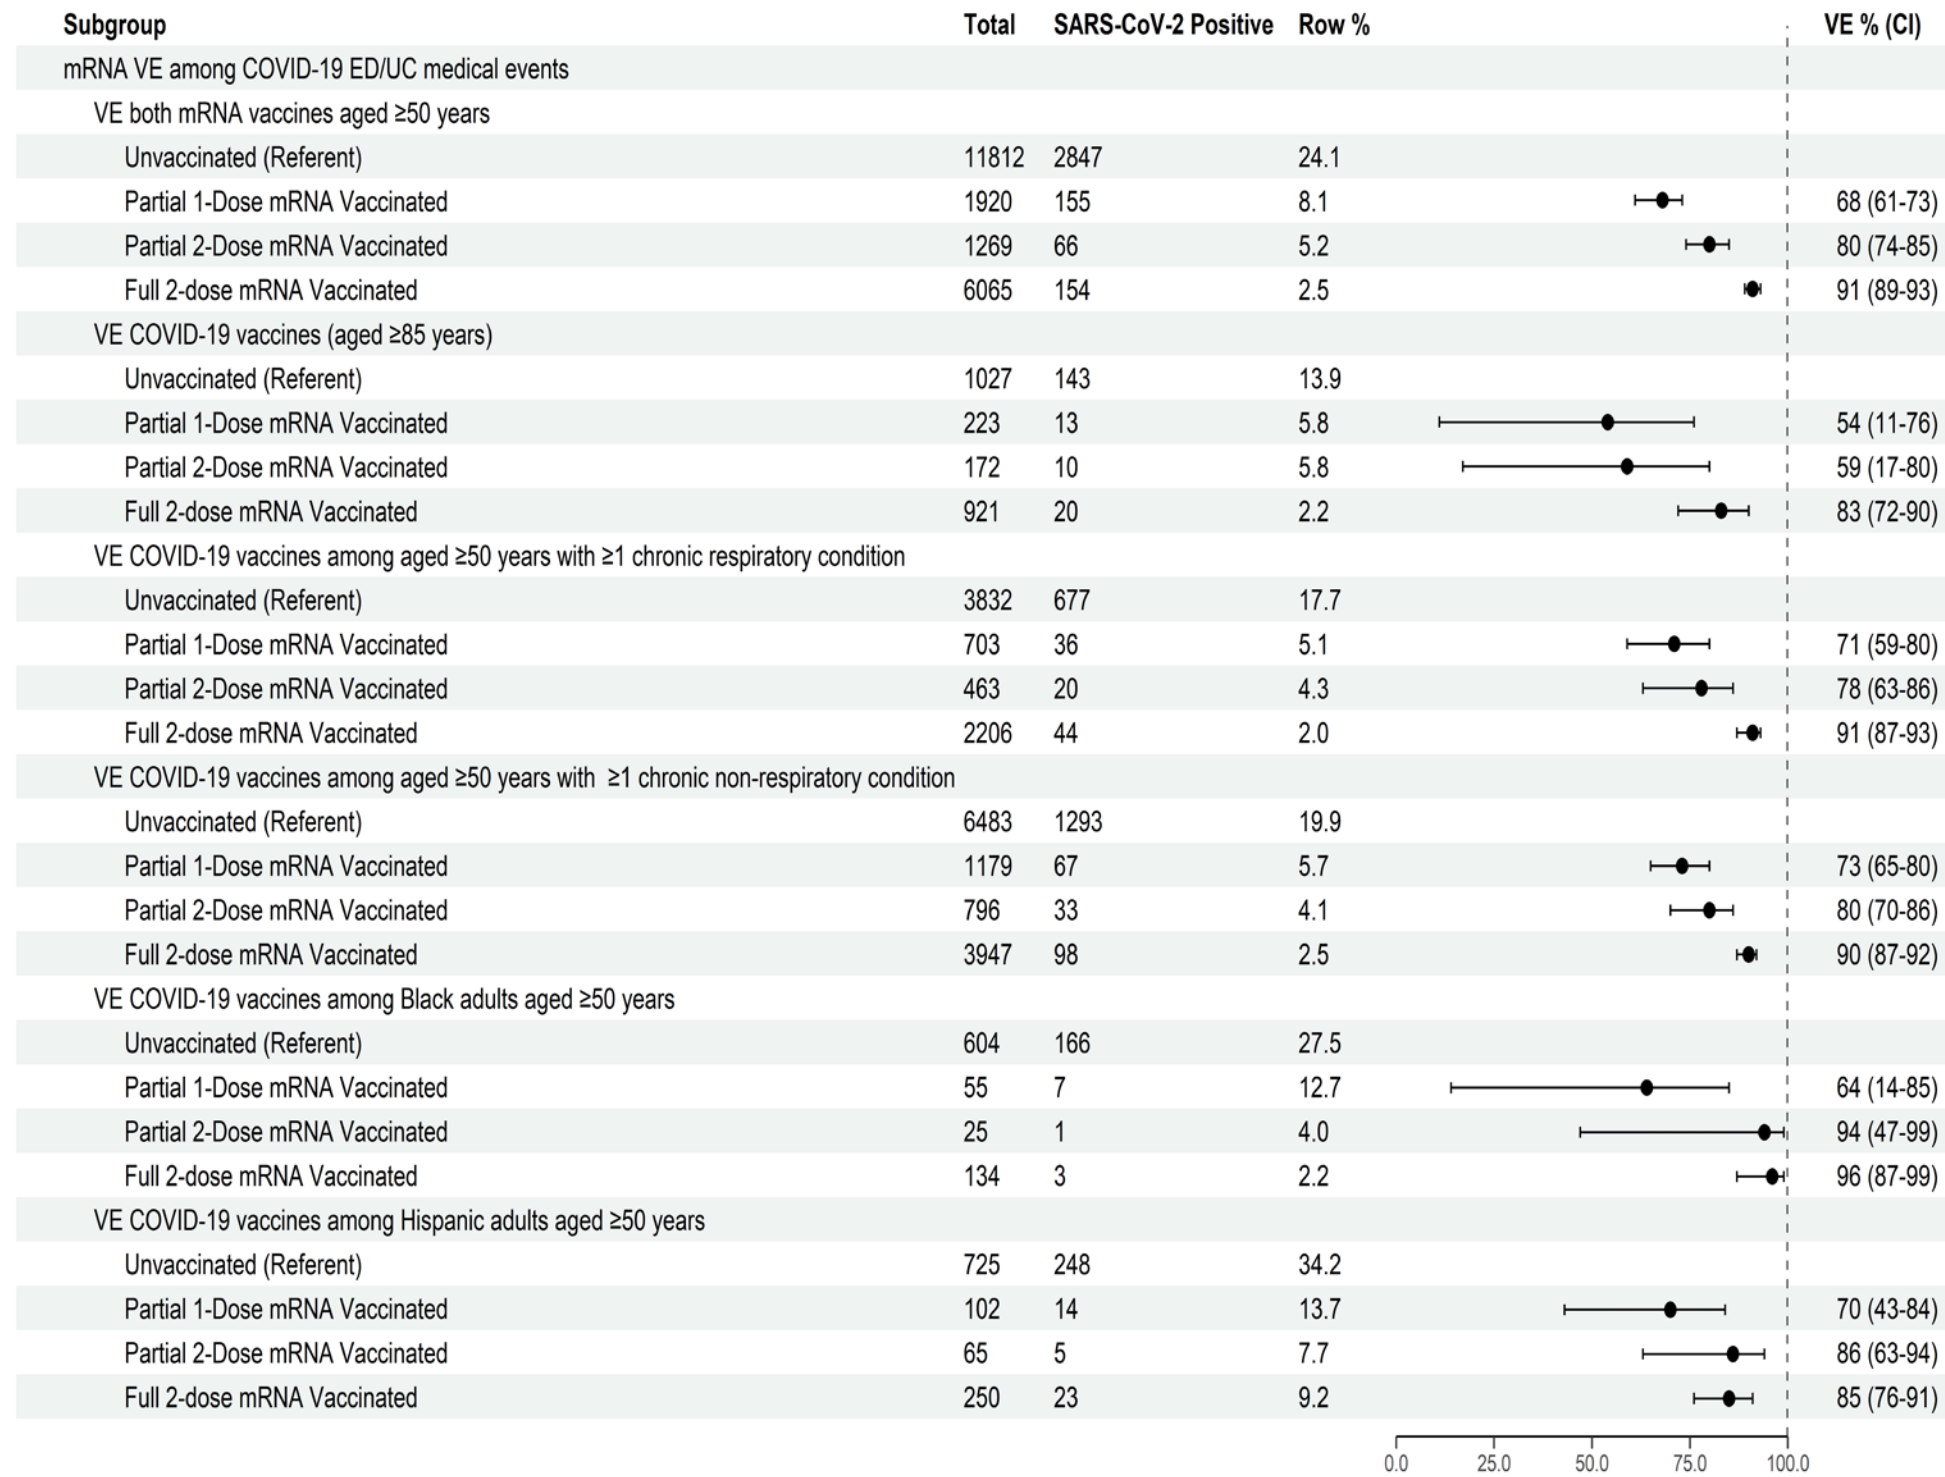

Supplement: NEJMoa2110362_appendix.pdf [file NEJMoa2110362_appendix.pdf]
