# Supplementary material
Source: PubMed Central journal article supplement (PMC8451184)

**Disclosure Purpose:** 21-10362

Summary of Interests

I do not have any interests to disclose at this time.

Additional Questions:

- 1. **Are there other relationships or activities that readers could perceive to have influenced, or that give the appearance of potentially influencing, what you wrote in the submitted work?**  
No.
- 2. **What is the manuscript title?**  
Effectiveness of COVID-19 Vaccines in Preventing Ambulatory and Inpatient Care
- 3. **Are you the corresponding author?**  
No.

Certification

I certify that the information provided in this disclosure is complete and accurate.

**Disclosure Purpose:** 21-10362

**Summary of Interests**

I do not have any interests to disclose at this time.

**Additional Questions:**

- 1. **Are there other relationships or activities that readers could perceive to have influenced, or that give the appearance of potentially influencing, what you wrote in the submitted work?**  
No.
- 2. **What is the manuscript title?**  
Effectiveness of COVID-19 Vaccines in Preventing Ambulatory and Inpatient Care
- 3. **Are you the corresponding author?**  
No.

**Certification**

I certify that the information provided in this disclosure is complete and accurate.

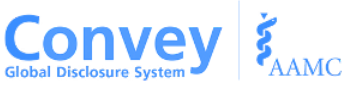

**Disclosure Purpose:** 21-10362

**Summary of Interests**

I do not have any interests to disclose at this time.

**Additional Questions:**

- 1. **Are there other relationships or activities that readers could perceive to have influenced, or that give the appearance of potentially influencing, what you wrote in the submitted work?**  
No.
- 2. **What is the manuscript title?**  
Effectiveness of COVID-19 Vaccines in Preventing Ambulatory and Inpatient Care
- 3. **Are you the corresponding author?**  
No.

**Certification**

I certify that the information provided in this disclosure is complete and accurate.

**Disclosure Purpose:** 21-10362

**Summary of Interests**

I do not have any interests to disclose at this time.

**Additional Questions:**

- 1. **Are there other relationships or activities that readers could perceive to have influenced, or that give the appearance of potentially influencing, what you wrote in the submitted work?**  
No.
- 2. **What is the manuscript title?**  
Effectiveness of COVID-19 Vaccines in Preventing Ambulatory and Inpatient Care
- 3. **Are you the corresponding author?**  
No.

**Certification**

I certify that the information provided in this disclosure is complete and accurate.

**Disclosure Purpose:** 21-10362

Summary of Interests

I do not have any interests to disclose at this time.

Additional Questions:

- 1. **Are there other relationships or activities that readers could perceive to have influenced, or that give the appearance of potentially influencing, what you wrote in the submitted work?**  
No.
- 2. **What is the manuscript title?**  
Effectiveness of COVID-19 Vaccines in Preventing Ambulatory and Inpatient Care
- 3. **Are you the corresponding author?**  
No.

Certification

I certify that the information provided in this disclosure is complete and accurate.



**Disclosure Purpose:** 21-10362

### Summary of Interests

I do not have any interests to disclose at this time.

### Additional Questions:

- Are there other relationships or activities that readers could perceive to have influenced, or that give the appearance of potentially influencing, what you wrote in the submitted work?**  
No.
- What is the manuscript title?**  
Effectiveness of COVID-19 Vaccines in Preventing Ambulatory and Inpatient Care
- Are you the corresponding author?**  
No.

### Certification

I certify that the information provided in this disclosure is complete and accurate.

**Disclosure Purpose:** 21-10362

**Summary of Interests**

I do not have any interests to disclose at this time.

**Additional Questions:**

- 1. **Are there other relationships or activities that readers could perceive to have influenced, or that give the appearance of potentially influencing, what you wrote in the submitted work?**  
No.
- 2. **What is the manuscript title?**  
Effectiveness of COVID-19 Vaccines in Preventing Ambulatory and Inpatient Care
- 3. **Are you the corresponding author?**  
No.

**Certification**

I certify that the information provided in this disclosure is complete and accurate.

**Disclosure Purpose:** 21-10362

**Summary of Interests**

I do not have any interests to disclose at this time.

**Additional Questions:**

- 1. **Are there other relationships or activities that readers could perceive to have influenced, or that give the appearance of potentially influencing, what you wrote in the submitted work?**  
No.
- 2. **What is the manuscript title?**  
Effectiveness of COVID-19 Vaccines in Preventing Ambulatory and Inpatient Care
- 3. **Are you the corresponding author?**  
No.

**Certification**

I certify that the information provided in this disclosure is complete and accurate.





**Disclosure Purpose:** 21-10362

Summary of Interests

I do not have any interests to disclose at this time.

Additional Questions:

- 1. **Are there other relationships or activities that readers could perceive to have influenced, or that give the appearance of potentially influencing, what you wrote in the submitted work?**  
No.
- 2. **What is the manuscript title?**  
COVID-19 Vaccine Effectiveness in Preventing Hospital, Emergency, and Urgent Care in a Multi-State Network
- 3. **Are you the corresponding author?**  
No.

Certification

I certify that the information provided in this disclosure is complete and accurate.

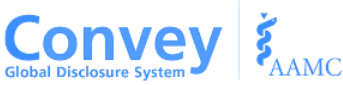

**Disclosure Purpose:** 21-10362

**Summary of Interests**

I do not have any interests to disclose at this time.

**Additional Questions:**

- 1. **Are there other relationships or activities that readers could perceive to have influenced, or that give the appearance of potentially influencing, what you wrote in the submitted work?**  
No.
- 2. **What is the manuscript title?**  
Effectiveness of COVID-19 Vaccines in Preventing Ambulatory and Inpatient Care
- 3. **Are you the corresponding author?**  
No.

**Certification**

I certify that the information provided in this disclosure is complete and accurate.



Disclosure Purpose: 21-10362

Summary of Interests

**Company or Organization**

| Entity                                                                                                                                                                                                                           | Type             | Interest Held By                                                                |
|----------------------------------------------------------------------------------------------------------------------------------------------------------------------------------------------------------------------------------|------------------|---------------------------------------------------------------------------------|
| <b>Centers for Disease Control and Prevention</b>                                                                                                                                                                                | Grant / Contract | Self                                                                            |
| <i>Recipient Name:</i> Trustees of Indiana University<br><i>Grant / Contract Description:</i> 75D30120C07986<br><i>Additional Information:</i> Virtual Network to Investigate the Trajectory of COVID-19-Related Severe Outcomes |                  | <i>Recipient Type:</i> Institution<br><i>Grant / Contract Purpose:</i> Research |
| <b>Indiana State Department of Health</b>                                                                                                                                                                                        | Grant / Contract | Self                                                                            |
| <i>Recipient Name:</i> Trustees of Indiana University<br><i>Grant / Contract Description:</i> Indiana Statewide Prevalence Study on COVID-19<br><i>Additional Information:</i>                                                   |                  | <i>Recipient Type:</i> Institution<br><i>Grant / Contract Purpose:</i> Research |

Additional Questions:

- Are there other relationships or activities that readers could perceive to have influenced, or that give the appearance of potentially influencing, what you wrote in the submitted work?**  
No.
- What is the manuscript title?**  
Effectiveness of COVID-19 Vaccines in Preventing Ambulatory and Inpatient Care
- Are you the corresponding author?**  
No.

Certification

I certify that the information provided in this disclosure is complete and accurate.

**Disclosure Purpose:** 21-10362

Summary of Interests

I do not have any interests to disclose at this time.

Additional Questions:

- 1. **Are there other relationships or activities that readers could perceive to have influenced, or that give the appearance of potentially influencing, what you wrote in the submitted work?**  
No.
- 2. **What is the manuscript title?**  
Effectiveness of COVID-19 Vaccines in Preventing Ambulatory and Inpatient Care
- 3. **Are you the corresponding author?**  
No.

Certification

I certify that the information provided in this disclosure is complete and accurate.



Disclosure Purpose: 21-10362

Summary of Interests

**Company or Organization**

| Entity                                                                             | Type   | Interest Held By                                    |
|------------------------------------------------------------------------------------|--------|-----------------------------------------------------|
| SANOPI PASTEUR INC.                                                                | Travel | Self                                                |
| Location(s): Paris, France<br>Additional Information: No compensation was received |        | Purpose: participate on Scientific Review Committee |

Additional Questions:

- Are there other relationships or activities that readers could perceive to have influenced, or that give the appearance of potentially influencing, what you wrote in the submitted work?  
No.
- What is the manuscript title?  
Effectiveness of COVID-19 Vaccines in Preventing Ambulatory and Inpatient Care
- Are you the corresponding author?  
No.

Certification

I certify that the information provided in this disclosure is complete and accurate.

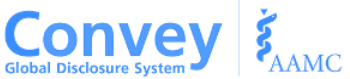

**Disclosure Purpose:** 21-10362

### Summary of Interests

I do not have any interests to disclose at this time.

### Additional Questions:

- Are there other relationships or activities that readers could perceive to have influenced, or that give the appearance of potentially influencing, what you wrote in the submitted work?**  
No.
- What is the manuscript title?**  
Effectiveness of COVID-19 Vaccines in Preventing Ambulatory and Inpatient Care
- Are you the corresponding author?**  
No.

### Certification

I certify that the information provided in this disclosure is complete and accurate.

**Disclosure Purpose:** 21-10362

**Summary of Interests**

I do not have any interests to disclose at this time.

**Additional Questions:**

- 1. **Are there other relationships or activities that readers could perceive to have influenced, or that give the appearance of potentially influencing, what you wrote in the submitted work?**  
No.
- 2. **What is the manuscript title?**  
Effectiveness of COVID-19 Vaccines in Preventing Ambulatory and Inpatient Care
- 3. **Are you the corresponding author?**  
No.

**Certification**

I certify that the information provided in this disclosure is complete and accurate.



**Disclosure Purpose:** 21-10362

## Summary of Interests

| Company or Organization                                                                                                                                            |                                                                                 |                  |
|--------------------------------------------------------------------------------------------------------------------------------------------------------------------|---------------------------------------------------------------------------------|------------------|
| Entity                                                                                                                                                             | Type                                                                            | Interest Held By |
| <a href="#">Centers for Disease Control and Prevention</a>                                                                                                         | Grant / Contract                                                                | Self             |
| <i>Recipient Name:</i> Baylor Scott & White Health<br><i>Grant / Contract Description:</i> CDC-Westat subcontract<br><i>Additional Information:</i> Salary support | <i>Recipient Type:</i> Institution<br><i>Grant / Contract Purpose:</i> Research |                  |

## Additional Questions:

- Are there other relationships or activities that readers could perceive to have influenced, or that give the appearance of potentially influencing, what you wrote in the submitted work?**  
No.
- What is the manuscript title?**  
Effectiveness of COVID-19 Vaccines in Preventing Ambulatory and inpatient Care.
- Are you the corresponding author?**  
No.

## Certification

I certify that the information provided in this disclosure is complete and accurate.



**Disclosure Purpose:** 21-10362

**Summary of Interests**

I do not have any interests to disclose at this time.

**Additional Questions:**

- 1. **Are there other relationships or activities that readers could perceive to have influenced, or that give the appearance of potentially influencing, what you wrote in the submitted work?**  
No.
- 2. **What is the manuscript title?**  
Effectiveness of COVID-19 Vaccines in Preventing Ambulatory and Inpatient Care
- 3. **Are you the corresponding author?**  
No.

**Certification**

I certify that the information provided in this disclosure is complete and accurate.



**Disclosure Purpose:** 21-10362

**Summary of Interests**

I do not have any interests to disclose at this time.

**Additional Questions:**

- 1. **Are there other relationships or activities that readers could perceive to have influenced, or that give the appearance of potentially influencing, what you wrote in the submitted work?**  
No.
- 2. **What is the manuscript title?**  
Effectiveness of COVID-19 Vaccines in Preventing Ambulatory and Inpatient Care
- 3. **Are you the corresponding author?**  
No.

**Certification**

I certify that the information provided in this disclosure is complete and accurate.

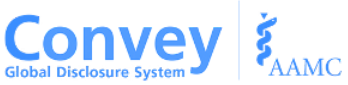

**Disclosure Purpose:** 21-10362

**Summary of Interests**

I do not have any interests to disclose at this time.

**Additional Questions:**

- 1. **Are there other relationships or activities that readers could perceive to have influenced, or that give the appearance of potentially influencing, what you wrote in the submitted work?**  
No.
- 2. **What is the manuscript title?**  
Effectiveness of COVID-19 Vaccines in Preventing Ambulatory and Inpatient Care
- 3. **Are you the corresponding author?**  
No.

**Certification**

I certify that the information provided in this disclosure is complete and accurate.



**Disclosure Purpose:** 21-10362

### Summary of Interests

I do not have any interests to disclose at this time.

### Additional Questions:

- Are there other relationships or activities that readers could perceive to have influenced, or that give the appearance of potentially influencing, what you wrote in the submitted work?**  
No.
- What is the manuscript title?**  
Effectiveness of COVID-19 Vaccines in Preventing Ambulatory and Inpatient Care
- Are you the corresponding author?**  
No.

### Certification

I certify that the information provided in this disclosure is complete and accurate.



**Disclosure Purpose:** 21-10362

### Summary of Interests

I do not have any interests to disclose at this time.

### Additional Questions:

- Are there other relationships or activities that readers could perceive to have influenced, or that give the appearance of potentially influencing, what you wrote in the submitted work?**  
No.
- What is the manuscript title?**  
Effectiveness of COVID-19 Vaccines in Preventing Ambulatory and Inpatient Care
- Are you the corresponding author?**  
No.

### Certification

I certify that the information provided in this disclosure is complete and accurate.

**Disclosure Purpose:** 21-10362

Summary of Interests

I do not have any interests to disclose at this time.

Additional Questions:

- 1. **Are there other relationships or activities that readers could perceive to have influenced, or that give the appearance of potentially influencing, what you wrote in the submitted work?**  
No.
- 2. **What is the manuscript title?**  
Effectiveness of COVID-19 Vaccines in Preventing Ambulatory and Inpatient Care
- 3. **Are you the corresponding author?**  
No.

Certification

I certify that the information provided in this disclosure is complete and accurate.



**Disclosure Purpose:** 21-10362

**Summary of Interests**

I do not have any interests to disclose at this time.

**Additional Questions:**

- 1. **Are there other relationships or activities that readers could perceive to have influenced, or that give the appearance of potentially influencing, what you wrote in the submitted work?**  
No.
- 2. **What is the manuscript title?**  
Effectiveness of COVID-19 Vaccines in Preventing Ambulatory and Inpatient Care
- 3. **Are you the corresponding author?**  
No.

**Certification**

I certify that the information provided in this disclosure is complete and accurate.

Disclosure Purpose: 21-10362

## Summary of Interests

### Company or Organization

| Entity                                                                                                                                                                                  | Type             | Interest Held By                                                                |
|-----------------------------------------------------------------------------------------------------------------------------------------------------------------------------------------|------------------|---------------------------------------------------------------------------------|
| <a href="#">GlaxoSmithKline</a>                                                                                                                                                         | Grant / Contract | Self                                                                            |
| <i>Recipient Name:</i> Kaiser Foundation Research Institute<br><i>Grant / Contract Description:</i> unrelated studies<br><i>Additional Information:</i>                                 |                  | <i>Recipient Type:</i> Institution<br><i>Grant / Contract Purpose:</i> Research |
| <a href="#">Merck</a>                                                                                                                                                                   | Grant / Contract | Self                                                                            |
| <i>Recipient Name:</i> Kaiser Foundation Research Institute<br><i>Grant / Contract Description:</i> unrelated studies<br><i>Additional Information:</i>                                 |                  | <i>Recipient Type:</i> Institution<br><i>Grant / Contract Purpose:</i> Research |
| <a href="#">Pfizer</a>                                                                                                                                                                  | Grant / Contract | Self                                                                            |
| <i>Recipient Name:</i> Kaiser Foundation Research Institute<br><i>Grant / Contract Description:</i> research support for COVID vaccine clinical trial<br><i>Additional Information:</i> |                  | <i>Recipient Type:</i> Institution<br><i>Grant / Contract Purpose:</i> Research |
| <a href="#">Protein Science</a>                                                                                                                                                         | Grant / Contract | Self                                                                            |
| <i>Recipient Name:</i> Kaiser Foundation Research Institute<br><i>Grant / Contract Description:</i> unrelated studies<br><i>Additional Information:</i>                                 |                  | <i>Recipient Type:</i> Institution<br><i>Grant / Contract Purpose:</i> Research |
| <a href="#">SANOFI PASTEUR INC.</a>                                                                                                                                                     | Grant / Contract | Self                                                                            |
| <i>Recipient Name:</i> Kaiser Foundation Research Institute<br><i>Grant / Contract Description:</i> unrelated studies<br><i>Additional Information:</i>                                 |                  | <i>Recipient Type:</i> Institution<br><i>Grant / Contract Purpose:</i> Research |

### Additional Questions:

- Are there other relationships or activities that readers could perceive to have influenced, or that give the appearance of potentially influencing, what you wrote in the submitted work?  
No.
- What is the manuscript title?  
Effectiveness of COVID-19 Vaccines in Preventing Ambulatory and Inpatient Care
- Are you the corresponding author?  
No.

### Certification

I certify that the information provided in this disclosure is complete and accurate.



**Disclosure Purpose:** 21-10362

Summary of Interests

I do not have any interests to disclose at this time.

Additional Questions:

- 1. **Are there other relationships or activities that readers could perceive to have influenced, or that give the appearance of potentially influencing, what you wrote in the submitted work?**  
No.
- 2. **What is the manuscript title?**  
Effectiveness of COVID-19 Vaccines in Preventing Ambulatory and Inpatient Care
- 3. **Are you the corresponding author?**  
No.

Certification

I certify that the information provided in this disclosure is complete and accurate.



**Disclosure Purpose:** 21-10362

Summary of Interests

I do not have any interests to disclose at this time.

Additional Questions:

- 1. **Are there other relationships or activities that readers could perceive to have influenced, or that give the appearance of potentially influencing, what you wrote in the submitted work?**  
No.
- 2. **What is the manuscript title?**  
Effectiveness of COVID-19 Vaccines in Preventing Ambulatory and Inpatient Care
- 3. **Are you the corresponding author?**  
No.

Certification

I certify that the information provided in this disclosure is complete and accurate.



**Disclosure Purpose:** 21-10362

## Summary of Interests

| Company or Organization                                                                                                                                                         |                  |                                                                                                                   |
|---------------------------------------------------------------------------------------------------------------------------------------------------------------------------------|------------------|-------------------------------------------------------------------------------------------------------------------|
| Entity                                                                                                                                                                          | Type             | Interest Held By                                                                                                  |
| Pfizer                                                                                                                                                                          | Grant / Contract | Self                                                                                                              |
| <i>Recipient Name:</i> Kaiser Foundation Research Institute<br><i>Grant / Contract Description:</i> Research grant for study of meningococcal B vaccine safety during pregnancy |                  | <i>Recipient Type:</i> Institution<br><i>Grant / Contract Purpose:</i> Research<br><i>Additional Information:</i> |

## Additional Questions:

- Are there other relationships or activities that readers could perceive to have influenced, or that give the appearance of potentially influencing, what you wrote in the submitted work?**  
No.
- What is the manuscript title?**  
Effectiveness of COVID-19 Vaccines in Preventing Ambulatory and Inpatient Care
- Are you the corresponding author?**  
No.

## Certification

I certify that the information provided in this disclosure is complete and accurate.

**Disclosure Purpose:** 21-10362

**Summary of Interests**

I do not have any interests to disclose at this time.

**Additional Questions:**

- 1. **Are there other relationships or activities that readers could perceive to have influenced, or that give the appearance of potentially influencing, what you wrote in the submitted work?**  
No.
- 2. **What is the manuscript title?**  
COVID-19 Vaccine Effectiveness in a Multi-State Network
- 3. **Are you the corresponding author?**  
No.

**Certification**

I certify that the information provided in this disclosure is complete and accurate.



**Disclosure Purpose:** 21-10362

**Summary of Interests**

I do not have any interests to disclose at this time.

**Additional Questions:**

- 1. **Are there other relationships or activities that readers could perceive to have influenced, or that give the appearance of potentially influencing, what you wrote in the submitted work?**  
No.
- 2. **What is the manuscript title?**  
Effectiveness of COVID-19 Vaccines in Preventing Ambulatory and Inpatient Care
- 3. **Are you the corresponding author?**  
No.

**Certification**

I certify that the information provided in this disclosure is complete and accurate.

# Toan Ong

**Disclosure Purpose:** 21-10362

## Summary of Interests

I do not have any interests to disclose at this time.

## Additional Questions:

1. **Are there other relationships or activities that readers could perceive to have influenced, or that give the appearance of potentially influencing, what you wrote in the submitted work?**  
No.
2. **What is the manuscript title?**  
Effectiveness of COVID-19 Vaccines in Preventing Ambulatory and Inpatient Care
3. **Are you the corresponding author?**  
No.

## Certification

I certify that the information provided in this disclosure is complete and accurate.

**Disclosure Purpose:** 21-10362

**Summary of Interests**

I do not have any interests to disclose at this time.

**Additional Questions:**

- 1. **Are there other relationships or activities that readers could perceive to have influenced, or that give the appearance of potentially influencing, what you wrote in the submitted work?**  
No.
- 2. **What is the manuscript title?**  
Effectiveness of COVID-19 Vaccines in Preventing Ambulatory and Inpatient Care
- 3. **Are you the corresponding author?**  
No.

**Certification**

I certify that the information provided in this disclosure is complete and accurate.



**Disclosure Purpose:** 21-10362

**Summary of Interests**

I do not have any interests to disclose at this time.

**Additional Questions:**

- 1. **Are there other relationships or activities that readers could perceive to have influenced, or that give the appearance of potentially influencing, what you wrote in the submitted work?**  
No.
- 2. **What is the manuscript title?**  
Effectiveness of COVID-19 Vaccines in Preventing Ambulatory and Inpatient Care
- 3. **Are you the corresponding author?**  
No.

**Certification**

I certify that the information provided in this disclosure is complete and accurate.



Disclosure Purpose: 21-10362

Summary of Interests

| Company or Organization                                                                                                                                         |                  |                                                                                |
|-----------------------------------------------------------------------------------------------------------------------------------------------------------------|------------------|--------------------------------------------------------------------------------|
| Entity                                                                                                                                                          | Type             | Interest Held By                                                               |
| BioFire Diagnostics, LLC                                                                                                                                        | Grant / Contract | Self                                                                           |
| <i>Recipient Name:</i> Suchitra Rao<br><i>Grant / Contract Description:</i> study of the impact of Respiratory Pathogen Panel<br><i>Additional Information:</i> |                  | <i>Recipient Type:</i> Individual<br><i>Grant / Contract Purpose:</i> Research |
| GlaxoSmithKline                                                                                                                                                 | Grant / Contract | Self                                                                           |
| <i>Recipient Name:</i> Suchitra Rao<br><i>Grant / Contract Description:</i> Influenza Research Grant<br><i>Additional Information:</i>                          |                  | <i>Recipient Type:</i> Individual<br><i>Grant / Contract Purpose:</i> Research |

Additional Questions:

- Are there other relationships or activities that readers could perceive to have influenced, or that give the appearance of potentially influencing, what you wrote in the submitted work?  
No.
- What is the manuscript title?  
Effectiveness of COVID-19 Vaccines in Preventing Ambulatory and Inpatient Care
- Are you the corresponding author?  
No.

Certification

I certify that the information provided in this disclosure is complete and accurate.



**Disclosure Purpose:** 21-10362

### Summary of Interests

I do not have any interests to disclose at this time.

### Additional Questions:

- Are there other relationships or activities that readers could perceive to have influenced, or that give the appearance of potentially influencing, what you wrote in the submitted work?**  
No.
- What is the manuscript title?**  
Effectiveness of COVID-19 Vaccines in Preventing Ambulatory and Inpatient Care
- Are you the corresponding author?**  
No.

### Certification

I certify that the information provided in this disclosure is complete and accurate.

**Disclosure Purpose:** 21-10362

Summary of Interests

I do not have any interests to disclose at this time.

Additional Questions:

- 1. **Are there other relationships or activities that readers could perceive to have influenced, or that give the appearance of potentially influencing, what you wrote in the submitted work?**  
No.
- 2. **What is the manuscript title?**  
Effectiveness of COVID-19 Vaccines in Preventing Ambulatory and Inpatient Care
- 3. **Are you the corresponding author?**  
No.

Certification

I certify that the information provided in this disclosure is complete and accurate.



**Disclosure Purpose:** 21-10362

Summary of Interests

I do not have any interests to disclose at this time.

Additional Questions:

- 1. **Are there other relationships or activities that readers could perceive to have influenced, or that give the appearance of potentially influencing, what you wrote in the submitted work?**  
No.
- 2. **What is the manuscript title?**  
Effectiveness of COVID-19 Vaccines in Preventing Ambulatory and Inpatient Care
- 3. **Are you the corresponding author?**  
No.

Certification

I certify that the information provided in this disclosure is complete and accurate.



**Disclosure Purpose:** 21-10362

**Summary of Interests**

I do not have any interests to disclose at this time.

**Additional Questions:**

- Are there other relationships or activities that readers could perceive to have influenced, or that give the appearance of potentially influencing, what you wrote in the submitted work?**  
No.
- What is the manuscript title?**  
COVID-19 Vaccine Effectiveness in Preventing Hospital, Emergency, and Urgent Care in a Multi-State Network
- Are you the corresponding author?**  
No.

**Certification**

I certify that the information provided in this disclosure is complete and accurate.



**Disclosure Purpose:** 21-10362

**Summary of Interests**

I do not have any interests to disclose at this time.

**Additional Questions:**

- 1. **Are there other relationships or activities that readers could perceive to have influenced, or that give the appearance of potentially influencing, what you wrote in the submitted work?**  
No.
- 2. **What is the manuscript title?**  
Effectiveness of COVID-19 Vaccines in Preventing Ambulatory and Inpatient Care
- 3. **Are you the corresponding author?**  
No.

**Certification**

I certify that the information provided in this disclosure is complete and accurate.

Disclosure Purpose: 21-10362

Summary of Interests

I do not have any interests to disclose at this time.

Additional Questions:

- 1. **Are there other relationships or activities that readers could perceive to have influenced, or that give the appearance of potentially influencing, what you wrote in the submitted work?**  
No.
- 2. **What is the manuscript title?**  
Effectiveness of COVID-19 Vaccines in Preventing Ambulatory and Inpatient Care
- 3. **Are you the corresponding author?**  
No.

Certification

I certify that the information provided in this disclosure is complete and accurate.



# Mark Thompson

**Disclosure Purpose:** 21-10362

## Summary of Interests

I do not have any interests to disclose at this time.

## Additional Questions:

1. **Are there other relationships or activities that readers could perceive to have influenced, or that give the appearance of potentially influencing, what you wrote in the submitted work?**

No.

2. **What is the manuscript title?**

COVID-19 Vaccine Effectiveness in Preventing Ambulatory and Inpatient Care

3. **Are you the corresponding author?**

Yes.

- a. **Please list the other authors' names here.**

Edward Stenehjem, MD., MSc. 2, Shaun Grannis, MD., MS. 3-4, Sarah W. Ball, ScD., MS. 5, Allison L. Naleway, PhD. 6, Toan C. Ong, PhD. 7, Malini B. DeSilva, MD., MPH. 8, Karthik Natarajan, PhD. 9,10, Catherine H. Bozio, PhD., MPH. 1, Ned Lewis, MPH. 11, Kristin Dascomb, MD., PhD. 2, Brian E. Dixon MPA., PhD. 3,12, Rebecca J. Birch, MPH. 5, Stephanie A. Irving, MHS. 6, Suchitra Rao, MD. 7, Elyse Kharbanda, MD., MPH. 8, Jungmi Han, BS. 9, Sue Reynolds, PhD., MS., MPH. 1, Kristin Goddard, MPH. 11, Nancy Grisel, MPP. 2, William F. Fadel, PhD. 3,12, Matthew E. Levy, PhD. 5, Jill Ferdinands, PhD. 1, Bruce Fireman, PhD. 11, Julie Arndorfer, MPH. 2, Nimish Ramesh Valvi, DrPH., MBBS., MPH. 3,12, Elizabeth A. Rowley, DrPH., MS. 5, Palak Patel, MBBS., MPH. 1, Ousseny Zerbo, PhD. 11, Eric P. Griggs, MPH. 1, Rachael M. Porter, MPH. 1, Maria Demarco, PhD. 5, Lenee Blanton, MPH. 1, Andrea Steffens, MPH. 1, Yan Zhuang, PhD., MS. 5, Natalie Olson, MPH. 1, Michelle Barron, MD. 7, Patricia Shifflett, RN., MS. 5, Stephanie J Schrag, DPhil. 1, Jennifer R. Verani, MD., MPH. 1, Alicia Fry, MD., MPH. 1, Manjusha Gaglani, MBBS. 13, Eduardo Azziz-Baumgartner, MD., MPH. 1, Nicola P. Klein, MD., PhD.

## Certification

I certify that the information provided in this disclosure is complete and accurate.



**Disclosure Purpose:** 21-10362

Summary of Interests

I do not have any interests to disclose at this time.

Additional Questions:

- 1. **Are there other relationships or activities that readers could perceive to have influenced, or that give the appearance of potentially influencing, what you wrote in the submitted work?**  
No.
- 2. **What is the manuscript title?**  
Effectiveness of COVID-19 Vaccines in Preventing Ambulatory and Inpatient Care
- 3. **Are you the corresponding author?**  
No.

Certification

I certify that the information provided in this disclosure is complete and accurate.



**Disclosure Purpose:** 21-10362

**Summary of Interests**

I do not have any interests to disclose at this time.

**Additional Questions:**

- 1. **Are there other relationships or activities that readers could perceive to have influenced, or that give the appearance of potentially influencing, what you wrote in the submitted work?**  
No.
- 2. **What is the manuscript title?**  
Effectiveness of COVID-19 Vaccines in Preventing Ambulatory and Inpatient Care
- 3. **Are you the corresponding author?**  
No.

**Certification**

I certify that the information provided in this disclosure is complete and accurate.

**Disclosure Purpose:** 21-10362

**Summary of Interests**

I do not have any interests to disclose at this time.

**Additional Questions:**

- 1. **Are there other relationships or activities that readers could perceive to have influenced, or that give the appearance of potentially influencing, what you wrote in the submitted work?**  
No.
- 2. **What is the manuscript title?**  
Effectiveness of COVID-19 Vaccines in Preventing Ambulatory and Inpatient Care
- 3. **Are you the corresponding author?**  
No.

**Certification**

I certify that the information provided in this disclosure is complete and accurate.



**Disclosure Purpose:** 21-10362

**Summary of Interests**

I do not have any interests to disclose at this time.

**Additional Questions:**

- 1. **Are there other relationships or activities that readers could perceive to have influenced, or that give the appearance of potentially influencing, what you wrote in the submitted work?**  
No.
- 2. **What is the manuscript title?**  
Effectiveness of COVID-19 Vaccines in Preventing Ambulatory and Inpatient Care
- 3. **Are you the corresponding author?**  
No.

**Certification**

I certify that the information provided in this disclosure is complete and accurate.



Supplement: NEJMoa2110362_disclosures.pdf [file NEJMoa2110362_disclosures.pdf]
