# Supplementary material
Source: PubMed Central journal article supplement (PMC8451184)
Supplement: NEJMoa2110362_data-sharing.pdf [file NEJMoa2110362_data-sharing.pdf]

## Data Sharing Statement

Thompson MG, Stenehjem E, Grannis S, et al. Effectiveness of Covid-19 Vaccines in Ambulatory and Inpatient Care Settings. N Engl J Med. DOI: 10.1056/NEJMoa2110362.

| Question                                                            | Authors' Response                                                                                                                   |
|---------------------------------------------------------------------|-------------------------------------------------------------------------------------------------------------------------------------|
| Will the data collected for your study be made available to others? | No                                                                                                                                  |
| Would you like to offer context for your decision?                  | CDC will share aggregate data once study objectives are complete and consistent with data use agreements with partner institutions. |
| Which data?                                                         | —                                                                                                                                   |
| Additional information about data                                   | —                                                                                                                                   |
| How or where can the data be obtained?                              | —                                                                                                                                   |
| When will data availability begin?                                  | —                                                                                                                                   |
| When will data availability end?                                    | —                                                                                                                                   |
| Will any supporting documents be available?                         | —                                                                                                                                   |
| Which supporting documents?                                         | —                                                                                                                                   |
| Additional information about supporting documents                   | —                                                                                                                                   |
| How or where can supporting documents be obtained?                  | —                                                                                                                                   |
| When will supporting documents availability begin?                  | —                                                                                                                                   |
| When will supporting documents availability end?                    | —                                                                                                                                   |
| To whom will data be available?                                     | —                                                                                                                                   |
| For what type of analysis or purpose?                               | —                                                                                                                                   |
| By what mechanism?                                                  | —                                                                                                                                   |
| Any other restrictions?                                             | —                                                                                                                                   |
| Additional information                                              | —                                                                                                                                   |

This statement was posted on September 8, 2021, at NEJM.org.
